# Supplementary material for: Enantioselective synthesis of trifluoromethyl substituted cyclohexanonesviaan organocatalytic cascade Michael/aldol reaction
Source: Royal Society of Chemistry journal article supplement (doi:10.1039/d0ob00004c), 2020-01-01

# Enantioselective synthesis of trifluoromethyl substituted cyclohexanones *via* organocatalytic cascade Michael/Aldol reaction

Hongzhou Yang, †<sup>a</sup> Qingqing Wang, †<sup>a</sup> Yuan Luo, <sup>a</sup> Ling Ye, <sup>b</sup> Xinying Li, <sup>a</sup> Feng Chen, <sup>a</sup> Zhigang  
Zhao <sup>a</sup> and Xuefeng Li <sup>\*a</sup>

<sup>a</sup> College of Chemistry and Environment Protection Engineering, Southwest Minzu University,  
Chengdu 610041, China.

<sup>b</sup> Faculty of Geosciences and Environmental Engineering, Southwest Jiaotong University,  
Chengdu 610031, China.

E-mail: lixuefeng@swun.edu.cn

## Table of contents:

|                                                                        |    |
|------------------------------------------------------------------------|----|
| 1. General methods.....                                                | 2  |
| 2. General procedure for the cascade Michael/aldol reaction .....      | 2  |
| 3. General procedure for the cascade Michael/aldol condensation.....   | 15 |
| 4. General procedure for the syntheses of <b>5</b> and <b>5'</b> ..... | 18 |
| 5. General procedure for the syntheses of <b>6</b> and <b>6'</b> ..... | 19 |
| 6. X-ray crystallographic analysis of <b>3ac</b> (CCDC 1973697) .....  | 21 |
| 7. X-ray crystallographic analysis of <b>3al'</b> (CCDC 1973712) ..... | 22 |
| 8. Reference.....                                                      | 23 |
| 9. NMR spectra and HPLC chromatograms of products .....                | 24 |

## 1. General methods

$^1\text{H}$  and  $^{13}\text{C}$  NMR spectra were recorded on Varian 400 MHz spectrometers. Chemical shifts ( $\delta$ ) are reported in ppm downfield from  $\text{CDCl}_3$  ( $\delta = 7.26$  ppm) for  $^1\text{H}$  NMR and relative to the central  $\text{CDCl}_3$  resonance ( $\delta = 77.0$  ppm) for  $^{13}\text{C}$  NMR spectroscopy. Coupling constants ( $J$ ) are given in Hz. ESI-HRMS spectrometer was measured with a Thermo Scientific LTQ Orbitrap XL mass spectrometer. Enantiomeric excess was determined by HPLC analysis on Chiralpak AS-H, AD-H, OD-H and OJ-H columns in comparison with the authentic racemates. Optical rotation data were recorded on Rudolph Autopol I automatic polarimeter. Commercial grade solvents were dried and purified by standard procedures as specified in Purification of Laboratory Chemicals, 4th Ed (Armarego, W. L. F.; Perrin, D. D. Butterworth Heinemann: 1997).

Primary amines **C1-C4** were prepared according to literature procedures.<sup>1</sup>

## 2. General procedure for the cascade Michael/aldol reaction

Ethyl 4,4,4-trifluoroacetoacetate **2a** (19.0  $\mu\text{L}$ , 0.13 mmol),  $\beta$ -naphthyl-substituted cinnamone **1a** (19.6 mg, 0.1 mmol), primary amine **C3** based on quinidine (6.5 mg, 0.02 mmol) and benzoic acid (3.7 mg, 0.03 mmol) were stirred in redistilled 1,2-dichloroethane (1 mL) at room temperature. After due reaction time, the reaction mixture was concentrated *in vacuo*. The residue was purified by flash chromatography on silica gel (EtOAc/petroleum ether) to afford the desired adduct. Notably, all these diastereomers were readily separable *via* flash chromatography.

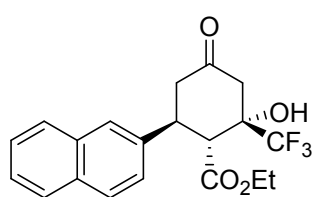

**Ethyl (1R, 2S, 6S)-2-hydroxy-6-(naphthalen-2-yl)-4-oxo-2-(trifluoromethyl)cyclohexane-1-carboxylate (3aa) (less polar):**

White solid; 47% yield purified by flash column chromatography (EtOAc/petroleum ether);  $^1\text{H}$  NMR (400 MHz,  $\text{CDCl}_3$ )  $\delta$  (ppm): 7.86-7.79 (m, 3H), 7.68 (s, 1H), 7.51-7.49 (m, 2H), 7.39 (d,  $J = 8.4$  Hz, 1H), 4.96 (br s, 1H), 3.82-3.69 (m, 3H), 3.40 (d,  $J = 12.0$  Hz, 1H), 2.87 (d,  $J = 14.8$  Hz, 1H), 2.84-2.73 (m, 2H), 2.68 (d,  $J = 14.8$  Hz, 1H), 0.62 (t,  $J = 7.0$  Hz, 3H);  $^{13}\text{C}$  NMR (100 MHz,  $\text{CDCl}_3$ )  $\delta$  (ppm): 202.7, 173.5, 136.0, 133.3, 132.9, 128.8, 127.7, 127.6, 126.9, 126.5, 126.3, 124.7, 124.5 (q,  $^1J_{\text{C-F}} = 285.2$  Hz), 76.5 (q,  $^2J_{\text{C-F}} = 29.0$  Hz), 61.7, 49.2, 47.1, 44.8, 43.1, 13.2;  $^{19}\text{F}$  NMR (376 MHz,  $\text{CDCl}_3$ )  $\delta$  (ppm): -81.3; ESI-HRMS:  $[\text{M}+\text{H}]^+$  calcd. for  $\text{C}_{20}\text{H}_{20}\text{F}_3\text{O}_4$  381.1308, found 381.1309; 95% ee was determined by HPLC on

AS-H column, hexane/*i*-propanol (80/20), 1.0 mL/min, UV 210 nm,  $t_{\text{major}} = 12.747$  min,  $t_{\text{minor}} = 19.527$  min;  $[\alpha]_{\text{D}}^{25} = -26.6^\circ$  ( $c = 0.218$ ,  $\text{CHCl}_3$ ).

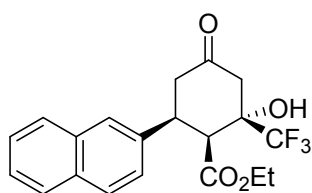

**Ethyl (1*S*, 2*S*, 6*S*)-2-hydroxy-6-(naphthalen-2-yl)-4-oxo-2-(trifluoromethyl)cyclohexane-1-carboxylate (3aa')** (more polar):

White solid; 47% yield purified by flash column chromatography (EtOAc/petroleum ether);  $^1\text{H}$  NMR (400 MHz,  $\text{CDCl}_3$ )  $\delta$  (ppm):

7.82-7.78 (m, 3H), 7.63 (s, 1H), 7.49-7.47 (m, 2H), 7.36 (d,  $J = 8.4$  Hz, 1H), 4.07 (dt,  $J = 13.6, 4.4$  Hz, 1H), 3.92-3.84 (m, 1H), 3.82-3.74 (m, 1H), 3.69 (d,  $J = 14.4$  Hz, 1H), 3.57 (d,  $J = 14.8$  Hz, 1H), 3.38 (d,  $J = 4.0$  Hz, 1H), 3.25 (br s, 1H), 2.74-2.65 (d,  $J = 14.4$  Hz, 2H), 0.76 (t,  $J = 7.2$  Hz, 3H);  $^{13}\text{C}$  NMR (100 MHz,  $\text{DMSO-d}_6$ )  $\delta$  (ppm): 205.5, 169.5, 136.8, 133.0, 132.2, 128.0, 127.8, 127.4, 126.3, 126.1, 126.0, 126.0 (q,  $^1J_{\text{C-F}} = 285.1$  Hz), 125.4, 75.3 (q,  $^2J_{\text{C-F}} = 28.8$  Hz), 60.3, 49.8, 42.3, 40.4, 38.6, 13.4;  $^{19}\text{F}$  NMR (376 MHz,  $\text{CDCl}_3$ )  $\delta$  (ppm): -81.5; ESI-HRMS:  $[\text{M}+\text{H}]^+$  calcd. for  $\text{C}_{20}\text{H}_{20}\text{F}_3\text{O}_4$  381.1308, found 381.1305; 99% ee was determined by HPLC on AS-H column, hexane/*i*-propanol (90/10), 1.0 mL/min, UV 210 nm,  $t_{\text{major}} = 15.757$  min,  $t_{\text{minor}} = 21.817$  min;  $[\alpha]_{\text{D}}^{25} = -53.8^\circ$  ( $c = 0.346$ ,  $\text{CHCl}_3$ ).

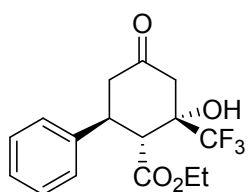

**Ethyl (1*R*, 2*S*, 6*S*)-2-hydroxy-4-oxo-6-phenyl-2-(trifluoromethyl)cyclohexane-1-carboxylate (3ab)** (less polar): White solid; 45% yield

purified by flash column chromatography (EtOAc/petroleum ether);  $^1\text{H}$  NMR (400 MHz,  $\text{CDCl}_3$ )  $\delta$  (ppm):  $\delta = 7.36$ -7.29 (m, 3H), 7.24 (d,  $J = 6.8$

Hz, 2H), 4.90 (d,  $J = 2.0$  Hz, 1H), 3.85 (q,  $J = 7.2$  Hz, 2H), 3.57 (dt,  $J = 11.6, 8.8$  Hz, 1H), 3.25 (d,  $J = 12.0$  Hz, 1H), 2.83 (d,  $J = 15.2$  Hz, 1H), 2.69 (d,  $J = 9.6$  Hz, 2H), 2.63 (dd,  $J = 15.0, 2.2$  Hz, 1H), 0.80 (t,  $J = 7.0$  Hz, 3H);  $^{13}\text{C}$  NMR (100 Hz,  $\text{CD}_3\text{COCD}_3$ )  $\delta$  (ppm): 204.2, 174.3, 141.6, 130.2, 129.6, 129.2, 126.7 (q,  $^1J_{\text{C-F}} = 284.9$  Hz), 78.2 (q,  $^2J_{\text{C-F}} = 28.6$  Hz), 62.6, 50.8, 48.2, 46.5, 44.5, 14.5;  $^{19}\text{F}$  NMR (376 MHz,  $\text{CDCl}_3$ )  $\delta$  (ppm): -81.4; ESI-HRMS:  $[\text{M}+\text{H}]^+$  calcd. for  $\text{C}_{16}\text{H}_{18}\text{F}_3\text{O}_4$  331.1152, found 331.1150; 96% ee was determined by HPLC on AS-H column, hexane/*i*-propanol (80/20), 1.0 mL/min, UV 210 nm,  $t_{\text{major}} = 9.830$  min,  $t_{\text{minor}} = 14.350$  min;  $[\alpha]_{\text{D}}^{25} = 21.3^\circ$  ( $c = 0.280$ ,  $\text{CHCl}_3$ ).

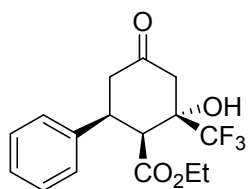

**Ethyl (1*S*, 2*S*, 6*S*)-2-hydroxy-4-oxo-6-phenyl-2-(trifluoromethyl)cyclohexane-1-carboxylate (3ab')** (more polar): White solid; 53% yield purified by flash column chromatography (EtOAc/petroleum ether);  $^1\text{H}$

NMR (400 MHz, CDCl<sub>3</sub>)  $\delta$  (ppm): 7.33 (t,  $J = 7.2$  Hz, 2H), 7.27 (t,  $J = 7.2$  Hz, 1H), 7.21 (d,  $J = 6.8$  Hz, 2H), 3.96-3.83 (m, 3H), 3.57 (t,  $J = 14.0$  Hz, 1H), 3.52 (t,  $J = 14.4$  Hz, 1H), 3.44 (br s, 1H), 3.24 (d,  $J = 4.4$  Hz, 1H), 2.64 (d,  $J = 14.8$  Hz, 1H), 2.56 (dd,  $J = 14.4, 4.0$  Hz, 1H), 0.92 (t,  $J = 7.0$  Hz, 3H); <sup>13</sup>C NMR (100 Hz, DMSO-d<sub>6</sub>)  $\delta$  (ppm): 205.5, 169.5, 139.2, 128.5, 127.31, 127.28, 124.9 (q, <sup>1</sup> $J_{C-F} = 285.1$  Hz), 75.2 (q, <sup>2</sup> $J_{C-F} = 28.7$  Hz), 60.3, 49.7, 42.2, 40.3, 38.5, 13.5; <sup>19</sup>F NMR (376 MHz, CDCl<sub>3</sub>)  $\delta$  (ppm): -81.4; ESI-HRMS: [M+H]<sup>+</sup> calcd. for C<sub>16</sub>H<sub>18</sub>F<sub>3</sub>O<sub>4</sub> 331.1152, found 331.1158; 99% ee was determined by HPLC on AS-H column, hexane/*i*-propanol (80/20), 1.0 mL/min, UV 210 nm,  $t_{\text{major}} = 6.897$  min,  $t_{\text{minor}} = 18.483$  min;  $[\alpha]_{\text{D}}^{25} = 56.5^\circ$  ( $c = 0.278$ , CHCl<sub>3</sub>).

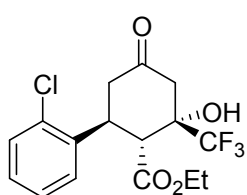

**Ethyl (1R, 2S, 6S)-6-(2-chlorophenyl)-2-hydroxy-4-oxo-2-(trifluoromethyl)cyclohexane-1-carboxylate (3ac) (less polar):** White solid; 51% yield purified by flash column chromatography (EtOAc/petroleum ether);

<sup>1</sup>H NMR (400 MHz, DMSO-d<sub>6</sub>)  $\delta$  (ppm): 7.65 (d,  $J = 6.4$  Hz, 1H), 7.41 (d,  $J = 8.0$  Hz, 1H), 7.36 (t,  $J = 7.4$  Hz, 1H), 7.25 (t,  $J = 7.4$  Hz, 1H), 6.71 (br s, 1H), 4.21 (t,  $J = 12.0$  Hz, 1H), 3.81-3.76 (m, 3H), 3.07 (d,  $J = 14.0$  Hz, 1H), 2.70 (t,  $J = 14.0$  Hz, 1H), 2.57 (d,  $J = 14.0$  Hz, 1H), 2.34 (d,  $J = 13.2$  Hz, 1H), 0.84 (t,  $J = 7.0$  Hz, 3H); <sup>13</sup>C NMR (100 Hz, DMSO-d<sub>6</sub>)  $\delta$  (ppm): 203.9, 169.5, 138.3, 133.0, 129.5, 128.7, 128.4, 127.6, 124.9 (q, <sup>1</sup> $J_{C-F} = 285.5$  Hz), 75.8 (q, <sup>2</sup> $J_{C-F} = 28.5$  Hz), 60.0, 48.6, 46.1, 45.9, 36.6, 13.4; <sup>19</sup>F NMR (376 MHz, CDCl<sub>3</sub>)  $\delta$  (ppm): -81.3; ESI-HRMS: [M+H]<sup>+</sup> calcd. for C<sub>16</sub>H<sub>17</sub><sup>35</sup>ClF<sub>3</sub>O<sub>4</sub> 365.0762, found 365.0765; calcd. for C<sub>16</sub>H<sub>17</sub><sup>37</sup>ClF<sub>3</sub>O<sub>4</sub> 367.0732, found 367.0734; 97% ee was determined by HPLC on AS-H column, hexane/*i*-propanol (80/20), 1.0 mL/min, UV 210 nm,  $t_{\text{minor}} = 10.863$  min,  $t_{\text{major}} = 12.037$  min;  $[\alpha]_{\text{D}}^{25} = 22.9^\circ$  ( $c = 0.188$ , CHCl<sub>3</sub>).

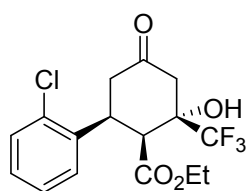

**Ethyl (1S, 2S, 6S)-6-(2-chlorophenyl)-2-hydroxy-4-oxo-2-(trifluoromethyl)cyclohexane-1-carboxylate (3ac') (more polar):** White solid; 46% yield purified by flash column chromatography (EtOAc/petroleum ether);

<sup>1</sup>H NMR (400 MHz, CDCl<sub>3</sub>)  $\delta$  (ppm): 7.43 (dd,  $J = 5.2, 3.6$  Hz, 1H), 7.26-7.24 (m, 2H), 7.18-7.15 (m, 1H), 4.38 (dt,  $J = 14.0, 4.2$  Hz, 1H), 3.98-3.77 (m, 2H), 3.59 (t,  $J = 14.0$  Hz, 1H), 3.50 (d,  $J = 14.8$  Hz, 1H), 3.42 (d,  $J = 3.2$  Hz, 1H), 2.67 (d,  $J = 14.4$  Hz, 1H), 2.48 (dd,  $J = 14.6, 3.4$  Hz, 1H), 0.91 (t,  $J = 7.0$  Hz, 3H); <sup>13</sup>C NMR (100 MHz, CDCl<sub>3</sub>)  $\delta$  (ppm): 206.8, 169.7, 135.8, 134.0, 130.0, 128.9, 127.5, 127.0, 124.3 (q, <sup>1</sup> $J_{C-F} = 283.9$  Hz), 76.5 (q, <sup>2</sup> $J_{C-F} = 29.9$  Hz), 61.0, 47.0,

43.3, 40.6, 36.1, 13.6;  $^{19}\text{F}$  NMR (376 MHz,  $\text{CDCl}_3$ )  $\delta$  (ppm): -81.4; ESI-HRMS:  $[\text{M}+\text{H}]^+$  calcd. for  $\text{C}_{16}\text{H}_{17}^{35}\text{ClF}_3\text{O}_4$  365.0762, found 365.0766; calcd. for  $\text{C}_{16}\text{H}_{17}^{37}\text{ClF}_3\text{O}_4$  367.0732, found 367.0744; 99% ee was determined by HPLC on AS-H column, hexane/*i*-propanol (90/10), 1.0 mL/min, UV 210 nm,  $t_{\text{major}} = 7.360$  min,  $t_{\text{minor}} = 9.787$  min;  $[\alpha]_{\text{D}}^{25} = 87.8^\circ$  ( $c = 0.368$ ,  $\text{CHCl}_3$ ).

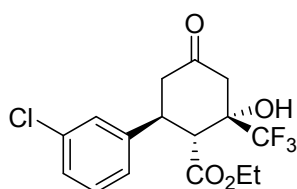

**Ethyl (1R, 2S, 6S)-6-(3-chlorophenyl)-2-hydroxy-4-oxo-2-(trifluoromethyl)cyclohexane-1-carboxylate (3ad) (less polar):** White

solid; 48% yield purified by flash column chromatography (EtOAc/petroleum ether);  $^1\text{H}$  NMR (400 MHz,  $\text{CDCl}_3$ )  $\delta$  (ppm):

7.34-7.27 (m, 2H), 7.26 (s, 1H), 7.14-7.12 (m, 1H), 4.84 (d,  $J = 2.0$  Hz, 1H), 3.97-3.85 (m, 2H), 3.56 (td,  $J = 12.2, 5.6$  Hz, 1H), 3.24 (d,  $J = 12.0$  Hz, 1H), 2.84 (d,  $J = 15.2$  Hz, 1H), 2.71-2.59 (m, 3H), 0.87 (t,  $J = 7.2$  Hz, 3H);  $^{13}\text{C}$  NMR (100 MHz,  $\text{CDCl}_3$ )  $\delta$  (ppm): 202.2, 173.2, 140.7, 134.7, 130.2, 128.2, 127.7, 125.9, 124.4 (q,  $^1J_{\text{C-F}} = 285.3$  Hz), 76.4 (q,  $^2J_{\text{C-F}} = 29.1$  Hz), 61.9, 49.1, 46.8, 44.7, 42.5, 13.4;  $^{19}\text{F}$  NMR (376 MHz,  $\text{CDCl}_3$ )  $\delta$  (ppm): -81.3; ESI-HRMS:  $[\text{M}+\text{H}]^+$  calcd. for  $\text{C}_{16}\text{H}_{17}^{35}\text{ClF}_3\text{O}_4$  365.0762, found 365.0765; calcd. for  $\text{C}_{16}\text{H}_{17}^{37}\text{ClF}_3\text{O}_4$  367.0732, found 367.0734; 95% ee was determined by HPLC on AS-H column, hexane/*i*-propanol (80/20), 1.0 mL/min, UV 210 nm,  $t_{\text{minor}} = 7.777$  min,  $t_{\text{major}} = 10.957$  min;  $[\alpha]_{\text{D}}^{25} = 20.4^\circ$  ( $c = 0.186$ ,  $\text{CHCl}_3$ ).

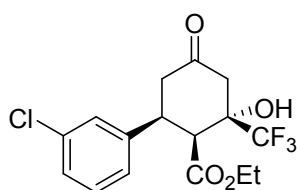

**Ethyl (1S, 2S, 6S)-6-(3-chlorophenyl)-2-hydroxy-4-oxo-2-(trifluoromethyl)cyclohexane-1-carboxylate (3ad') (more polar):** White

solid; 48% yield purified by flash column chromatography (EtOAc/petroleum ether);  $^1\text{H}$  NMR (400 MHz,  $\text{CDCl}_3$ )  $\delta$  (ppm):

7.31-7.24 (m, 2H), 7.22 (s, 1H), 7.14-7.10 (m, 1H), 3.95 (q,  $J = 7.2$  Hz, 2H), 3.87 (dt,  $J = 14.0, 4.6$  Hz, 1H), 3.52 (t,  $J = 14.4$  Hz, 1H), 3.51 (d,  $J = 14.8$  Hz, 1H), 3.44 (br s, 1H), 3.23 (d,  $J = 4.4$  Hz, 1H), 2.65 (d,  $J = 14.8$  Hz, 1H), 2.55 (dd,  $J = 14.6, 4.2$  Hz, 1H), 0.98 (t,  $J = 7.2$  Hz, 3H);  $^{13}\text{C}$  NMR (100 MHz,  $\text{CDCl}_3$ )  $\delta$  (ppm): 207.4, 169.7, 140.8, 134.6, 129.9, 127.9, 127.6, 125.6, 124.3 (q,  $^1J_{\text{C-F}} = 283.9$  Hz), 76.4 (q,  $^2J_{\text{C-F}} = 29.9$  Hz), 61.2, 49.8, 43.2, 40.9, 39.4, 13.6;  $^{19}\text{F}$  NMR (376 MHz,  $\text{CDCl}_3$ )  $\delta$  (ppm): -81.4; ESI-HRMS:  $[\text{M}+\text{H}]^+$  calcd. for  $\text{C}_{16}\text{H}_{17}^{35}\text{ClF}_3\text{O}_4$  365.0762, found 365.0769; calcd. for  $\text{C}_{16}\text{H}_{17}^{37}\text{ClF}_3\text{O}_4$  367.0732, found 367.0740; 99% ee was determined by HPLC on AS-H column, hexane/*i*-propanol (90/10), 1.0 mL/min, UV 210 nm,  $t_{\text{major}} = 8.640$  min,  $t_{\text{minor}} = 22.067$  min;  $[\alpha]_{\text{D}}^{25} = -56.1^\circ$  ( $c = 0.180$ ,  $\text{CHCl}_3$ ).

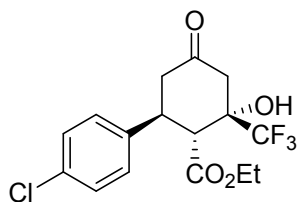

**Ethyl (1R, 2S, 6S)-6-(4-chlorophenyl)-2-hydroxy-4-oxo-2-(trifluoromethyl)cyclohexane-1-carboxylate (3ae) (less polar):** White

solid; 49% yield purified by flash column chromatography (EtOAc/petroleum ether); <sup>1</sup>H NMR (400 MHz, CDCl<sub>3</sub>) δ (ppm): 7.32 (d, *J* = 8.4 Hz, 2H), 7.18 (d, *J* = 8.4 Hz, 2H), 4.81 (d, *J* = 2.0 Hz, 1H), 3.88 (q, *J* = 7.2 Hz, 2H), 3.56 (td, *J* = 12.0, 6.0 Hz, 1H), 3.21 (d, *J* = 12.0 Hz, 1H), 2.82 (d, *J* = 14.8 Hz, 1H), 2.68-2.57 (m, 3H), 0.87 (t, *J* = 7.2 Hz, 3H); <sup>13</sup>C NMR (100 MHz, CDCl<sub>3</sub>) δ (ppm): 202.3, 173.2, 137.2, 133.9, 129.1, 128.9, 124.4 (q, <sup>1</sup>*J*<sub>C-F</sub> = 285.1 Hz), 76.4 (q, <sup>2</sup>*J*<sub>C-F</sub> = 28.9 Hz), 61.9, 49.3, 46.9, 44.7, 42.3, 13.4; <sup>19</sup>F NMR (376 MHz, CDCl<sub>3</sub>) δ (ppm): -81.3; ESI-HRMS: [M+H]<sup>+</sup> calcd. for C<sub>16</sub>H<sub>17</sub><sup>35</sup>ClF<sub>3</sub>O<sub>4</sub> 365.0762, found 365.0767; calcd. for C<sub>16</sub>H<sub>17</sub><sup>37</sup>ClF<sub>3</sub>O<sub>4</sub> 367.0732, found 367.0734; 96% ee was determined by HPLC on AS-H column, hexane/*i*-propanol (80/20), 1.0 mL/min, UV 210 nm, *t*<sub>minor</sub> = 10.110 min, *t*<sub>major</sub> = 13.047 min; [α]<sub>D</sub><sup>25</sup> = 21.4° (*c* = 0.154, CHCl<sub>3</sub>).

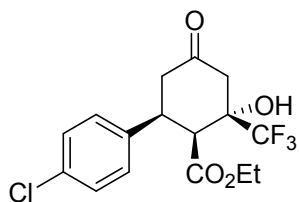

**Ethyl (1S, 2S, 6S)-6-(3-chlorophenyl)-2-hydroxy-4-oxo-2-(trifluoromethyl)cyclohexane-1-carboxylate (3ae') (more polar):**

White solid; 49% yield purified by flash column chromatography (EtOAc/petroleum ether); <sup>1</sup>H NMR (400 MHz, CDCl<sub>3</sub>) δ (ppm): 7.31 (d, *J* = 8.4 Hz, 2H), 7.15 (d, *J* = 8.4 Hz, 2H), 4.00-3.79 (m, 4H), 3.55 (d, *J* = 14.0 Hz, 1H), 3.48 (d, *J* = 14.4 Hz, 1H), 3.22 (d, *J* = 4.0 Hz, 1H), 2.61 (d, *J* = 14.8 Hz, 1H), 2.53 (dd, *J* = 14.2, 3.4 Hz, 1H), 0.97 (t, *J* = 7.2 Hz, 3H); <sup>13</sup>C NMR (100 MHz, CDCl<sub>3</sub>) δ (ppm): 207.2, 169.7, 137.2, 133.5, 128.9, 128.7, 124.2 (q, <sup>1</sup>*J*<sub>C-F</sub> = 283.9 Hz), 76.4 (q, <sup>2</sup>*J*<sub>C-F</sub> = 29.8 Hz), 61.1, 49.9, 43.3, 41.0, 39.1, 13.6; <sup>19</sup>F NMR (376 MHz, CDCl<sub>3</sub>) δ (ppm): -81.4; ESI-HRMS: [M+H]<sup>+</sup> calcd. for C<sub>16</sub>H<sub>17</sub><sup>35</sup>ClF<sub>3</sub>O<sub>4</sub> 365.0762, found 365.0765; calcd. for C<sub>16</sub>H<sub>17</sub><sup>37</sup>ClF<sub>3</sub>O<sub>4</sub> 367.0732, found 367.0734; 99% ee was determined by HPLC on AS-H column, hexane/*i*-propanol (70/30), 1.0 mL/min, UV 210 nm, *t*<sub>major</sub> = 5.430 min, *t*<sub>minor</sub> = 9.880 min; [α]<sub>D</sub><sup>25</sup> = 58.0° (*c* = 0.262, CHCl<sub>3</sub>).

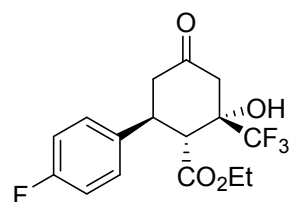

**Ethyl (1R, 2S, 6S)-6-(4-fluorophenyl)-2-hydroxy-4-oxo-2-(trifluoromethyl)cyclohexane-1-carboxylate (3af) (less polar):** White

solid; 49% yield purified by flash column chromatography (EtOAc/petroleum ether); <sup>1</sup>H NMR (400 MHz, CDCl<sub>3</sub>) δ (ppm): 7.22 (dd, *J* = 8.4, 5.2 Hz, 2H), 7.04 (t, *J* = 8.6 Hz, 2H), 4.83 (d, *J* = 1.6 Hz, 1H), 3.87 (q, *J* = 7.2 Hz, 2H),

3.57 (td,  $J = 12.2, 5.6$  Hz, 1H), 3.20 (d,  $J = 12.0$  Hz, 1H), 2.83 (d,  $J = 14.8$  Hz, 1H), 2.69-2.57 (m, 3H), 0.87 (t,  $J = 7.2$  Hz, 3H);  $^{13}\text{C}$  NMR (100 MHz,  $\text{CDCl}_3$ )  $\delta$  (ppm): 202.4, 173.3, 162.3 (d,  $^1J_{\text{C-F}} = 245.9$  Hz), 134.5 (d,  $^4J_{\text{C-F}} = 3.3$  Hz), 129.2 (d,  $^3J_{\text{C-F}} = 8.0$  Hz), 124.5 (q,  $^1J_{\text{C-F}} = 285.1$  Hz), 115.8 (q,  $^2J_{\text{C-F}} = 21.4$  Hz), 76.4 (q,  $^2J_{\text{C-F}} = 29.0$  Hz), 61.9, 49.5, 47.2, 44.7, 42.2, 13.4;  $^{19}\text{F}$  NMR (376 MHz,  $\text{CDCl}_3$ )  $\delta$  (ppm): -81.4, -113.8; ESI-HRMS:  $[\text{M}+\text{H}]^+$  calcd. for  $\text{C}_{16}\text{H}_{17}\text{F}_4\text{O}_4$  349.1057, found 349.1057; 96% ee was determined by HPLC on AS-H column, hexane/*i*-propanol (80/20), 1.0 mL/min, UV 210 nm,  $t_{\text{minor}} = 10.943$  min,  $t_{\text{major}} = 14.413$  min;  $[\alpha]_{\text{D}}^{25} = 18.1^\circ$  ( $c = 0.574$ ,  $\text{CHCl}_3$ ).

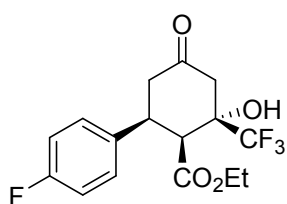

**Ethyl (1*S*, 2*S*, 6*S*)-6-(4-fluorophenyl)-2-hydroxy-4-oxo-2-(trifluoromethyl)cyclohexane-1-carboxylate (3af') (more polar):**

White solid; 49% yield purified by flash column chromatography (EtOAc/petroleum ether);  $^1\text{H}$  NMR (400 MHz,  $\text{CDCl}_3$ )  $\delta$  (ppm): 7.18 (dd,  $J = 8.4, 5.2$  Hz, 2H), 7.02 (t,  $J = 8.6$  Hz, 2H), 3.97-3.86 (m, 3H), 3.71 (br s, 1H), 3.52 (t,  $J = 13.8$  Hz, 1H), 3.48 (d,  $J = 14.8$  Hz, 1H), 3.22 (d,  $J = 4.4$  Hz, 1H), 2.66 (d,  $J = 14.8$  Hz, 1H), 2.53 (dd,  $J = 14.4, 3.6$  Hz, 1H), 0.94 (t,  $J = 7.2$  Hz, 3H);  $^{13}\text{C}$  NMR (100 MHz,  $\text{CDCl}_3$ )  $\delta$  (ppm): 207.2, 169.7, 162.1 (d,  $^1J_{\text{C-F}} = 245.2$  Hz), 134.5 (d,  $^4J_{\text{C-F}} = 3.2$  Hz), 128.9 (d,  $^3J_{\text{C-F}} = 8.0$  Hz), 124.3 (q,  $^1J_{\text{C-F}} = 283.9$  Hz), 115.6 (q,  $^2J_{\text{C-F}} = 21.3$  Hz), 76.4 (q,  $^2J_{\text{C-F}} = 29.9$  Hz), 61.1, 50.1, 43.3, 41.2, 39.0, 13.6;  $^{19}\text{F}$  NMR (376 MHz,  $\text{CDCl}_3$ )  $\delta$  (ppm): -81.5, -114.7; ESI-HRMS:  $[\text{M}+\text{H}]^+$  calcd. for  $\text{C}_{16}\text{H}_{17}\text{F}_4\text{O}_4$  349.1057, found 349.1055; 99% ee was determined by HPLC on AS-H column, hexane/*i*-propanol (70/30), 1.0 mL/min, UV 210 nm,  $t_{\text{major}} = 5.930$  min,  $t_{\text{minor}} = 13.833$  min;  $[\alpha]_{\text{D}}^{23} = -21.5^\circ$  ( $c = 0.130$ ,  $\text{CHCl}_3$ ).

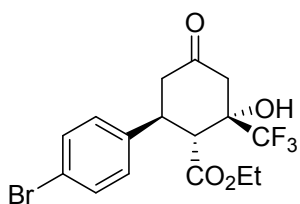

**Ethyl (1*R*, 2*S*, 6*S*)-6-(4-bromophenyl)-2-hydroxy-4-oxo-2-(trifluoromethyl)cyclohexane-1-carboxylate (3ag) (less polar):**

White solid; 44% yield purified by flash column chromatography (EtOAc/petroleum ether);  $^1\text{H}$  NMR (400 MHz,  $\text{CDCl}_3$ )  $\delta$  (ppm): 7.48 (d,  $J = 8.4$  Hz, 2H), 7.12 (d,  $J = 8.4$  Hz, 2H), 4.81 (d,  $J = 2.0$  Hz, 1H), 3.89 (q,  $J = 7.2$  Hz, 2H), 3.55 (td,  $J = 12.0, 5.6$  Hz, 1H), 3.21 (d,  $J = 12.0$  Hz, 1H), 2.82 (d,  $J = 15.2$  Hz, 1H), 2.68-2.58 (m, 3H), 0.88 (t,  $J = 7.0$  Hz, 3H);  $^{13}\text{C}$  NMR (100 MHz,  $\text{CDCl}_3$ )  $\delta$  (ppm): 202.2, 173.2, 137.7, 132.0, 129.3, 124.4 (q,  $^1J_{\text{C-F}} = 285.0$  Hz), 121.9, 76.4 (q,  $^2J_{\text{C-F}} = 29.0$  Hz), 61.9, 49.2, 46.9, 44.7, 42.3, 13.4;  $^{19}\text{F}$  NMR (376 MHz,  $\text{CDCl}_3$ )  $\delta$  (ppm): -81.4; ESI-HRMS:  $[\text{M}+\text{H}]^+$  calcd. for  $\text{C}_{16}\text{H}_{17}^{79}\text{BrF}_3\text{O}_4$

409.0257, found 409.0255; calcd. for  $C_{16}H_{17}^{81}BrF_3O_4$  411.0236, found 411.0233; 96% ee was determined by HPLC on AS-H column, hexane/*i*-propanol (80/20), 1.0 mL/min, UV 210 nm,  $t_{\text{minor}} = 10.237$  min,  $t_{\text{major}} = 13.597$  min;  $[\alpha]_D^{25} = -25.8^\circ$  ( $c = 0.260$ ,  $CHCl_3$ ).

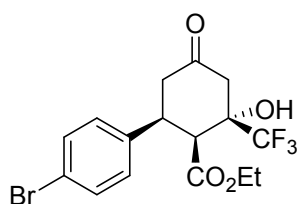

**Ethyl (1*S*, 2*S*, 6*S*)-6-(4-bromophenyl)-2-hydroxy-4-oxo-2-(trifluoromethyl)cyclohexane-1-carboxylate (3ag')** (more polar):

White solid; 53% yield purified by flash column chromatography (EtOAc/petroleum ether);  $^1H$  NMR (400 MHz,  $CDCl_3$ )  $\delta$  (ppm): 7.47 (d,  $J = 8.8$  Hz, 2H), 7.10 (d,  $J = 8.4$  Hz, 2H), 4.01-3.81 (m, 3H), 3.51 (t,  $J = 14.2$  Hz, 1H), 3.49 (d,  $J = 15.2$  Hz, 1H), 3.20 (d,  $J = 4.8$  Hz, 1H), 2.83 (s, 1H), 3.60 (d,  $J = 14.8$  Hz, 1H), 2.53 (dd,  $J = 14.4$ , 4.0 Hz, 1H), 0.98 (t,  $J = 7.2$  Hz, 3H);  $^{13}C$  NMR (100 MHz,  $CDCl_3$ )  $\delta$  (ppm): 207.6, 169.7, 137.7, 131.8, 129.0, 124.3 (q,  $^1J_{C-F} = 283.8$  Hz), 121.6, 76.4 (q,  $^2J_{C-F} = 29.8$  Hz), 61.2, 49.8, 43.2, 40.9, 39.2, 13.6;  $^{19}F$  NMR (376 MHz,  $CDCl_3$ )  $\delta$  (ppm): -81.4; ESI-HRMS:  $[M+H]^+$  calcd. for  $C_{16}H_{17}^{79}BrF_3O_4$  409.0257, found 409.0261; calcd. for  $C_{16}H_{17}^{81}BrF_3O_4$  411.0236, found 411.0256; 99% ee was determined by HPLC on AS-H column, hexane/*i*-propanol (90/10), 1.0 mL/min, UV 210 nm,  $t_{\text{major}} = 10.280$  min,  $t_{\text{minor}} = 20.227$  min;  $[\alpha]_D^{25} = 64.4^\circ$  ( $c = 0.246$ ,  $CHCl_3$ ).

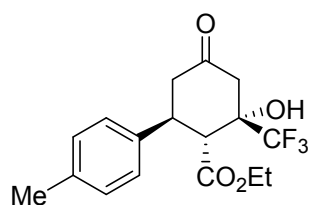

**Ethyl (1*R*, 2*S*, 6*S*)-2-hydroxy-4-oxo-6-(*p*-tolyl)-2-(trifluoromethyl)cyclohexane-1-carboxylate (3ah)** (less polar):

White solid; 45% yield purified by flash column chromatography (EtOAc/petroleum ether);  $^1H$  NMR (400 MHz,  $CDCl_3$ )  $\delta$  (ppm): 7.14 (d,  $J = 8.4$  Hz, 2H), 7.11 (d,  $J = 8.4$  Hz, 2H), 4.89 (br s, 1H), 3.86 (q,  $J = 7.2$  Hz, 2H), 3.52 (td,  $J = 12.0$ , 8.8 Hz, 1H), 3.22 (d,  $J = 12.0$  Hz, 1H), 2.81 (d,  $J = 14.8$  Hz, 1H), 2.66 (d,  $J = 9.2$  Hz, 2H), 2.61 (d,  $J = 15.2$  Hz, 1H), 2.33 (s, 3H), 0.83 (t,  $J = 7.2$  Hz, 3H);  $^{13}C$  NMR (100 MHz,  $CDCl_3$ )  $\delta$  (ppm): 202.9, 173.5, 137.8, 135.7, 129.5, 127.4, 124.5 (q,  $^1J_{C-F} = 285.2$  Hz), 76.5 (q,  $^2J_{C-F} = 29.0$  Hz), 61.7, 49.5, 47.2, 44.7, 42.5, 21.0, 13.3;  $^{19}F$  NMR (376 MHz,  $CDCl_3$ )  $\delta$  (ppm): -81.4; ESI-HRMS:  $[M+H]^+$  calcd. for  $C_{17}H_{20}F_3O_4$  345.1308, found 345.1304; 96% ee was determined by HPLC on AS-H column, hexane/*i*-propanol (80/20), 1.0 mL/min, UV 210 nm,  $t_{\text{minor}} = 9.570$  min,  $t_{\text{major}} = 13.937$  min;  $[\alpha]_D^{25} = -30.7^\circ$  ( $c = 0.296$ ,  $CHCl_3$ ).

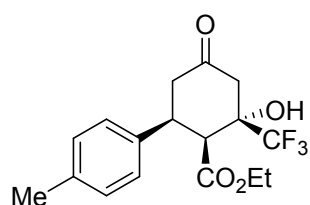

**Ethyl (1*S*, 2*S*, 6*S*)-2-hydroxy-4-oxo-6-(*p*-tolyl)-2-(trifluoromethyl)cyclohexane-1-carboxylate (3ah')** (more polar):



yield purified by flash column chromatography (EtOAc/petroleum ether);  $^1\text{H}$  NMR (400 MHz,  $\text{CDCl}_3$ )  $\delta$  (ppm): 7.12 (d,  $J = 8.0$  Hz, 2H), 7.08 (d,  $J = 8.0$  Hz, 2H), 3.98-3.80 (m, 4H), 3.56 (d,  $J = 14.4$  Hz, 1H), 3.49 (d,  $J = 14.4$  Hz, 1H), 3.23 (d,  $J = 4.0$  Hz, 1H), 2.65 (d,  $J = 14.8$  Hz, 1H), 2.53 (dd,  $J = 14.4, 3.6$  Hz, 1H), 2.32 (s, 3H), 0.94 (t,  $J = 7.2$  Hz, 3H);  $^{13}\text{C}$  NMR (100 MHz,  $\text{CDCl}_3$ )  $\delta$  (ppm): 207.8, 169.9, 137.3, 135.7, 129.3, 127.2, 124.4 (q,  $^1J_{\text{C-F}} = 284.2$  Hz), 76.5 (q,  $^2J_{\text{C-F}} = 30.0$  Hz), 60.9, 50.2, 43.3, 41.3, 39.4, 21.0, 13.6;  $^{19}\text{F}$  NMR (376 MHz,  $\text{CDCl}_3$ )  $\delta$  (ppm): -81.4; ESI-HRMS:  $[\text{M}+\text{H}]^+$  calcd. for  $\text{C}_{17}\text{H}_{20}\text{F}_3\text{O}_4$  345.1308, found 345.1309; 99% ee was determined by HPLC on AS-H column, hexane/*i*-propanol (90/10), 1.0 mL/min, UV 210 nm,  $t_{\text{major}} = 9.607$  min,  $t_{\text{minor}} = 20.573$  min;  $[\alpha]_{\text{D}}^{25} = 65.4^\circ$  ( $c = 0.246$ ,  $\text{CHCl}_3$ ).

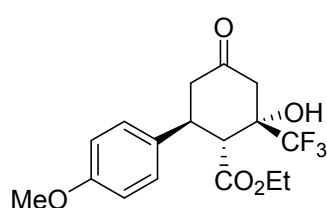

**Ethyl (1R, 2S, 6S)-2-hydroxy-6-(4-methoxyphenyl)-4-oxo-2-(trifluoromethyl)cyclohexane-1-carboxylate (3ai) (less polar):**

White solid; 41% yield purified by flash column chromatography (EtOAc/petroleum ether);  $^1\text{H}$  NMR (400 MHz,  $\text{CDCl}_3$ )  $\delta$  (ppm): 7.15 (d,  $J = 8.8$  Hz, 2H), 6.86 (d,  $J = 8.4$  Hz, 2H), 4.87 (d,  $J = 2.0$  Hz, 1H), 3.87 (q,  $J = 7.2$  Hz, 2H), 3.79 (s, 3H), 3.52 (dt,  $J = 11.6, 6.4$  Hz, 1H), 3.19 (d,  $J = 12.0$  Hz, 1H), 2.82 (d,  $J = 15.2$  Hz, 1H), 2.69-2.58 (m, 3H), 0.86 (t,  $J = 7.2$  Hz, 3H);  $^{13}\text{C}$  NMR (100 MHz,  $\text{CDCl}_3$ )  $\delta$  (ppm): 202.9, 173.5, 159.2, 130.7, 128.6, 124.5 (q,  $^1J_{\text{C-F}} = 285.2$  Hz), 114.2, 76.4 (q,  $^2J_{\text{C-F}} = 28.8$  Hz), 61.7, 55.3, 49.6, 47.4, 44.7, 42.1, 13.4;  $^{19}\text{F}$  NMR (376 MHz,  $\text{CDCl}_3$ )  $\delta$  (ppm): -81.4; ESI-HRMS:  $[\text{M}+\text{H}]^+$  calcd. for  $\text{C}_{17}\text{H}_{20}\text{F}_3\text{O}_5$  361.1257, found 361.1258; 98% ee was determined by HPLC on AS-H column, hexane/*i*-propanol (80/20), 1.0 mL/min, UV 210 nm,  $t_{\text{minor}} = 13.100$  min,  $t_{\text{major}} = 23.867$  min;  $[\alpha]_{\text{D}}^{25} = -31.1^\circ$  ( $c = 0.254$ ,  $\text{CHCl}_3$ ).

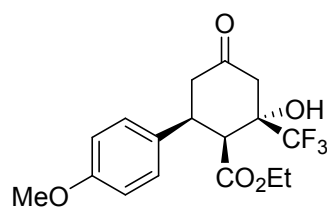

**Ethyl (1S, 2S, 6S)-2-hydroxy-6-(4-methoxyphenyl)-4-oxo-2-(trifluoromethyl)cyclohexane-1-carboxylate (3ai') (more polar):**

White solid; 41% yield purified by flash column chromatography (EtOAc/petroleum ether);  $^1\text{H}$  NMR (400 MHz,  $\text{CDCl}_3$ )  $\delta$  (ppm): 7.13 (d,  $J = 8.8$  Hz, 2H), 6.86 (d,  $J = 8.8$  Hz, 2H), 3.98-3.81 (m, 3H), 3.79 (s, 3H), 3.52 (t,  $J = 14.0$  Hz, 1H), 3.49 (d,  $J = 14.8$  Hz, 1H), 3.20 (d,  $J = 4.0$  Hz, 1H), 3.16 (br s, 1H), 2.61 (d,  $J = 14.4$  Hz, 1H), 2.53 (dd,  $J = 14.4, 4.4$  Hz, 1H), 0.97 (t,  $J = 7.2$  Hz, 3H);  $^{13}\text{C}$  NMR (100 MHz,  $\text{CDCl}_3$ )  $\delta$  (ppm): 207.9, 169.9, 158.9, 130.7, 128.3, 124.3 (q,  $^1J_{\text{C-F}} = 284.9$  Hz), 114.0, 76.4 (q,  $^2J_{\text{C-F}} = 28.7$

Hz), 61.0, 55.3, 50.2, 43.3, 41.4, 39.0, 13.6;  $^{19}\text{F}$  NMR (376 MHz,  $\text{CDCl}_3$ )  $\delta$  (ppm): -81.5; ESI-HRMS:  $[\text{M}+\text{H}]^+$  calcd. for  $\text{C}_{17}\text{H}_{20}\text{F}_3\text{O}_5$  361.1257, found 361.1256; 95% ee was determined by HPLC on AS-H column, hexane/*i*-propanol (80/20), 1.0 mL/min, UV 210 nm,  $t_{\text{major}} = 10.553$  min,  $t_{\text{minor}} = 14.653$  min;  $[\alpha]_{\text{D}}^{25} = 59.5^\circ$  ( $c = 0.242$ ,  $\text{CHCl}_3$ ).

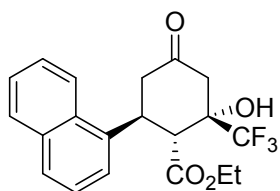

**Ethyl (1R, 2S, 6S)-2-hydroxy-6-(naphthalen-1-yl)-4-oxo-2-(trifluoromethyl)cyclohexane-1-carboxylate (3aj) (less polar):**

White solid; 59% yield purified by flash column chromatography (EtOAc/petroleum ether);  $^1\text{H}$  NMR (400 MHz,  $\text{CDCl}_3$ )  $\delta$  (ppm): 8.07 (d,  $J = 8.4$  Hz, 1H), 7.86 (d,  $J = 8.0$  Hz, 1H), 7.80 (d,  $J = 8.4$  Hz, 1H), 7.61 (d,  $J = 6.8$  Hz, 1H), 7.56-7.49 (m, 3H), 4.95 (d,  $J = 2.0$  Hz, 1H), 4.63 (td,  $J = 12.6, 4.4$  Hz, 1H), 3.69 (q,  $J = 7.0$  Hz, 2H), 3.54 (d,  $J = 12.0$  Hz, 1H), 2.92 (dd,  $J = 15.0, 1.8$  Hz, 1H), 2.81 (ddd,  $J = 15.0, 4.2, 2.0$  Hz, 1H), 2.72 (dd,  $J = 14.8, 2.4$  Hz, 1H), 2.70 (d,  $J = 13.6$  Hz, 1H), 0.61 (t,  $J = 7.2$  Hz, 3H);  $^{13}\text{C}$  NMR (100 MHz,  $\text{CDCl}_3$ )  $\delta$  (ppm): 202.9, 173.3, 135.1, 133.9, 130.9, 128.8, 128.3, 127.4 (q,  $^1J_{\text{C-F}} = 285.4$  Hz), 126.7, 126.0, 125.1, 124.3, 122.3, 76.7 (q,  $^2J_{\text{C-F}} = 28.9$  Hz), 61.8, 48.8, 47.7, 44.8, 35.8, 13.1;  $^{19}\text{F}$  NMR (376 MHz,  $\text{CDCl}_3$ )  $\delta$  (ppm): -81.3; ESI-HRMS:  $[\text{M}+\text{H}]^+$  calcd. for  $\text{C}_{20}\text{H}_{20}\text{F}_3\text{O}_4$  381.1308, found 381.1309; 92% ee was determined by HPLC on AS-H column, hexane/*i*-propanol (80/20), 1.0 mL/min, UV 210 nm,  $t_{\text{major}} = 8.283$  min,  $t_{\text{minor}} = 11.070$  min;  $[\alpha]_{\text{D}}^{25} = 6.4^\circ$  ( $c = 0.264$ ,  $\text{CHCl}_3$ ).

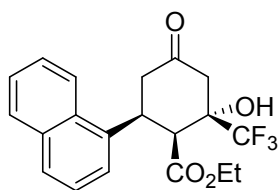

**Ethyl (1S, 2S, 6S)-2-hydroxy-6-(naphthalen-1-yl)-4-oxo-2-(trifluoromethyl)cyclohexane-1-carboxylate (3aj') (more polar):**

White solid; 40% yield purified by flash column chromatography (EtOAc/petroleum ether);  $^1\text{H}$  NMR (400 MHz,  $\text{CDCl}_3$ )  $\delta$  (ppm): 8.07 (d,  $J = 8.4$  Hz, 1H), 7.89 (d,  $J = 8.0$  Hz, 1H), 7.80 (d,  $J = 8.4$  Hz, 1H), 7.58 (t,  $J = 7.6$  Hz, 1H), 7.52 (t,  $J = 7.4$  Hz, 1H), 7.42 (t,  $J = 7.6$  Hz, 1H), 7.29 (d,  $J = 7.2$  Hz, 1H), 4.80 (dt,  $J = 13.6, 4.0$  Hz, 1H), 3.90-3.74 (m, 4H), 3.65 (d,  $J = 14.8$  Hz, 2H), 3.48 (d,  $J = 3.6$  Hz, 1H), 2.75 (dd,  $J = 14.8, 1.6$  Hz, 1H), 2.60 (dd,  $J = 14.0, 3.6$  Hz, 1H), 0.77 (t,  $J = 7.2$  Hz, 3H);  $^{13}\text{C}$  NMR (100 MHz,  $\text{CDCl}_3$ )  $\delta$  (ppm): 208.6, 169.8, 134.2, 133.9, 130.9, 129.1, 128.3, 126.9, 125.8, 125.0, 124.4 (q,  $^1J_{\text{C-F}} = 283.8$  Hz), 123.5, 122.2, 76.7 (q,  $^2J_{\text{C-F}} = 29.8$  Hz), 60.8, 48.5, 43.9, 41.4, 34.7, 13.5;  $^{19}\text{F}$  NMR (376 MHz,  $\text{CDCl}_3$ )  $\delta$  (ppm): -81.3; ESI-HRMS:  $[\text{M}+\text{H}]^+$  calcd. for  $\text{C}_{20}\text{H}_{20}\text{F}_3\text{O}_4$  381.1308, found 381.1307; 95% ee was determined by HPLC on AS-H column, hexane/*i*-propanol (80/20), 1.0 mL/min, UV 210 nm,  $t_{\text{major}}$

= 5.920 min,  $t_{\text{minor}} = 7.757$  min;  $[\alpha]_{\text{D}}^{25} = -121.6^{\circ}$  ( $c = 0.334$ ,  $\text{CHCl}_3$ ).

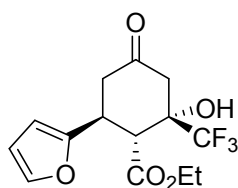

**Ethyl (1R, 2S, 6S)-6-(furan-2-yl)-2-hydroxy-4-oxo-2-(trifluoromethyl)cyclohexane-1-carboxylate (3ak) (less polar):** White solid; 46% yield

purified by flash column chromatography (EtOAc/petroleum ether);  $^1\text{H}$  NMR (400 MHz,  $\text{CDCl}_3$ )  $\delta$  (ppm): 7.39 (d,  $J = 1.2$  Hz, 1H), 6.29 (dd,  $J =$

3.2, 2.0 Hz, 1H), 6.12 (d,  $J = 3.2$  Hz, 1H), 4.86 (d,  $J = 2.4$  Hz, 1H), 4.03 (q,  $J = 7.2$  Hz, 2H), 3.71 (dt,  $J = 12.4, 4.4$  Hz, 1H), 3.31 (d,  $J = 12.0$  Hz, 1H), 2.84-2.77 (m, 2H), 2.70 (ddd,  $J = 15.2, 4.6, 2.0$  Hz, 1H), 2.58 (dd,  $J = 15.2, 2.8$  Hz, 1H), 1.07 (t,  $J = 7.0$  Hz, 3H);  $^{13}\text{C}$  NMR (100 MHz,  $\text{CDCl}_3$ )  $\delta$  (ppm): 202.3, 173.6, 151.7, 142.7, 124.4 (q,  $^1J_{\text{C-F}} = 285.2$  Hz), 110.2, 107.3, 76.1 (q,  $^2J_{\text{C-F}} = 29.0$  Hz), 62.0, 47.8, 44.6, 44.2, 36.5, 13.6;  $^{19}\text{F}$  NMR (376 MHz,  $\text{CDCl}_3$ )  $\delta$  (ppm): -81.3; ESI-HRMS:  $[\text{M}+\text{H}]^+$  calcd. for  $\text{C}_{14}\text{H}_{16}\text{F}_3\text{O}_5$  321.0944, found 321.0948; 96% ee was determined by HPLC on AS-H column, hexane/*i*-propanol (90/10), 1.0 mL/min, UV 210 nm,  $t_{\text{minor}} = 10.600$  min,  $t_{\text{major}} = 12.030$  min;  $[\alpha]_{\text{D}}^{25} = -37.7^{\circ}$  ( $c = 0.236$ ,  $\text{CHCl}_3$ ).

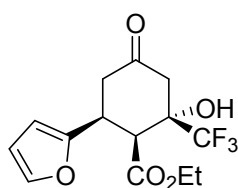

**Ethyl (1S, 2S, 6S)-6-(furan-2-yl)-2-hydroxy-4-oxo-2-(trifluoromethyl)cyclohexane-1-carboxylate (3ak') (more polar):** White solid; 50% yield

purified by flash column chromatography (EtOAc/petroleum ether);  $^1\text{H}$  NMR (400 MHz,  $\text{CDCl}_3$ )  $\delta$  (ppm): 7.36 (app s, 1H), 6.30 (t,  $J = 2.0$  Hz,

1H), 6.09 (d,  $J = 3.2$  Hz, 1H), 4.01 (q,  $J = 7.2$  Hz, 2H), 3.94 (dt,  $J = 13.6, 4.4$  Hz, 1H), 3.47 (d,  $J = 15.2$  Hz, 1H), 3.43 (dd,  $J = 4.8$  Hz, 1H), 3.33 (d,  $J = 14.4$  Hz, 1H), 3.29 (d,  $J = 14.4$  Hz, 1H), 2.63 (d,  $J = 14.8$  Hz, 2H), 1.08 (t,  $J = 7.2$  Hz, 3H);  $^{13}\text{C}$  NMR (100 MHz,  $\text{CDCl}_3$ )  $\delta$  (ppm): 206.5, 169.7, 152.8, 142.1, 124.3 (q,  $J_{\text{C-F}} = 283.4$  Hz), 110.2, 106.4, 76.2 (q,  $J_{\text{C-F}} = 31.5$  Hz), 61.2, 47.4, 43.3, 40.0, 34.1, 13.7;  $^{19}\text{F}$  NMR (376 MHz,  $\text{CDCl}_3$ )  $\delta$  (ppm): -81.5; ESI-HRMS:  $[\text{M}+\text{H}]^+$  calcd. for  $\text{C}_{14}\text{H}_{16}\text{F}_3\text{O}_5$  321.0944, found 321.0947; 99% ee was determined by HPLC on AS-H column, hexane/*i*-propanol (90/10), 1.0 mL/min, UV 210 nm,  $t_{\text{minor}} = 4.810$  min,  $t_{\text{major}} = 6.150$  min;  $[\alpha]_{\text{D}}^{25} = -60.4^{\circ}$  ( $c = 0.264$ ,  $\text{CHCl}_3$ ).

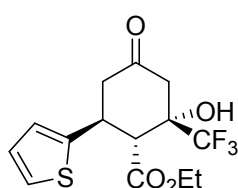

**Ethyl (1R, 2S, 6S)-2-hydroxy-4-oxo-6-(thiophen-2-yl)-2-(trifluoromethyl)cyclohexane-1-carboxylate (3al) (less polar):** White

solid; 44% yield purified by flash column chromatography (EtOAc/petroleum ether);  $^1\text{H}$  NMR (400 MHz,  $\text{CDCl}_3$ )  $\delta$  (ppm): 7.26 (d,  $J$

= 4.4 Hz, 1H), 6.94 (dd,  $J = 4.8, 3.6$  Hz, 1H), 6.89 (d,  $J = 3.6$  Hz, 1H), 4.84 (d,  $J = 2.4$  Hz, 1H), 4.02-3.90 (m, 3H), 3.19 (d,  $J = 12.0$  Hz, 1H), 2.87-2.81 (m, 2H), 2.70 (d,  $J = 14.0$  Hz, 2H), 2.61 (dd,  $J = 15.2, 2.4$  Hz, 1H), 0.97 (t,  $J = 7.0$  Hz, 3H);  $^{13}\text{C}$  NMR (100 MHz,  $\text{CDCl}_3$ )  $\delta$  (ppm): 201.8, 173.3, 142.3, 126.7, 125.7, 125.0, 124.3 (q,  $^1J_{\text{C-F}} = 285.2$  Hz), 76.1 (q,  $^2J_{\text{C-F}} = 29.2$  Hz), 61.9, 51.0, 48.0, 44.6, 38.3, 13.4;  $^{19}\text{F}$  NMR (376 MHz,  $\text{CDCl}_3$ )  $\delta$  (ppm): -81.2; ESI-HRMS:  $[\text{M}+\text{H}]^+$  calcd. for  $\text{C}_{14}\text{H}_{16}\text{F}_3\text{O}_4\text{S}$  337.0716, found 337.0718; 94% ee was determined by HPLC on AS-H column, hexane/*i*-propanol (80/20), 1.0 mL/min, UV 210 nm,  $t_{\text{minor}} = 12.353$  min,  $t_{\text{major}} = 14.537$  min;  $[\alpha]_{\text{D}}^{25} = -15.6^\circ$  ( $c = 0.256$ ,  $\text{CHCl}_3$ ).

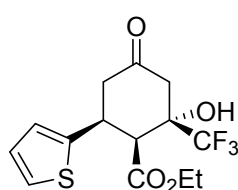

**Ethyl (1*S*, 2*S*, 6*S*)-2-hydroxy-4-oxo-6-(thiophen-2-yl)-2-(trifluoromethyl)cyclohexane-1-carboxylate (3al')** (more polar): White solid; 44% yield purified by flash column chromatography (EtOAc/petroleum ether);

$^1\text{H}$  NMR (400 MHz,  $\text{CDCl}_3$ )  $\delta$  (ppm): 7.22 (d,  $J = 5.2$  Hz, 1H), 6.95 (t,  $J = 4.4$  Hz, 1H), 6.89 (d,  $J = 2.8$  Hz, 1H), 4.14 (td,  $J = 13.2, 4.6$  Hz, 1H), 4.03-3.96 (m, 2H), 3.55-3.44 (m, 3H), 3.35 (d,  $J = 3.6$  Hz, 1H), 2.71 (dd,  $J = 14.4, 3.6$  Hz, 1H), 2.62 (d,  $J = 13.4$  Hz, 1H), 1.04 (t,  $J = 7.2$  Hz, 3H);  $^{13}\text{C}$  NMR (100 MHz,  $\text{CDCl}_3$ )  $\delta$  (ppm): 207.0, 169.8, 142.3, 126.8, 124.7, 124.5, 124.2 (q,  $^1J_{\text{C-F}} = 284.0$  Hz), 76.2 (q,  $^2J_{\text{C-F}} = 30.0$  Hz), 61.3, 50.3, 43.1, 42.7, 35.6, 13.6;  $^{19}\text{F}$  NMR (376 MHz,  $\text{CDCl}_3$ )  $\delta$  (ppm): -81.4; ESI-HRMS:  $[\text{M}+\text{H}]^+$  calcd. for  $\text{C}_{14}\text{H}_{16}\text{F}_3\text{O}_4\text{S}$  337.0716, found 337.0719; 98% ee was determined by HPLC on AS-H column, hexane/*i*-propanol (90/10), 1.0 mL/min, UV 210 nm,  $t_{\text{minor}} = 5.110$  min,  $t_{\text{major}} = 5.883$  min;  $[\alpha]_{\text{D}}^{25} = 33.2^\circ$  ( $c = 0.226$ ,  $\text{CHCl}_3$ ).

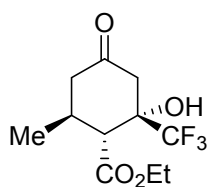

**Ethyl (1*R*, 2*S*, 6*S*)-2-hydroxy-6-methyl-4-oxo-2-(trifluoromethyl)cyclohexane-1-carboxylate (3am)** (less polar): White solid; 45% yield purified by flash column chromatography (EtOAc/petroleum ether);  $^1\text{H}$  NMR

(400 MHz,  $\text{CDCl}_3$ )  $\delta$  (ppm): 4.68 (d,  $J = 2.8$  Hz, 1H), 4.32-4.24 (m, 2H), 2.74-2.69 (m, 2H), 2.55-2.43 (m, 3H), 2.13 (t,  $J = 14.8$  Hz, 1H), 1.33 (t,  $J = 7.0$  Hz, 3H), 1.07 (d,  $J = 6.4$  Hz, 3H);  $^{13}\text{C}$  NMR (100 MHz,  $\text{CDCl}_3$ )  $\delta$  (ppm): 203.3, 174.3, 124.5 (q,  $^1J_{\text{C-F}} = 285.2$  Hz), 76.5 (q,  $^2J_{\text{C-F}} = 28.8$  Hz), 62.1, 49.8, 47.5, 44.6, 31.7, 19.5, 13.9;  $^{19}\text{F}$  NMR (376 MHz,  $\text{CDCl}_3$ )  $\delta$  (ppm): -81.4; ESI-HRMS:  $[\text{M}+\text{H}]^+$  calcd. for  $\text{C}_{11}\text{H}_{16}\text{F}_3\text{O}_4$  269.0995, found 269.0991; after derivation to compound **6m**, 99% ee was determined by HPLC on IC-H column, hexane/*i*-propanol (90/10), 1.0 mL/min, UV 210 nm,  $t_{\text{major}} = 7.023$  min,  $t_{\text{minor}} = 11.190$  min;  $[\alpha]_{\text{D}}^{25} = 12.1^\circ$

( $c = 0.240$ ,  $\text{CHCl}_3$ ).

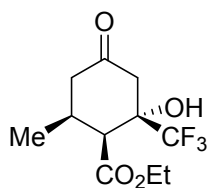

**Ethyl (1S, 2S, 6S)-2-hydroxy-6-methyl-4-oxo-2-(trifluoromethyl)cyclohexane-1-carboxylate (3am') (more polar):** White solid; 50% yield

purified by flash column chromatography (EtOAc/petroleum ether);  $^1\text{H}$  NMR (400 MHz,  $\text{CDCl}_3$ )  $\delta$  (ppm): 4.19 (q,  $J = 6.8$  Hz, 2H), 4.04 (br s, 1H), 3.29 (d,  $J = 14.8$  Hz, 1H), 2.97 (d,  $J = 3.6$  Hz, 1H), 2.78-2.62 (m, 2H), 2.53 (d,  $J = 14.8$  Hz, 1H), 2.27 (d,  $J = 12.0$  Hz, 1H), 1.28 (t,  $J = 7.2$  Hz, 3H), 1.02 (d,  $J = 6.8$  Hz, 3H);  $^{13}\text{C}$  NMR (100 MHz,  $\text{CDCl}_3$ )  $\delta$  (ppm): 208.1, 170.4, 124.4 (q,  $^1J_{\text{C-F}} = 283.8$  Hz), 76.4 (q,  $^2J_{\text{C-F}} = 29.7$  Hz), 61.2, 48.5, 44.1, 42.9, 29.5, 18.2, 14.0;  $^{19}\text{F}$  NMR (376 MHz,  $\text{CDCl}_3$ )  $\delta$  (ppm): -81.7; ESI-HRMS:  $[\text{M}+\text{H}]^+$  calcd. for  $\text{C}_{11}\text{H}_{16}\text{F}_3\text{O}_4$  269.0995, found 269.0996; after derivation to compound **6m'**, 99% ee was determined by HPLC on OD-H column, hexane/*i*-propanol (95/5), 1.0 mL/min, UV 210 nm,  $t_{\text{minor}} = 6.243$  min,  $t_{\text{major}} = 12.167$  min;  $[\alpha]_{\text{D}}^{25} = -7.6^\circ$  ( $c = 0.170$ ,  $\text{CHCl}_3$ ).

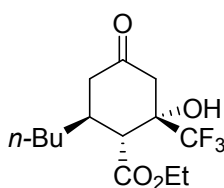

**Ethyl (1R, 2S, 6S)-6-butyl-2-hydroxy-4-oxo-2-(trifluoromethyl)cyclohexane-1-carboxylate (3an) (less polar):** White solid; 47% yield

purified by flash column chromatography (EtOAc/petroleum ether);  $^1\text{H}$  NMR (400 MHz,  $\text{CDCl}_3$ )  $\delta$  (ppm): 4.66 (br s, 1H), 4.27 (q,  $J = 7.2$  Hz, 2H), 2.82 (d,  $J = 11.6$  Hz, 1H), 2.70 (d,  $J = 14.8$  Hz, 1H), 2.60 (dd,  $J = 14.4, 2.4$  Hz, 1H), 2.46 (d,  $J = 15.2$  Hz, 1H), 2.41-2.38 (m, 1H), 2.07 (t,  $J = 13.8$  Hz, 1H), 1.37-1.24 (m, 9H), 0.88 (t,  $J = 6.6$  Hz, 3H);  $^{13}\text{C}$  NMR (100 MHz,  $\text{CDCl}_3$ )  $\delta$  (ppm): 203.7, 174.4, 124.5 (q,  $^1J_{\text{C-F}} = 285.2$  Hz), 76.5 (q,  $^2J_{\text{C-F}} = 28.7$  Hz), 62.0, 48.5, 44.7, 44.5, 35.9, 33.0, 27.4, 22.4, 13.8, 13.7;  $^{19}\text{F}$  NMR (376 MHz,  $\text{CDCl}_3$ )  $\delta$  (ppm): -81.4; ESI-HRMS:  $[\text{M}+\text{H}]^+$  calcd. for  $\text{C}_{14}\text{H}_{22}\text{F}_3\text{O}_4$  311.1465, found 311.1469; after derivation to compound **6n**, 95% ee was determined by HPLC on IC-H column, hexane/*i*-propanol (90/10), 1.0 mL/min, UV 210 nm,  $t_{\text{major}} = 5.743$  min,  $t_{\text{minor}} = 9.017$  min;  $[\alpha]_{\text{D}}^{25} = -7.0^\circ$  ( $c = 0.242$ ,  $\text{CHCl}_3$ ).

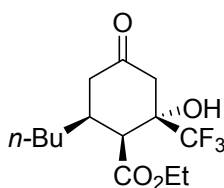

**Ethyl (1S, 2S, 6S)-6-butyl-2-hydroxy-4-oxo-2-(trifluoromethyl)cyclohexane-1-carboxylate (3an') (more polar):** White solid; 52% yield

purified by flash column chromatography (EtOAc/petroleum ether);  $^1\text{H}$  NMR (400 MHz,  $\text{CDCl}_3$ )  $\delta$  (ppm): 4.21 (q,  $J = 7.2$  Hz, 2H), 3.56 (br s, 1H), 3.34 (d,  $J = 14.8$  Hz, 1H), 3.06 (d,  $J = 4.0$  Hz, 1H), 2.73 (t,  $J = 13.8$  Hz, 1H), 2.55-2.49 (m, 2H),

2.35 (dd,  $J = 15.0, 4.2$  Hz, 1H), 1.35-1.25 (m, 9H), 0.89 (t,  $J = 6.8$  Hz, 3H);  $^{13}\text{C}$  NMR (100 MHz,  $\text{CDCl}_3$ )  $\delta$  (ppm): 208.2, 170.4, 124.5 (q,  $^1J_{\text{C-F}} = 284.0$  Hz), 76.4 (q,  $^2J_{\text{C-F}} = 29.7$  Hz), 61.1, 47.0, 43.3, 42.8, 34.6, 32.8, 28.8, 22.5, 14.0, 13.8;  $^{19}\text{F}$  NMR (376 MHz,  $\text{CDCl}_3$ )  $\delta$  (ppm): -81.6; ESI-HRMS:  $[\text{M}+\text{H}]^+$  calcd. for  $\text{C}_{14}\text{H}_{22}\text{F}_3\text{O}_4$  311.1465, found 311.1466; after derivation to compound **6n'**, 99% ee was determined by HPLC on OD-H column, hexane/*i*-propanol (95/5), 1.0 mL/min, UV 254 nm,  $t_{\text{minor}} = 5.090$  min,  $t_{\text{major}} = 10.680$  min;  $[\alpha]_{\text{D}}^{25} = -4.9^\circ$  ( $c = 1.072$ ,  $\text{CHCl}_3$ ).

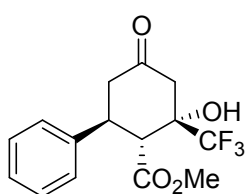

**Methyl (1R, 2S, 6S)-2-hydroxy-4-oxo-6-phenyl-2-(trifluoromethyl)**

**cyclohexane-1-carboxylate (3bb) (less polar):** White solid; 58% yield

purified by flash column chromatography (EtOAc/petroleum ether);  $^1\text{H}$

NMR (400 MHz,  $\text{CDCl}_3$ )  $\delta$  (ppm): 7.36-7.29 (m, 3H), 7.22 (d,  $J = 7.2$  Hz,

2H), 4.77 (br s, 1H), 3.61-3.54 (m, 1H), 3.37 (s, 3H), 3.27 (d,  $J = 12.0$  Hz, 1H), 2.83 (d,  $J = 14.8$  Hz, 1H), 2.69 (d,  $J = 9.2$  Hz, 2H), 2.63 (dd,  $J = 14.8, 2.0$  Hz, 1H);  $^{13}\text{C}$  NMR (100 MHz,  $\text{CDCl}_3$ )  $\delta$  (ppm): 214.0, 202.8, 138.7, 129.4, 128.3, 127.5, 124.7 (q,  $^1J_{\text{C-F}} = 285.4$  Hz), 77.6 (q,  $J = 28.8$  Hz), 53.9, 46.8, 45.1, 43.7, 33.4;  $^{19}\text{F}$  NMR (376 MHz,  $\text{CDCl}_3$ )  $\delta$  (ppm): -81.5; ESI-HRMS:  $[\text{M}+\text{H}]^+$  calcd. for  $\text{C}_{15}\text{H}_{16}\text{F}_3\text{O}_4$  317.0995, found 317.0999; 94% ee was determined by HPLC on AS-H column, hexane/*i*-propanol (80/20), 1.0 mL/min, UV 210 nm,  $t_{\text{minor}} = 12.403$  min,  $t_{\text{major}} = 18.223$  min;  $[\alpha]_{\text{D}}^{25} = -41.3^\circ$  ( $c = 0.092$ ,  $\text{CHCl}_3$ ).

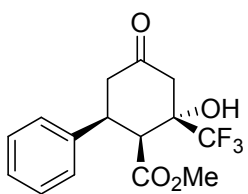

**Ethyl (1S, 2S, 6S)-2-hydroxy-4-oxo-6-phenyl-2-(trifluoromethyl)**

**cyclohexane-1-carboxylate (3bb') (more polar):** White solid; 41% yield

purified by flash column chromatography (EtOAc/petroleum ether);  $^1\text{H}$

NMR (400 MHz,  $\text{CDCl}_3$ )  $\delta$  (ppm): 7.34 (t,  $J = 7.2$  Hz, 2H), 7.29 (t,  $J = 7.2$

Hz, 1H), 7.20 (d,  $J = 7.6$  Hz, 2H), 3.88 (dt,  $J = 14.0, 4.4$  Hz, 1H), 3.56 (t,  $J = 14.2$  Hz, 2H), 3.50 (d,  $J = 14.8$  Hz, 1H), 3.43 (s, 3H), 3.26 (d,  $J = 4.0$  Hz, 1H), 2.65 (d,  $J = 14.8$  Hz, 1H), 2.55 (dd,  $J = 14.4, 4.0$  Hz);  $^{13}\text{C}$  NMR (100 MHz,  $\text{DMSO-d}_6$ )  $\delta$  (ppm): 205.3, 170.1, 139.3, 128.6, 127.4, 127.1, 124.9 (q,  $^1J_{\text{C-F}} = 285.1$  Hz), 75.2 (q,  $^2J_{\text{C-F}} = 28.6$  Hz), 51.7, 49.9, 42.2, 40.4, 38.6;  $^{19}\text{F}$  NMR (376 MHz,  $\text{CDCl}_3$ )  $\delta$  (ppm): -81.7; ESI-HRMS:  $[\text{M}+\text{H}]^+$  calcd. for  $\text{C}_{15}\text{H}_{16}\text{F}_3\text{O}_4$  317.0995, found 317.0998; 98% ee was determined by HPLC on AS-H column, hexane/*i*-propanol (80/20), 1.0 mL/min, UV 210 nm,  $t_{\text{major}} = 8.377$  min,  $t_{\text{minor}} = 17.613$  min;  $[\alpha]_{\text{D}}^{25} = 71.2^\circ$  ( $c = 0.198$ ,  $\text{CHCl}_3$ ).

### 3. General procedure for the cascade Michael/aldol condensation

Ethyl 4,4,4-trifluoroacetoacetate **2a** (19.0  $\mu$ L, 0.13 mmol),  $\beta$ -naphthyl-substituted cinnamone **1a** (19.6 mg, 0.1 mmol), quinine-derived **C1** (6.5 mg, 0.02 mmol) and trifluoroacetic acid (3.0  $\mu$ L, 0.04 mmol) were successively added to a 4 mL vial. After dissolved in toluene (1 mL), the resulting mixture was stirred at 40  $^{\circ}$ C for due time, and then the reaction mixture was directly subjected to flash column chromatography on silica gel (EtOAc/petroleum ether) to afford the corresponding products **3** and **4**.

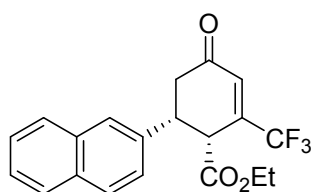

**Ethyl (1R, 6R)-6-(naphthalen-2-yl)-4-oxo-2-(trifluoromethyl)cyclohex-2-ene-1-carboxylate (4aa):** Colourless oil; 52% yield purified by flash column chromatography (EtOAc/petroleum ether);  $^1\text{H}$  NMR (400 MHz,  $\text{CDCl}_3$ )  $\delta$  (ppm): 7.87-7.80 (m, 3H), 7.63 (s, 1H), 7.53-7.48 (m, 2H), 7.36 (dd,  $J = 8.4, 1.8$  Hz, 1H), 6.65 (s, 1H), 3.91-3.83 (m, 1H), 3.78-3.70 (m, 1H), 3.62 (dd,  $J = 16.6, 14.2$  Hz, 1H), 2.78 (dd,  $J = 16.8, 3.6$  Hz, 1H), 0.71 (t,  $J = 7.0$  Hz, 3H);  $^{13}\text{C}$  NMR (100 MHz,  $\text{CDCl}_3$ )  $\delta$  (ppm): 197.2, 168.2, 143.0 (q,  $^2J_{\text{C-F}} = 31.0$  Hz), 135.8, 133.2, 132.8, 130.4 (q,  $^3J_{\text{C-F}} = 4.8$  Hz), 128.5, 127.8, 127.6, 126.5, 126.3, 125.7, 125.3, 122.5 (q,  $^1J_{\text{C-F}} = 272.9$  Hz), 62.8, 61.6, 46.1, 42.6, 37.6, 13.4;  $^{19}\text{F}$  NMR (376 MHz,  $\text{CDCl}_3$ )  $\delta$  (ppm): -69.4; ESI-HRMS:  $[\text{M}+\text{H}]^+$  calcd. for  $\text{C}_{20}\text{H}_{18}\text{F}_3\text{O}_3$  363.1203, found 363.1206; 89% ee was determined by HPLC on OD-H column, hexane/*i*-propanol (70/30), 1.0 mL/min, UV 254 nm,  $t_{\text{major}} = 8.450$  min,  $t_{\text{minor}} = 21.387$  min;  $[\alpha]_{\text{D}}^{25} = -30.6^{\circ}$  ( $c = 0.098$ ,  $\text{CHCl}_3$ ).

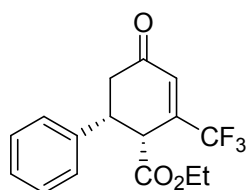

**Ethyl (1R, 2R)-5-oxo-3-(trifluoromethyl)-1,2,5,6-tetrahydro-[1,1'-biphenyl]-2-carboxylate (4ab):** Colourless oil; 58% yield purified by flash column chromatography (EtOAc/petroleum ether);  $^1\text{H}$  NMR (400 MHz,  $\text{CDCl}_3$ )  $\delta$  (ppm): 7.39-7.30 (m, 3H), 7.22 (d,  $J = 6.8$  Hz, 2H), 6.61 (s, 1H), 3.97-3.89 (m, 2H), 3.87-3.79 (m, 1H), 3.76-3.69 (m, 2H), 3.53-3.44 (m, 1H), 2.67 (dd,  $J = 16.8, 3.6$  Hz, 1H), 0.89 (t,  $J = 7.2$  Hz, 3H);  $^{13}\text{C}$  NMR (100 MHz,  $\text{CDCl}_3$ )  $\delta$  (ppm): 197.2, 168.1, 142.9 (q,  $^2J_{\text{C-F}} = 31.8$  Hz), 138.3, 130.3 (q,  $^3J_{\text{C-F}} = 4.8$  Hz), 128.7, 128.0, 127.1, 122.4 (q,  $^1J_{\text{C-F}} = 272.9$  Hz), 61.5, 46.2, 42.4, 37.4, 13.5;  $^{19}\text{F}$  NMR (376 MHz,  $\text{CDCl}_3$ )  $\delta$  (ppm): -69.5; ESI-HRMS:  $[\text{M}+\text{H}]^+$  calcd. for  $\text{C}_{16}\text{H}_{16}\text{F}_3\text{O}_3$  313.1046, found 313.1048; 92% ee was determined by HPLC on OD-H column, hexane/*i*-propanol (80/20), 1.0 mL/min, UV 210 nm,  $t_{\text{major}} = 7.876$  min,  $t_{\text{minor}} =$

12.867 min;  $[\alpha]_{\text{D}}^{25} = -15.9^\circ$  ( $c = 0.434$ ,  $\text{CHCl}_3$ ).

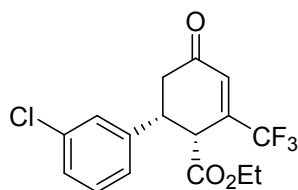

**Ethyl (1R, 2R)-3'-chloro-5-oxo-3-(trifluoromethyl)-1,2,5,6-tetrahydro-[1,1'-biphenyl]-2-carboxylate (4ad):** Colourless oil; 51% yield purified by flash column chromatography (EtOAc/petroleum ether);  $^1\text{H NMR}$  (400 MHz,  $\text{CDCl}_3$ )  $\delta$  (ppm): 7.31 (d,  $J = 4.8$  Hz, 2H), 7.21 (s, 1H), 7.14-7.09 (m, 1H), 6.61 (s, 1H), 4.01-3.95 (m, 1H), 3.93-3.86 (m, 1H), 3.72-3.66 (m, 2H), 3.47-3.38 (m, 1H), 2.66 (dd,  $J = 16.6, 3.4$  Hz, 1H), 0.95 (t,  $J = 7.0$  Hz, 3H);  $^{13}\text{C NMR}$  (100 MHz,  $\text{CDCl}_3$ )  $\delta$  (ppm): 196.5, 167.9, 142.7 ( $q, {}^2J_{\text{C-F}} = 32.0$  Hz), 140.4, 134.7, 130.3 ( $q, {}^3J_{\text{C-F}} = 4.8$  Hz), 130.1, 128.2, 127.4, 125.4, 122.3 ( $q, {}^1J_{\text{C-F}} = 273.0$  Hz), 61.8, 45.9, 42.1, 37.3, 13.6;  $^{19}\text{F NMR}$  (376 MHz,  $\text{CDCl}_3$ )  $\delta$  (ppm): -69.4; ESI-HRMS:  $[\text{M}+\text{H}]^+$  calcd. for  $\text{C}_{16}\text{H}_{15}^{35}\text{ClF}_3\text{O}_3$  347.0656, found 347.0659; calcd. for  $\text{C}_{16}\text{H}_{15}^{37}\text{ClF}_3\text{O}_3$  349.0627, found 347.0629; 96% ee was determined by HPLC on OJ-H column, hexane/*i*-propanol (80/20), 1.0 mL/min, UV 210 nm,  $t_{\text{major}} = 7.760$  min,  $t_{\text{minor}} = 10.320$  min;  $[\alpha]_{\text{D}}^{25} = -31.8^\circ$  ( $c = 0.088$ ,  $\text{CHCl}_3$ ).

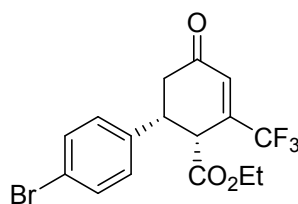

**Ethyl (1R, 2R)-4'-bromo-5-oxo-3-(trifluoromethyl)-1,2,5,6-tetrahydro-[1,1'-biphenyl]-2-carboxylate (4ag):** Colourless oil; 55% yield purified by flash column chromatography (EtOAc/petroleum ether);  $^1\text{H NMR}$  (400 MHz,  $\text{CDCl}_3$ )  $\delta$  (ppm): 7.50 (d,  $J = 8.4$  Hz, 2H), 7.10 (d,  $J = 8.4$  Hz, 2H), 6.60 (s, 1H), 4.01-3.93 (m, 1H), 3.90-3.82 (m, 1H), 3.71-3.65 (m, 2H), 3.47-3.38 (m, 1H), 2.64 (dd,  $J = 16.0, 3.2$  Hz, 1H), 0.95 (t,  $J = 7.2$  Hz, 3H);  $^{13}\text{C NMR}$  (100 MHz,  $\text{CDCl}_3$ )  $\delta$  (ppm): 196.6, 167.9, 142.8 ( $q, {}^2J_{\text{C-F}} = 32.0$  Hz), 137.4, 131.9, 130.3 ( $q, {}^3J_{\text{C-F}} = 4.7$  Hz), 128.8, 122.3 ( $q, {}^1J_{\text{C-F}} = 273.0$  Hz), 122.0, 61.8, 45.9, 41.9, 37.3, 13.6;  $^{19}\text{F NMR}$  (376 MHz,  $\text{CDCl}_3$ )  $\delta$  (ppm): -69.4; ESI-HRMS:  $[\text{M}+\text{H}]^+$  calcd. for  $\text{C}_{16}\text{H}_{15}^{79}\text{BrF}_3\text{O}_3$  391.0151, found 391.0154; calcd. for  $\text{C}_{16}\text{H}_{15}^{81}\text{BrF}_3\text{O}_3$  393.0131, found 313.0135; 96% ee was determined by HPLC on OD-H column, hexane/*i*-propanol (80/20), 1.0 mL/min, UV 210 nm,  $t_{\text{major}} = 7.737$  min,  $t_{\text{minor}} = 10.890$  min;  $[\alpha]_{\text{D}}^{25} = 21.6^\circ$  ( $c = 0.278$ ,  $\text{CHCl}_3$ ).

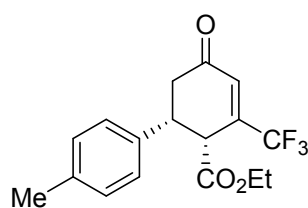

**Ethyl (1R, 2R)-4'-methyl-5-oxo-3-(trifluoromethyl)-1,2,5,6-tetrahydro-[1,1'-biphenyl]-2-carboxylate (4ah):** Colourless oil; 55% yield purified by flash column chromatography (EtOAc/petroleum ether);  $^1\text{H NMR}$  (400 MHz,  $\text{CDCl}_3$ )  $\delta$  (ppm): 7.17 (d,  $J = 8.0$  Hz,



2H), 7.10 (d,  $J = 8.0$  Hz, 2H), 6.60 (s, 1H), 3.99-3.91 (m, 1H), 3.89-3.81 (m, 1H), 3.70-3.65 (m, 2H), 3.50-3.41 (m, 1H), 2.67-2.62 (m, 1H), 2.35 (s, 3H), 0.92 (t,  $J = 7.2$  Hz, 3H);  $^{13}\text{C}$  NMR (100 MHz,  $\text{CDCl}_3$ )  $\delta$  (ppm): 197.4, 168.2, 143.0 (q,  $^2J_{\text{C-F}} = 31.8$  Hz), 137.7, 135.3, 130.3 (q,  $^3J_{\text{C-F}} = 4.8$  Hz), 129.4, 126.9, 122.4 (q,  $^1J_{\text{C-F}} = 272.9$  Hz), 61.6, 46.2, 42.1, 37.5, 21.0, 13.5;  $^{19}\text{F}$  NMR (376 MHz,  $\text{CDCl}_3$ )  $\delta$  (ppm): -69.5; ESI-HRMS:  $[\text{M}+\text{H}]^+$  calcd. for  $\text{C}_{17}\text{H}_{18}\text{F}_3\text{O}_3$  327.1203, found 327.1203; 92% ee was determined by HPLC on OD-H column, hexane/*i*-propanol (90/10), 1.0 mL/min, UV 210 nm,  $t_{\text{major}} = 8.197$  min,  $t_{\text{minor}} = 11.483$  min;  $[\alpha]_{\text{D}}^{25} = -29.7^\circ$  ( $c = 0.232$ ,  $\text{CHCl}_3$ ).

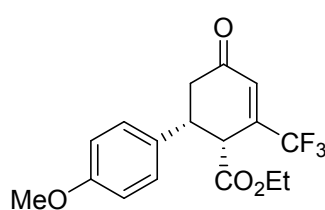

**Ethyl (1*R*, 2*R*)-4'-methoxy-5-oxo-3-(trifluoromethyl)-1,2,5,6-tetrahydro-[1,1'-biphenyl]-2-carboxylate (4ai):** Colourless oil; 69% yield purified by flash column chromatography (EtOAc/petroleum ether);  $^1\text{H}$  NMR (400 MHz,  $\text{CDCl}_3$ )  $\delta$  (ppm):

7.13 (d,  $J = 8.8$  Hz, 2H), 6.89 (d,  $J = 8.8$  Hz, 2H), 6.59 (s, 1H), 4.01-3.93 (m, 1H), 3.90-3.82 (m, 1H), 3.81 (s, 3H), 3.69-3.62 (m, 2H), 3.47-3.39 (m, 1H), 2.66-2.61 (m, 1H), 0.95 (t,  $J = 7.2$  Hz, 3H);  $^{13}\text{C}$  NMR (100 MHz,  $\text{CDCl}_3$ )  $\delta$  (ppm): 197.4, 168.3, 159.2, 143.0 (q,  $^2J_{\text{C-F}} = 31.8$  Hz), 130.4, 130.3 (q,  $^3J_{\text{C-F}} = 4.7$  Hz), 128.2, 122.5 (q,  $^1J_{\text{C-F}} = 272.8$  Hz), 114.1, 61.6, 55.3, 46.4, 41.8, 37.8, 13.7;  $^{19}\text{F}$  NMR (376 MHz,  $\text{CDCl}_3$ )  $\delta$  (ppm): -69.4; ESI-HRMS:  $[\text{M}+\text{H}]^+$  calcd. for  $\text{C}_{17}\text{H}_{18}\text{F}_3\text{O}_4$  343.1152, found 343.1152; 91% ee was determined by HPLC on OD-H column, hexane/*i*-propanol (80/20), 1.0 mL/min, UV 210 nm,  $t_{\text{minor}} = 8.010$  min,  $t_{\text{major}} = 9.170$  min;  $[\alpha]_{\text{D}}^{25} = -29.7^\circ$  ( $c = 0.564$ ,  $\text{CHCl}_3$ ).

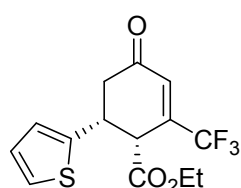

**Ethyl (1*R*, 6*R*)-4-oxo-6-(thiophen-2-yl)-2-(trifluoromethyl)cyclohex-2-ene-1-carboxylate (4al):** Colourless oil; 49% yield purified by flash column chromatography (EtOAc/petroleum ether);  $^1\text{H}$  NMR (400 MHz,  $\text{CDCl}_3$ )  $\delta$  (ppm): 7.28 (dd,  $J = 5.2, 1.2$  Hz, 1H), 7.00 (dd,  $J = 5.2, 3.6$  Hz,

1H), 6.93 (d,  $J = 3.2$  Hz, 1H), 6.60 (s, 1H), 4.05-3.91 (m, 3H), 3.80 (d,  $J = 5.2$  Hz, 1H), 3.42 (dd,  $J = 17.2, 14.4$  Hz, 1H), 2.81 (dd,  $J = 17.2, 4.0$  Hz, 1H), 1.01 (t,  $J = 7.2$  Hz, 3H);  $^{13}\text{C}$  NMR (100 MHz,  $\text{CDCl}_3$ )  $\delta$  (ppm): 196.2, 167.9, 142.6 (q,  $^2J_{\text{C-F}} = 32.1$  Hz), 141.7, 130.3 (q,  $^3J_{\text{C-F}} = 4.8$  Hz), 126.9, 124.88, 124.85, 122.3 (q,  $^1J_{\text{C-F}} = 272.9$  Hz), 61.9, 46.6, 38.9, 38.1, 13.6;  $^{19}\text{F}$  NMR (376 MHz,  $\text{CDCl}_3$ )  $\delta$  (ppm): -69.4; ESI-HRMS:  $[\text{M}+\text{H}]^+$  calcd. for  $\text{C}_{14}\text{H}_{14}\text{F}_3\text{O}_3\text{S}$  319.0610, found 319.0611; 84% ee was determined by HPLC on OD-H column, hexane/*i*-propanol (90/10), 1.0

mL/min, UV 210 nm,  $t_{\text{minor}} = 7.697$  min,  $t_{\text{major}} = 8.257$  min;  $[\alpha]_{\text{D}}^{25} = -20.0^\circ$  ( $c = 0.170$ ,  $\text{CHCl}_3$ ).

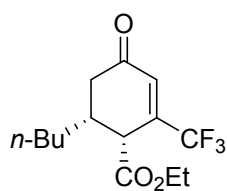

**Ethyl (1R,6R)-6-butyl-4-oxo-2-(trifluoromethyl)cyclohex-2-ene-1-carboxylate (4an):** Colourless oil; 45% yield purified by flash column chromatography (EtOAc/petroleum ether);  $^1\text{H}$  NMR (400 MHz,  $\text{CDCl}_3$ )  $\delta$  (ppm): 6.49 (s, 1H), 4.22 (q,  $J = 7.2$  Hz, 2H), 3.52 (d,  $J = 2.0$  Hz, 1H), 2.63

(t,  $J = 16.0$  Hz, 1H), 2.46 (d,  $J = 17.6$  Hz, 1H), 2.36-2.33 (m, 1H), 1.48-1.33 (m, 6H), 1.27 (t,  $J = 7.2$  Hz, 3H), 0.91 (t,  $J = 6.0$  Hz, 3H);  $^{13}\text{C}$  NMR (100 MHz,  $\text{CDCl}_3$ )  $\delta$  (ppm): 197.7, 168.5, 143.6 (q,  $^2J_{\text{C-F}} = 31.6$  Hz), 130.2 (q,  $^3J_{\text{C-F}} = 5.2$  Hz), 122.5 (d,  $^1J = 272.8$  Hz), 61.8, 43.2, 39.4, 37.7, 32.9, 28.5, 22.5, 14.1, 13.9;  $^{19}\text{F}$  NMR (376 MHz,  $\text{CDCl}_3$ )  $\delta$  (ppm): -69.8; ESI-HRMS:  $[\text{M}+\text{H}]^+$  calcd. for  $\text{C}_{14}\text{H}_{20}\text{F}_3\text{O}_3$  293.1359, found 293.1354; 90% ee was determined by HPLC on IC-H column, hexane/*i*-propanol (95/5), 1.0 mL/min, UV 210 nm,  $t_{\text{minor}} = 5.760$  min,  $t_{\text{major}} = 7.067$  min;  $[\alpha]_{\text{D}}^{25} = 21.8^\circ$  ( $c = 0.752$ ,  $\text{CHCl}_3$ ).

#### 4. General procedure for the syntheses of 5 and 5'

*m*-CPBA (20.4 mg, 0.8 mmol) was added to a solvent of **3ab** (66.1 mg, 0.2 mmol) in DCE (2 mL). The mixture was stirred at 60 °C for 120 h and then cooled to room temperature. The residue was purified by flash chromatography on silica gel (EtOAc/petroleum ether) to afford the desired lactone **5**.

**Ethyl (3R, 4R, 5R)-5-hydroxy-7-oxo-3-phenyl-5-(trifluoromethyl)oxepane-4-carboxylate (5) :**

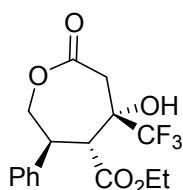

White solid; 50% yield purified by flash column chromatography (EtOAc/petroleum ether);  $^1\text{H}$  NMR (400 MHz,  $\text{CDCl}_3$ )  $\delta$  (ppm): 7.36-7.31 (m, 3H), 7.16 (d,  $J = 8.0$  Hz, 2H), 5.18 (s, 1H), 4.57 (dd,  $J = 13.2, 9.6$  Hz, 1H), 4.28 (dd,  $J = 13.6, 1.2$  Hz, 1H), 3.80-3.72 (m, 2H), 3.54 (t,  $J = 10.6$  Hz, 1H), 3.28 (d,  $J =$

14.0 Hz, 1H), 3.19 (d,  $J = 12.4$  Hz, 2H), 0.74 (t,  $J = 7.2$  Hz, 3H);  $^{13}\text{C}$  NMR (100 MHz,  $\text{CDCl}_3$ )  $\delta$  (ppm): 173.2, 167.9, 137.1, 129.1, 128.4, 127.7, 124.8 (q,  $^1J_{\text{C-F}} = 286.6$  Hz), 73.1 (q,  $^2J_{\text{C-F}} = 28.2$  Hz), 70.5, 61.8, 52.6, 45.4, 38.0, 13.1;  $^{19}\text{F}$  NMR (376 MHz,  $\text{CDCl}_3$ )  $\delta$  (ppm): -80.7; ESI-HRMS:  $[\text{M}+\text{H}]^+$  calcd. for  $\text{C}_{16}\text{H}_{18}\text{F}_3\text{O}_5$  347.1101, found 347.1107; 97% ee was determined by HPLC on OD-H column, hexane/*i*-propanol (80/20), 1.0 mL/min, UV 210 nm,  $t_{\text{major}} = 7.843$  min,  $t_{\text{minor}} = 9.650$  min;  $[\alpha]_{\text{D}}^{25} = -45.4^\circ$  ( $c = 0.438$ ,  $\text{CHCl}_3$ ).

**Ethyl (3R, 4S, 5R)-5-hydroxy-7-oxo-3-phenyl-5-(trifluoromethyl)oxepane-4-carboxylate (5') :**

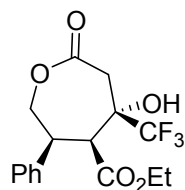

White solid; 45% yield purified by flash column chromatography

(EtOAc/petroleum ether);  $^1\text{H}$  NMR (400 MHz,  $\text{CDCl}_3$ )  $\delta$  (ppm): 7.32-7.26 (m,

3H), 7.06 (d,  $J = 6.8$  Hz, 2H), 5.68 (dd,  $J = 12.8, 10.0$  Hz, 1H), 4.69 (br s, 1H), 4.38

(d,  $J = 12.8$  Hz, 1H), 4.27 (d,  $J = 14.4$  Hz, 1H), 3.95-3.77 (m, 3H), 3.28 (d,  $J = 4.0$

Hz, 1H), 3.03 (dd,  $J = 14.4, 1.2$  Hz, 1H), 0.90 (t,  $J = 7.2$  Hz, 3H);  $^{13}\text{C}$  NMR (100 MHz,  $\text{CDCl}_3$ )  $\delta$

(ppm): 170.8, 170.3, 138.5, 128.8, 127.6, 127.4, 124.5 (q,  $^1J_{\text{C-F}} = 285.4$  Hz), 72.2 (q,  $^2J_{\text{C-F}} = 29.2$

Hz), 67.2, 61.0, 51.7, 41.7, 36.8, 13.4;  $^{19}\text{F}$  NMR (376 MHz,  $\text{CDCl}_3$ )  $\delta$  (ppm): -81.4; ESI-HRMS:

$[\text{M}+\text{H}]^+$  calcd. for  $\text{C}_{16}\text{H}_{18}\text{F}_3\text{O}_5$  347.1101, found 347.1109; 99% ee was determined by HPLC on

OD-H column, hexane/*i*-propanol (80/20), 1.0 mL/min, UV 210 nm,  $t_{\text{minor}} = 4.883$  min,  $t_{\text{major}} =$

5.740 min;  $[\alpha]_{\text{D}}^{25} = -99.7^\circ$  ( $c = 0.302$ ,  $\text{CHCl}_3$ ).

**5. General procedure for the syntheses of 6 and 6'**

After **3am** (53.6 mg, 0.2 mmol) and malononitrile (16.5 mg, 0.25 mmol) were dissolved in

MeOH (1 mL), DABCO (4.5 mg, 0.04 mmol) was added in one portion at room temperature.

Once **3am** was completely consumed as detected by TLC after 20 h, the reaction mixture was

concentrated *in vacuo*. The residue was purified by flash chromatography on silica gel

(EtOAc/petroleum ether) to afford the desired adduct.

**Ethyl (1R, 2R, 6R)-4-(dicyanomethylene)-2-hydroxy-6-methyl-2-(trifluoromethyl) cyclo-**

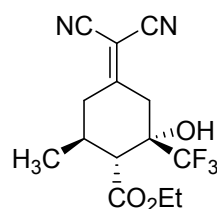

**hexane-1-carboxylate (6m):** White solid; 53% yield purified by flash

column chromatography (EtOAc/petroleum ether);  $^1\text{H}$  NMR (400 MHz,

$\text{CDCl}_3$ )  $\delta$  (ppm): 4.75 (s, 1H), 4.31-4.23 (m, 2H), 3.31 (dd,  $J = 14.4, 1.6$  Hz,

1H), 3.13-3.08 (m, 1H), 2.60 (d,  $J = 11.6$  Hz, 1H), 2.43 (d,  $J = 14.4$  Hz, 1H),

2.34-2.23 (m, 1H), 2.11 (t,  $J = 13.4$  Hz, 1H), 1.31 (t,  $J = 7.2$  Hz, 3H), 1.12 (d,  $J = 6.4$  Hz, 3H);  $^{13}\text{C}$

NMR (100 MHz,  $\text{CDCl}_3$ )  $\delta$  (ppm): 174.0, 173.6, 124.4 (q,  $^1J_{\text{C-F}} = 285.6$  Hz), 110.9, 110.7, 87.5,

75.9 (q,  $^2J_{\text{C-F}} = 28.6$  Hz), 62.4, 49.8, 40.2, 37.6, 33.1, 19.3, 13.9;  $^{19}\text{F}$  NMR (376 MHz,  $\text{CDCl}_3$ )  $\delta$

(ppm): -81.3; ESI-HRMS:  $[\text{M}+\text{H}]^+$  calcd. for  $\text{C}_{14}\text{H}_{16}\text{F}_3\text{N}_2\text{O}_3$  317.1108, found 317.1109; 99% ee

was determined by HPLC on IC-H column, hexane/*i*-propanol (90/10), 1.0 mL/min, UV 210 nm,

$t_{\text{major}} = 7.023$  min,  $t_{\text{minor}} = 11.190$  min;  $[\alpha]_{\text{D}}^{25} = -43.6^\circ$  ( $c = 0.762$ ,  $\text{CHCl}_3$ ).

**Ethyl (1S, 2R, 6R)-4-(dicyanomethylene)-2-hydroxy-6-methyl-2-(trifluoromethyl)cyclohexane-1-carboxylate (6m')**: White solid; 60% yield purified by flash column chromatography (EtOAc/petroleum ether); <sup>1</sup>H NMR (400 MHz, CDCl<sub>3</sub>) δ (ppm): 4.23-4.16 (q, *J* = 8.2 Hz, 2H), 3.44 (br, 1H), 3.32 (d, *J* = 14.4 Hz, 1H), 3.10 (d, *J* = 14.8 Hz, 1H), 2.92-2.80 (m, 3H), 2.55-2.44 (m, 1H), 1.29

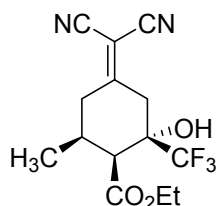

(t, *J* = 7.2 Hz, 3H), 1.08 (d, *J* = 6.8 Hz, 3H); <sup>13</sup>C NMR (100 MHz, CDCl<sub>3</sub>) δ (ppm): 178.7, 170.0, 124.3 (q, <sup>1</sup>*J*<sub>C-F</sub> = 284.2 Hz), 111.2, 111.0, 86.2, 75.7 (q, <sup>2</sup>*J*<sub>C-F</sub> = 29.6 Hz), 61.5, 48.6, 36.5, 35.4, 30.4, 18.1, 14.0; <sup>19</sup>F NMR (376 MHz, CDCl<sub>3</sub>) δ (ppm): -81.3; ESI-HRMS: [M+H]<sup>+</sup> calcd. for C<sub>14</sub>H<sub>16</sub>F<sub>3</sub>N<sub>2</sub>O<sub>3</sub> 317.1108, found 317.1106; 99% ee was determined by HPLC on OD-H column, hexane/*i*-propanol (95/5), 1.0 mL/min, UV 210 nm, *t*<sub>minor</sub> = 6.243 min, *t*<sub>major</sub> = 12.167 min; [α]<sub>D</sub><sup>25</sup> = -1.5° (*c* = 0.522, CHCl<sub>3</sub>).

**Ethyl (1R, 2R, 6R)-6-butyl-4-(dicyanomethylene)-2-hydroxy-2-(trifluoromethyl)cyclohexane-1-carboxylate (6n)**: White solid; 55% yield purified by flash column chromatography (EtOAc/petroleum ether); <sup>1</sup>H NMR (400 MHz, CDCl<sub>3</sub>) δ (ppm): 4.73 (d, *J* = 2.0 Hz, 1H), 4.26 (q, *J* = 7.2 Hz, 2H), 3.30 (d, *J* = 14.4 Hz, 1H), 3.19-3.15 (m, 1H), 2.71 (d, *J* = 11.6 Hz, 1H), 2.43 (dd, *J* = 14.4,

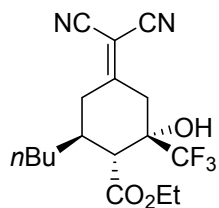

0.8 Hz, 1H), 2.25-2.17 (m, 1H), 2.07 (t, *J* = 13.4 Hz, 1H), 1.47-1.23 (m, 9H), 0.90 (t, *J* = 7.0 Hz, 3H); <sup>13</sup>C NMR (100 MHz, CDCl<sub>3</sub>) δ (ppm): 174.5, 173.7, 124.4 (q, <sup>1</sup>*J*<sub>C-F</sub> = 285.6 Hz), 110.9, 110.8, 87.5, 76.0 (q, <sup>2</sup>*J*<sub>C-F</sub> = 28.6 Hz), 62.4, 48.3, 37.8, 37.6, 37.4, 32.7, 27.3, 22.5, 13.8, 13.7; <sup>19</sup>F NMR (376 MHz, CDCl<sub>3</sub>) δ (ppm): -81.3; ESI-HRMS: [M+H]<sup>+</sup> calcd. for C<sub>17</sub>H<sub>22</sub>F<sub>3</sub>N<sub>2</sub>O<sub>3</sub> 359.1577, found 359.1583; 95% ee was determined by HPLC on IC-H column, hexane/*i*-propanol (90/10), 1.0 mL/min, UV 210 nm, *t*<sub>major</sub> = 5.743 min, *t*<sub>minor</sub> = 9.017 min; [α]<sub>D</sub><sup>25</sup> = -30.6° (*c* = 1.104, CHCl<sub>3</sub>).

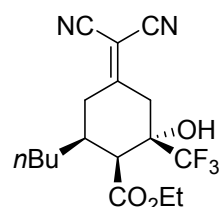

**Ethyl (1S, 2R, 6R)-6-butyl-4-(dicyanomethylene)-2-hydroxy-2-(trifluoromethyl)cyclohexane-1-carboxylate (6n')**: White solid; 66% yield purified by flash column chromatography (EtOAc/petroleum ether); <sup>1</sup>H

NMR (400 MHz, CDCl<sub>3</sub>) δ (ppm): 4.19 (q, *J* = 7.2 Hz, 2H), 3.63-3.56 (m, 1H), 3.33 (d, *J* = 14.8 Hz, 1H), 3.10 (d, *J* = 14.8 Hz, 1H), 2.98 (d, *J* = 4.0 Hz, 1H), 2.92 (dd, *J* = 15.0, 4.2 Hz, 1H), 2.82 (t, *J* = 13.6 Hz, 1H), 2.34-2.29 (m, 1H), 1.34-1.24 (m, 9H), 0.89 (t, *J* = 7.0 Hz, 3H); <sup>13</sup>C NMR (100 MHz, CDCl<sub>3</sub>) δ (ppm): 179.1, 170.1, 124.4 (q, <sup>1</sup>*J*<sub>C-F</sub> = 284.4 Hz), 111.2, 111.0,

86.1, 75.6 (q,  $^2J_{C-F} = 29.7$  Hz), 61.4, 46.8, 35.7, 35.5, 35.3, 32.6, 28.6, 22.4, 13.9, 13.8;  $^{19}\text{F}$  NMR (376 MHz,  $\text{CDCl}_3$ )  $\delta$  (ppm): -81.3; ESI-HRMS:  $[\text{M}+\text{H}]^+$  calcd. for  $\text{C}_{17}\text{H}_{22}\text{F}_3\text{N}_2\text{O}_3$  359.1577, found 359.1570; 99% ee was determined by HPLC on OD-H column, hexane/*i*-propanol (95/5), 1.0 mL/min, UV 254 nm,  $t_{\text{minor}} = 5.090$  min,  $t_{\text{major}} = 10.680$  min;  $[\alpha]_{\text{D}}^{25} = -11.4^\circ$  ( $c = 0.140$ ,  $\text{CHCl}_3$ ).

## 6. X-ray crystallographic analysis of 3ac (CCDC 1973697)

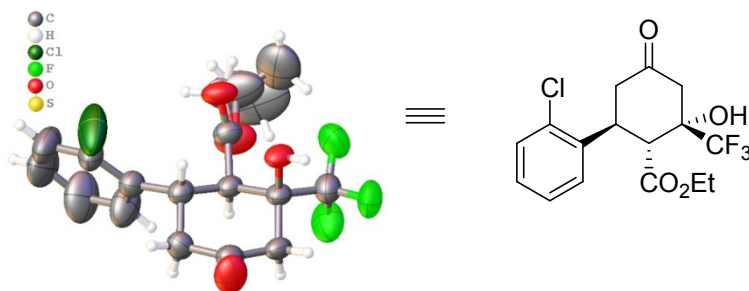

|                                    |                                                    |
|------------------------------------|----------------------------------------------------|
| Identification code                | lq-0903-2                                          |
| Empirical formula                  | $\text{C}_{16}\text{H}_{16}\text{ClF}_3\text{O}_4$ |
| Formula weight                     | 364.74                                             |
| Temperature/K                      | 297.60(10)                                         |
| Crystal system                     | orthorhombic                                       |
| Space group                        | $P2_12_12_1$                                       |
| $a/\text{\AA}$                     | 5.6493(2)                                          |
| $b/\text{\AA}$                     | 14.4444(7)                                         |
| $c/\text{\AA}$                     | 21.6781(9)                                         |
| $\alpha/^\circ$                    | 90                                                 |
| $\beta/^\circ$                     | 90                                                 |
| $\gamma/^\circ$                    | 90                                                 |
| Volume/ $\text{\AA}^3$             | 1768.95(14)                                        |
| $Z$                                | 4                                                  |
| $\rho_{\text{calc}}/\text{g/cm}^3$ | 1.370                                              |
| $\mu/\text{mm}^{-1}$               | 2.351                                              |
| $F(000)$                           | 752.0                                              |
| Crystal size/ $\text{mm}^3$        | $0.7 \times 0.5 \times 0.4$                        |

|                                                  |                                                                  |
|--------------------------------------------------|------------------------------------------------------------------|
| Radiation                                        | CuK $\alpha$ ( $\lambda = 1.54184$ )                             |
| 2 $\Theta$ range for data collection/ $^{\circ}$ | 10.204 to 144.884                                                |
| Index ranges                                     | $-4 \leq h \leq 6$ , $-16 \leq k \leq 17$ , $-25 \leq l \leq 26$ |
| Reflections collected                            | 9792                                                             |
| Independent reflections                          | 3423 [ $R_{\text{int}} = 0.0337$ , $R_{\text{sigma}} = 0.0281$ ] |
| Data/restraints/parameters                       | 3423/0/240                                                       |
| Goodness-of-fit on $F^2$                         | 1.034                                                            |
| Final R indexes [ $I \geq 2\sigma(I)$ ]          | $R_1 = 0.0765$ , $wR_2 = 0.1951$                                 |
| Final R indexes [all data]                       | $R_1 = 0.0830$ , $wR_2 = 0.2084$                                 |
| Largest diff. peak/hole / $e \text{ \AA}^{-3}$   | 0.48/-0.80                                                       |
| Flack parameter                                  | 0.012(12)                                                        |

## 7. X-ray crystallographic analysis of 3al' (CCDC 1973712)

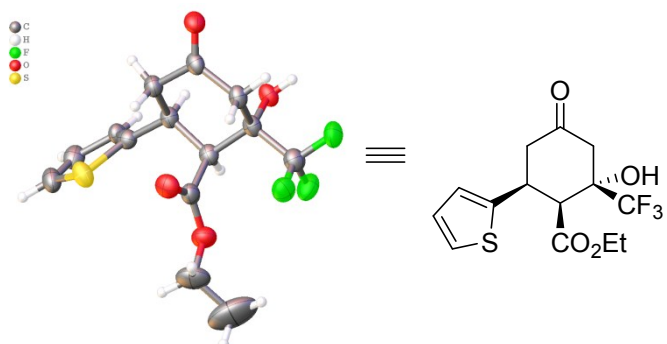

|                     |                       |
|---------------------|-----------------------|
| Identification code | lq-1d-150k            |
| Empirical formula   | $C_{14}H_{15}F_3O_4S$ |
| Formula weight      | 336.32                |
| Temperature/K       | 157(10)               |
| Crystal system      | monoclinic            |
| Space group         | I2                    |
| a/ $\text{\AA}$     | 17.4373(11)           |
| b/ $\text{\AA}$     | 5.6433(3)             |
| c/ $\text{\AA}$     | 16.0752(9)            |

|                                               |                                                               |
|-----------------------------------------------|---------------------------------------------------------------|
| $\alpha/^\circ$                               | 90                                                            |
| $\beta/^\circ$                                | 103.086(6)                                                    |
| $\gamma/^\circ$                               | 90                                                            |
| Volume/ $\text{\AA}^3$                        | 1540.78(16)                                                   |
| Z                                             | 4                                                             |
| $\rho_{\text{calc}}/\text{g}/\text{cm}^3$     | 1.450                                                         |
| $\mu/\text{mm}^{-1}$                          | 2.323                                                         |
| F(000)                                        | 696.0                                                         |
| Crystal size/ $\text{mm}^3$                   | $0.5 \times 0.4 \times 0.2$                                   |
| Radiation                                     | CuK $\alpha$ ( $\lambda = 1.54184$ )                          |
| $2\Theta$ range for data collection/ $^\circ$ | 8.504 to 146.662                                              |
| Index ranges                                  | $-21 \leq h \leq 21, -6 \leq k \leq 6, -19 \leq l \leq 19$    |
| Reflections collected                         | 8038                                                          |
| Independent reflections                       | 2763 [ $R_{\text{int}} = 0.0615, R_{\text{sigma}} = 0.0476$ ] |
| Data/restraints/parameters                    | 2763/1/201                                                    |
| Goodness-of-fit on $F^2$                      | 1.052                                                         |
| Final R indexes [ $I \geq 2\sigma(I)$ ]       | $R_1 = 0.0831, wR_2 = 0.2220$                                 |
| Final R indexes [all data]                    | $R_1 = 0.0851, wR_2 = 0.2261$                                 |
| Largest diff. peak/hole / $e \text{\AA}^{-3}$ | 0.59/-0.51                                                    |
| Flack parameter                               | 0.02(3)                                                       |

## 8. Reference

1. B. Vakulya, S. Varga, A. Csámpai and T. Soós, *Org. Lett.*, 2005, **7**, 1967.





—81.284

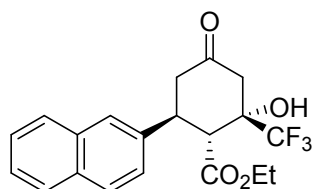

**3aa**

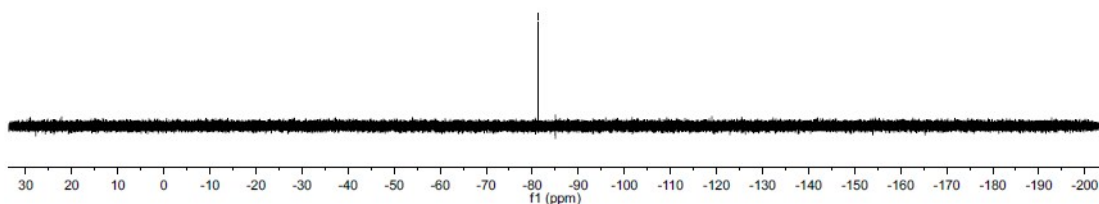

**Chromatogram**

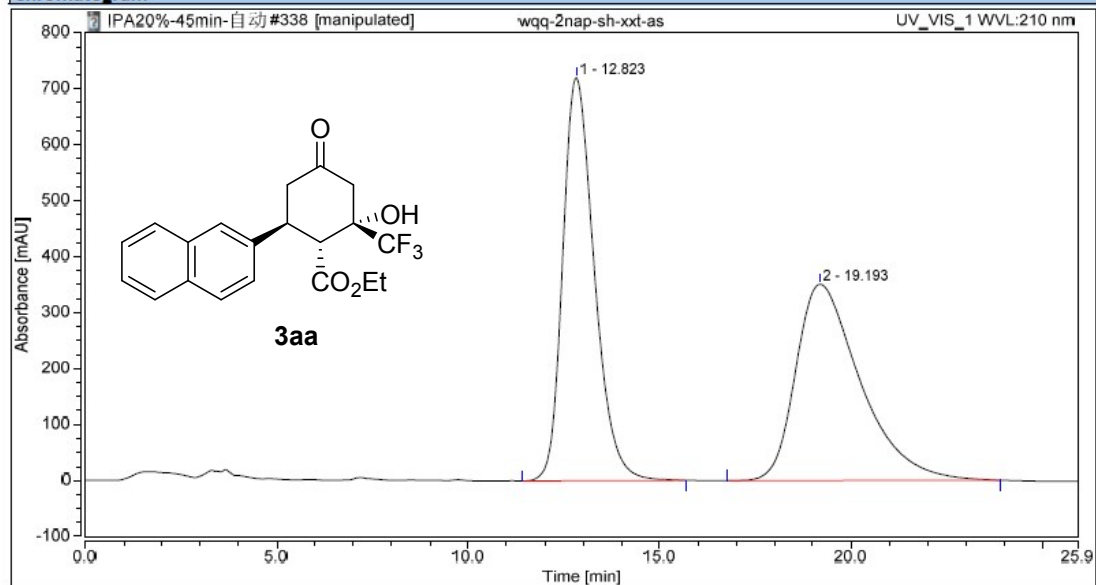

| Integration Results |           |                       |                 |               |                    |                      |                |
|---------------------|-----------|-----------------------|-----------------|---------------|--------------------|----------------------|----------------|
| No.                 | Peak Name | Retention Time<br>min | Area<br>mAU*min | Height<br>mAU | Relative Area<br>% | Relative Height<br>% | Amount<br>n.a. |
| 1                   |           | 12.823                | 688.692         | 720.386       | 50.10              | 67.26                | n.a.           |
| 2                   |           | 19.193                | 685.981         | 350.619       | 49.90              | 32.74                | n.a.           |
| Total:              |           |                       | 1374.673        | 1071.005      | 100.00             | 100.00               |                |

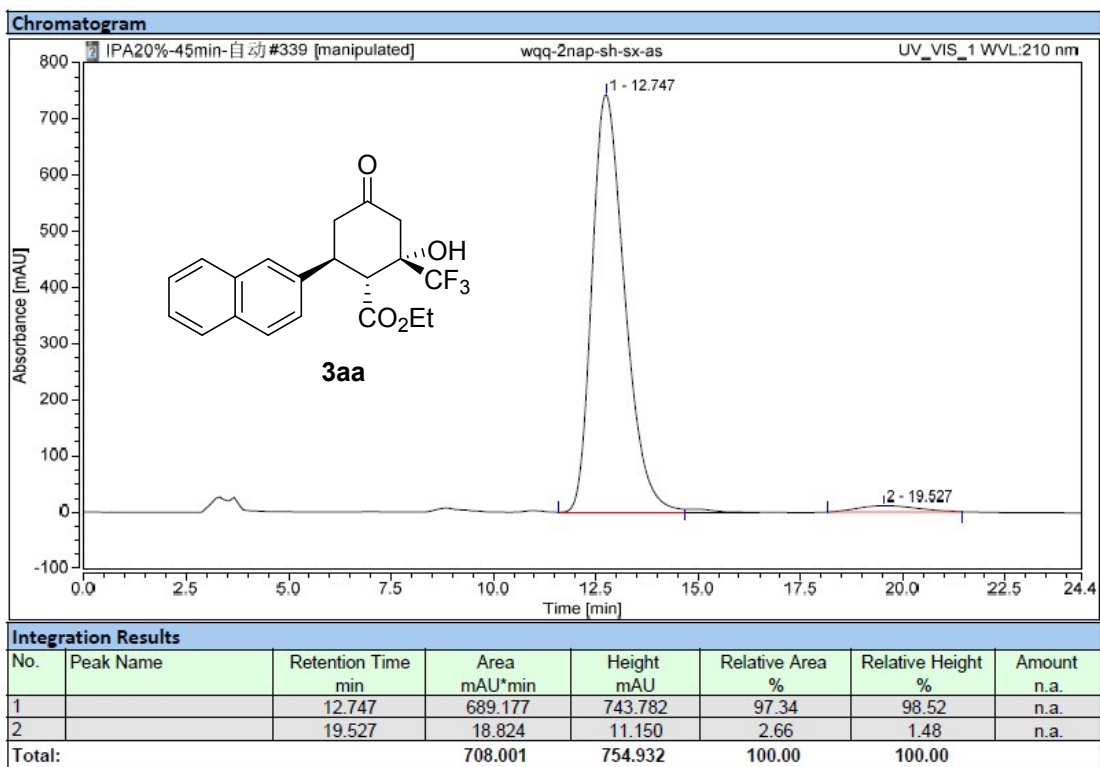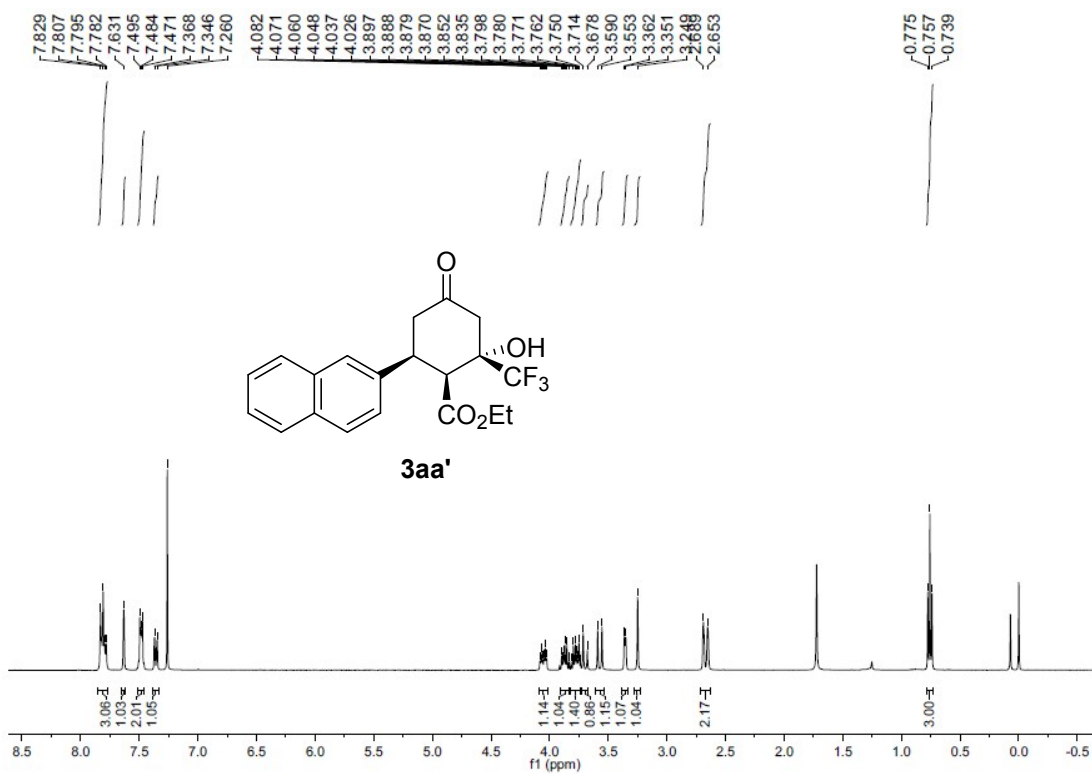

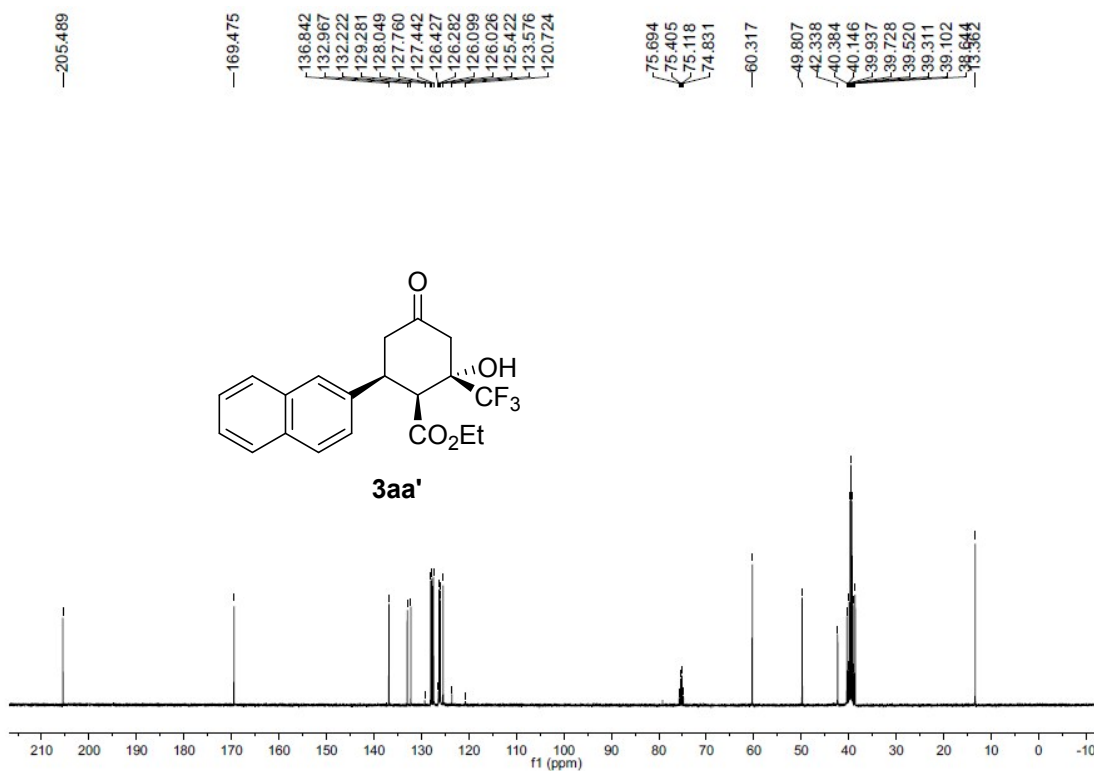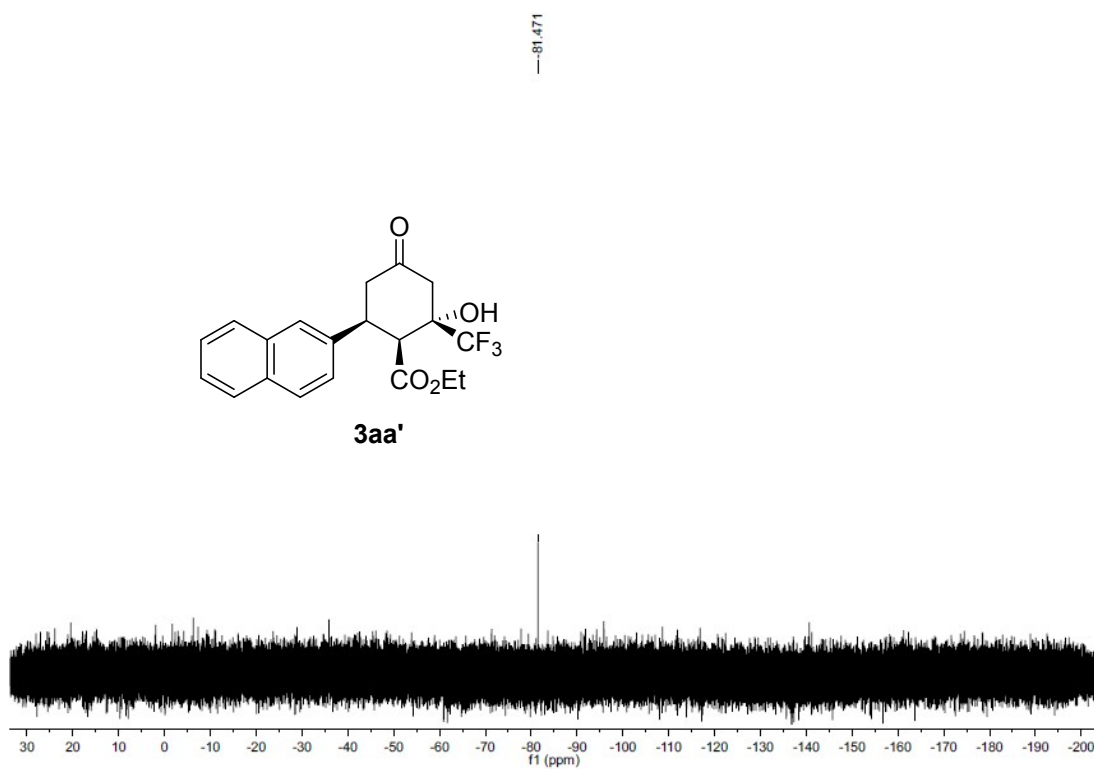

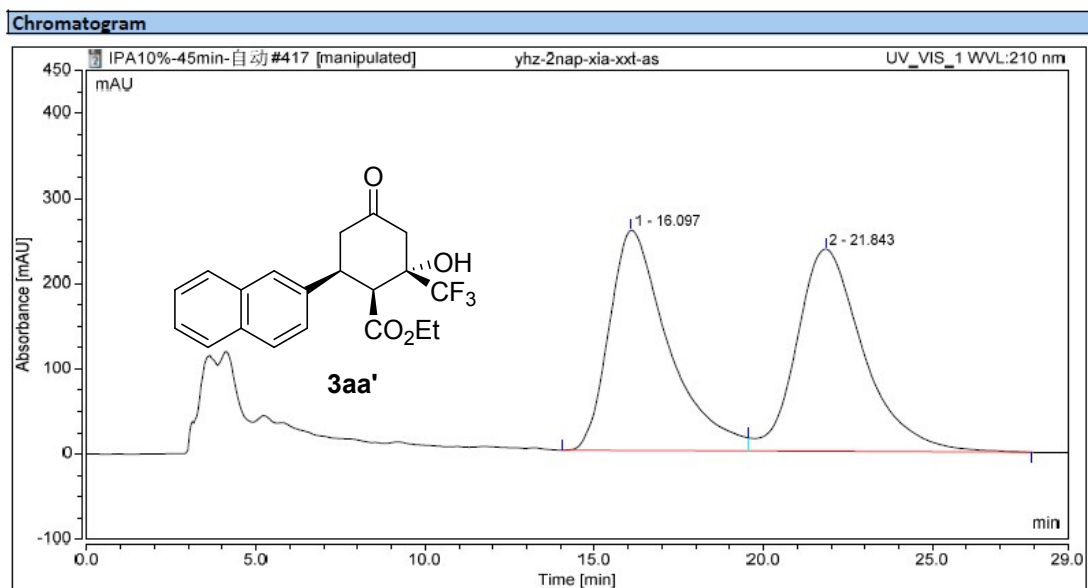

**Integration Results**

| No.           | Peak Name | Retention Time<br>min | Area<br>mAU*min | Height<br>mAU  | Relative Area<br>% | Relative Height<br>% | Amount |
|---------------|-----------|-----------------------|-----------------|----------------|--------------------|----------------------|--------|
| 1             |           | 16.097                | 525.627         | 258.600        | 49.14              | 52.14                | n.a.   |
| 2             |           | 21.843                | 543.979         | 237.400        | 50.86              | 47.86                | n.a.   |
| <b>Total:</b> |           |                       | <b>1069.606</b> | <b>496.000</b> | <b>100.00</b>      | <b>100.00</b>        |        |

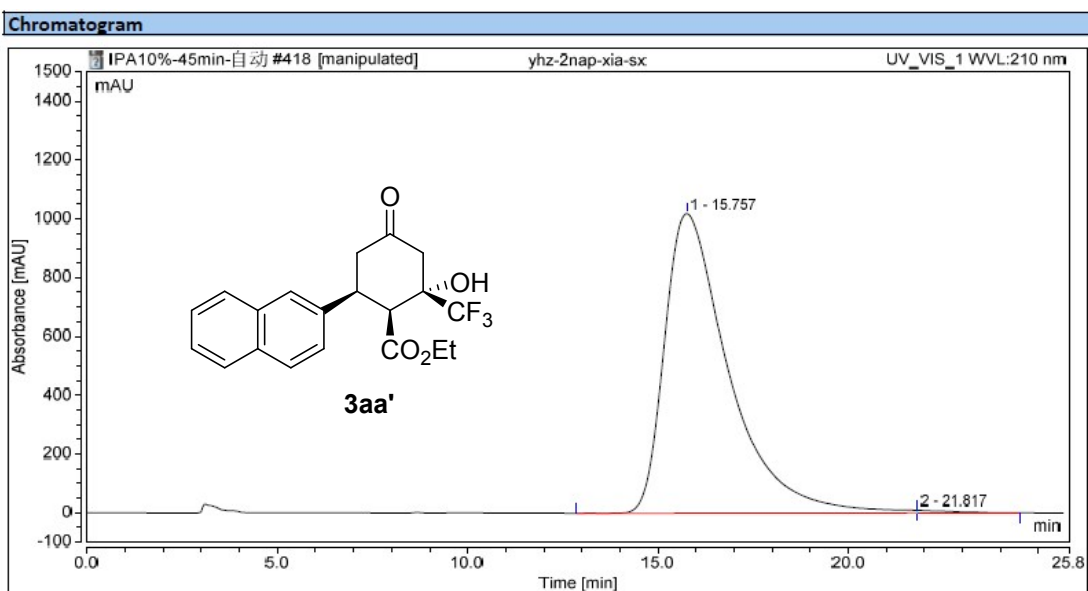

**Integration Results**

| No.           | Peak Name | Retention Time<br>min | Area<br>mAU*min | Height<br>mAU   | Relative Area<br>% | Relative Height<br>% | Amount |
|---------------|-----------|-----------------------|-----------------|-----------------|--------------------|----------------------|--------|
| 1             |           | 15.757                | 1992.206        | 1019.377        | 99.50              | 99.12                | n.a.   |
| 2             |           | 21.817                | 10.026          | 9.101           | 0.50               | 0.88                 | n.a.   |
| <b>Total:</b> |           |                       | <b>2002.232</b> | <b>1028.478</b> | <b>100.00</b>      | <b>100.00</b>        |        |

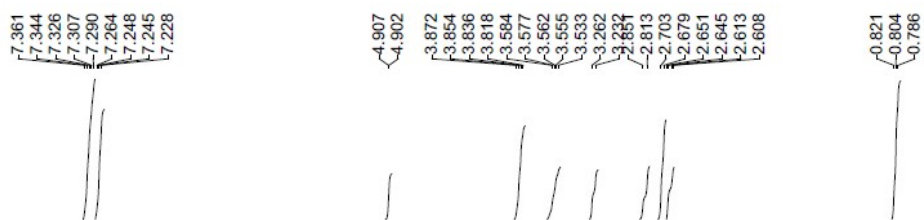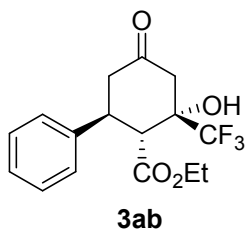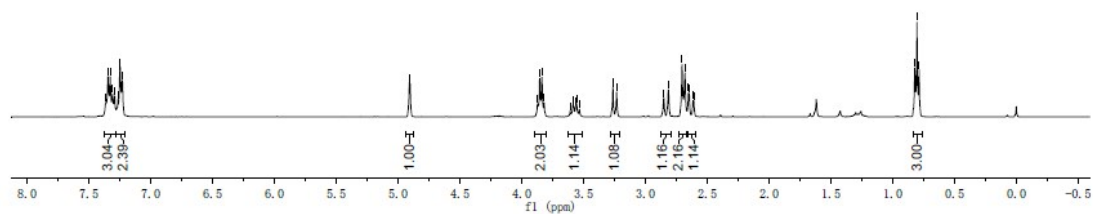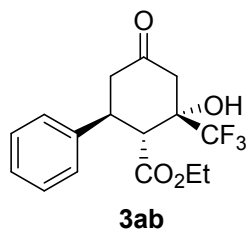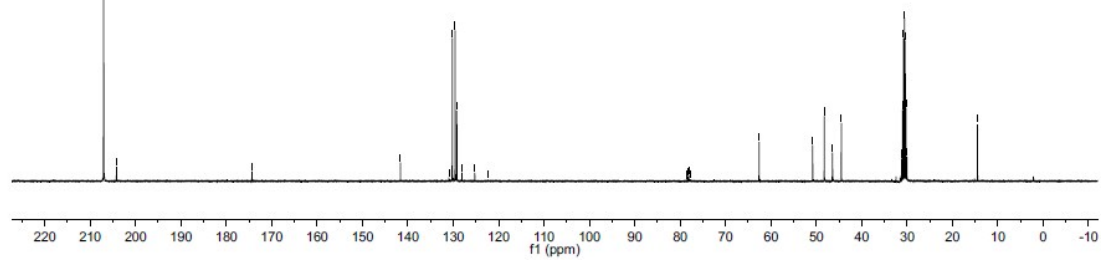

—81.364

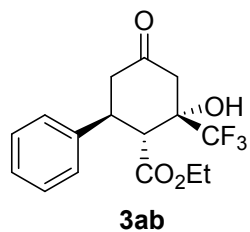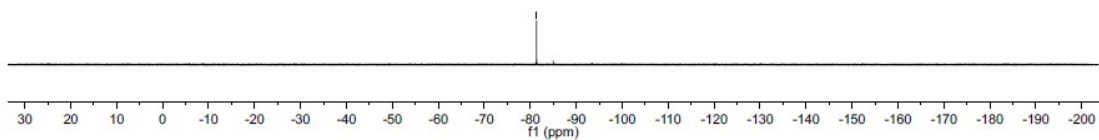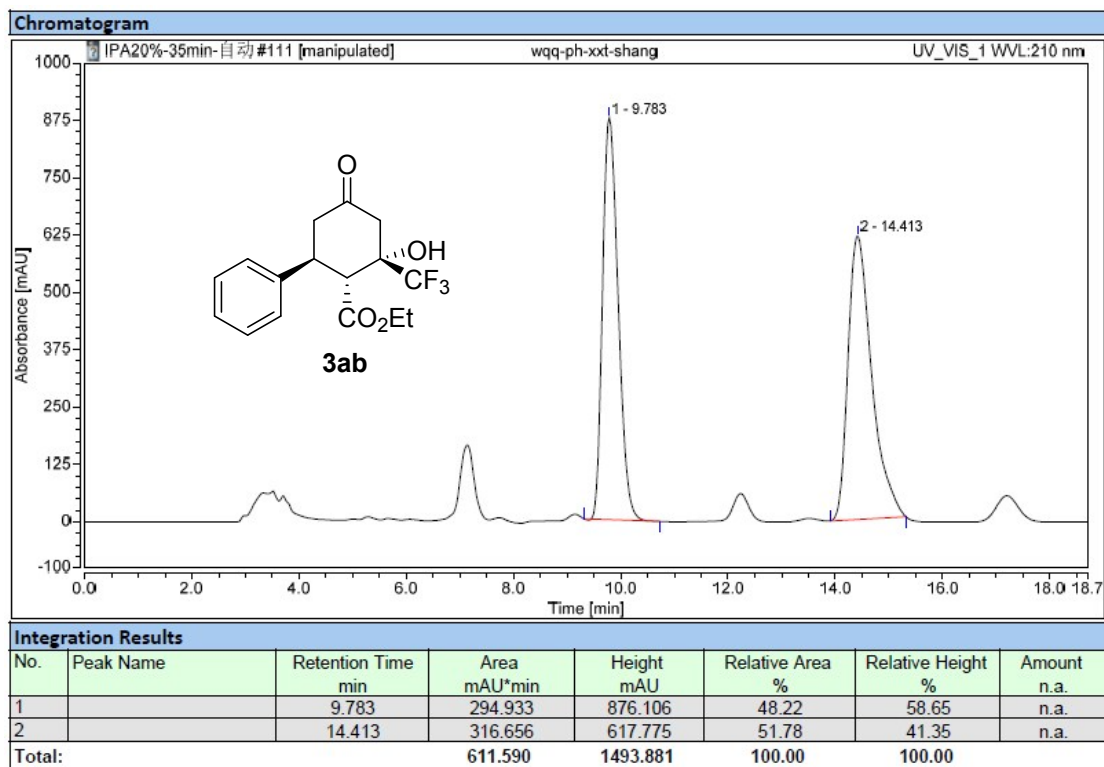

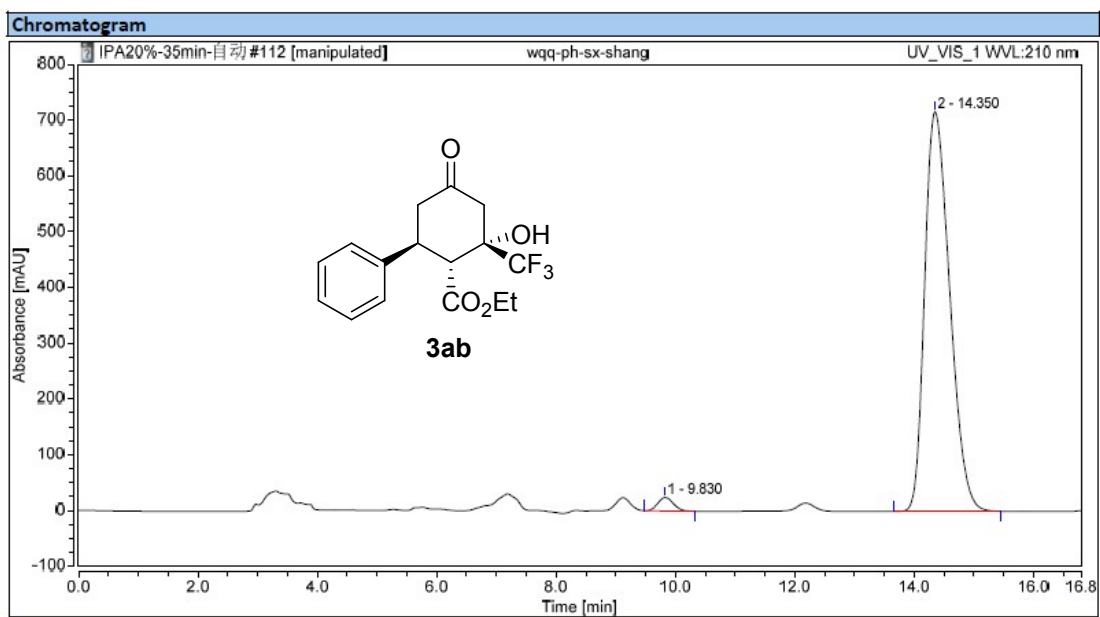

**Integration Results**

| No.           | Peak Name | Retention Time<br>min | Area<br>mAU*min | Height<br>mAU  | Relative Area<br>% | Relative Height<br>% | Amount |
|---------------|-----------|-----------------------|-----------------|----------------|--------------------|----------------------|--------|
| 1             |           | 9.830                 | 7.251           | 24.227         | 2.04               | 3.27                 | n.a.   |
| 2             |           | 14.350                | 347.341         | 716.512        | 97.96              | 96.73                | n.a.   |
| <b>Total:</b> |           |                       | <b>354.592</b>  | <b>740.739</b> | <b>100.00</b>      | <b>100.00</b>        |        |

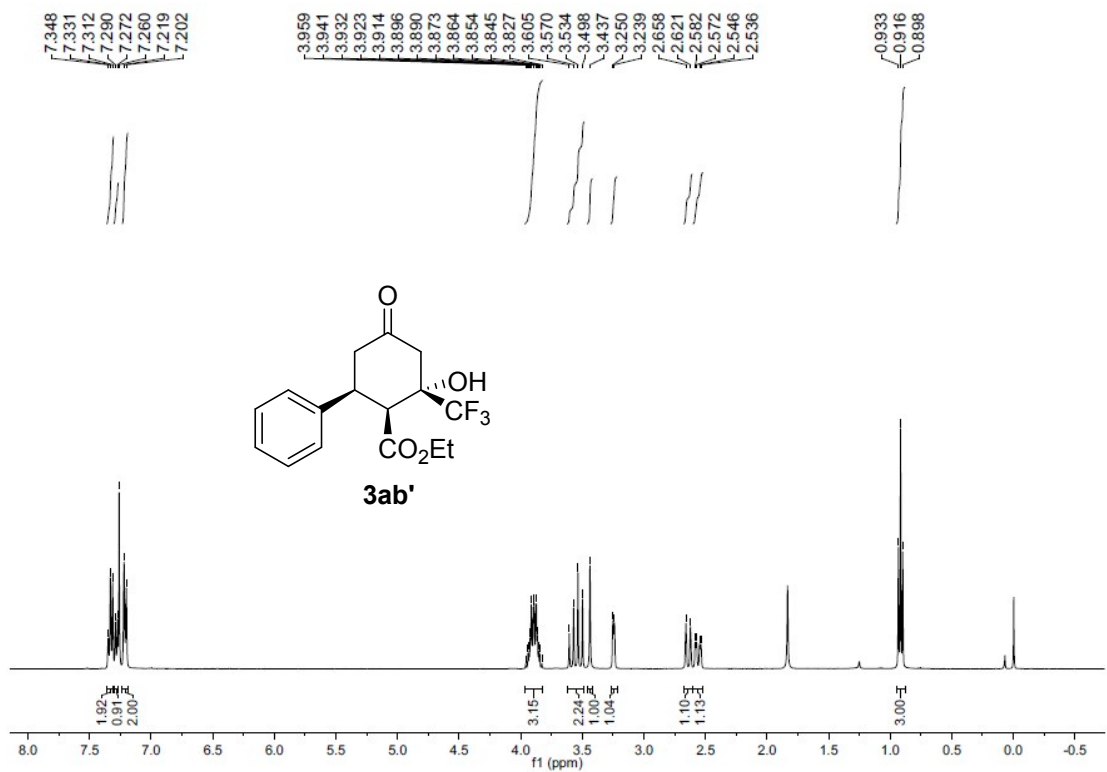

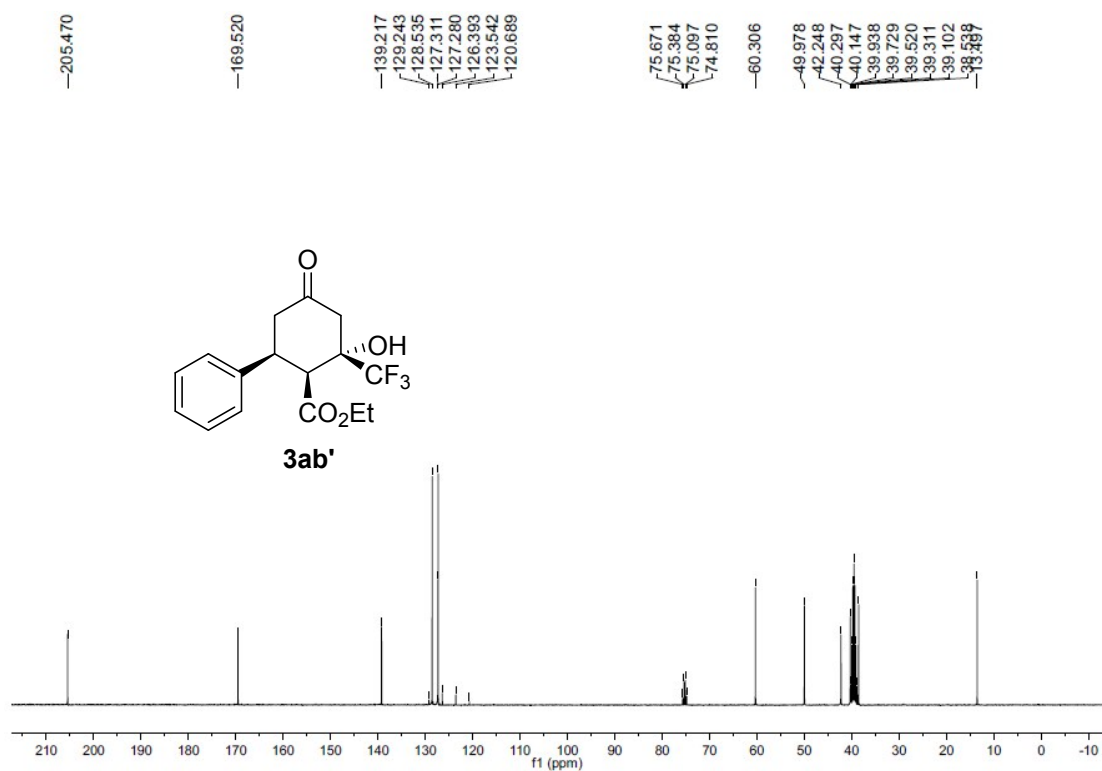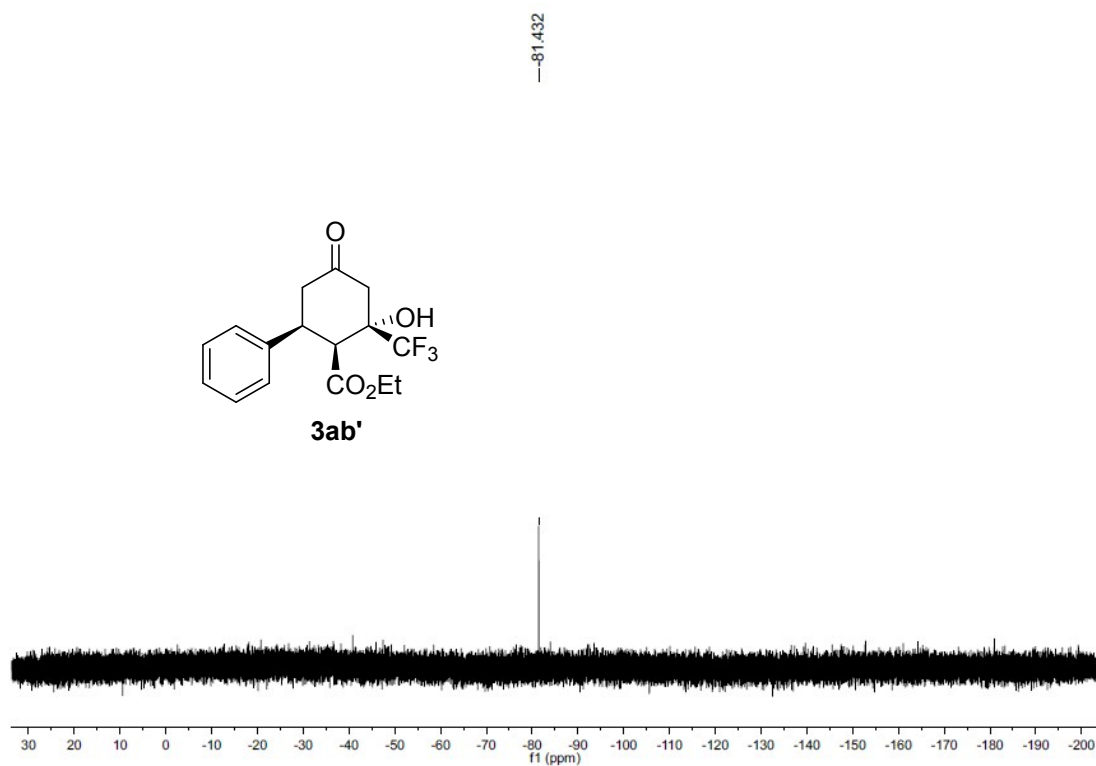



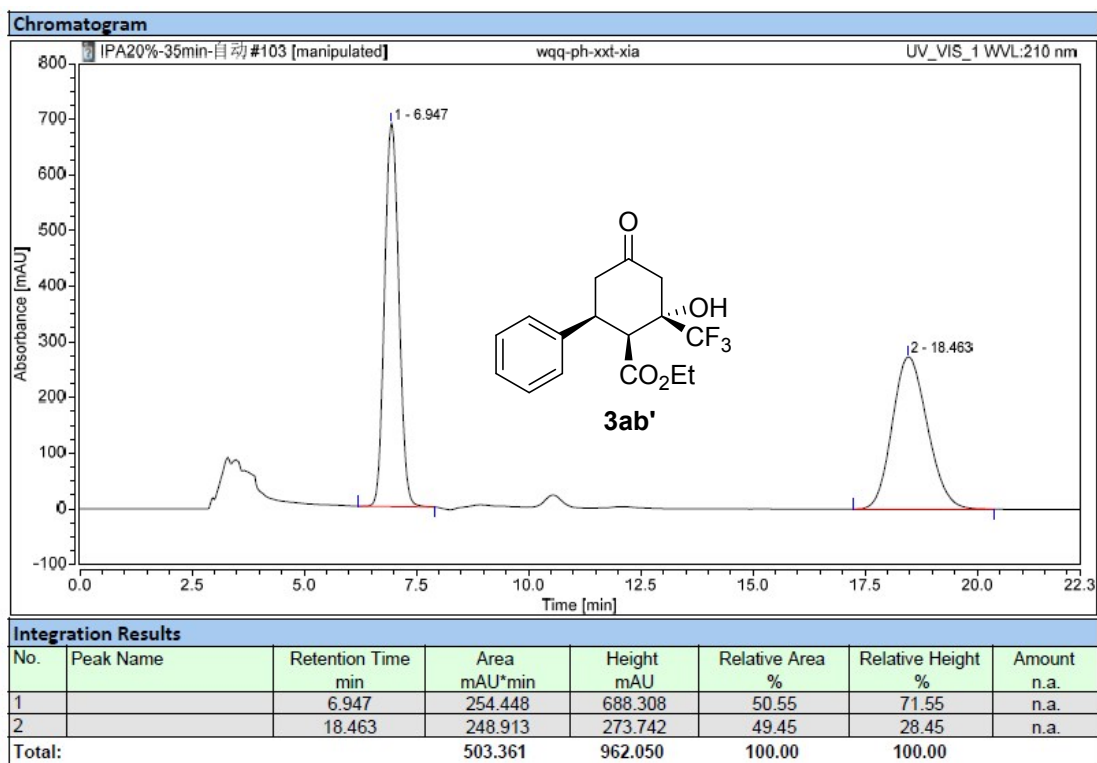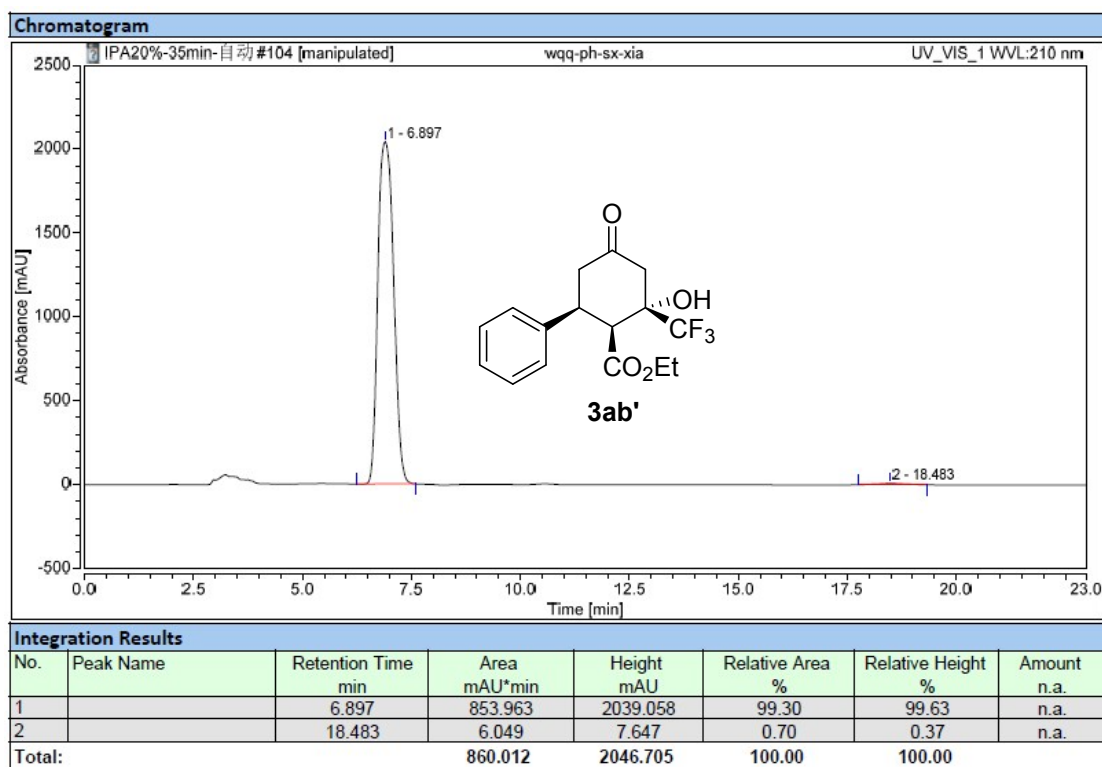

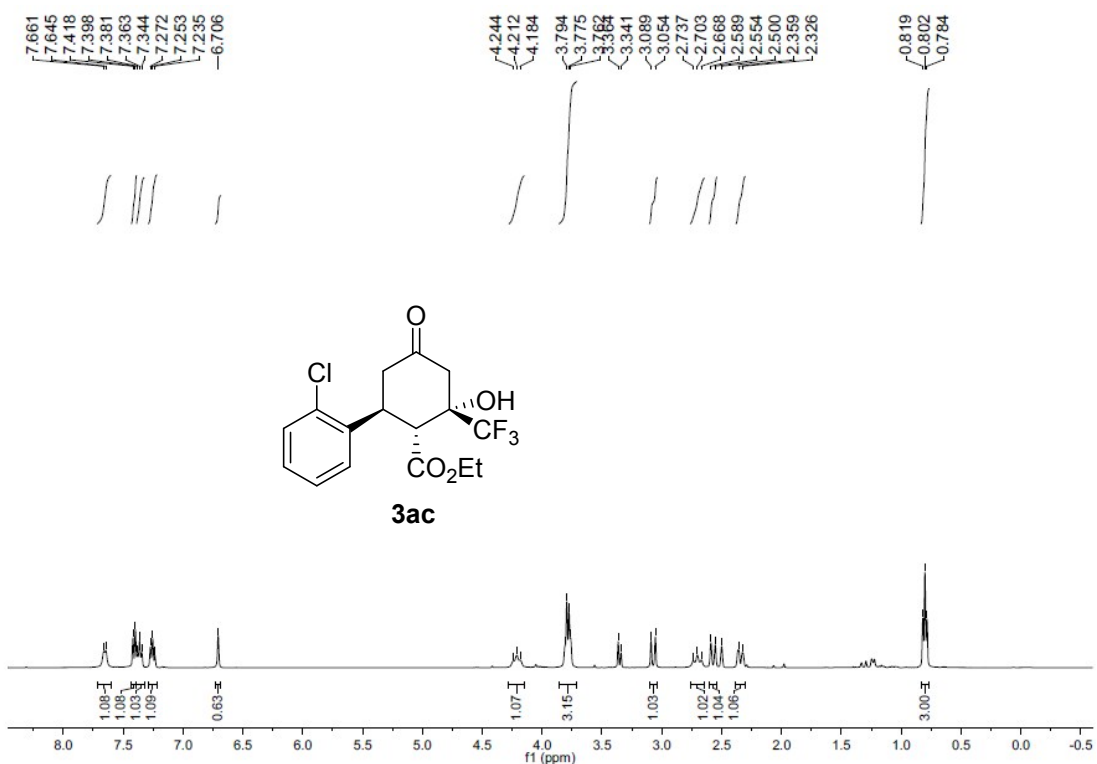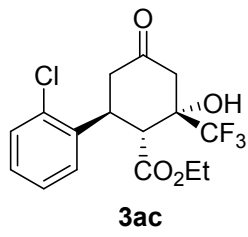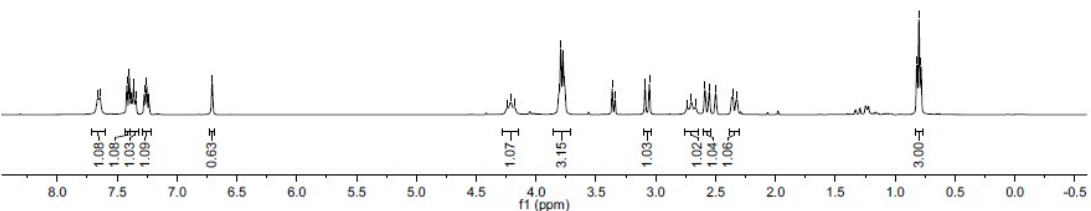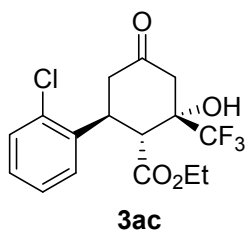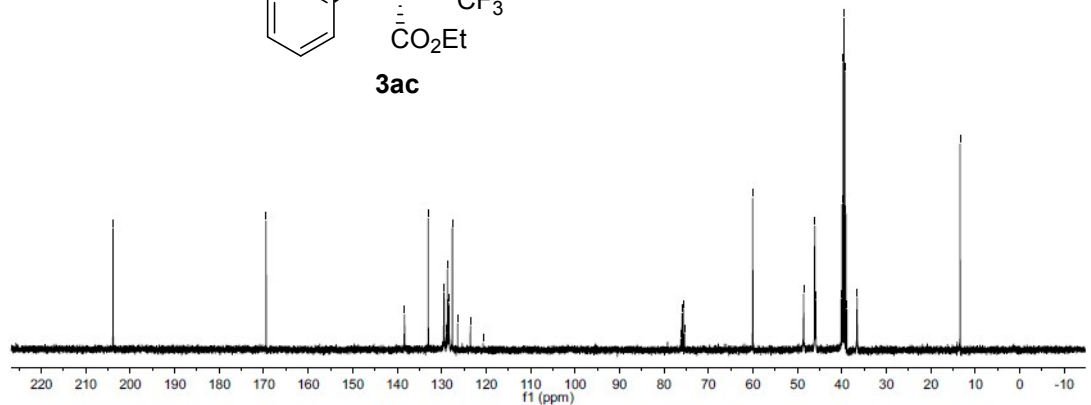

-81.323

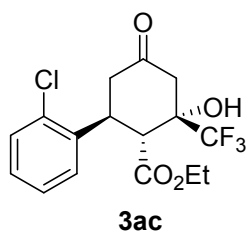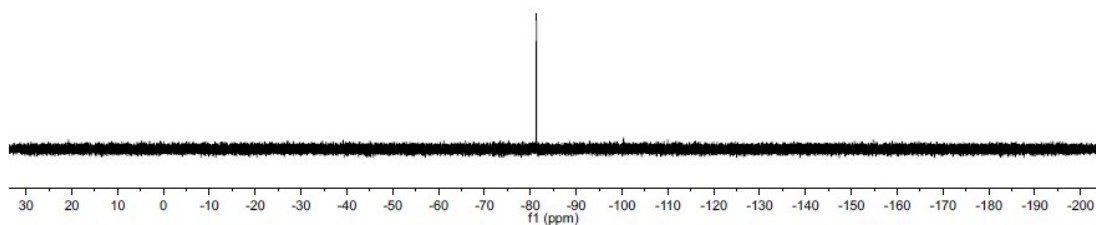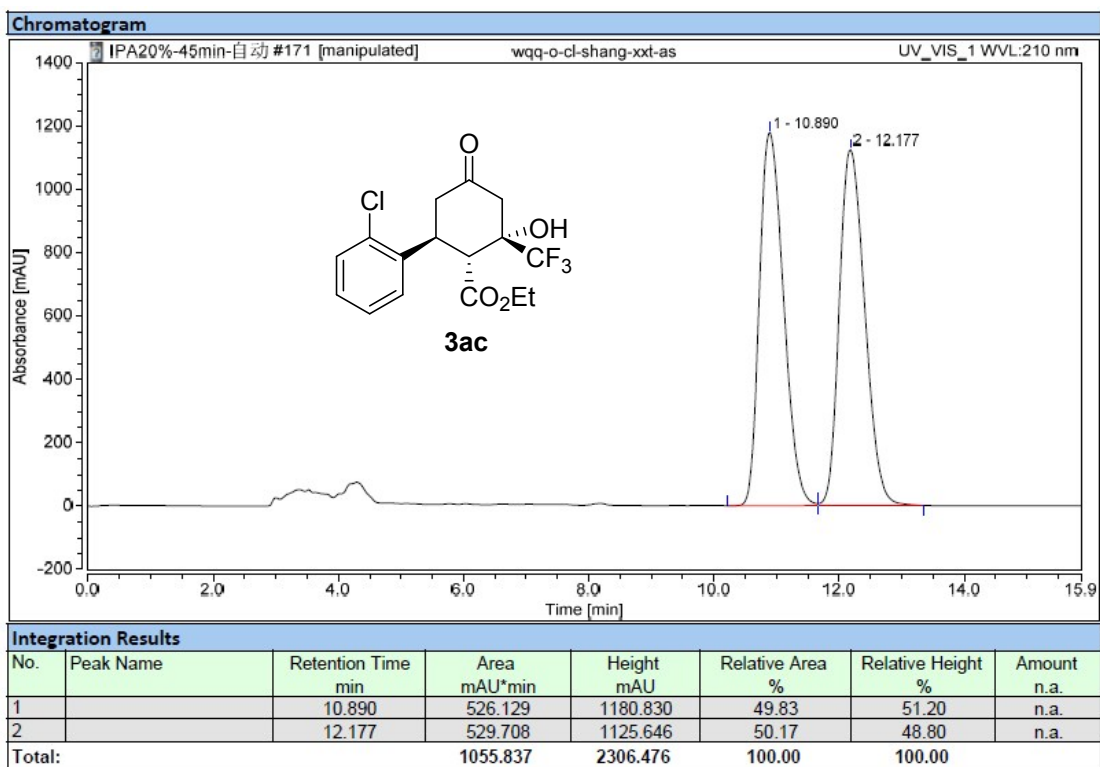

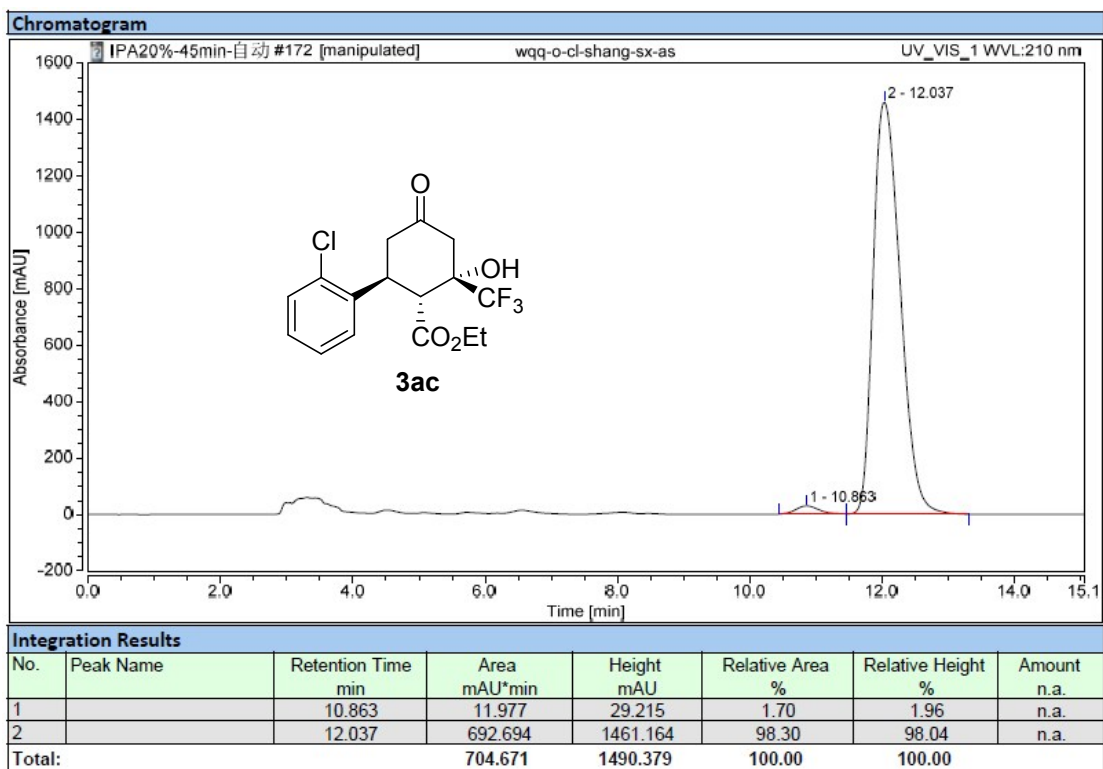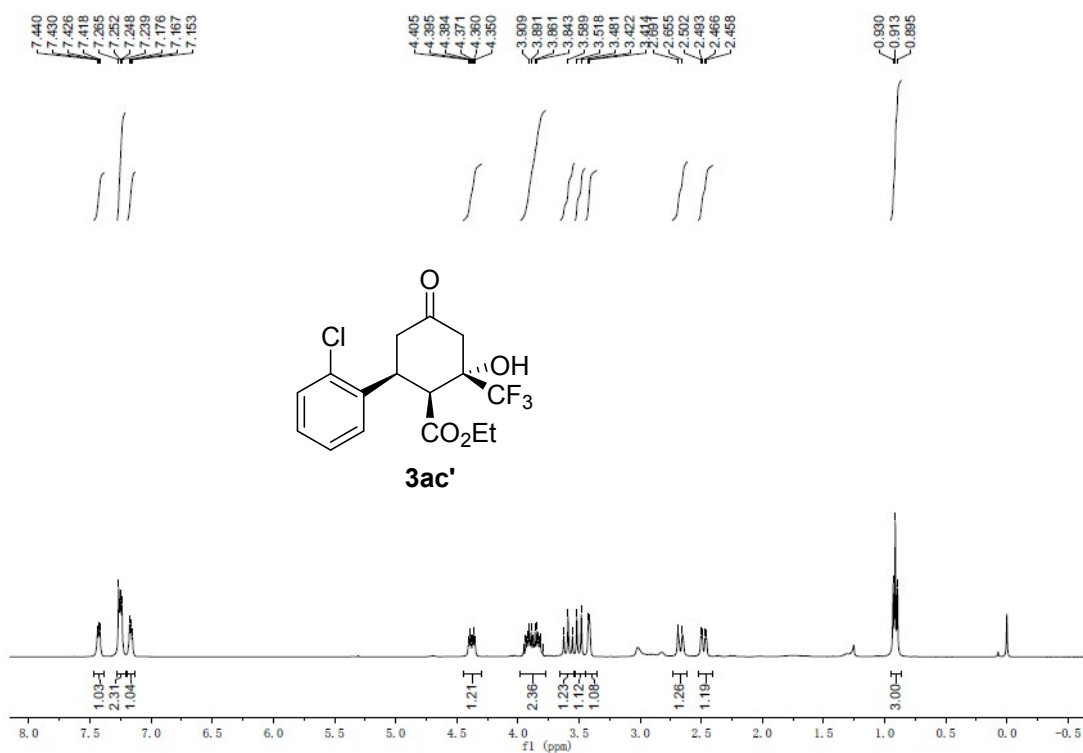

2-xia-13C

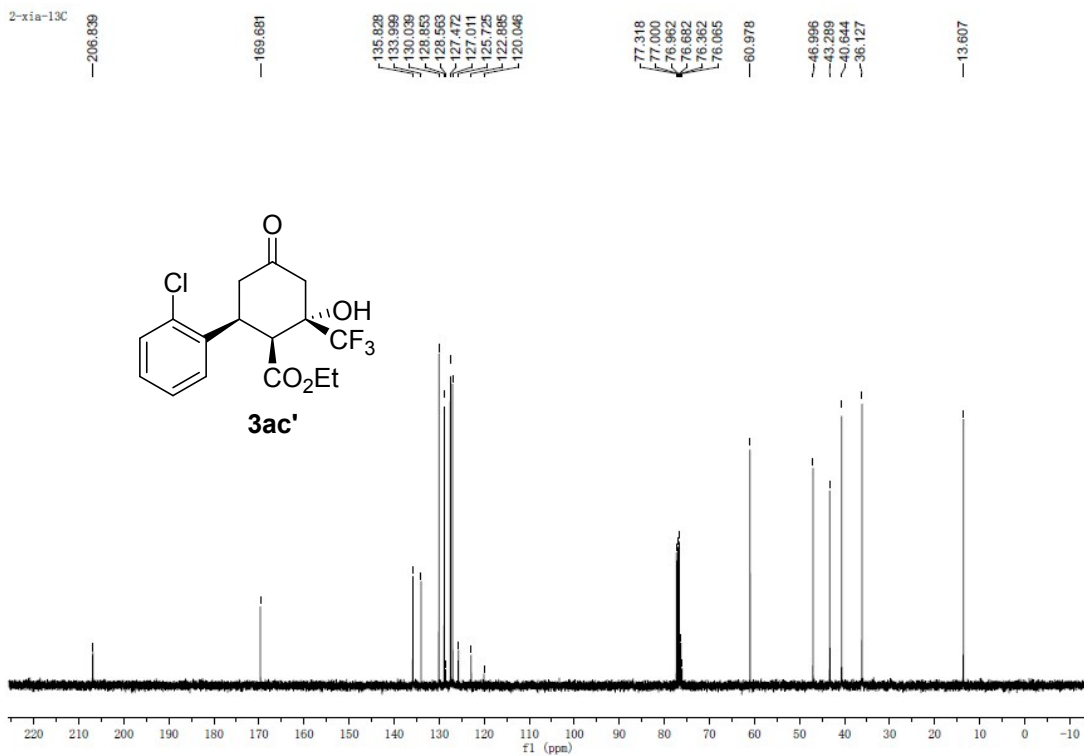

81.437

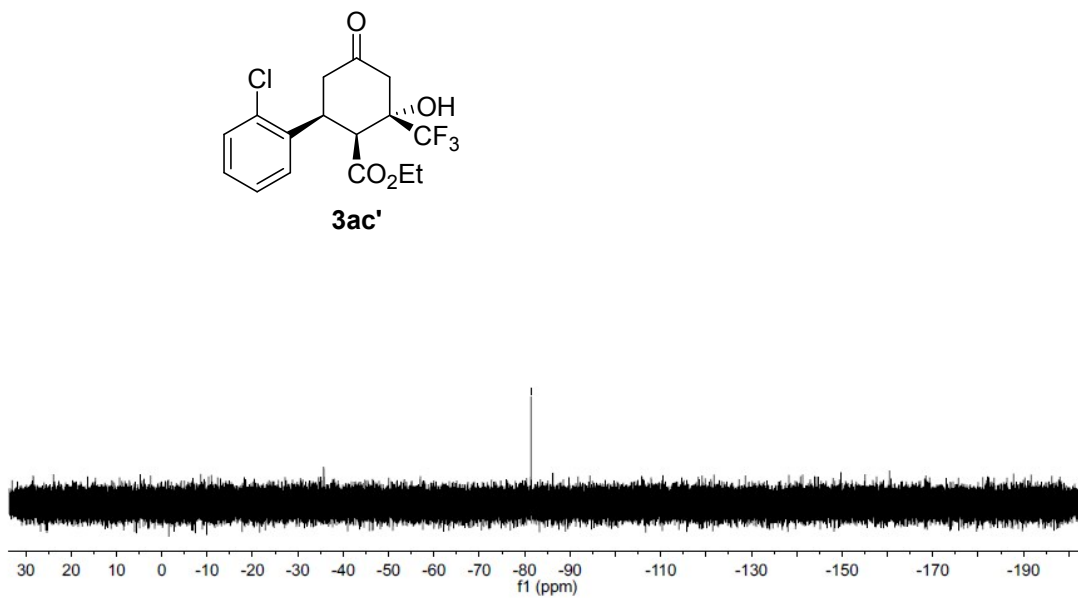

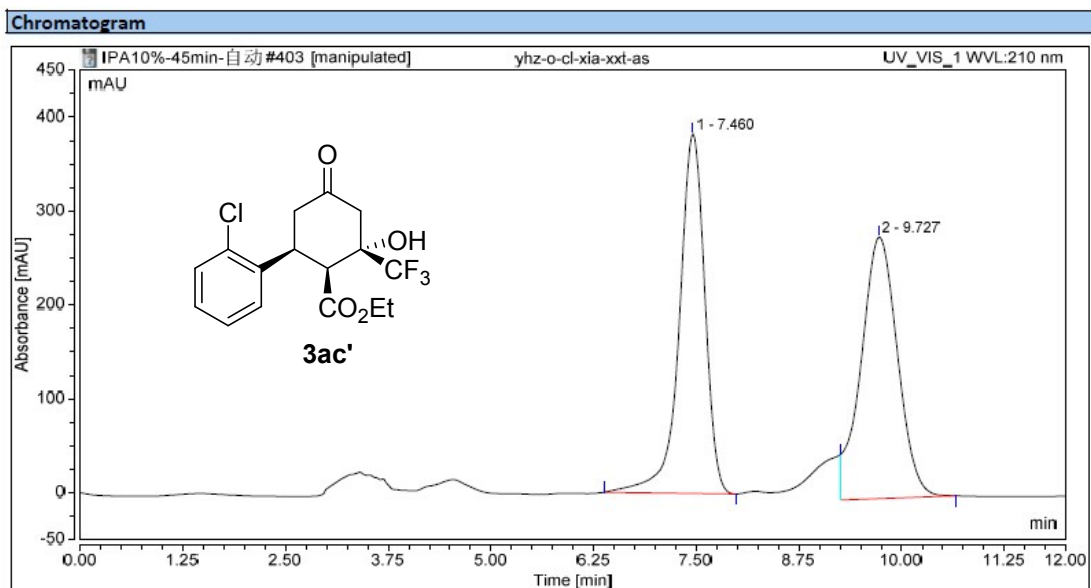

**Integration Results**

| No.           | Peak Name | Retention Time [min] | Area [mAU*min] | Height [mAU]   | Relative Area [%] | Relative Height [%] | Amount |
|---------------|-----------|----------------------|----------------|----------------|-------------------|---------------------|--------|
| 1             |           | 7.460                | 138.157        | 382.854        | 49.17             | 57.88               | n.a.   |
| 2             |           | 9.727                | 142.802        | 278.552        | 50.83             | 42.12               | n.a.   |
| <b>Total:</b> |           |                      | <b>280.960</b> | <b>661.406</b> | <b>100.00</b>     | <b>100.00</b>       |        |

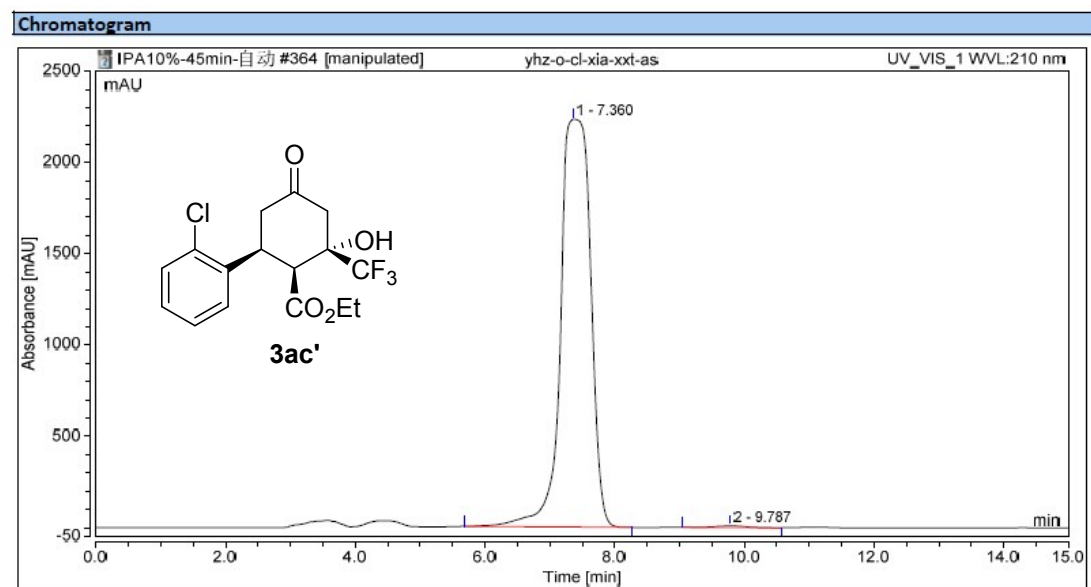

**Integration Results**

| No.           | Peak Name | Retention Time [min] | Area [mAU*min]  | Height [mAU]    | Relative Area [%] | Relative Height [%] | Amount |
|---------------|-----------|----------------------|-----------------|-----------------|-------------------|---------------------|--------|
| 1             |           | 7.360                | 1202.179        | 2235.219        | 99.58             | 99.57               | n.a.   |
| 2             |           | 9.787                | 5.022           | 9.682           | 0.42              | 0.43                | n.a.   |
| <b>Total:</b> |           |                      | <b>1207.201</b> | <b>2244.902</b> | <b>100.00</b>     | <b>100.00</b>       |        |

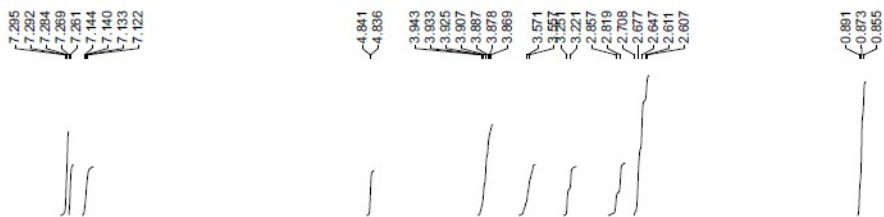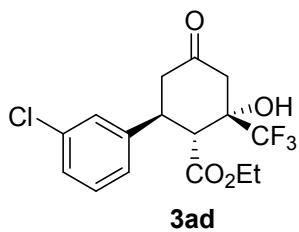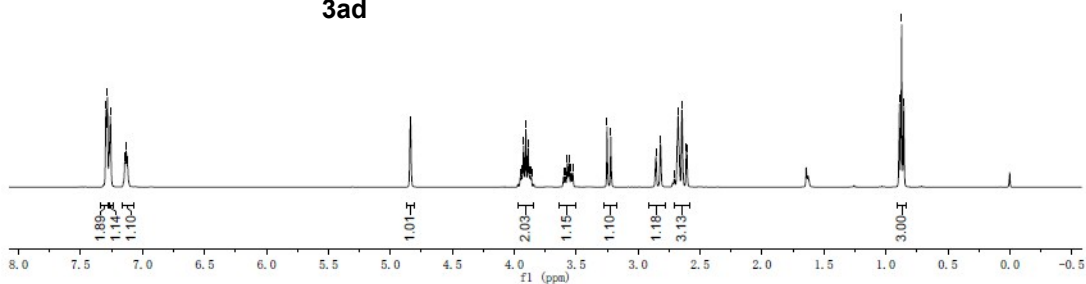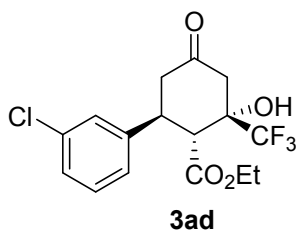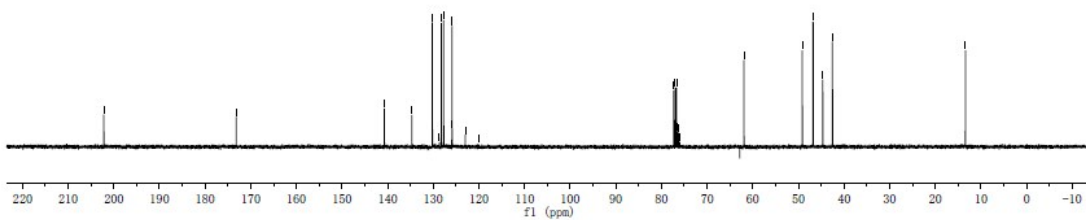

-81.326

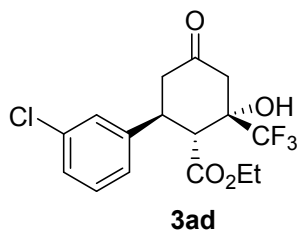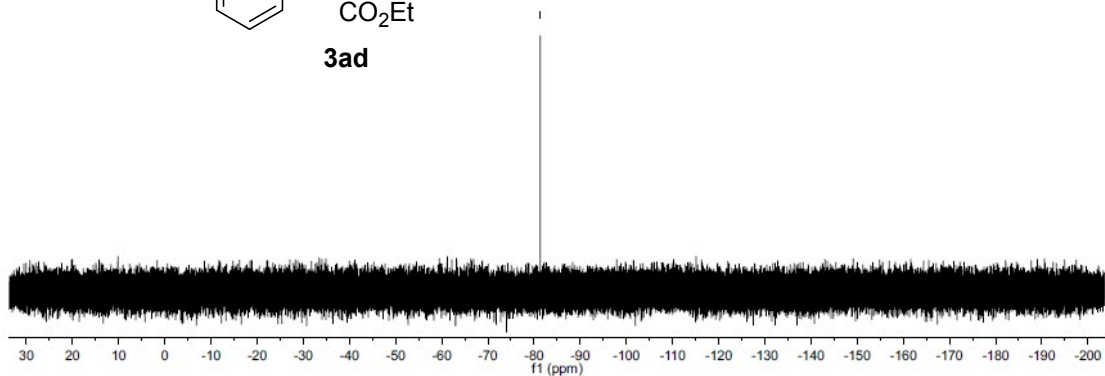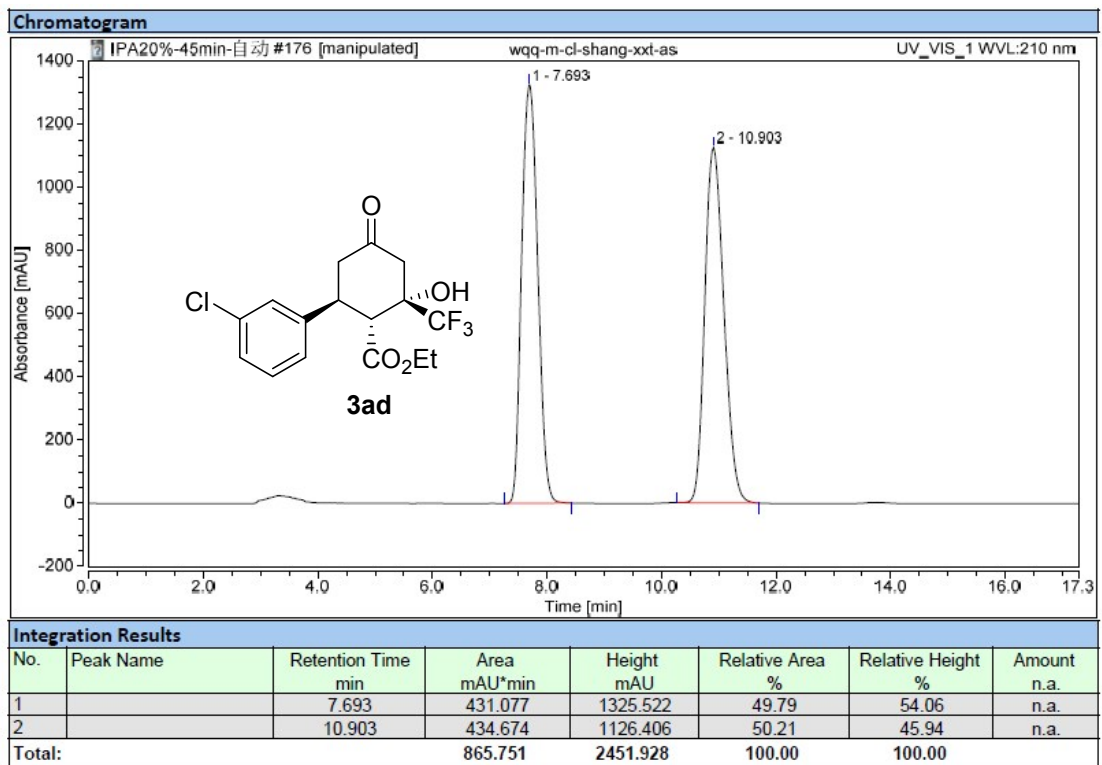



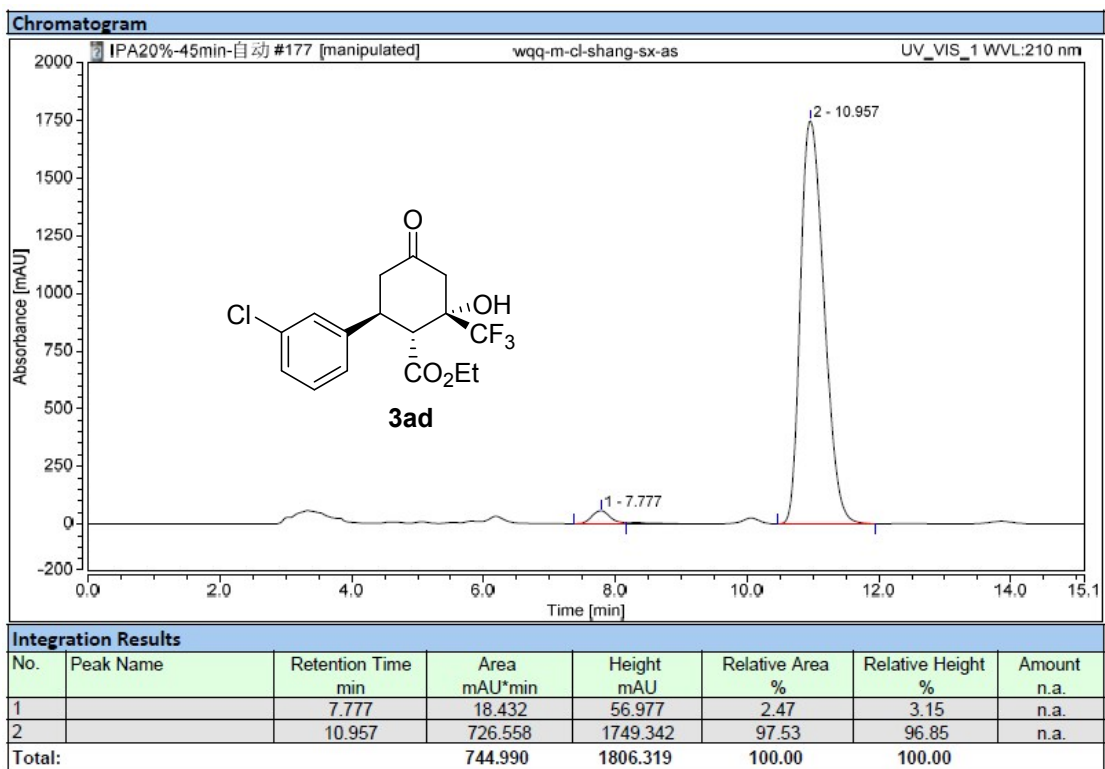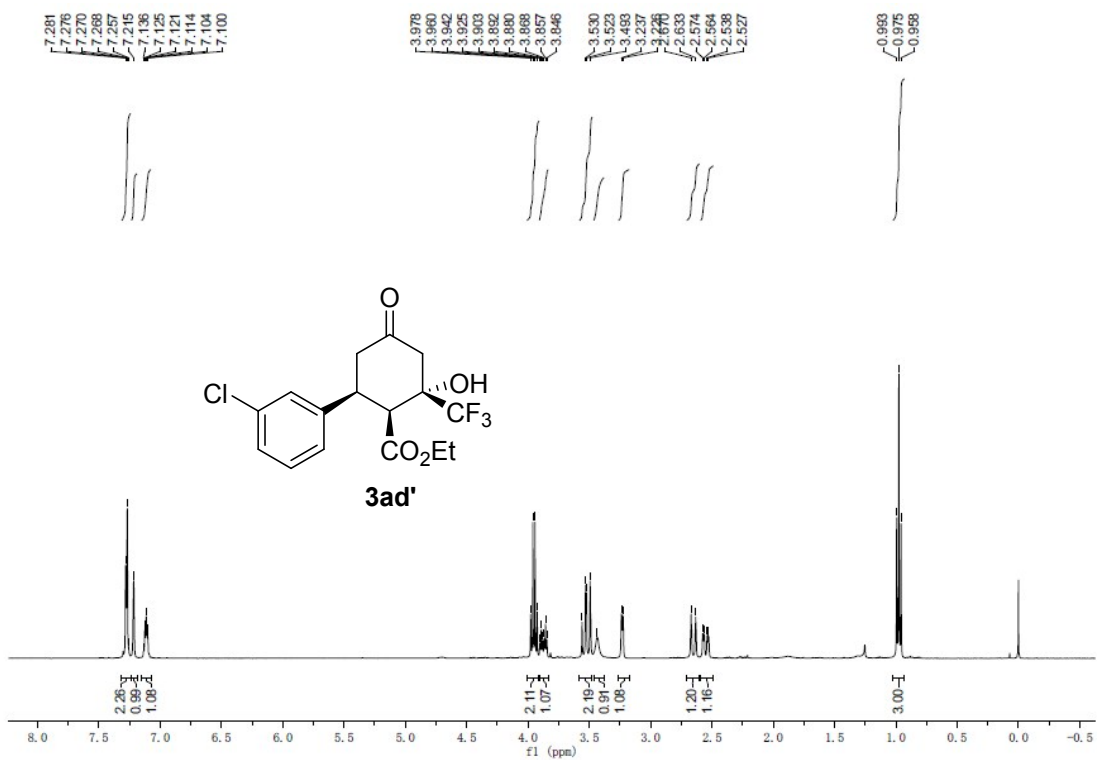

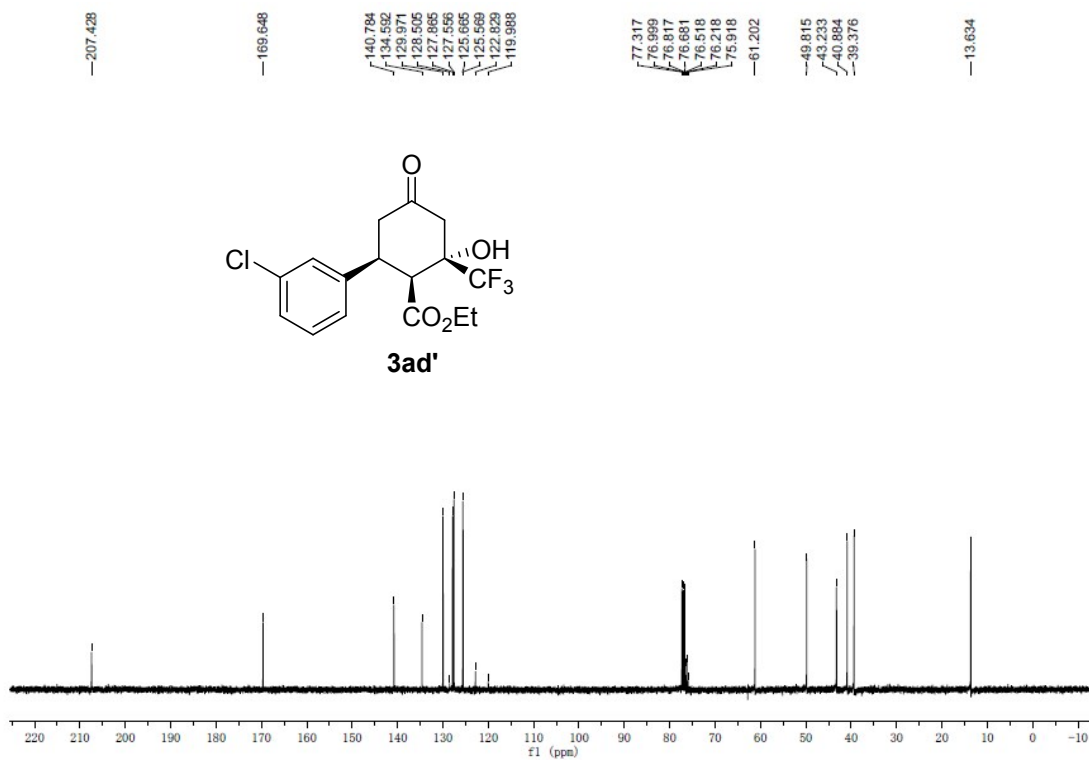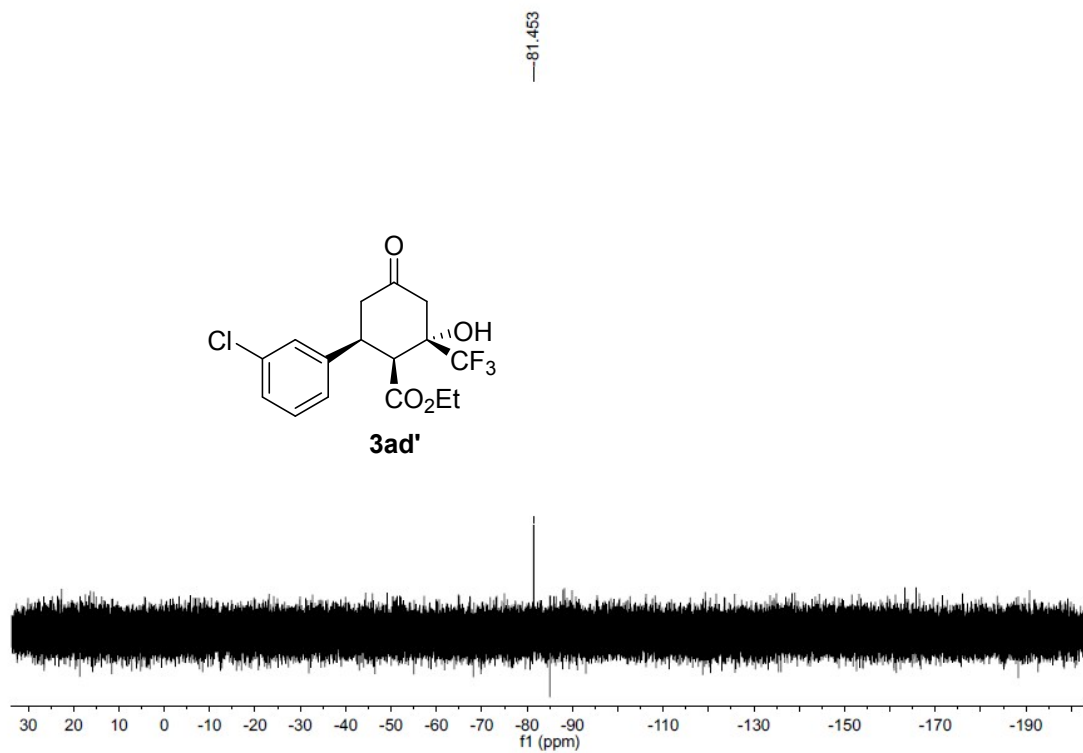

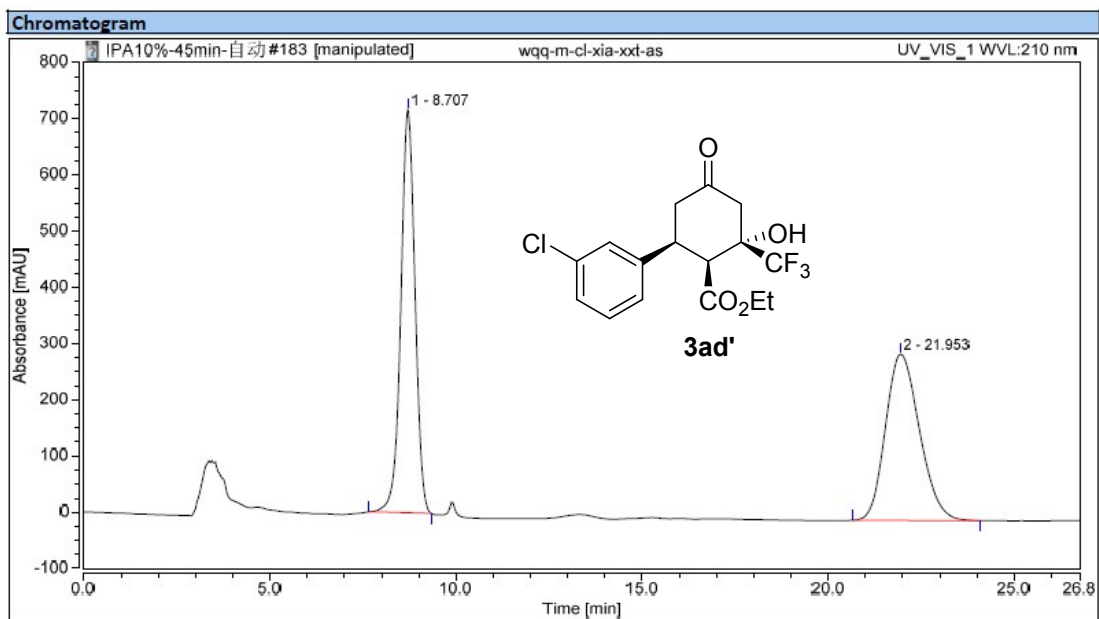

**Integration Results**

| No.           | Peak Name | Retention Time<br>min | Area<br>mAU*min | Height<br>mAU   | Relative Area<br>% | Relative Height<br>% | Amount |
|---------------|-----------|-----------------------|-----------------|-----------------|--------------------|----------------------|--------|
| 1             |           | 8.707                 | 316.606         | 717.271         | 50.31              | 70.82                | n.a.   |
| 2             |           | 21.953                | 312.710         | 295.602         | 49.69              | 29.18                | n.a.   |
| <b>Total:</b> |           |                       | <b>629.316</b>  | <b>1012.873</b> | <b>100.00</b>      | <b>100.00</b>        |        |

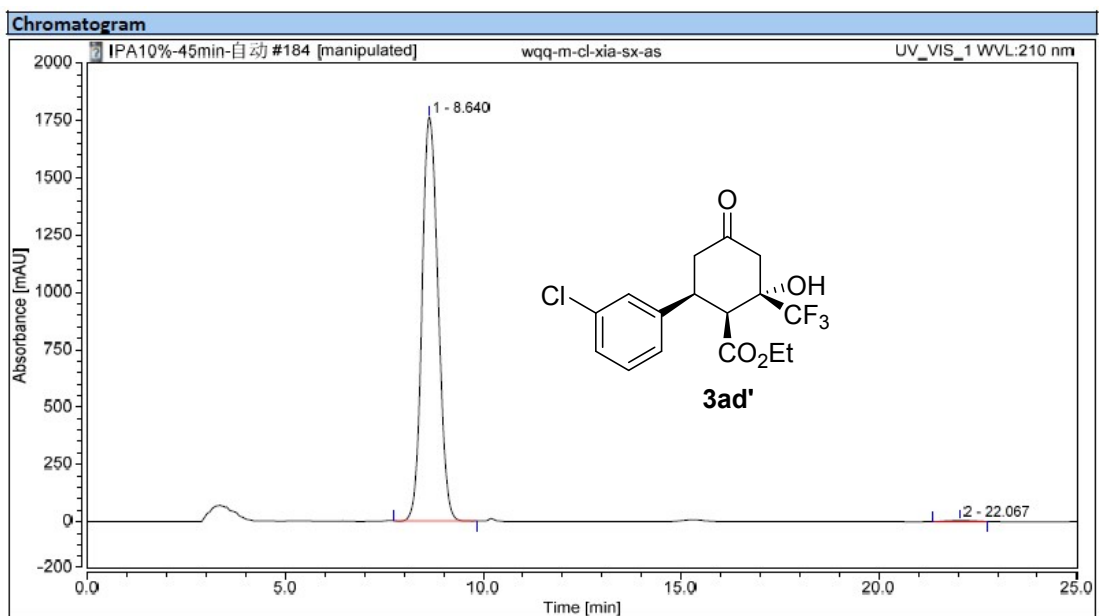

**Integration Results**

| No.           | Peak Name | Retention Time<br>min | Area<br>mAU*min | Height<br>mAU   | Relative Area<br>% | Relative Height<br>% | Amount |
|---------------|-----------|-----------------------|-----------------|-----------------|--------------------|----------------------|--------|
| 1             |           | 8.640                 | 827.101         | 1760.904        | 99.54              | 99.72                | n.a.   |
| 2             |           | 22.067                | 3.806           | 5.003           | 0.46               | 0.28                 | n.a.   |
| <b>Total:</b> |           |                       | <b>830.907</b>  | <b>1765.907</b> | <b>100.00</b>      | <b>100.00</b>        |        |

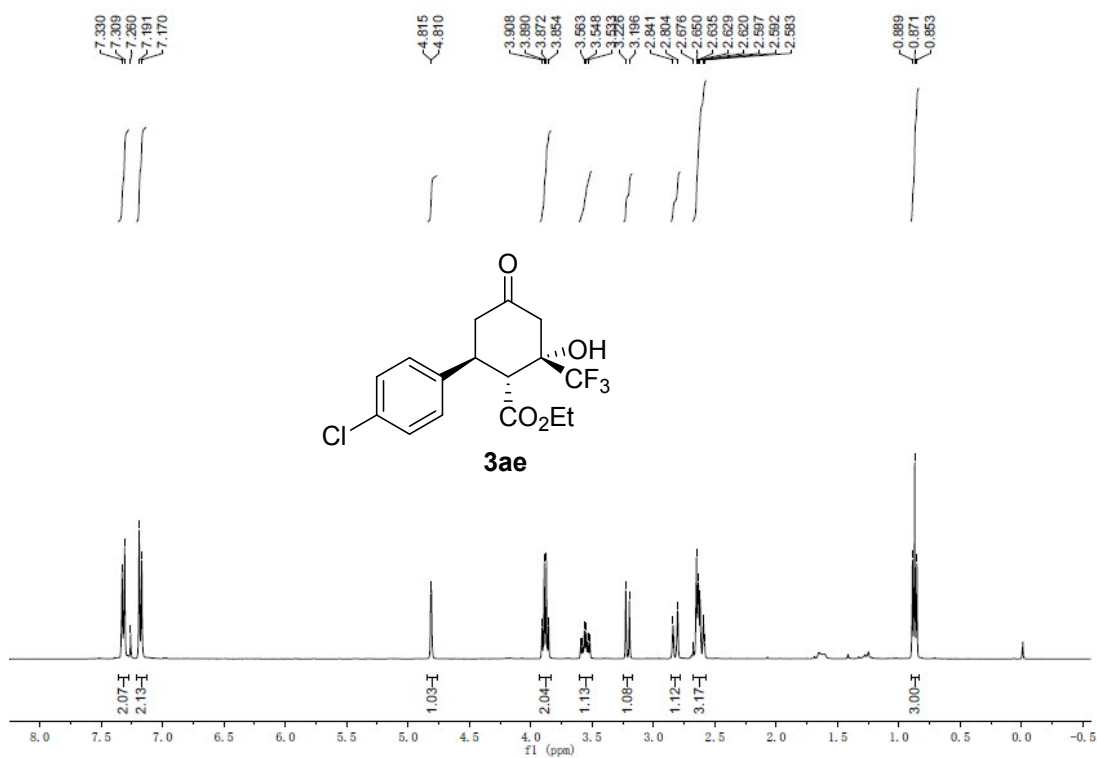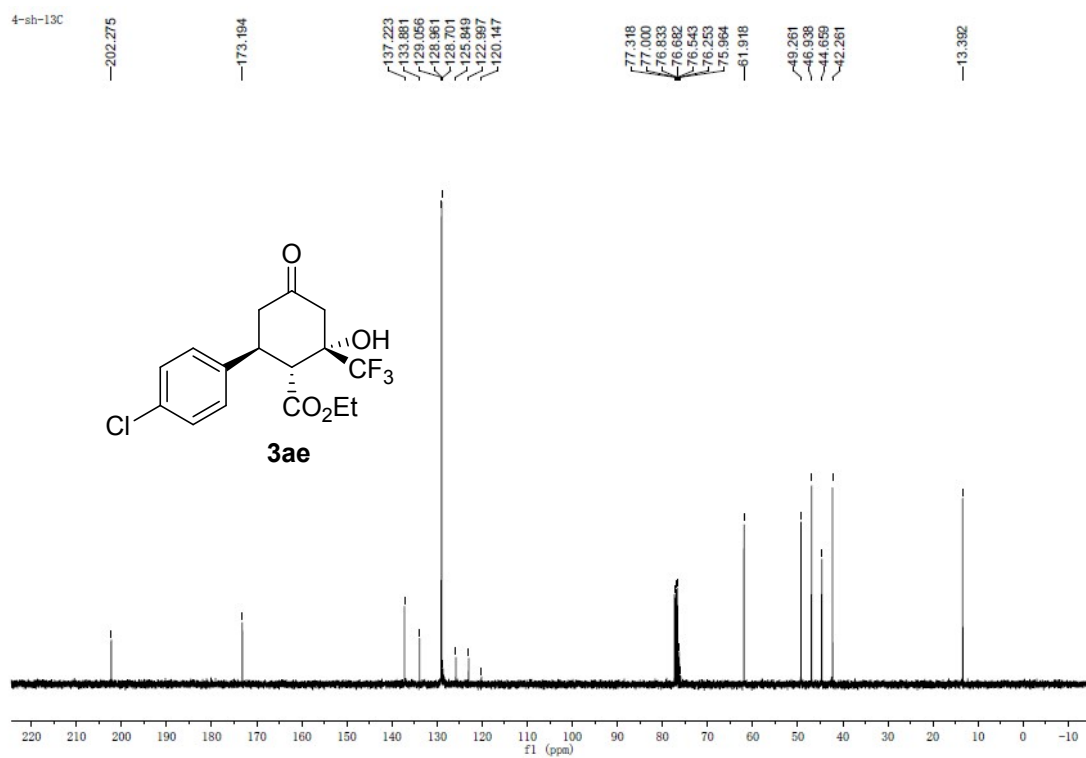

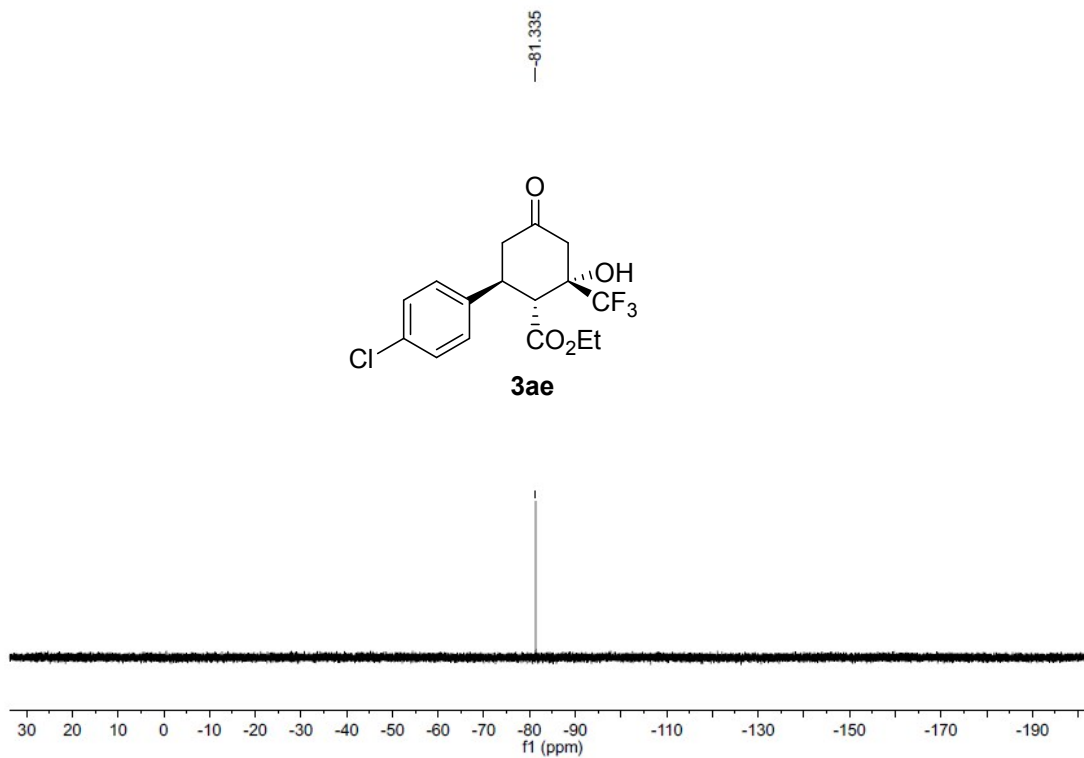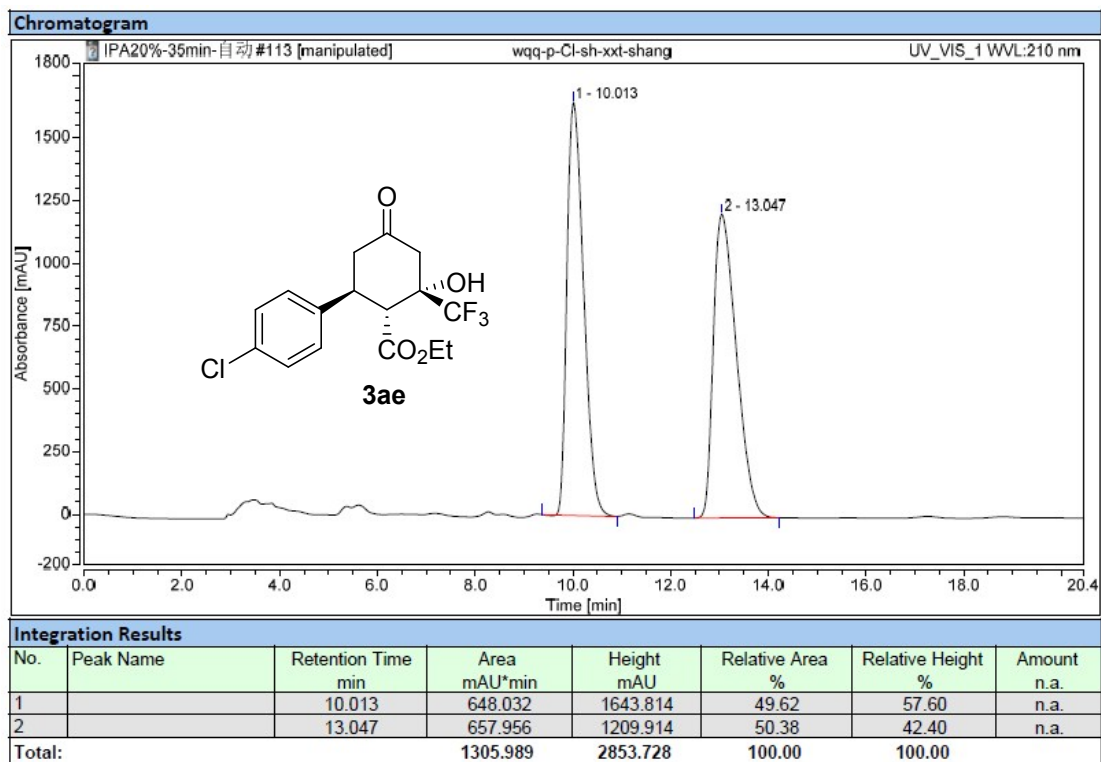

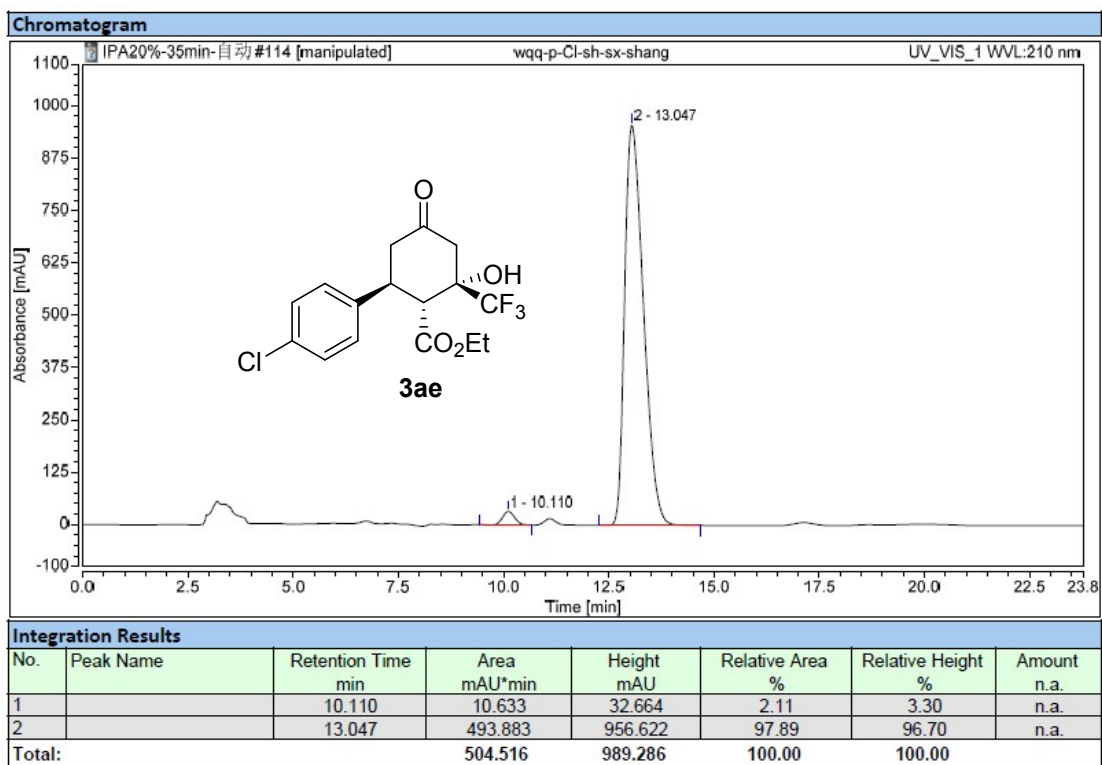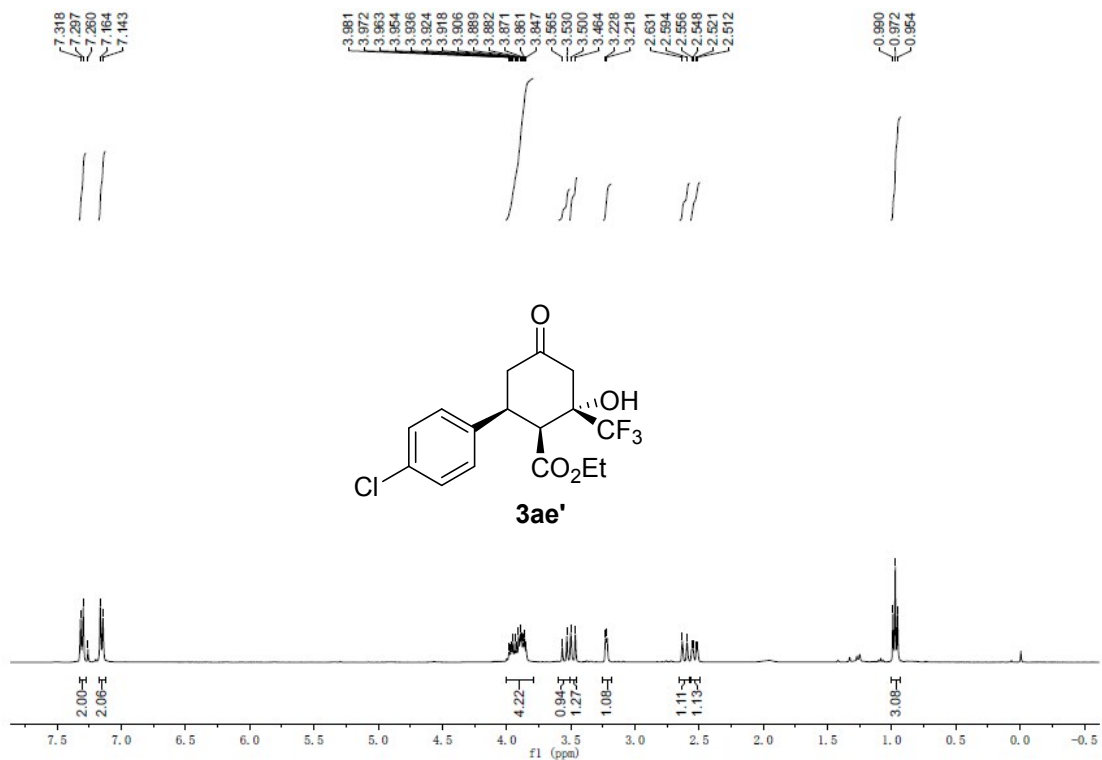

4-xis-13C  
—207.181

—169.670

137.202  
133.515  
128.851  
128.703  
128.508  
125.669  
122.831  
119.990

77.318  
77.000  
76.878  
76.682  
76.583  
76.283  
75.983  
—61.178

49.888  
43.283  
41.011  
38.126

—13.632

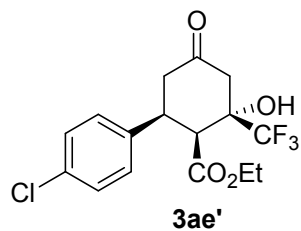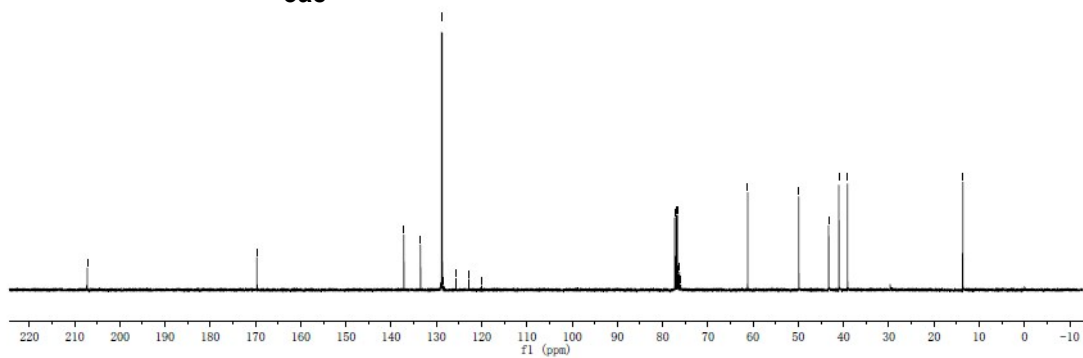

—81.430

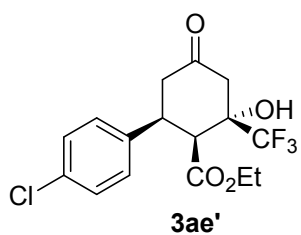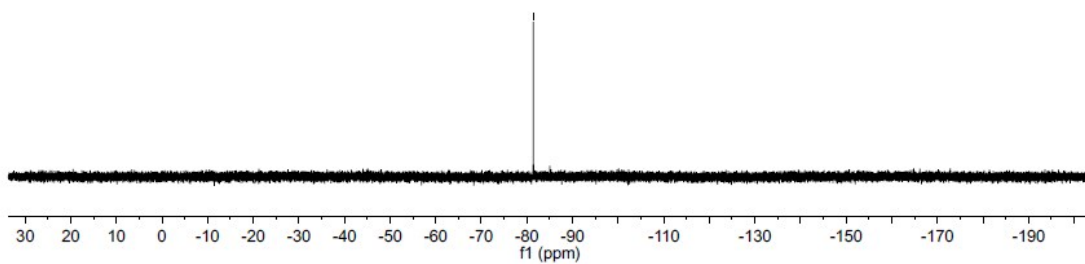

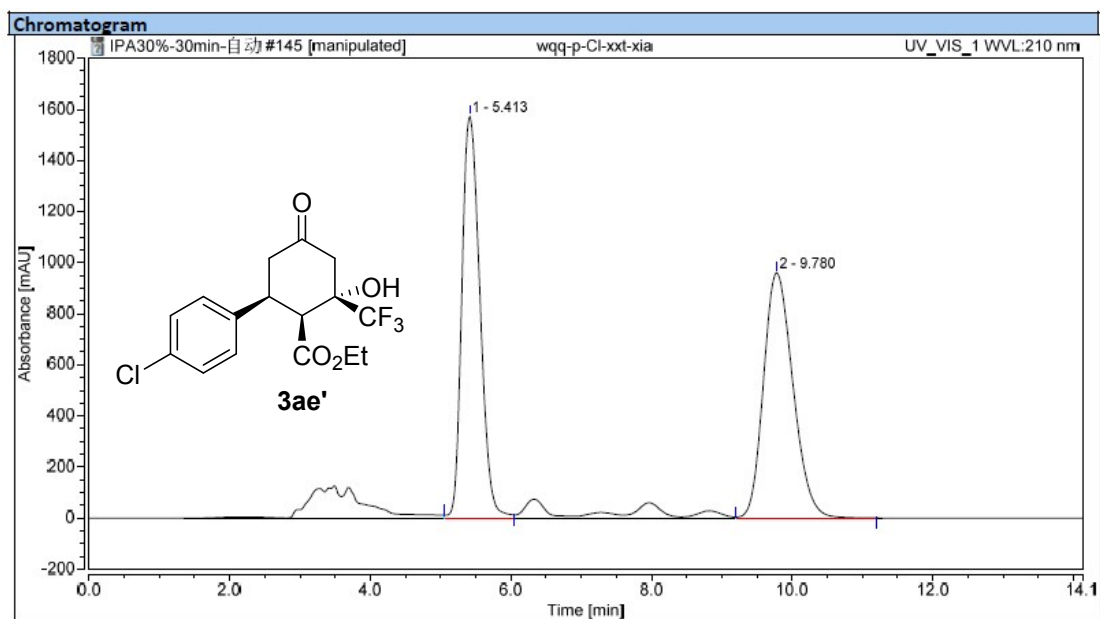

**Integration Results**

| No.    | Peak Name | Retention Time min | Area mAU*min | Height mAU | Relative Area % | Relative Height % | Amount |
|--------|-----------|--------------------|--------------|------------|-----------------|-------------------|--------|
| 1      |           | 5.413              | 466.895      | 1573.380   | 50.06           | 62.10             | n.a.   |
| 2      |           | 9.780              | 465.817      | 960.250    | 49.94           | 37.90             | n.a.   |
| Total: |           |                    | 932.711      | 2533.630   | 100.00          | 100.00            |        |

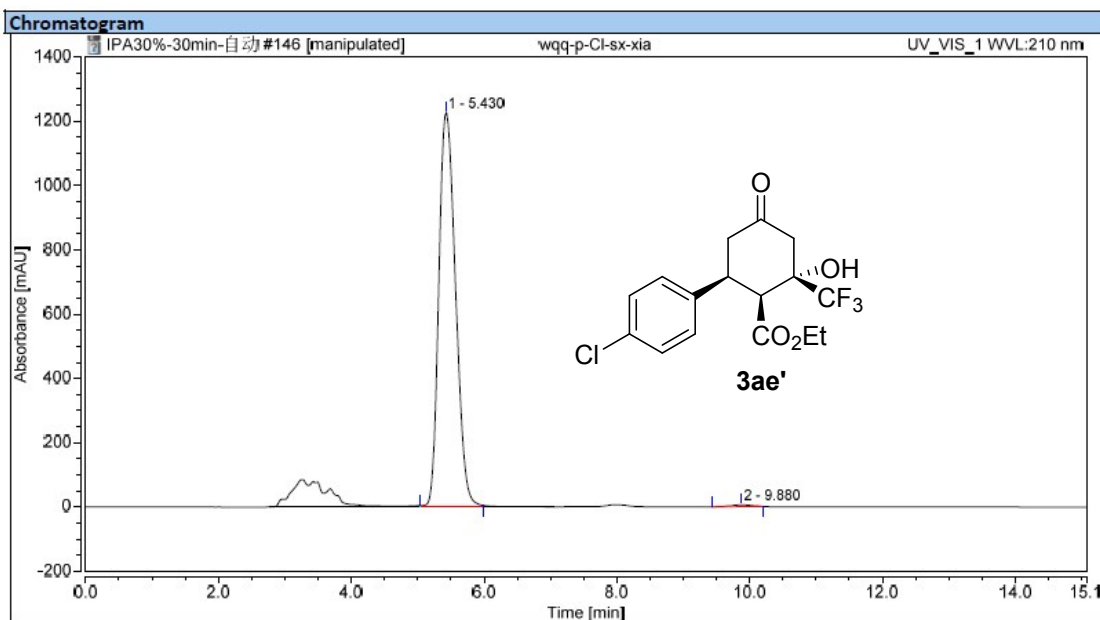

**Integration Results**

| No.    | Peak Name | Retention Time min | Area mAU*min | Height mAU | Relative Area % | Relative Height % | Amount |
|--------|-----------|--------------------|--------------|------------|-----------------|-------------------|--------|
| 1      |           | 5.430              | 358.055      | 1226.727   | 99.42           | 99.56             | n.a.   |
| 2      |           | 9.880              | 2.094        | 5.375      | 0.58            | 0.44              | n.a.   |
| Total: |           |                    | 360.149      | 1232.102   | 100.00          | 100.00            |        |



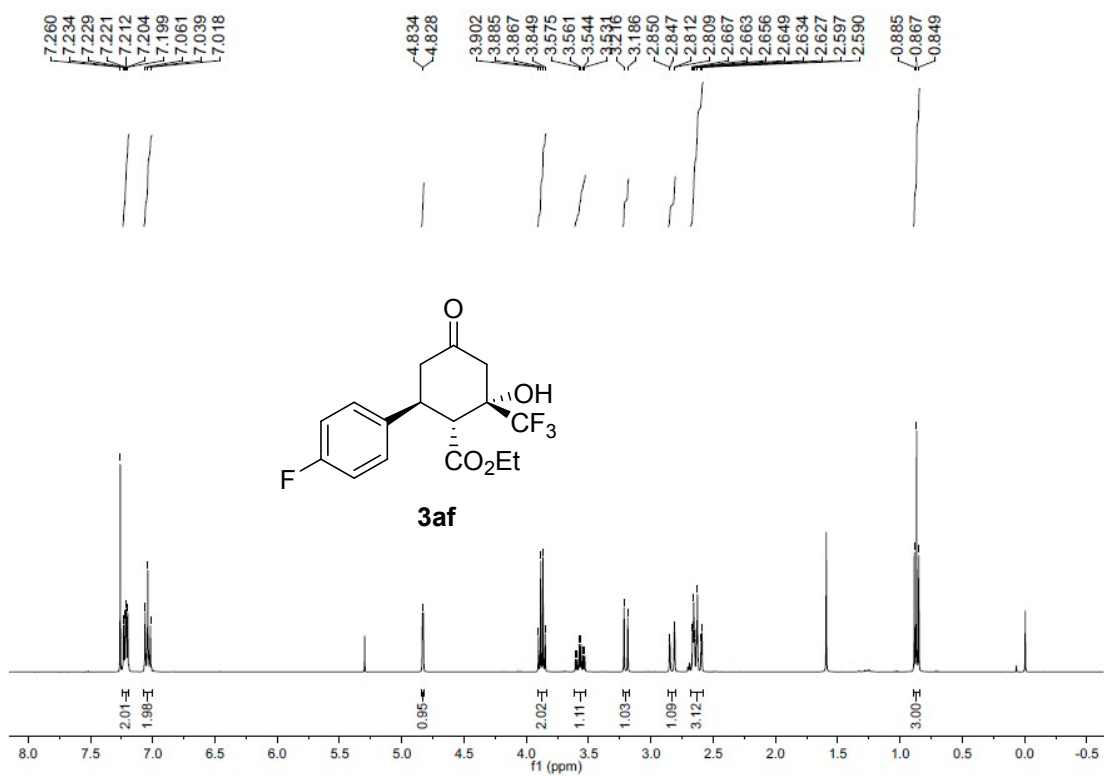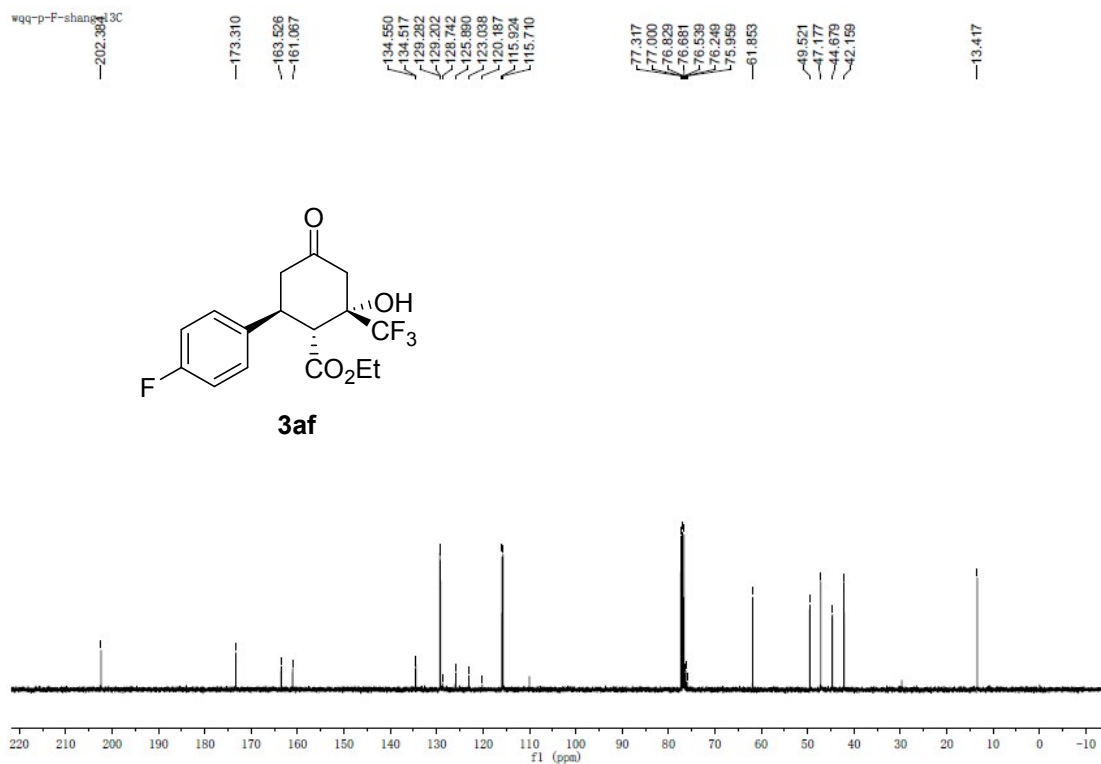

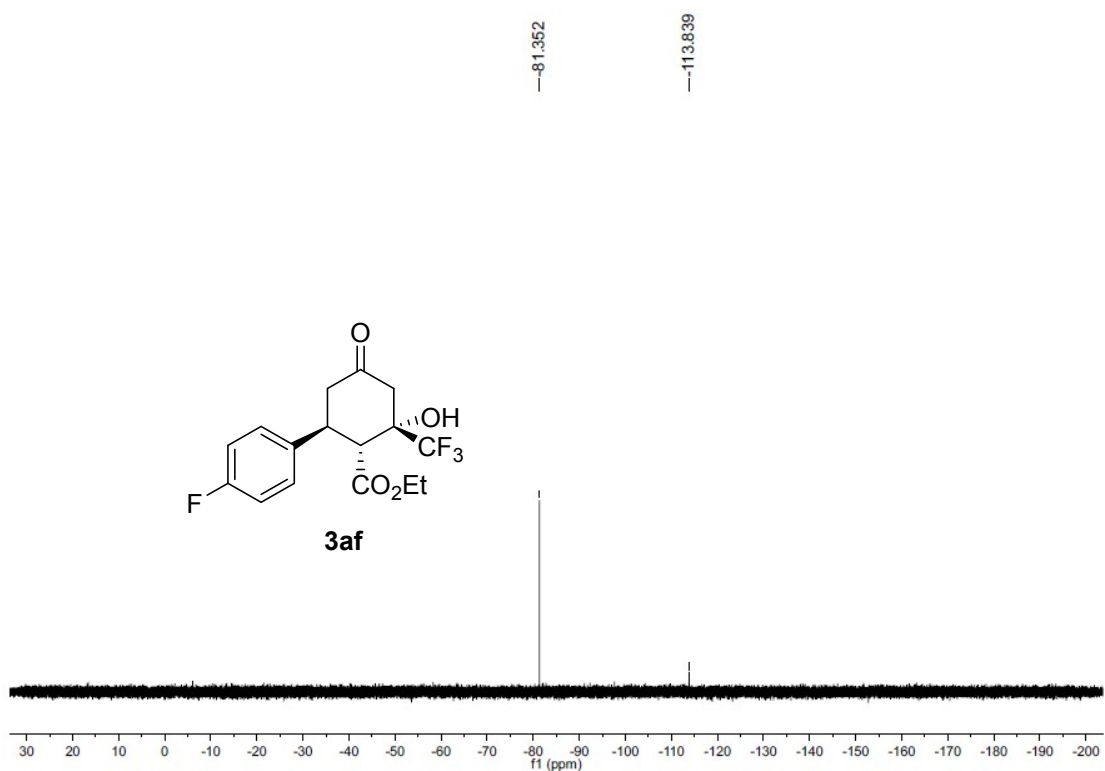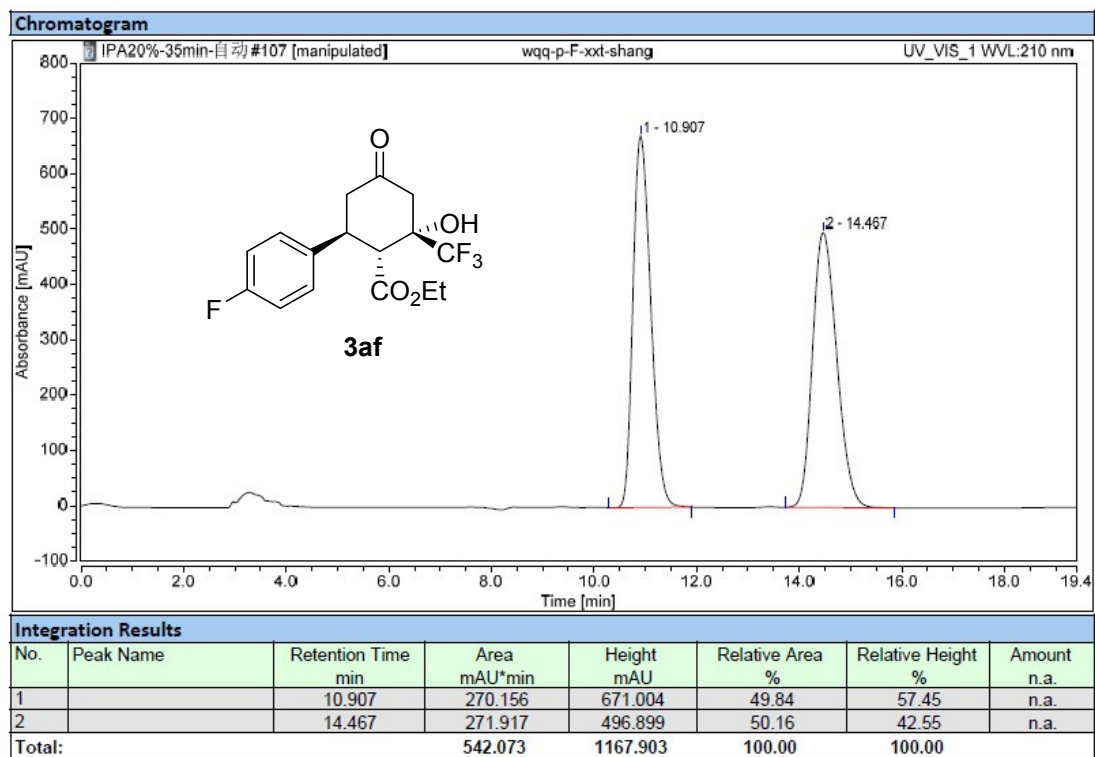

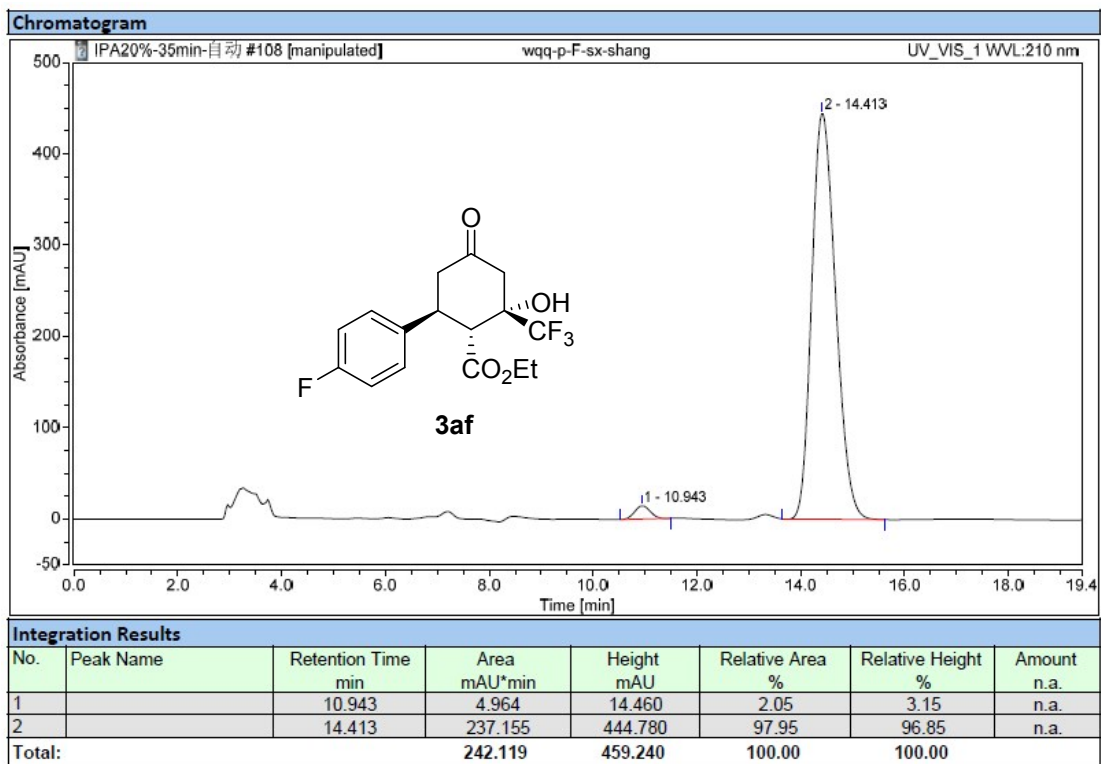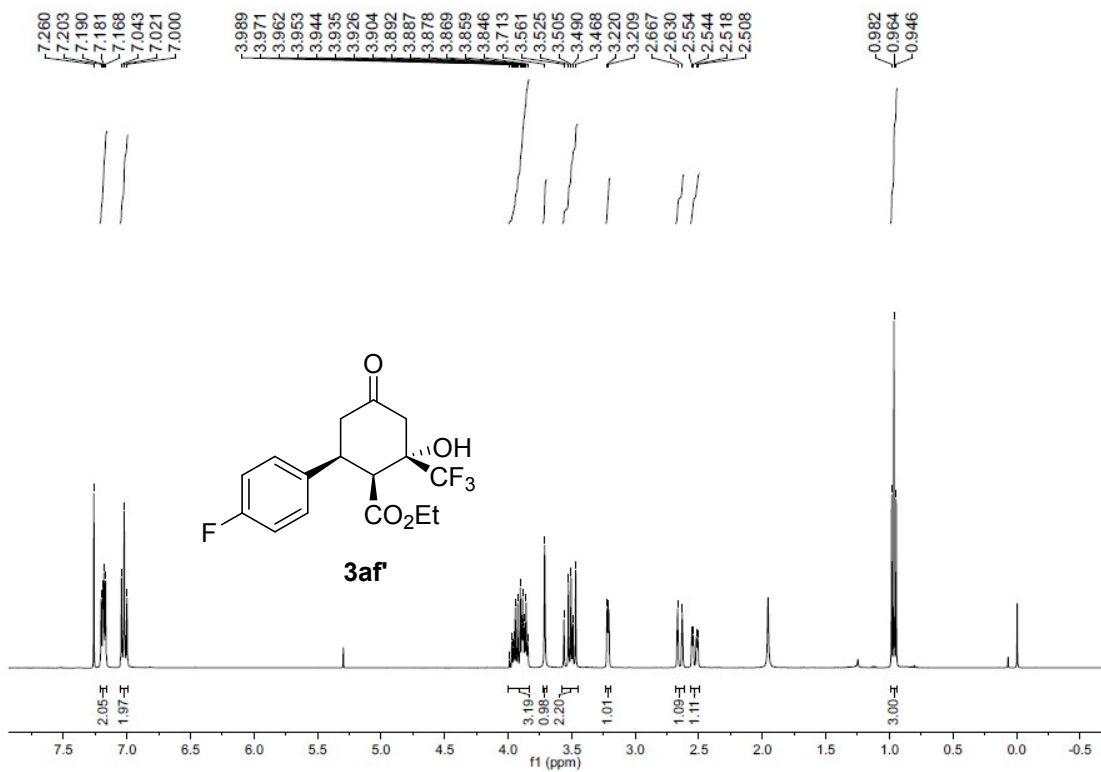

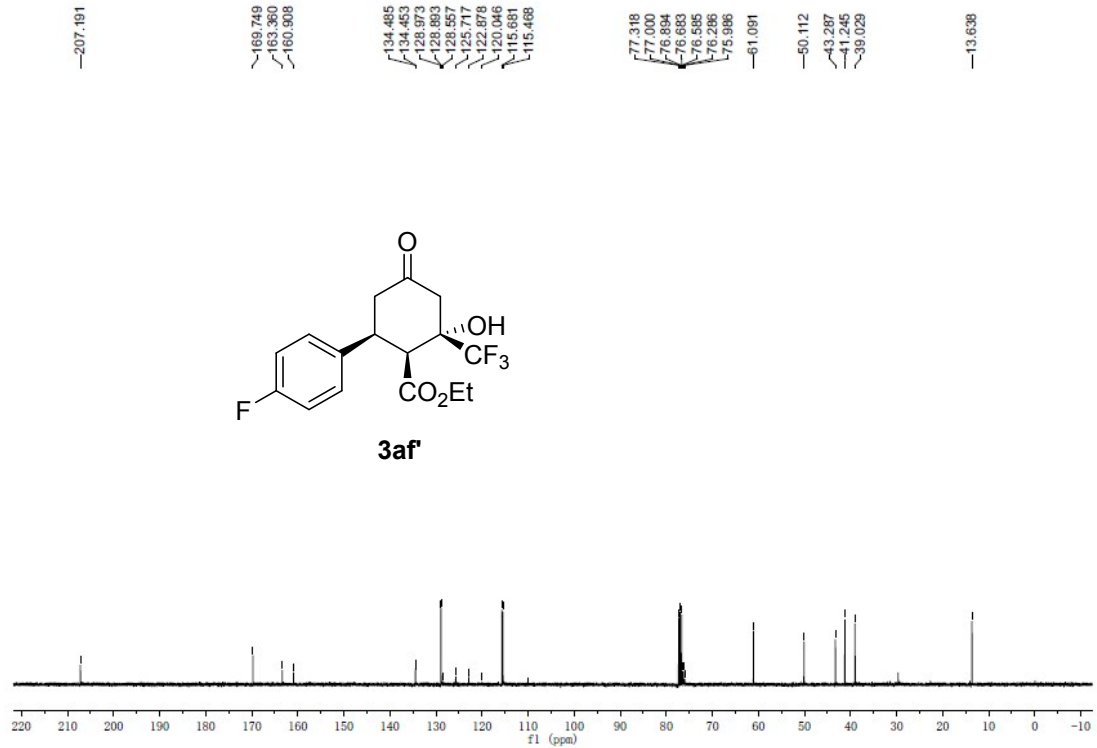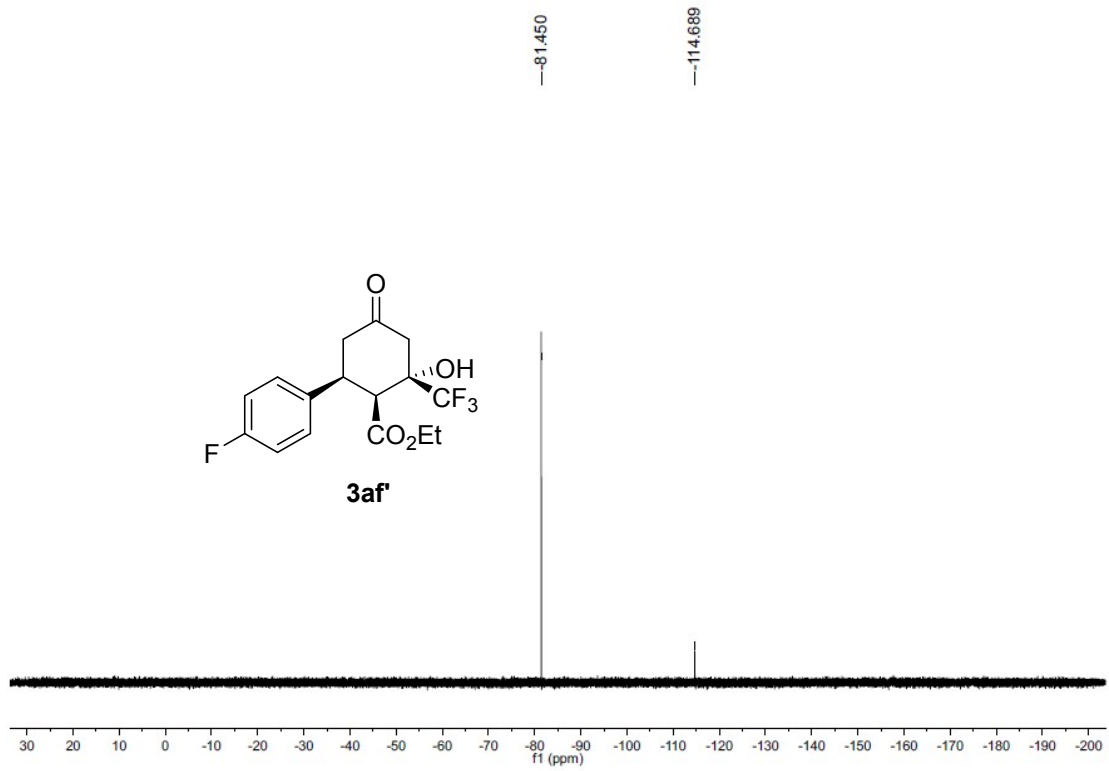

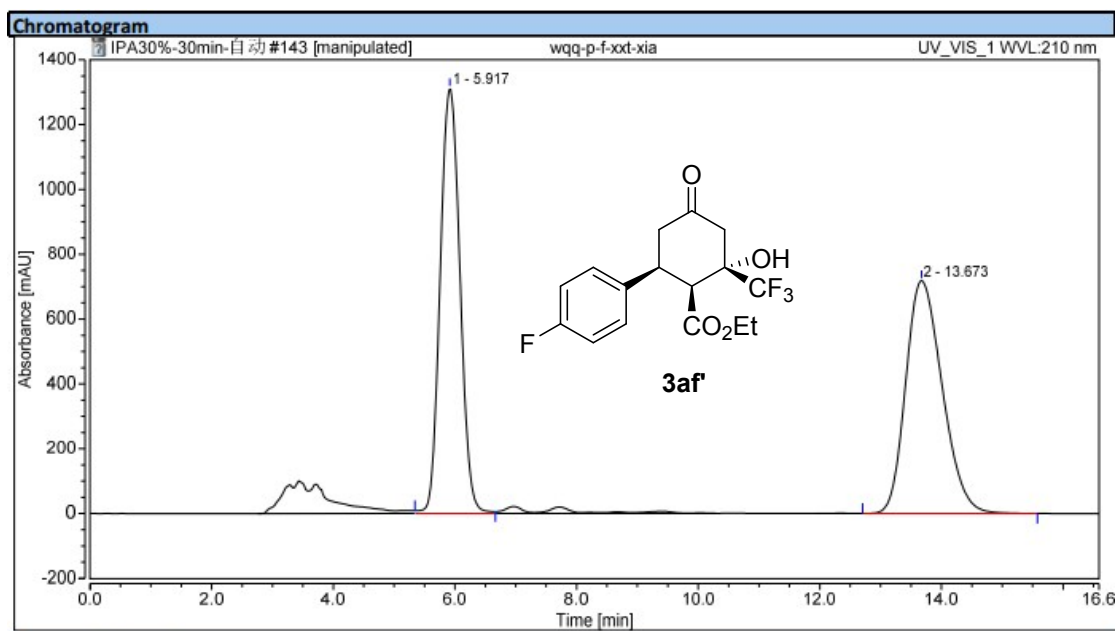

**Integration Results**

| No.           | Peak Name | Retention Time<br>min | Area<br>mAU*min | Height<br>mAU   | Relative Area<br>% | Relative Height<br>% | Amount<br>n.a. |
|---------------|-----------|-----------------------|-----------------|-----------------|--------------------|----------------------|----------------|
| 1             |           | 5.917                 | 494.140         | 1311.236        | 49.75              | 64.59                | n.a.           |
| 2             |           | 13.673                | 499.072         | 718.805         | 50.25              | 35.41                | n.a.           |
| <b>Total:</b> |           |                       | <b>993.212</b>  | <b>2030.041</b> | <b>100.00</b>      | <b>100.00</b>        |                |

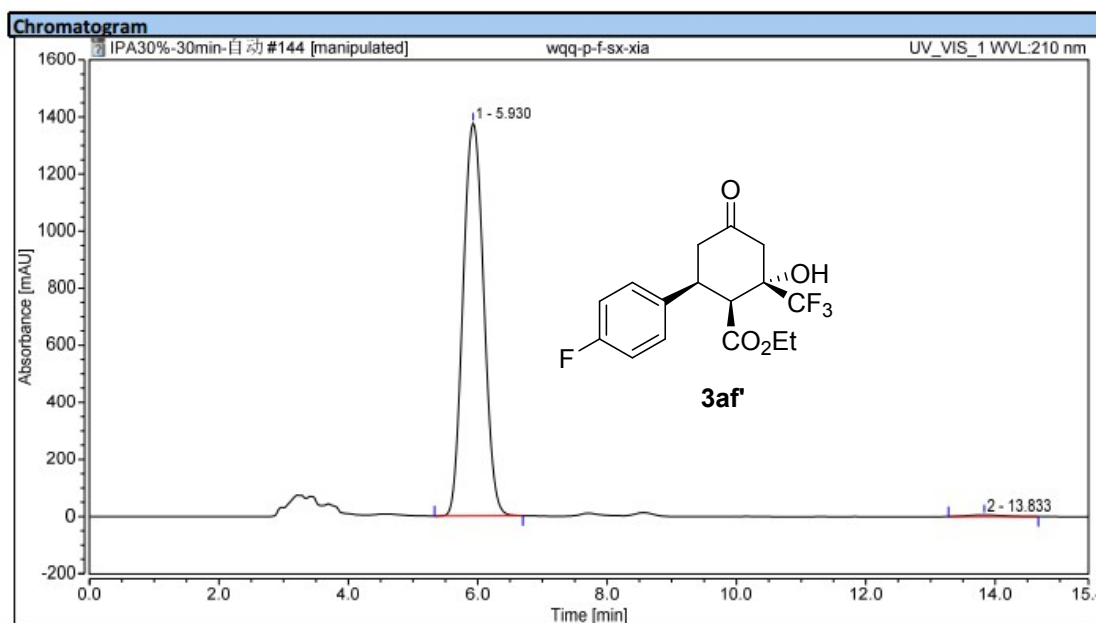

**Integration Results**

| No.           | Peak Name | Retention Time<br>min | Area<br>mAU*min | Height<br>mAU   | Relative Area<br>% | Relative Height<br>% | Amount<br>n.a. |
|---------------|-----------|-----------------------|-----------------|-----------------|--------------------|----------------------|----------------|
| 1             |           | 5.930                 | 506.143         | 1376.448        | 99.30              | 99.58                | n.a.           |
| 2             |           | 13.833                | 3.580           | 5.838           | 0.70               | 0.42                 | n.a.           |
| <b>Total:</b> |           |                       | <b>509.723</b>  | <b>1382.285</b> | <b>100.00</b>      | <b>100.00</b>        |                |

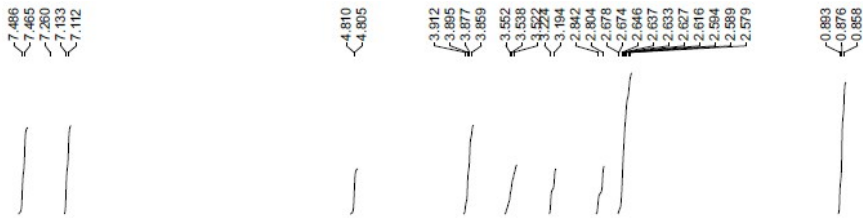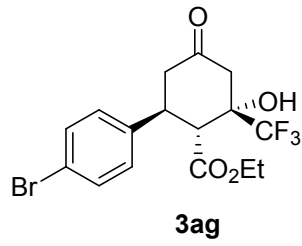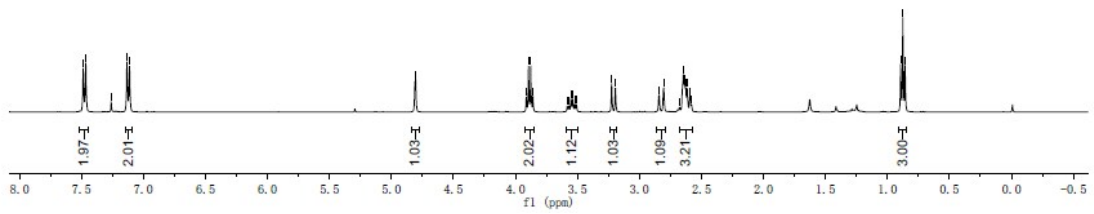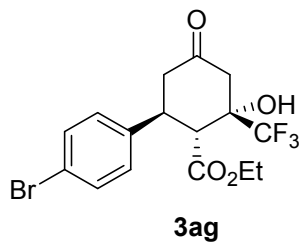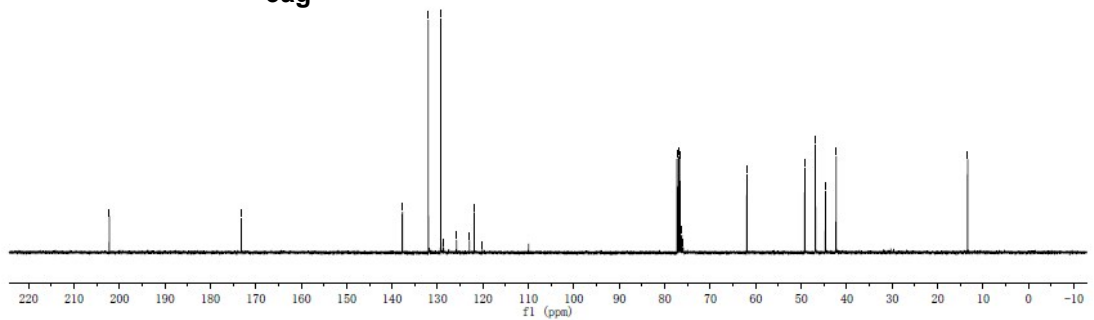

—81.331

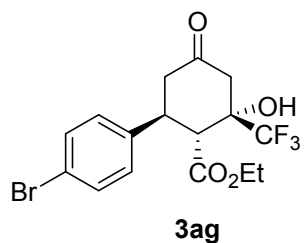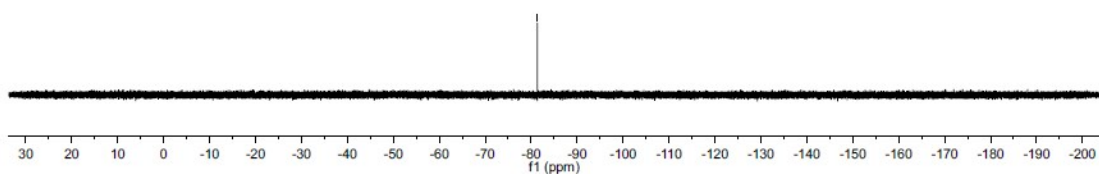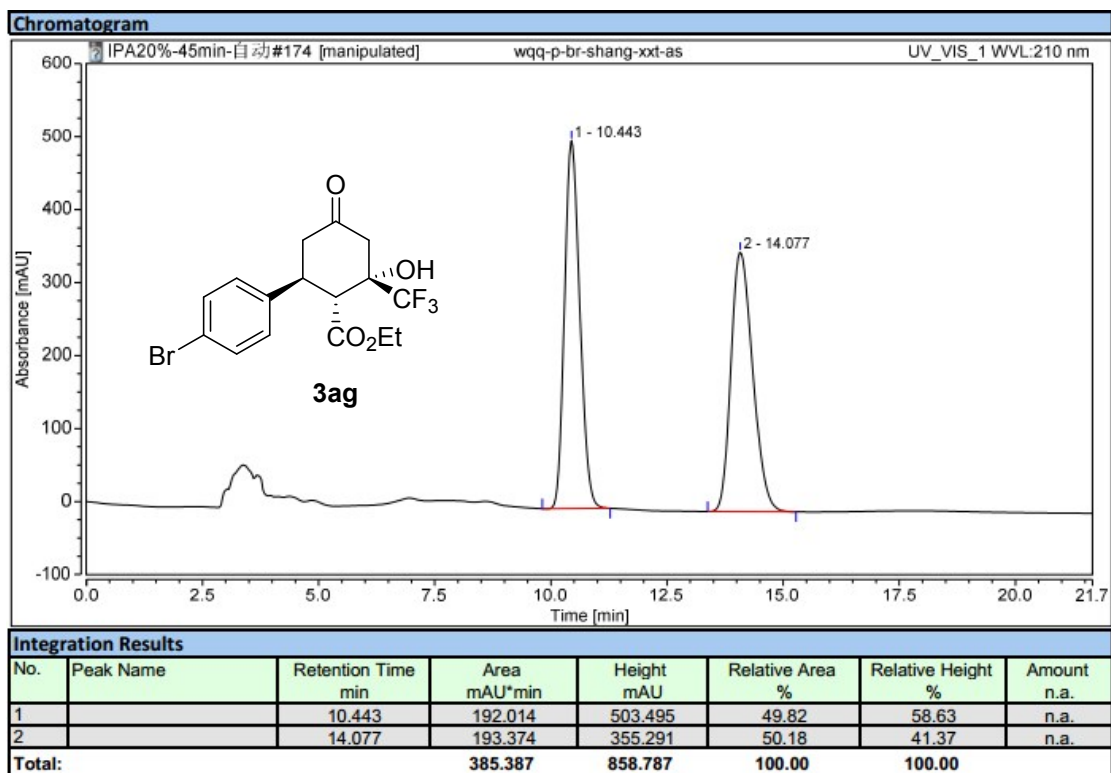

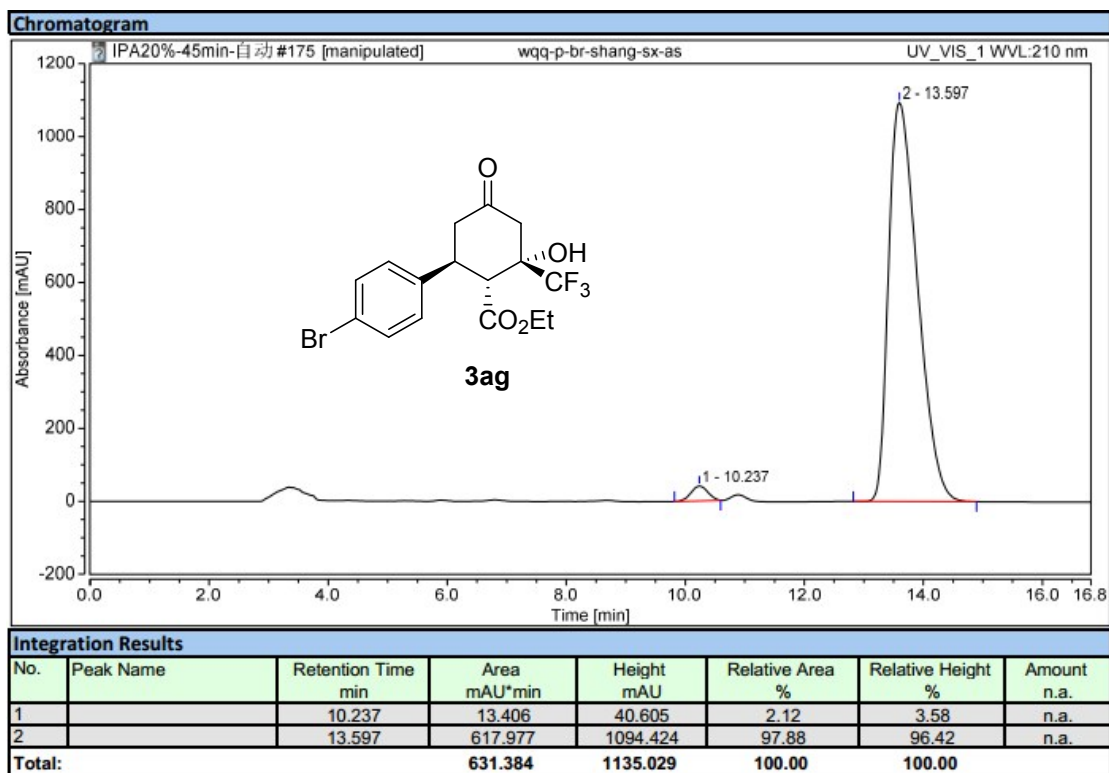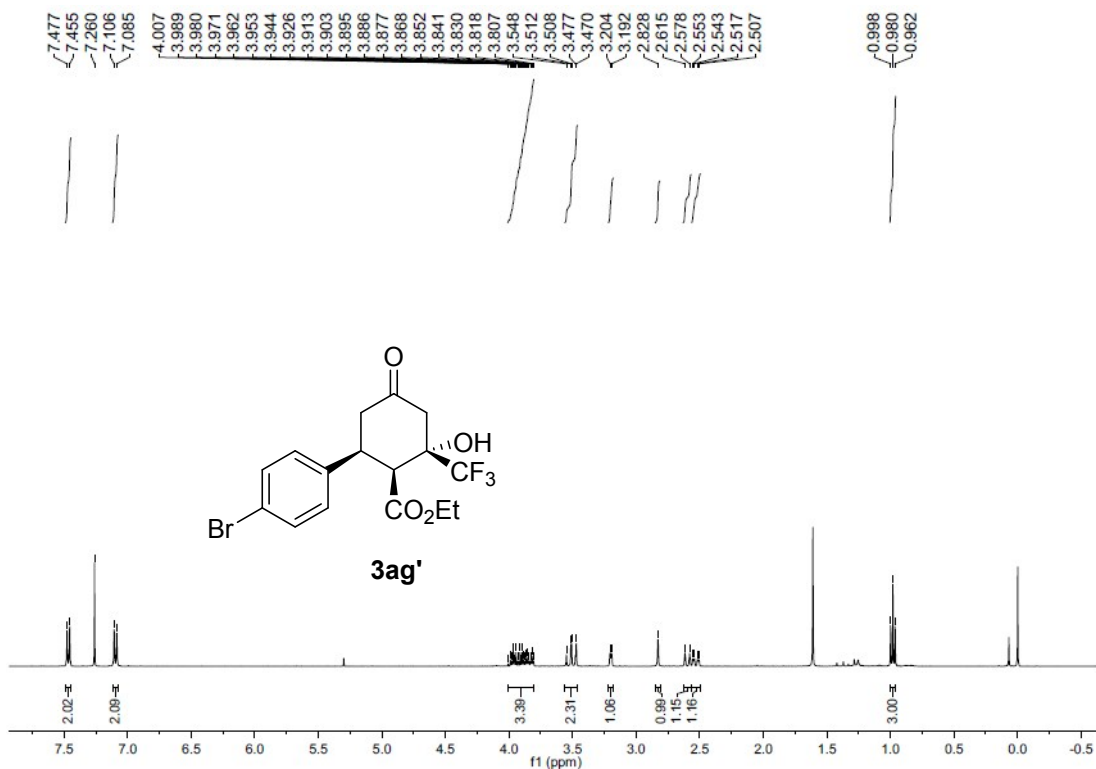



—207.588

—169.717

137.735  
131.798  
129.038  
128.529  
125.692  
122.854  
121.570  
120.014

77.318  
77.000  
76.828  
76.683  
76.527  
76.229  
75.930  
61.192

49.843  
43.189  
40.917  
39.158

—13.612

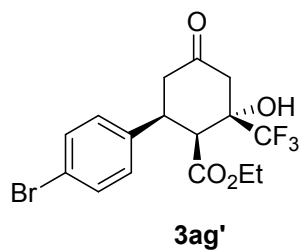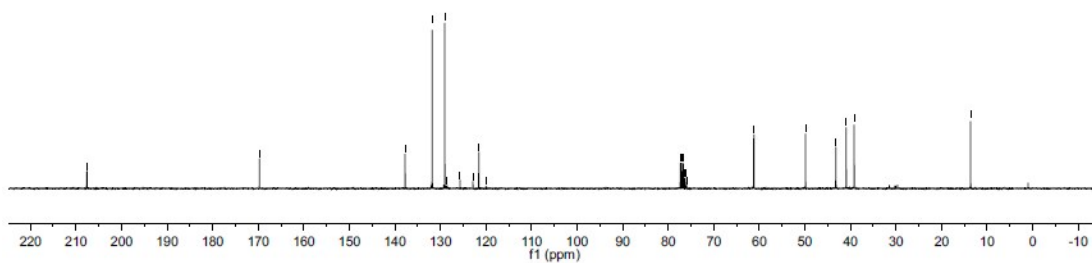

—81.437

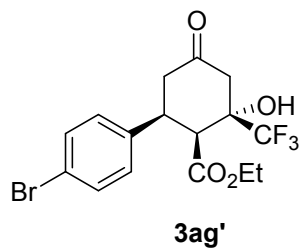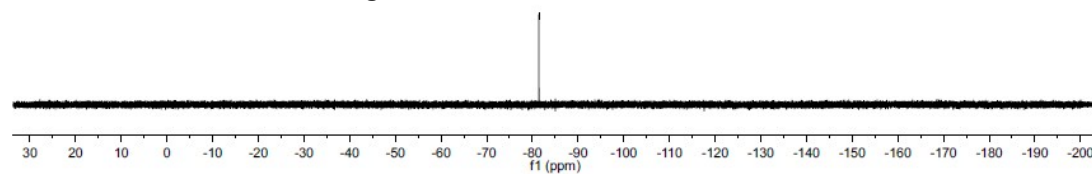

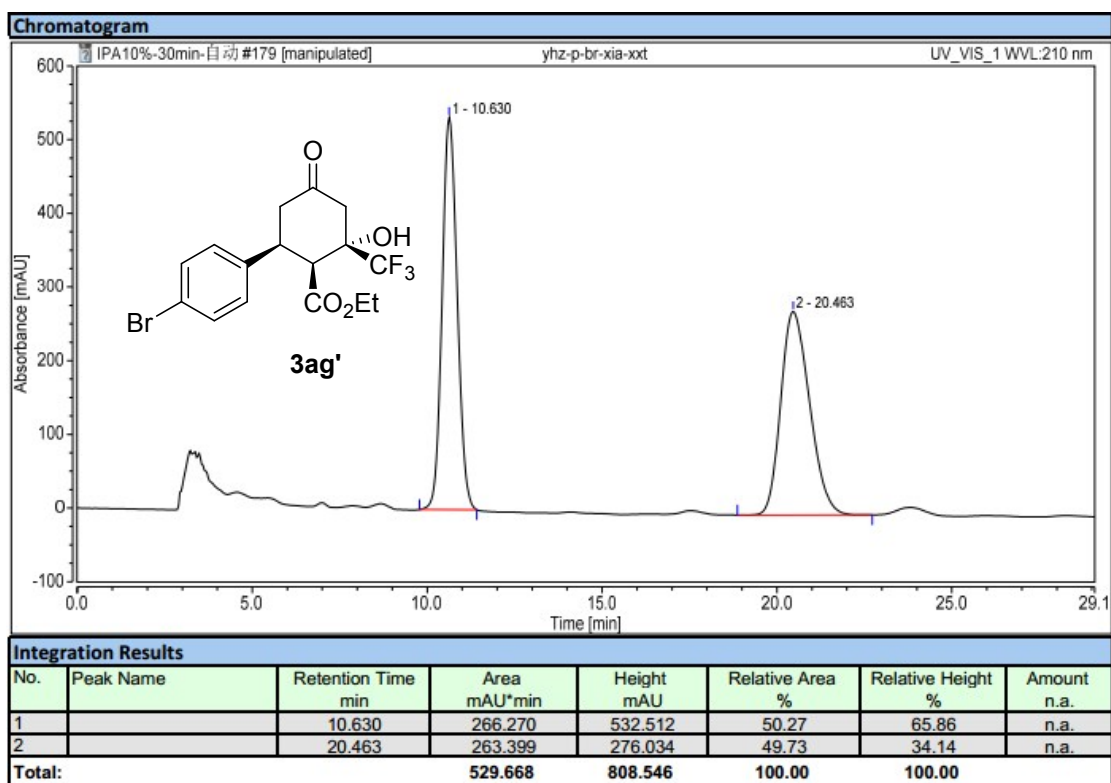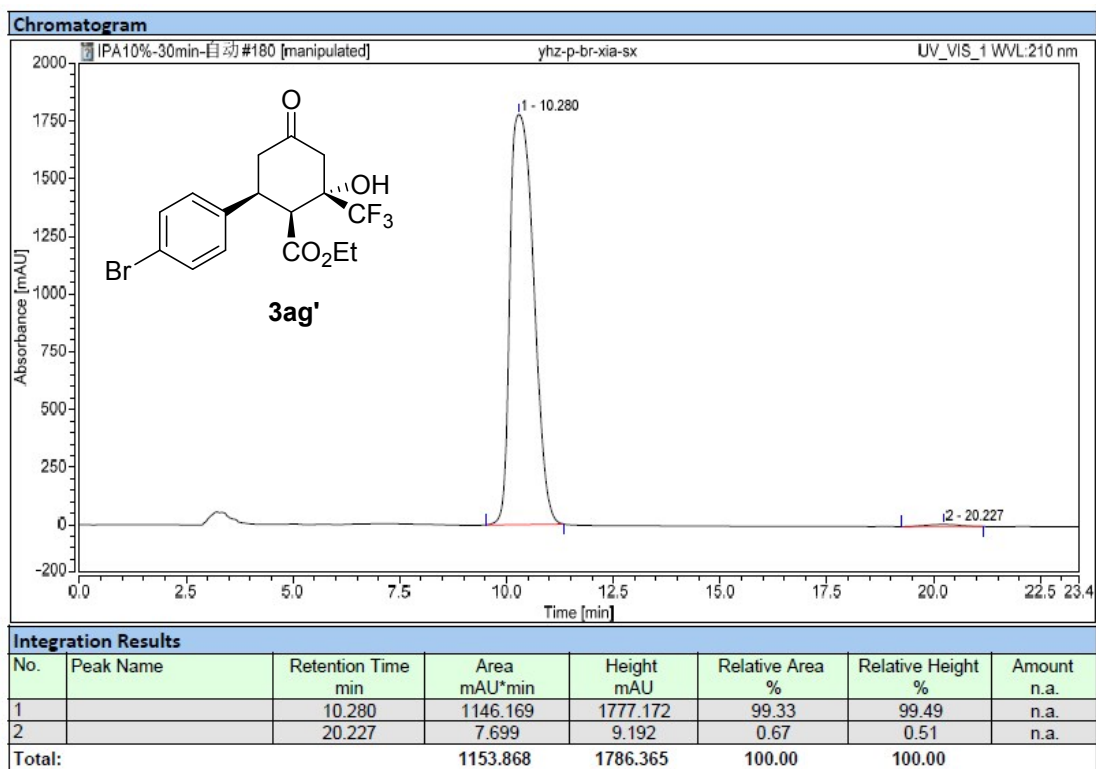

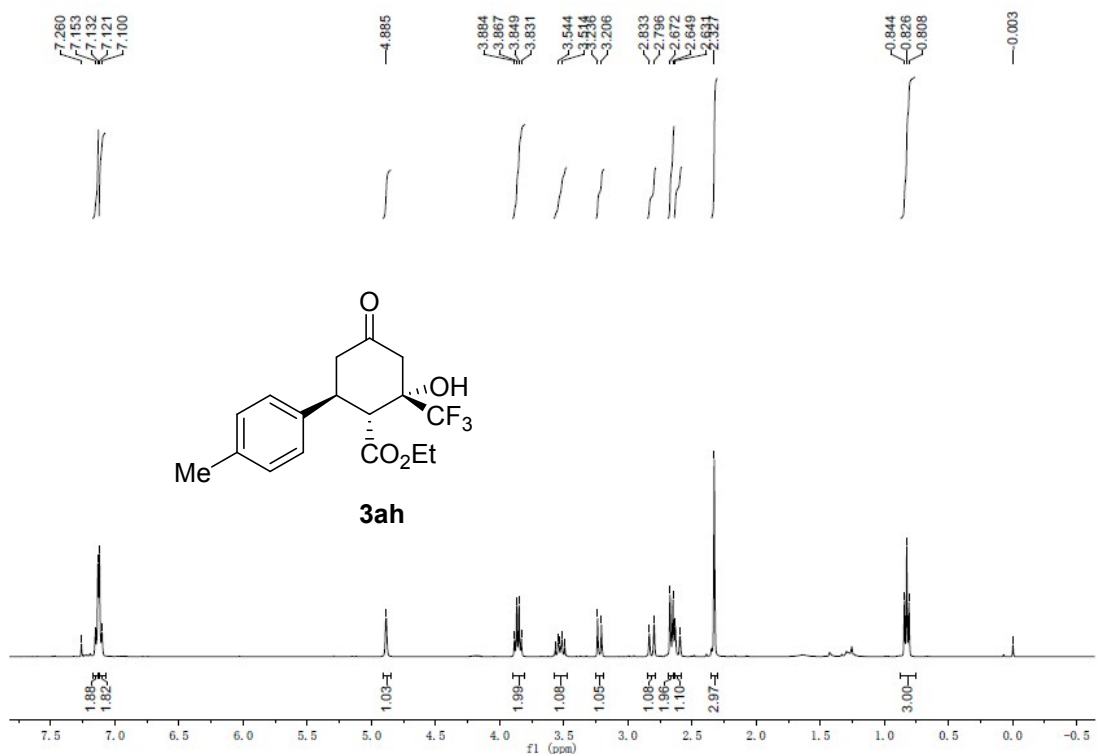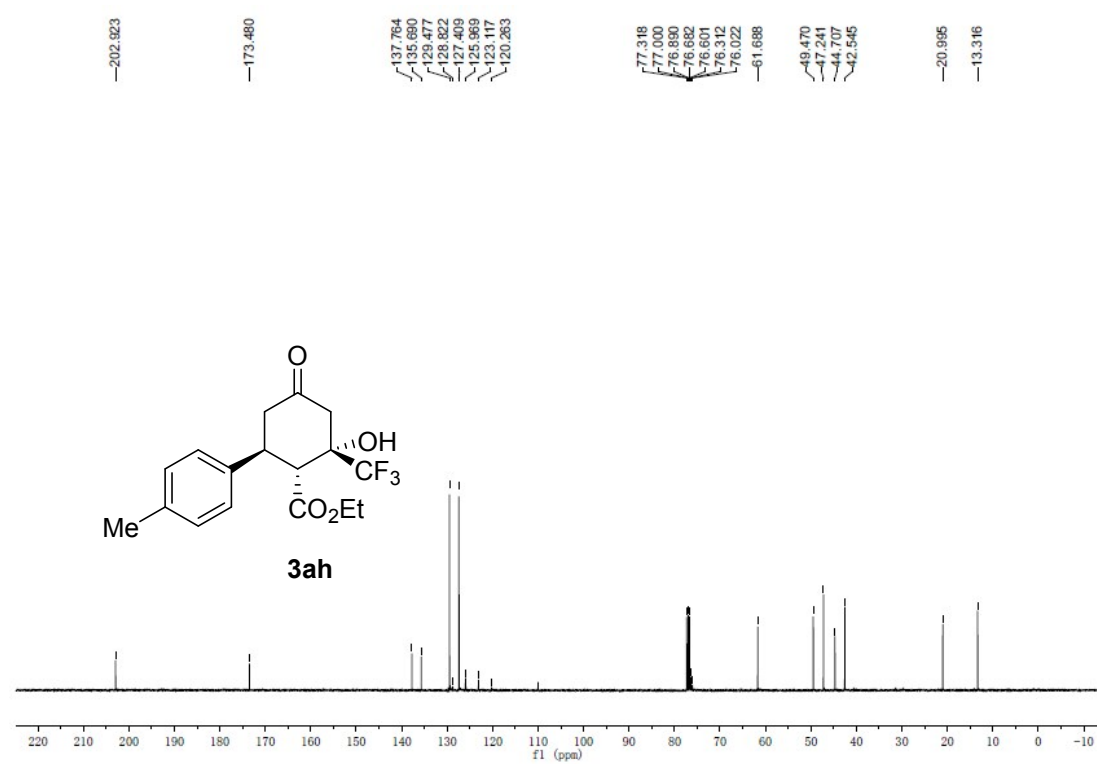

-81.359

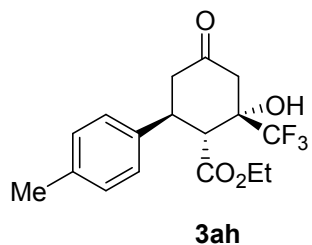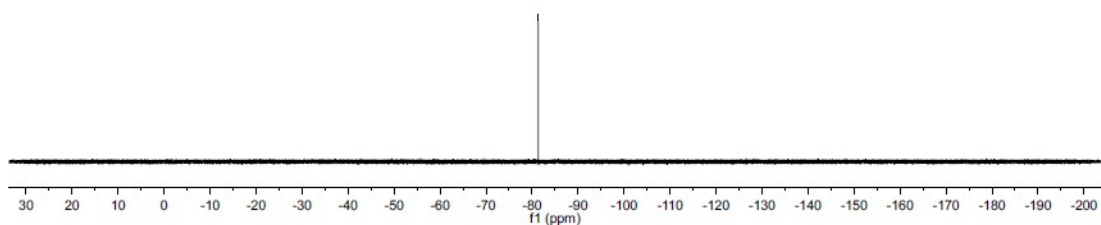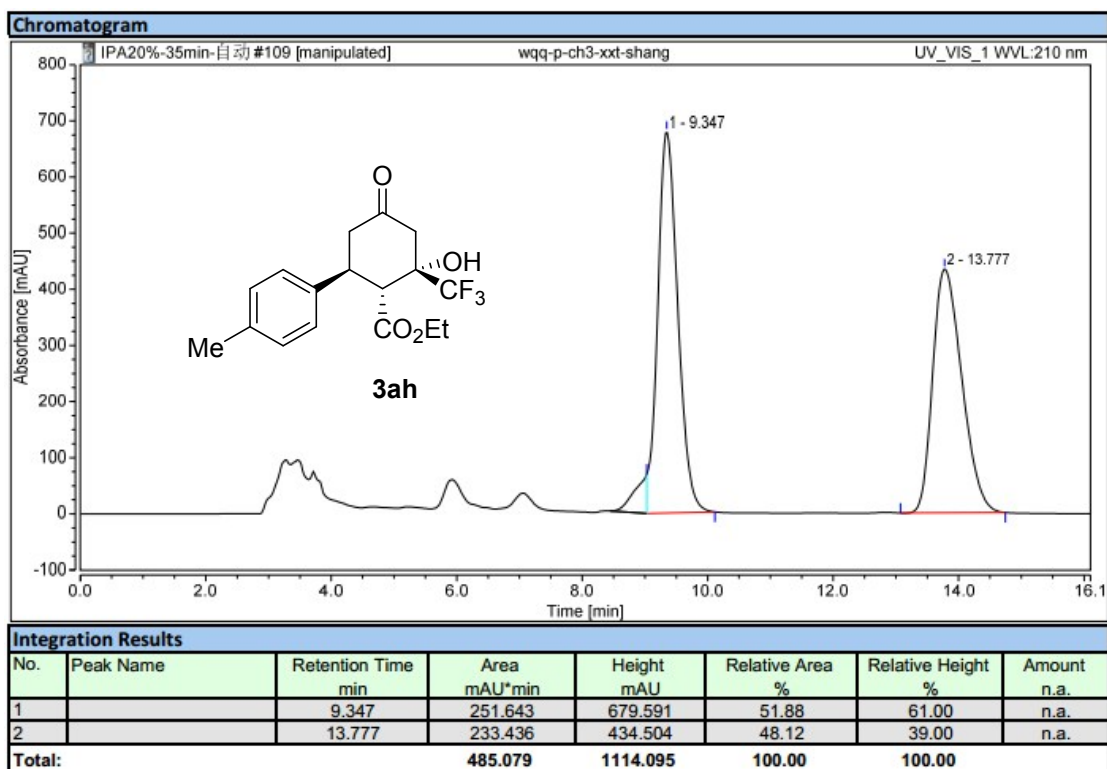

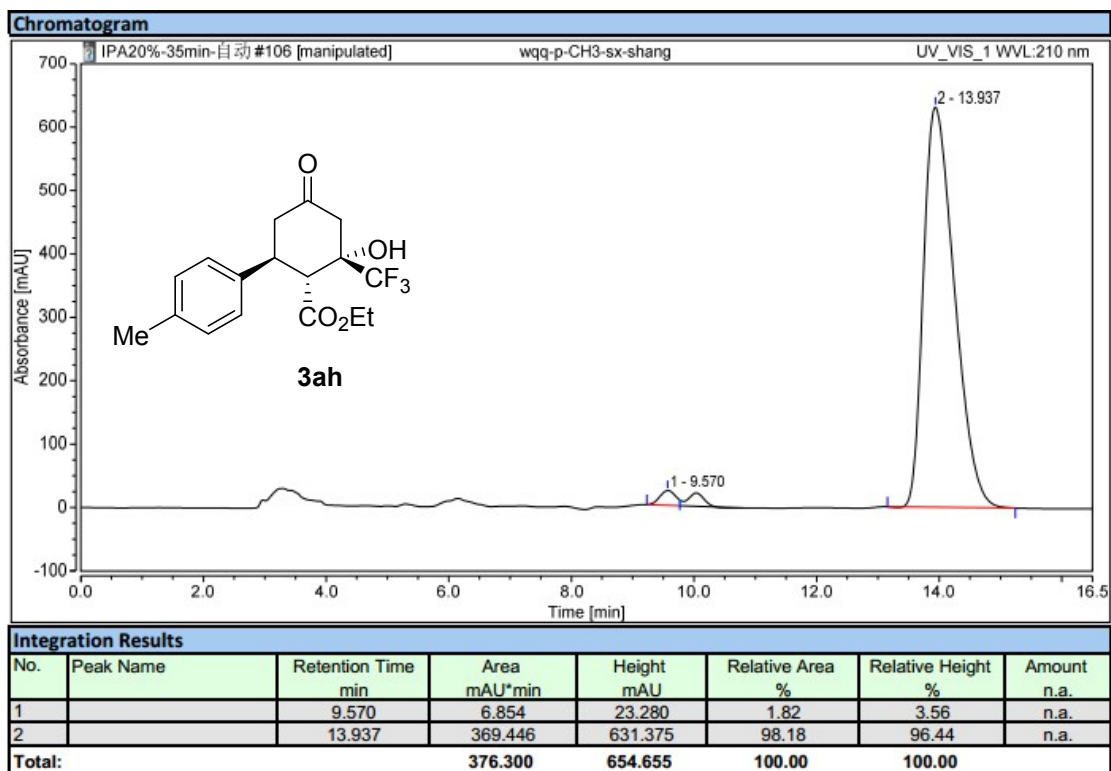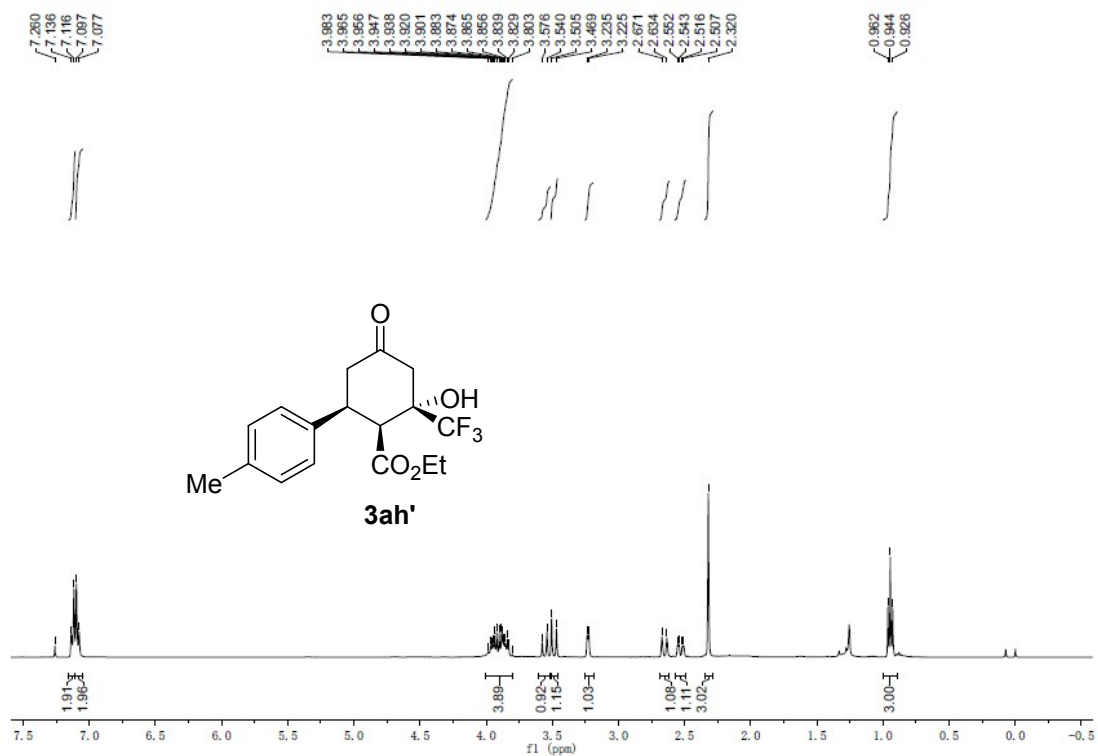

—207.827

—169.919

137.279  
135.663  
129.315  
128.641  
127.163  
125.993  
122.964  
120.115

77.318  
77.000  
76.910  
76.682  
76.607  
76.009  
60.944

50.164  
43.289  
41.289  
39.363

—20.959

—13.586

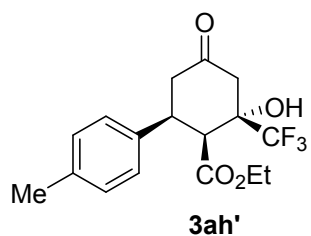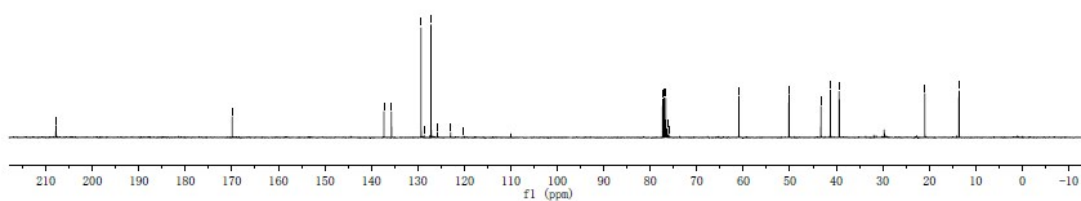

—81.440

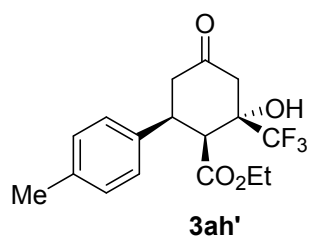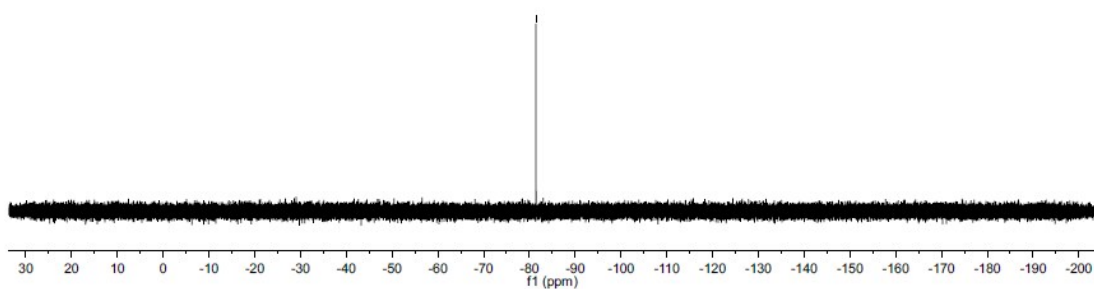

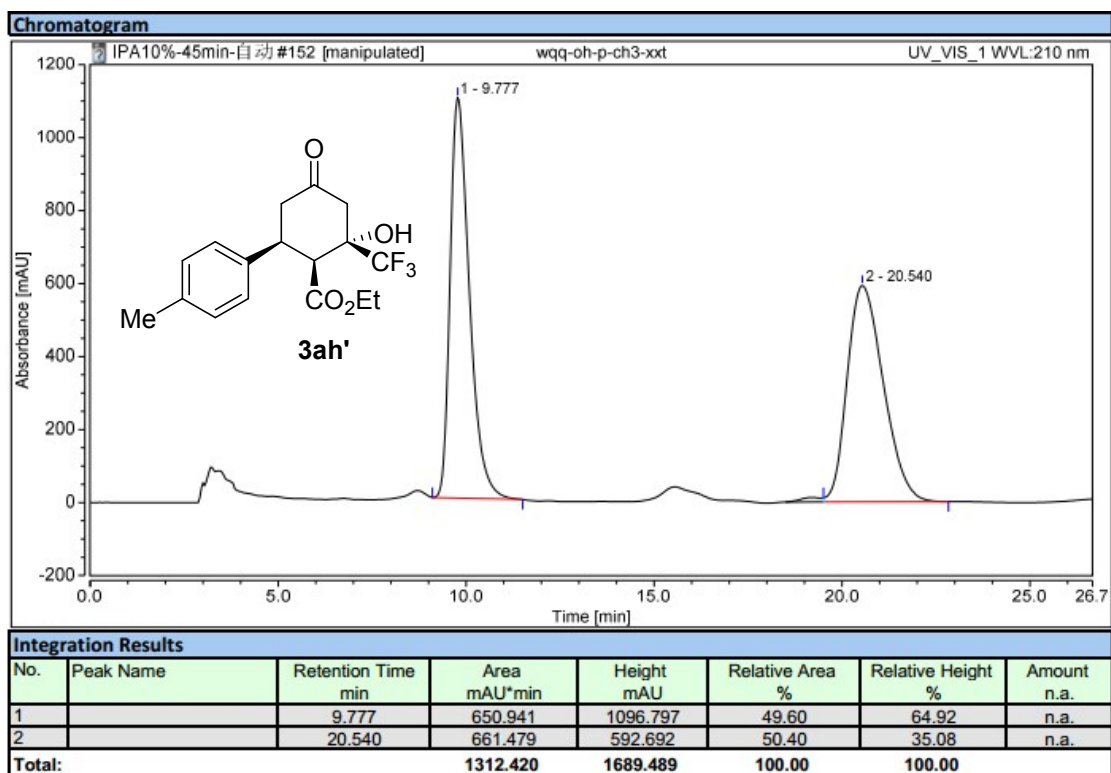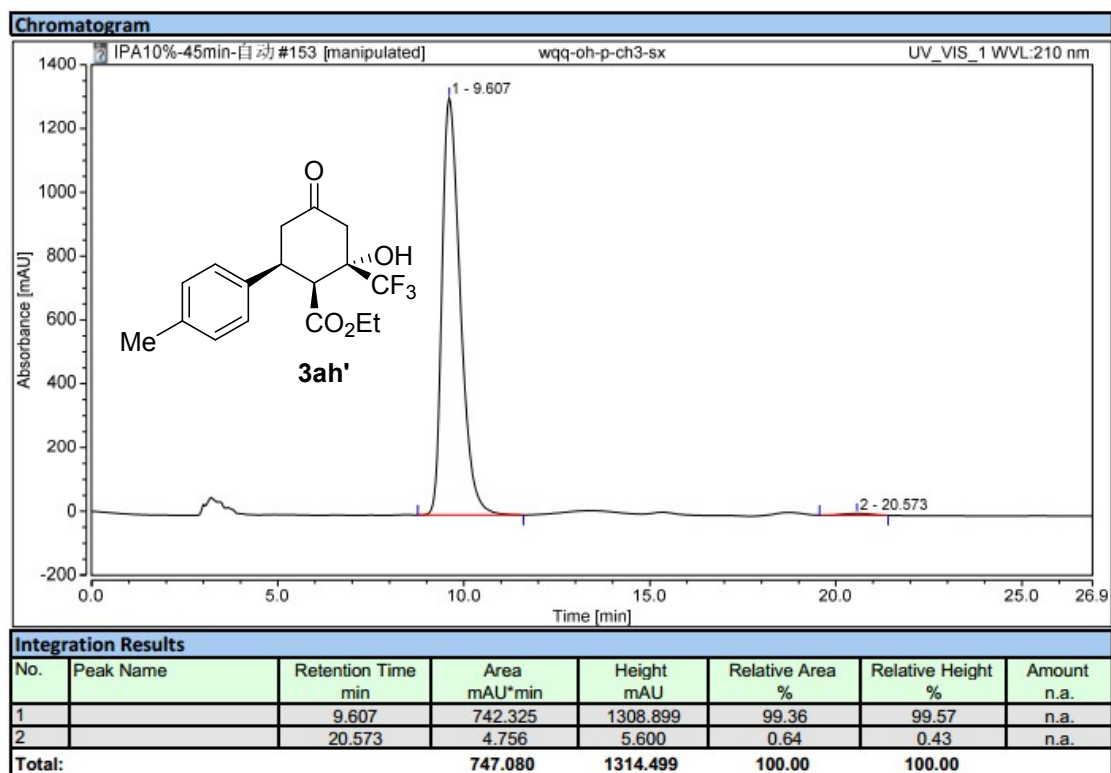

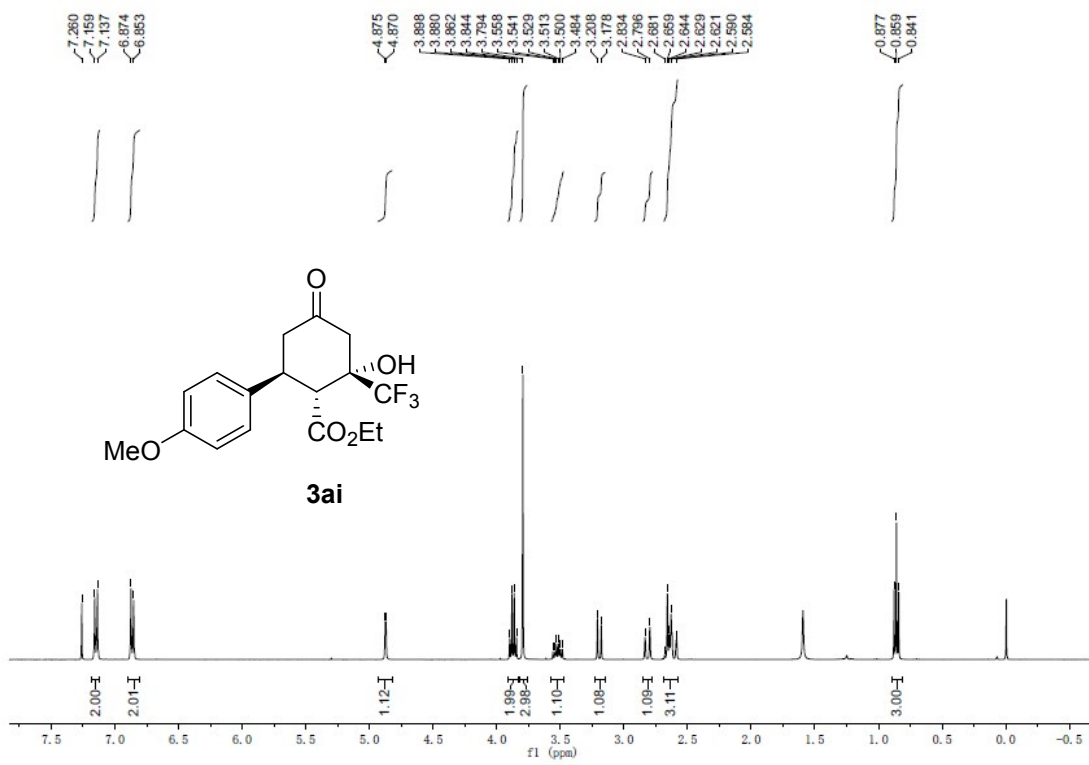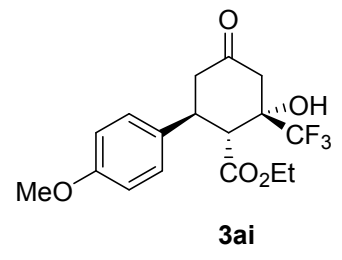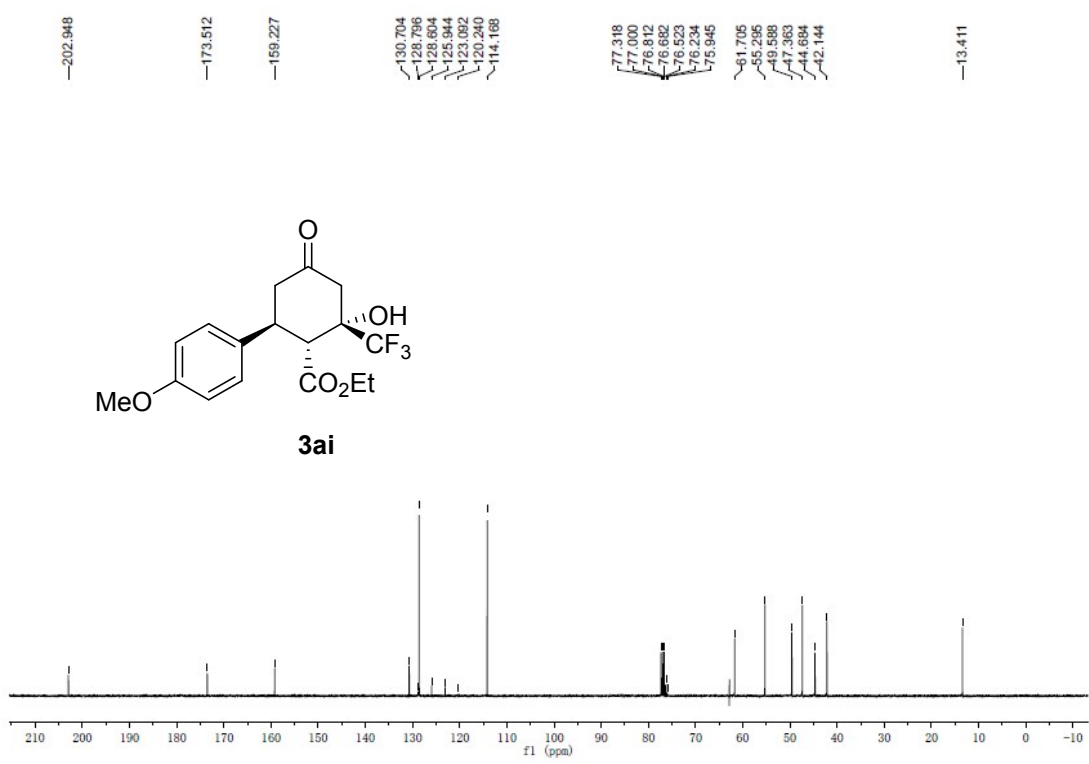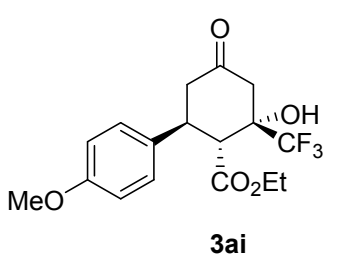



-81.369

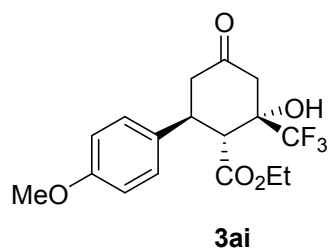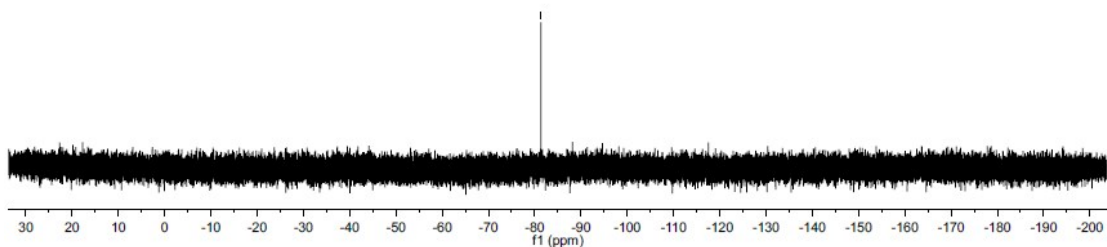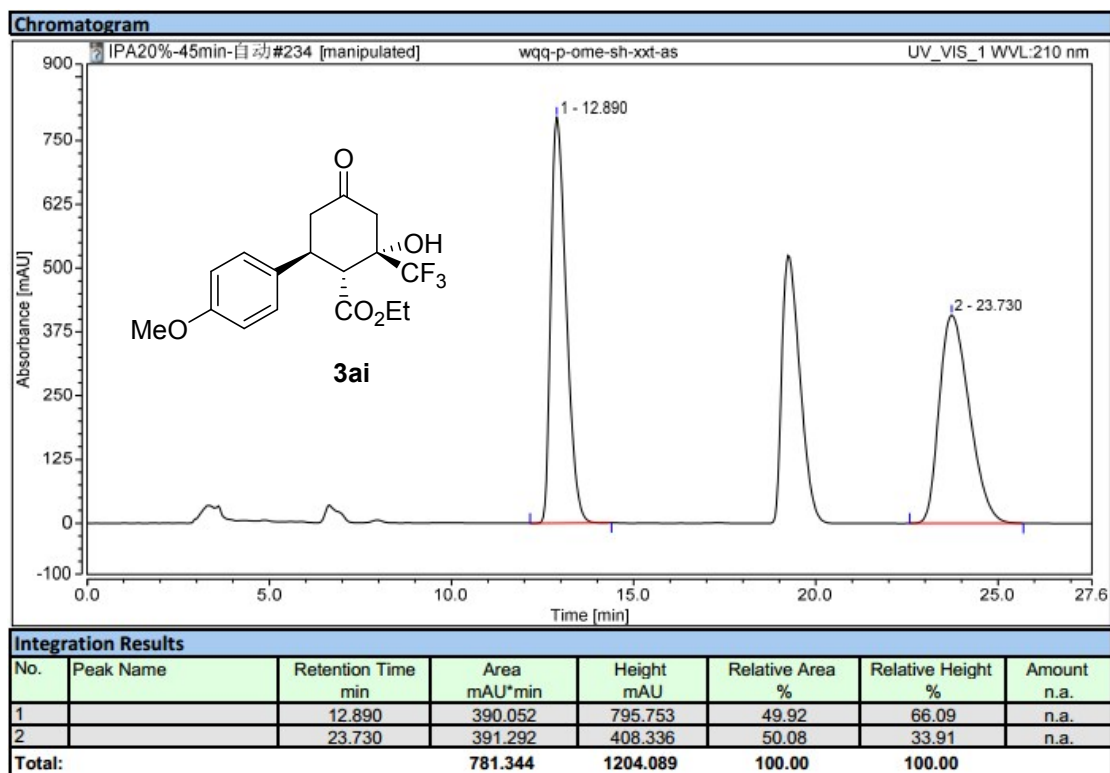

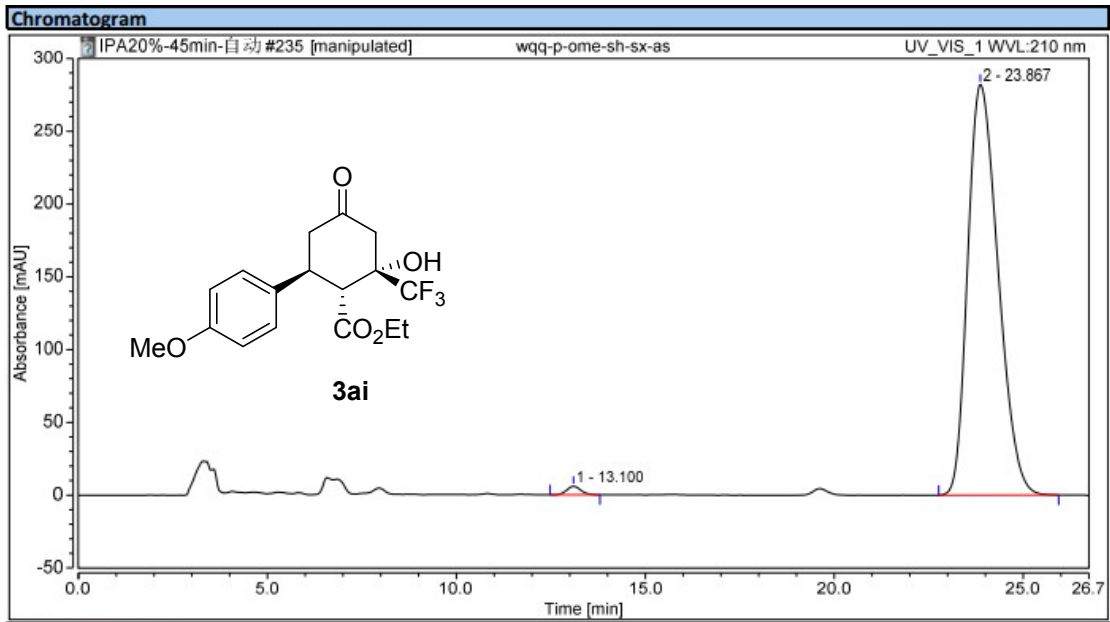

**Integration Results**

| No.           | Peak Name | Retention Time min | Area mAU*min   | Height mAU     | Relative Area % | Relative Height % | Amount n.a. |
|---------------|-----------|--------------------|----------------|----------------|-----------------|-------------------|-------------|
| 1             |           | 13.100             | 2.510          | 5.799          | 0.95            | 2.01              | n.a.        |
| 2             |           | 23.867             | 262.979        | 282.220        | 99.05           | 97.99             | n.a.        |
| <b>Total:</b> |           |                    | <b>265.489</b> | <b>288.018</b> | <b>100.00</b>   | <b>100.00</b>     |             |

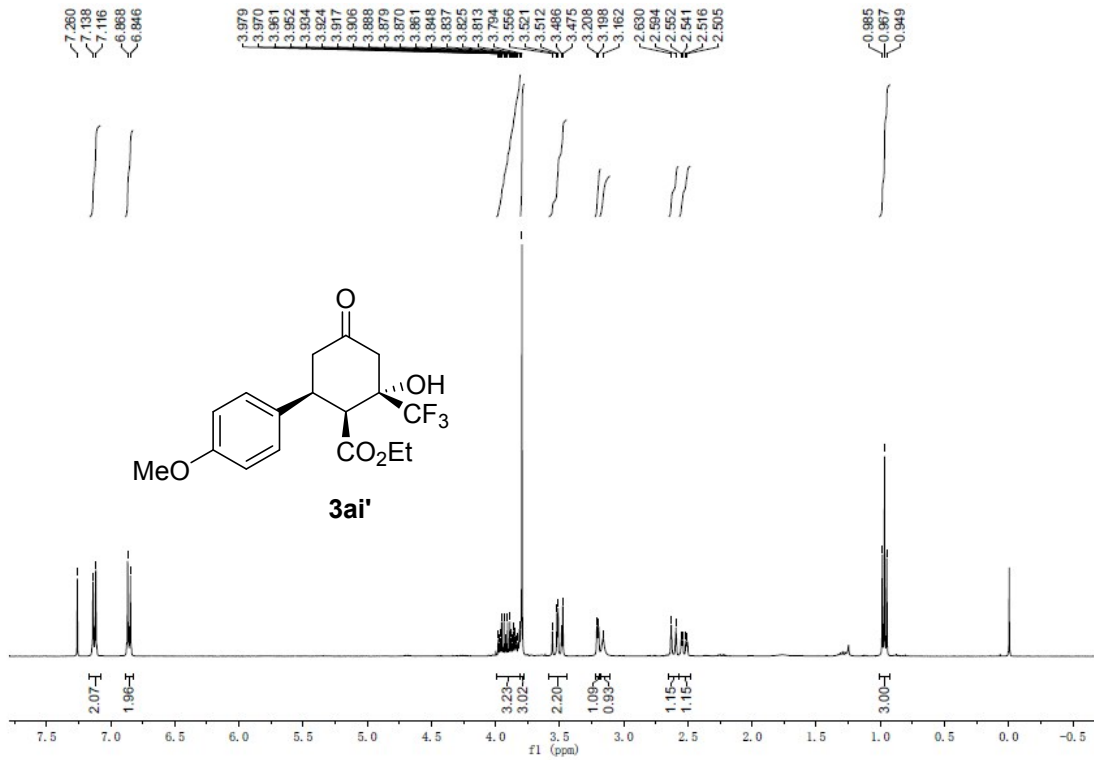

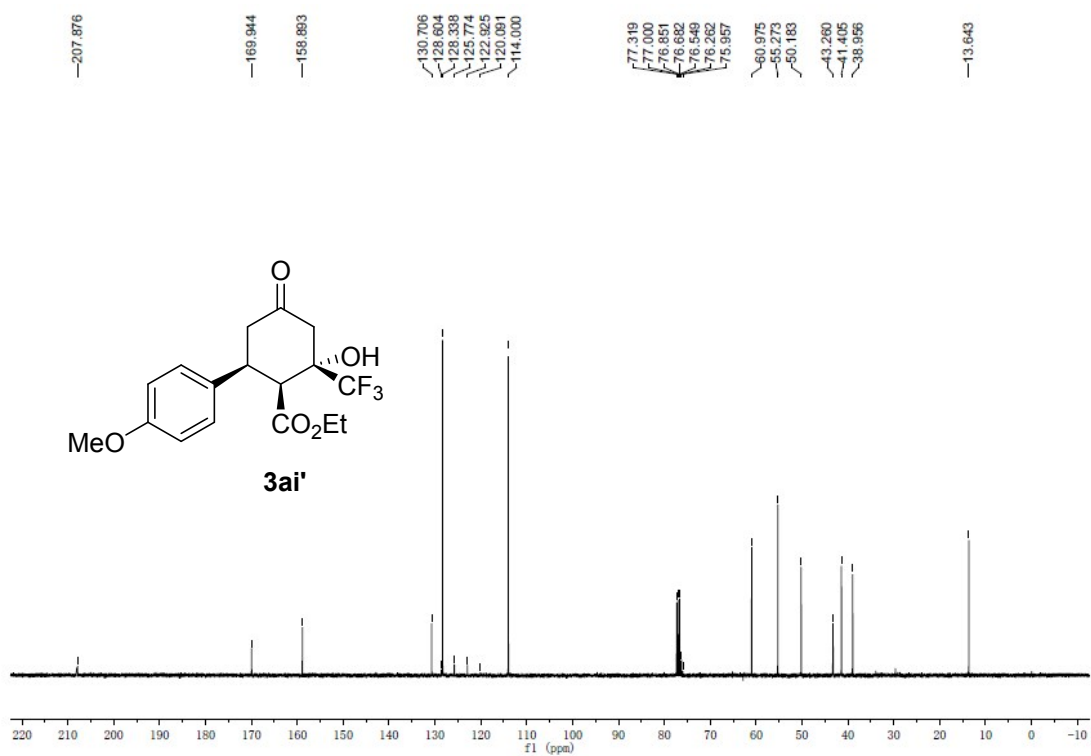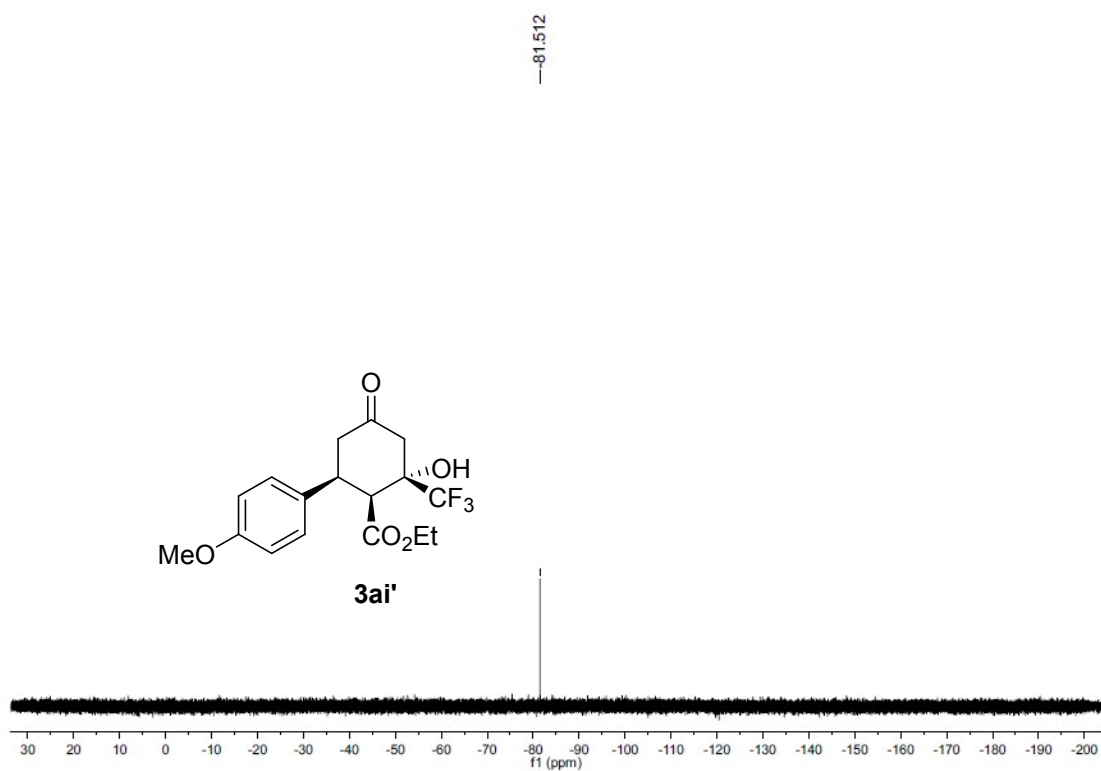

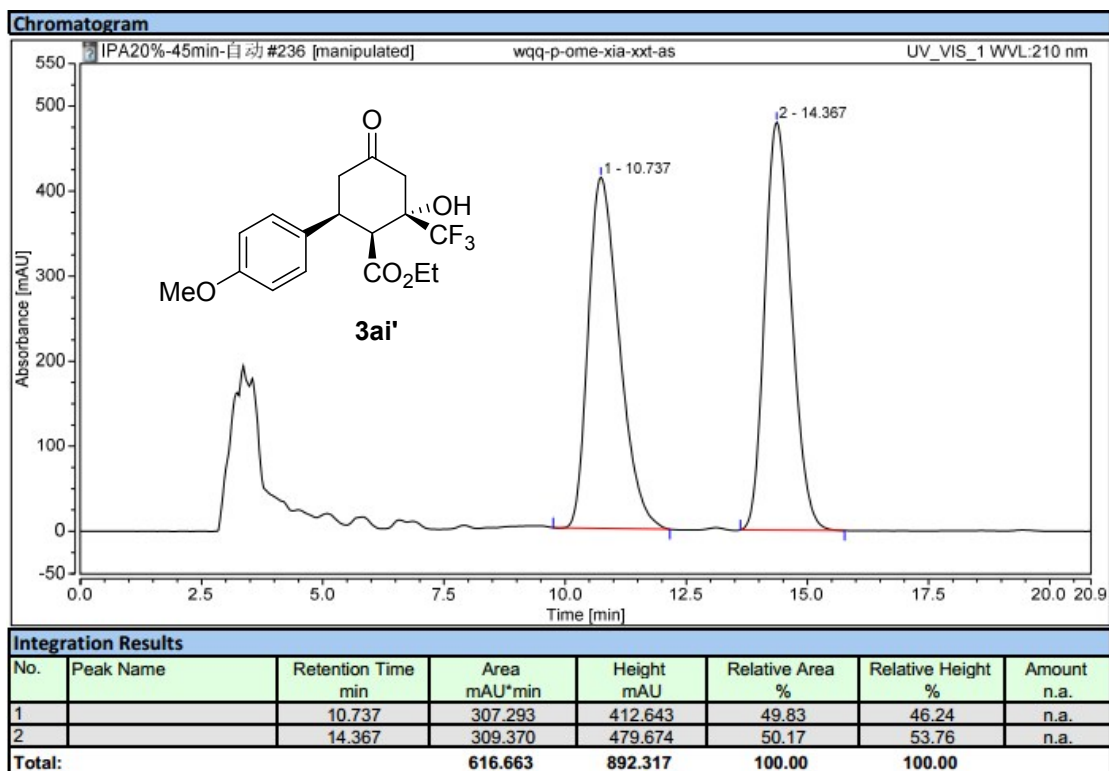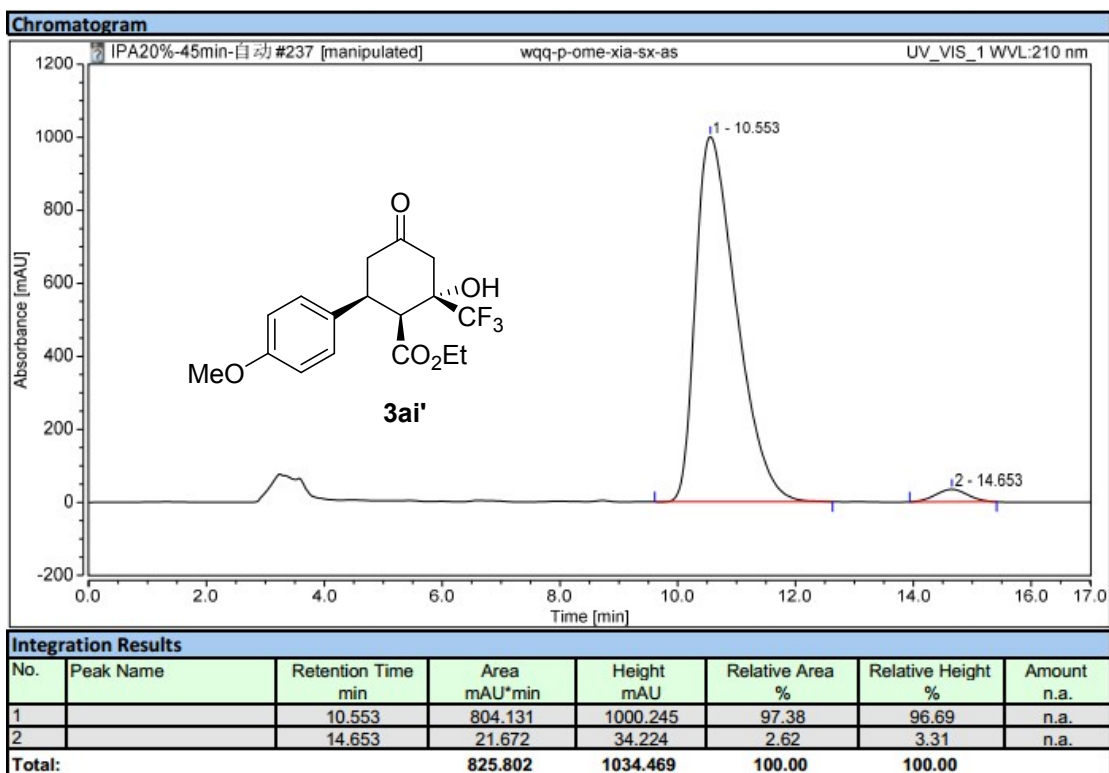

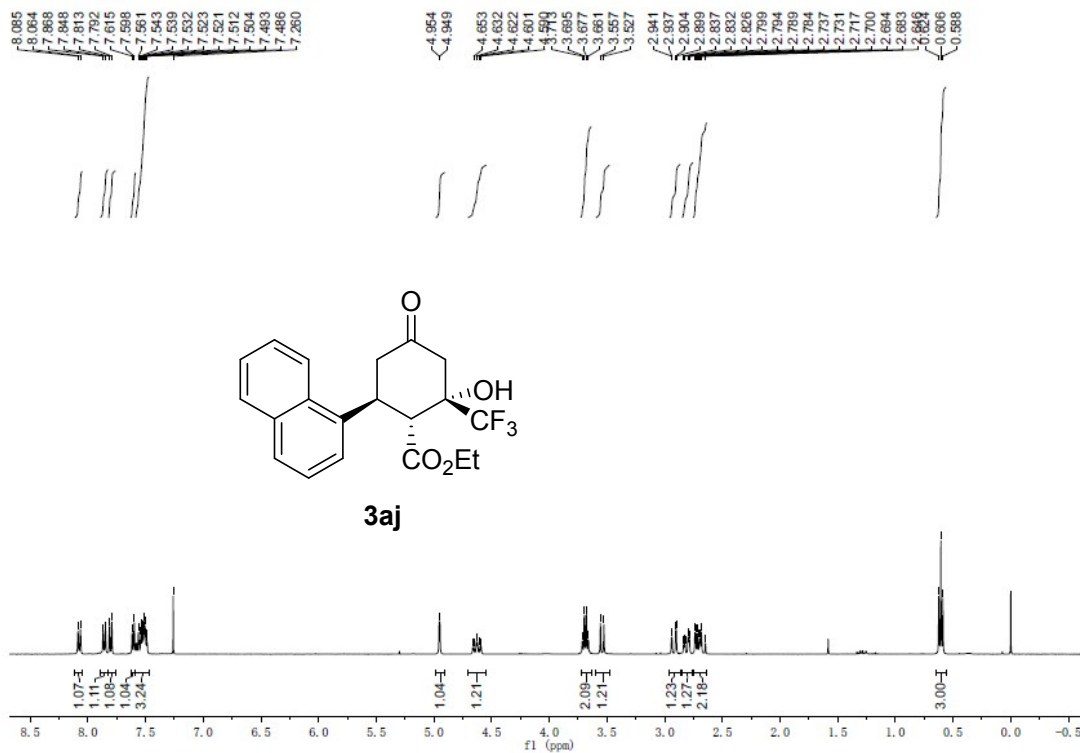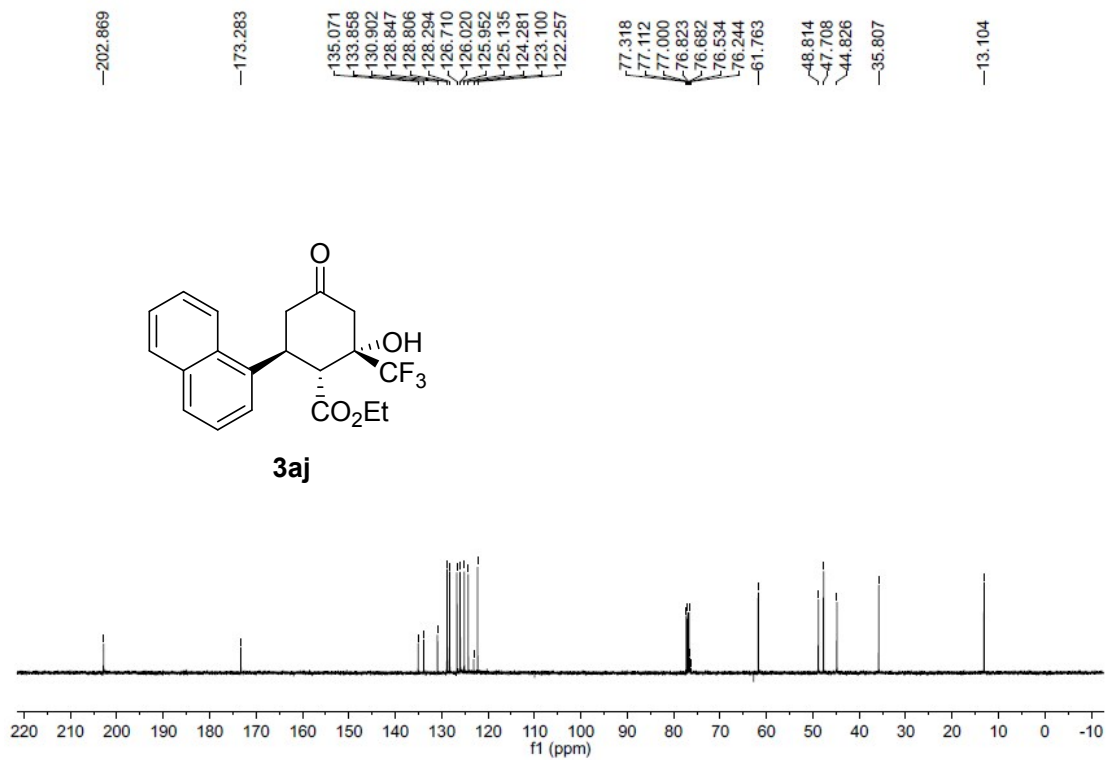

—81.337

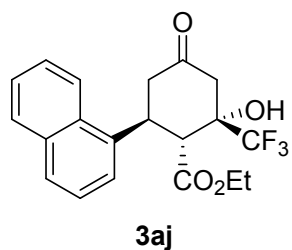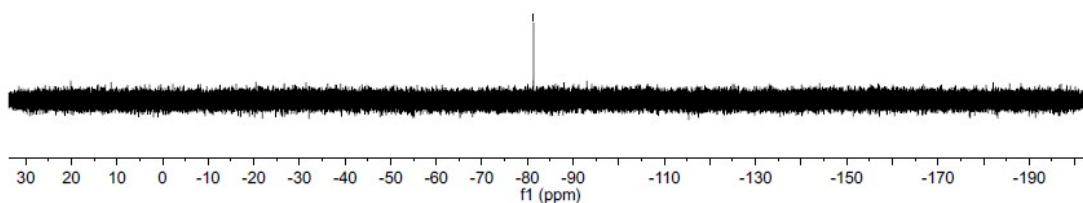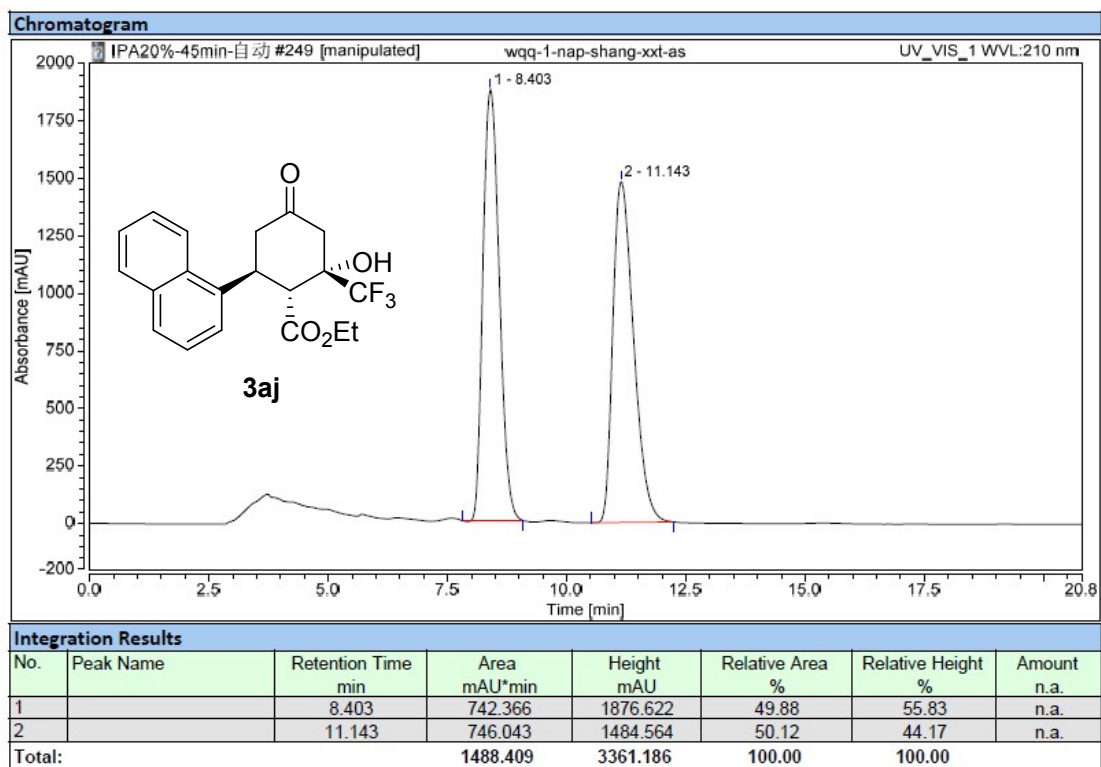

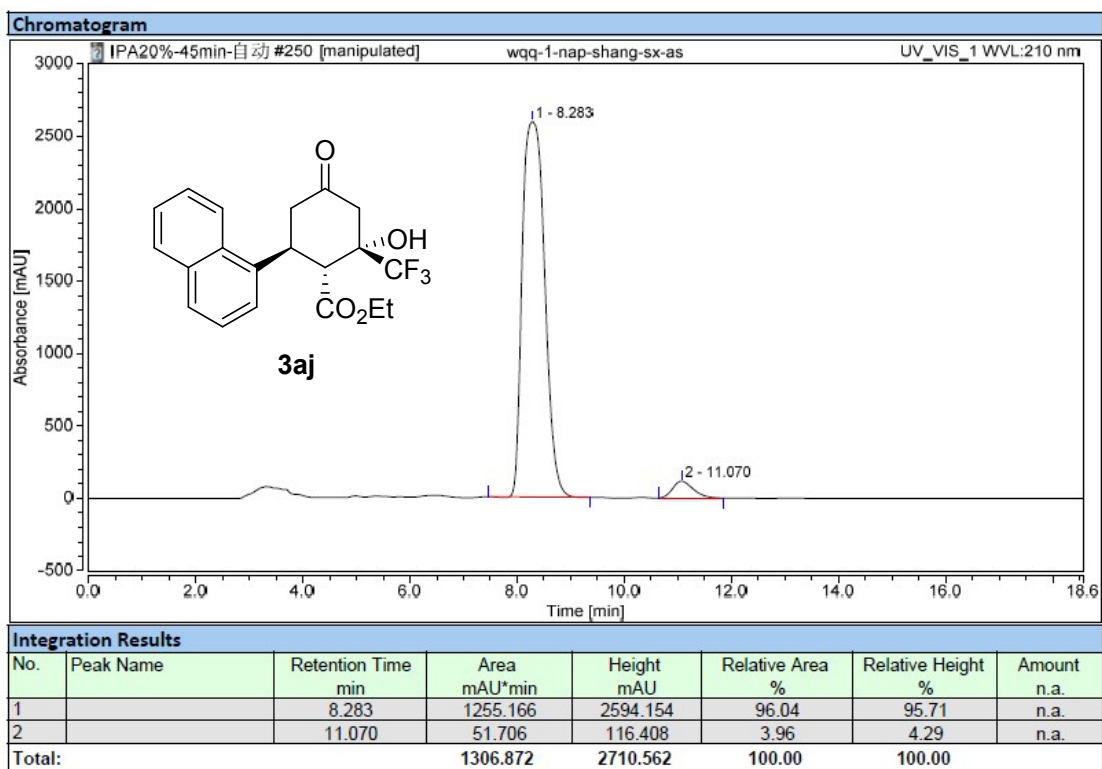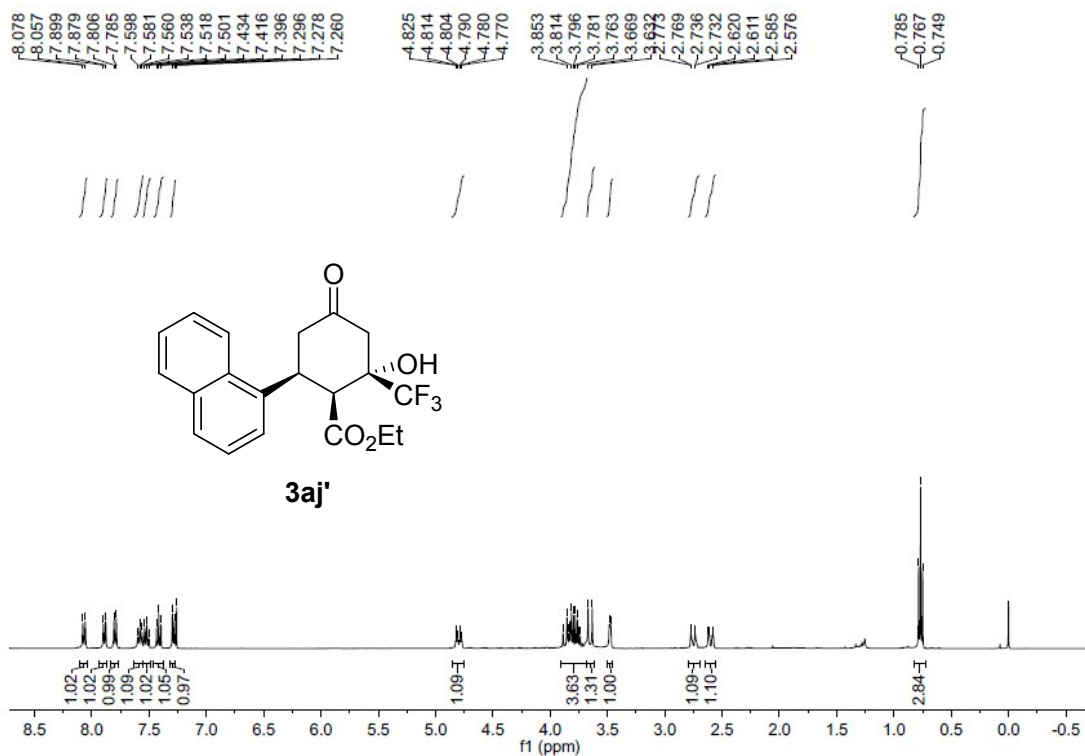

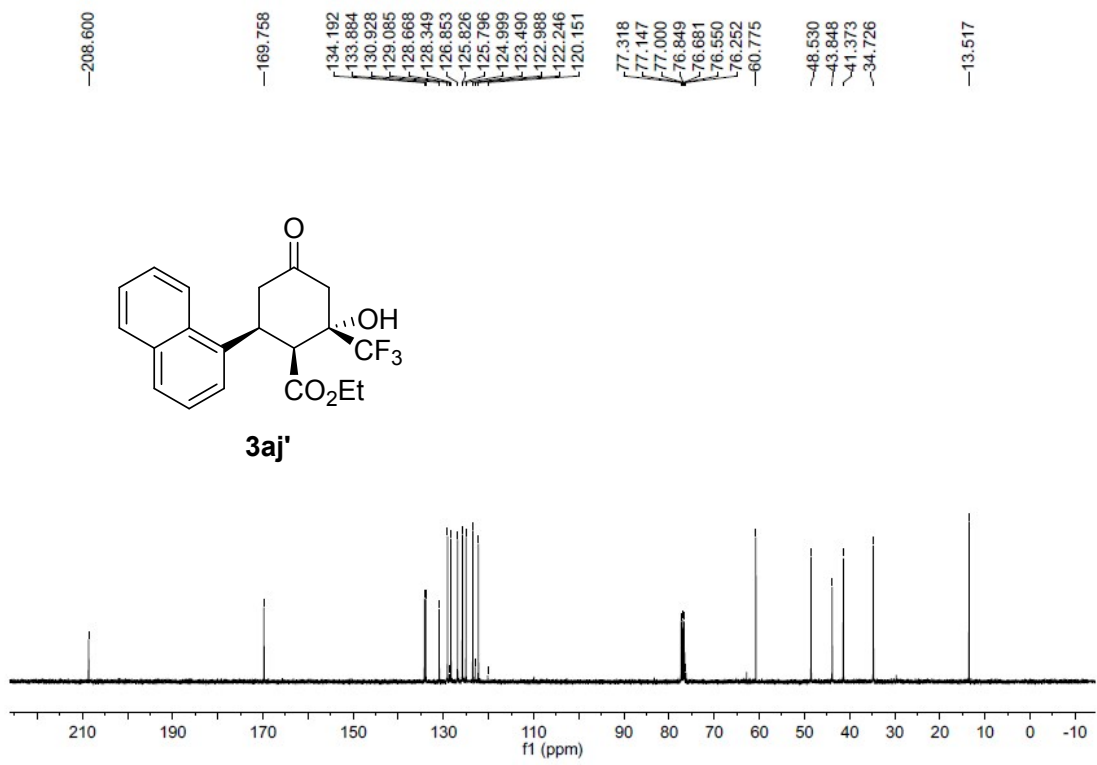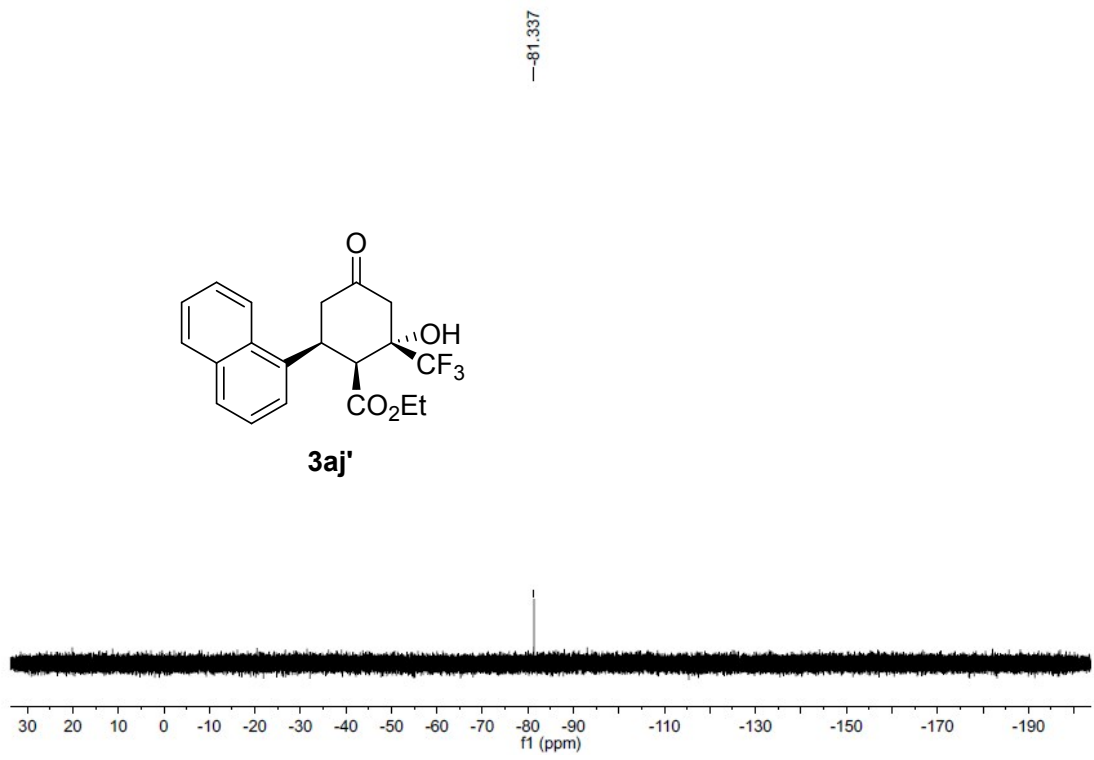



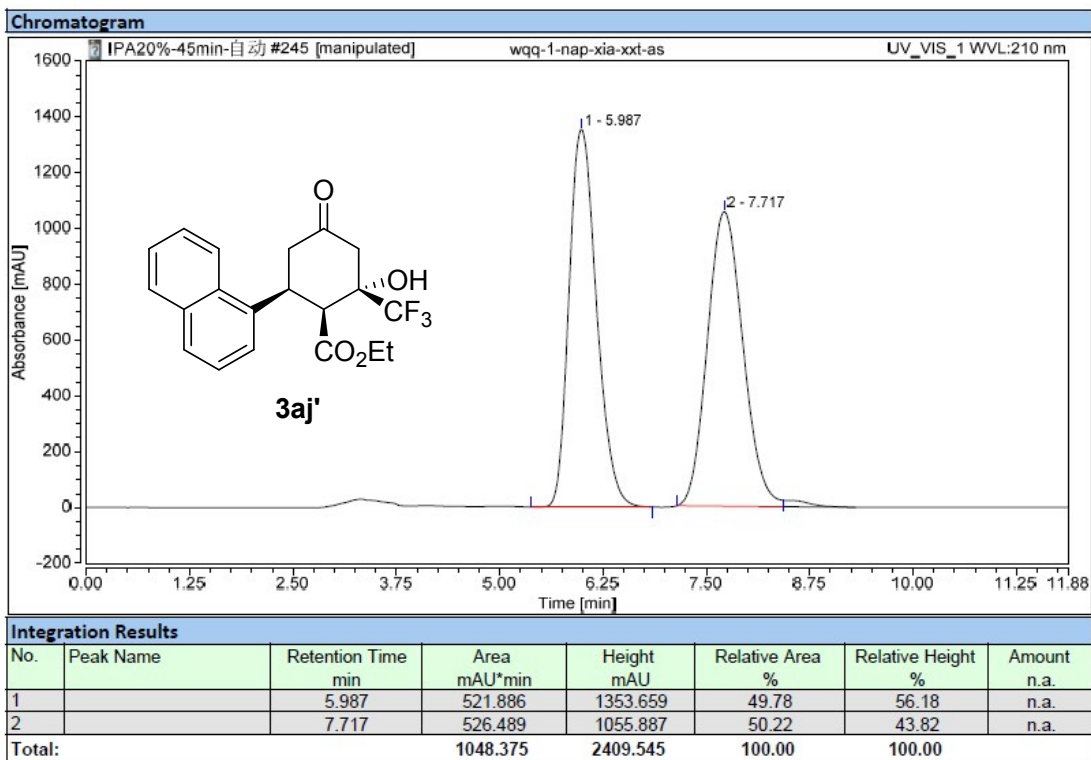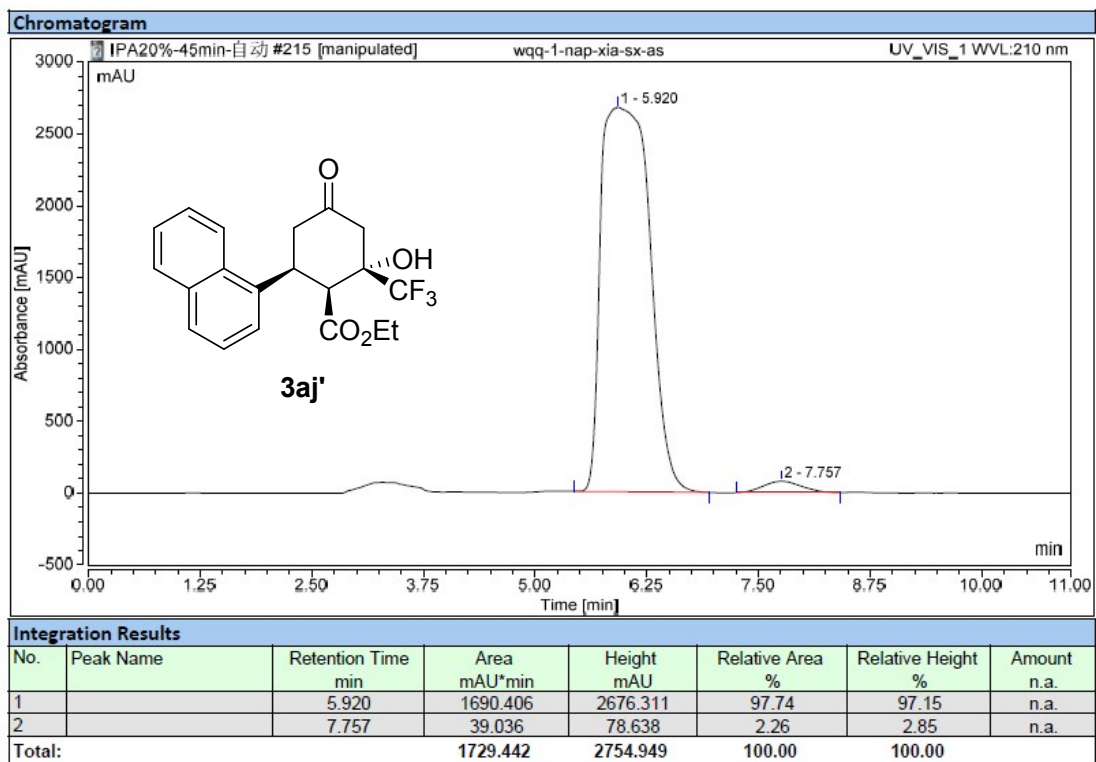

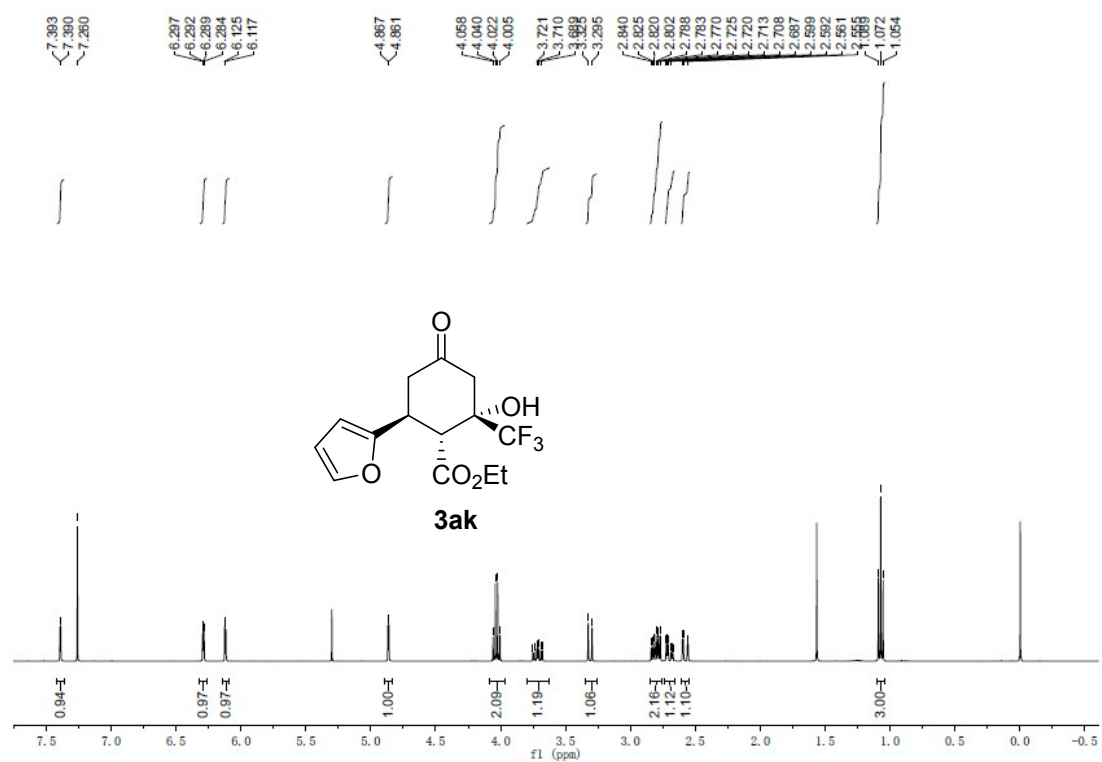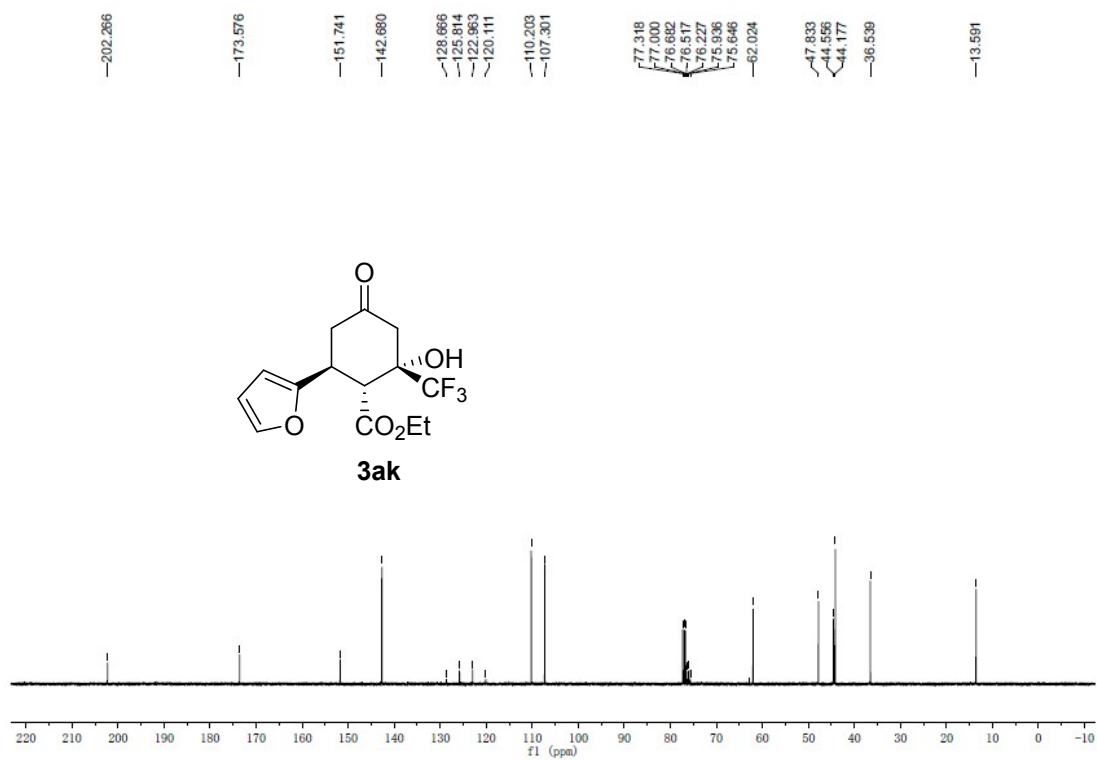

-81.282

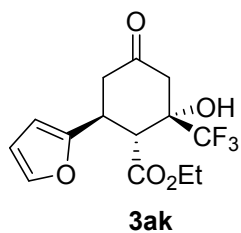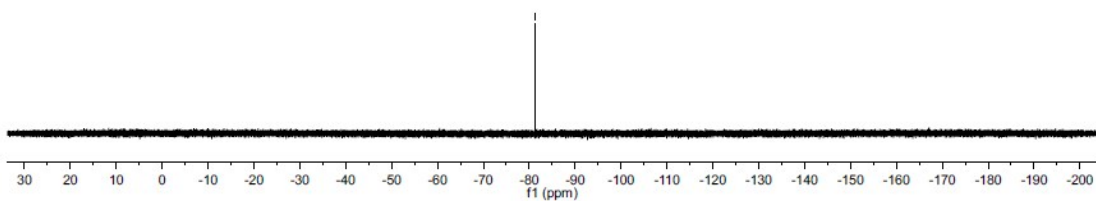

**Chromatogram**

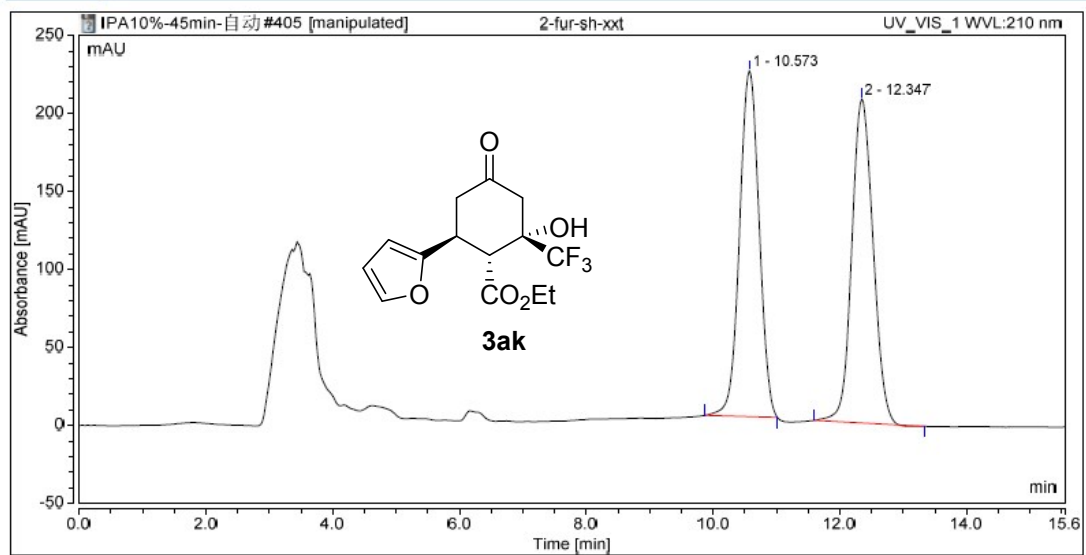

| Integration Results |           |                    |              |            |                 |                   |        |
|---------------------|-----------|--------------------|--------------|------------|-----------------|-------------------|--------|
| No.                 | Peak Name | Retention Time min | Area mAU*min | Height mAU | Relative Area % | Relative Height % | Amount |
| 1                   |           | 10.573             | 79.179       | 221.792    | 49.48           | 51.64             | n.a.   |
| 2                   |           | 12.347             | 80.834       | 207.677    | 50.52           | 48.36             | n.a.   |
| Total:              |           |                    | 160.013      | 429.469    | 100.00          | 100.00            |        |

**Chromatogram**

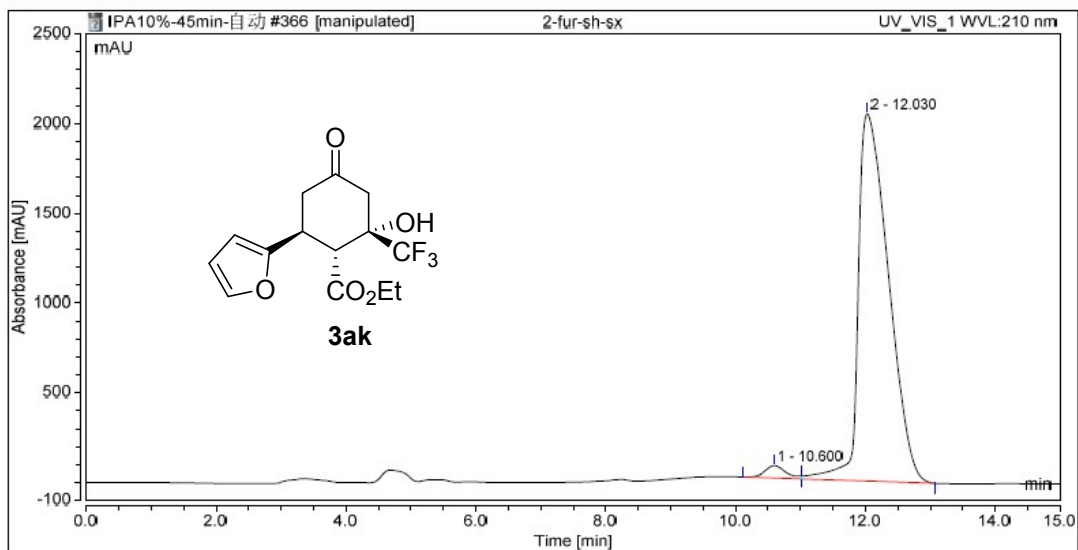

**Integration Results**

| No.           | Peak Name | Retention Time<br>min | Area<br>mAU*min | Height<br>mAU   | Relative Area<br>% | Relative Height<br>% | Amount |
|---------------|-----------|-----------------------|-----------------|-----------------|--------------------|----------------------|--------|
| 1             |           | 10.600                | 25.404          | 68.630          | 2.24               | 3.24                 | n.a.   |
| 2             |           | 12.030                | 1108.243        | 2047.450        | 97.76              | 96.76                | n.a.   |
| <b>Total:</b> |           |                       | <b>1133.648</b> | <b>2116.080</b> | <b>100.00</b>      | <b>100.00</b>        |        |

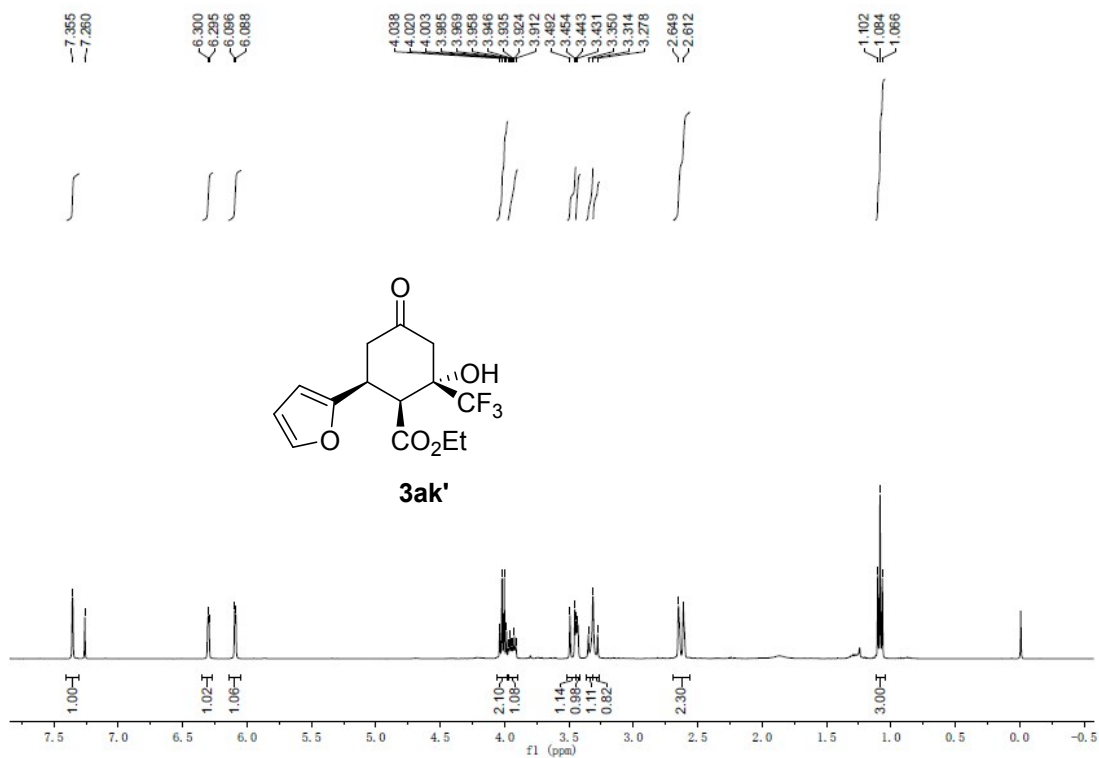

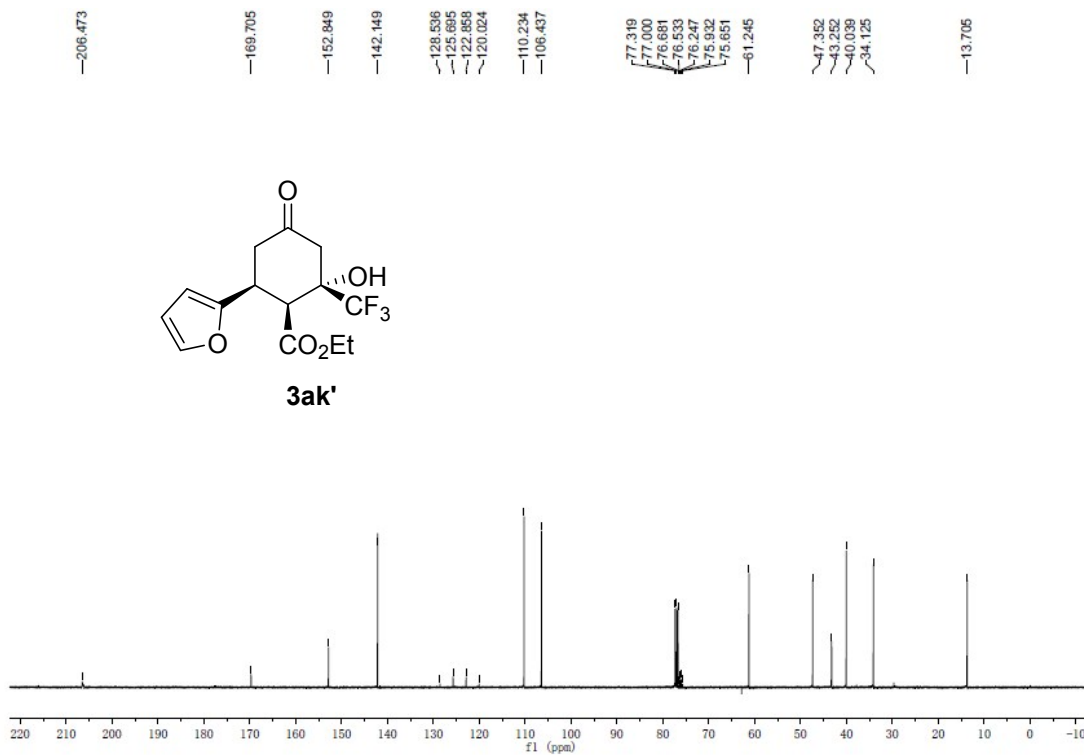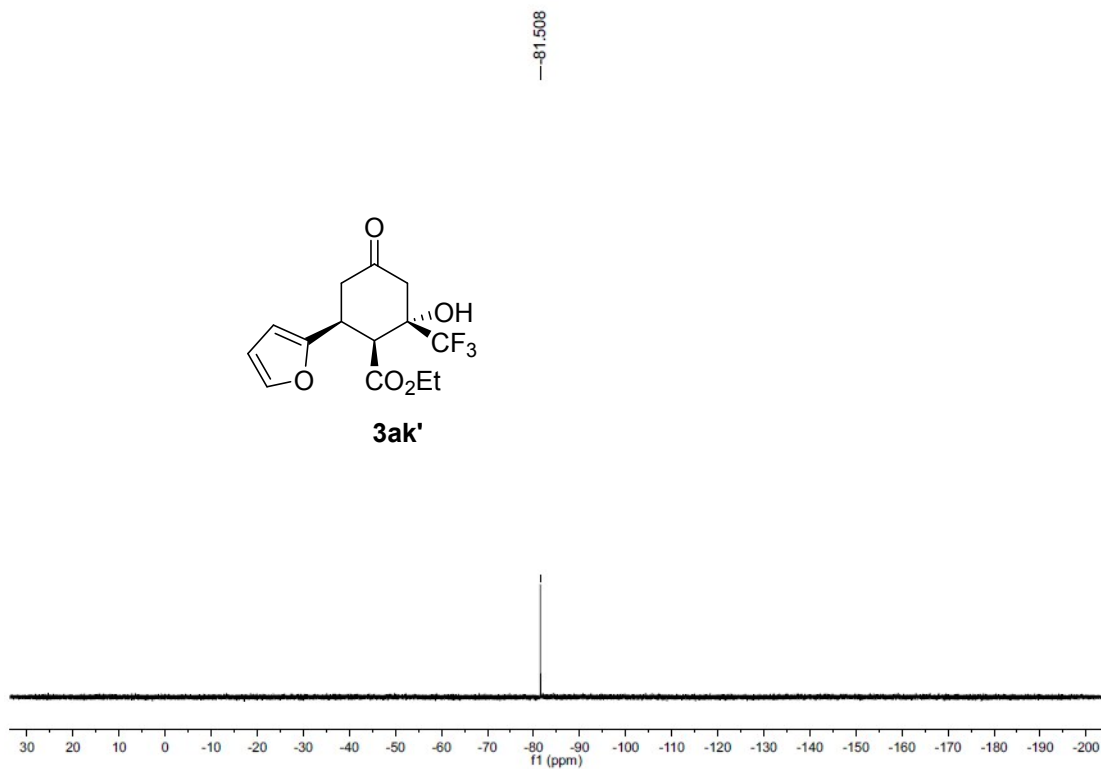

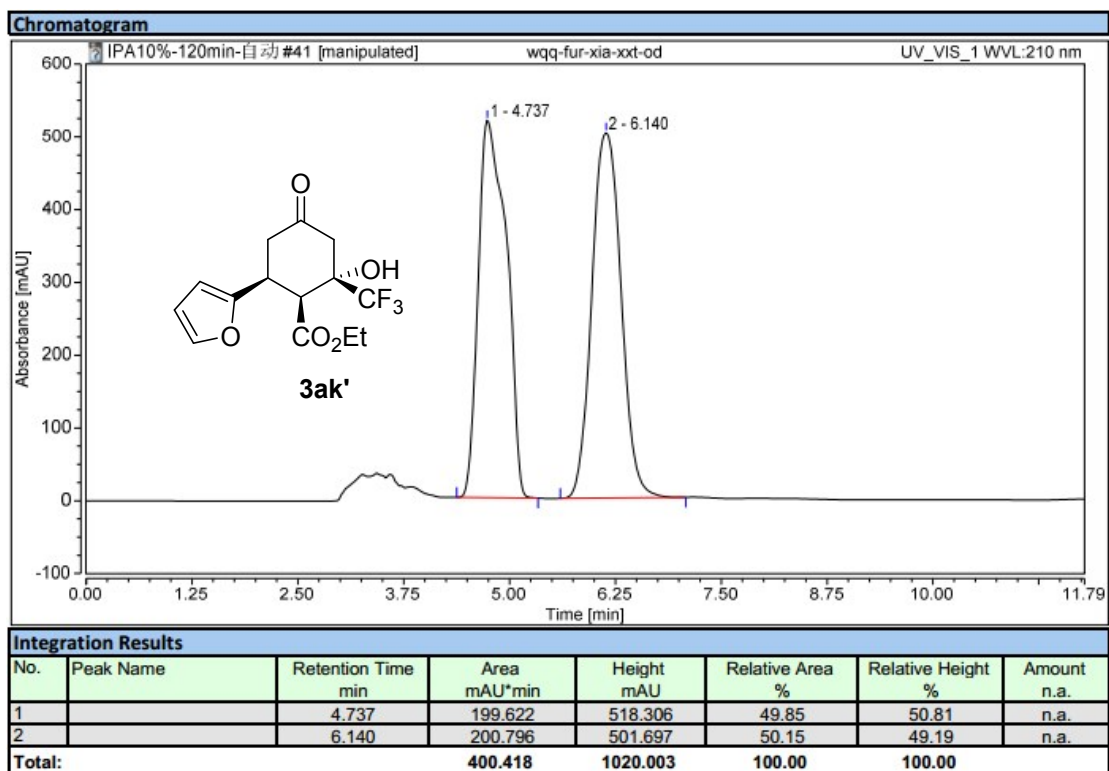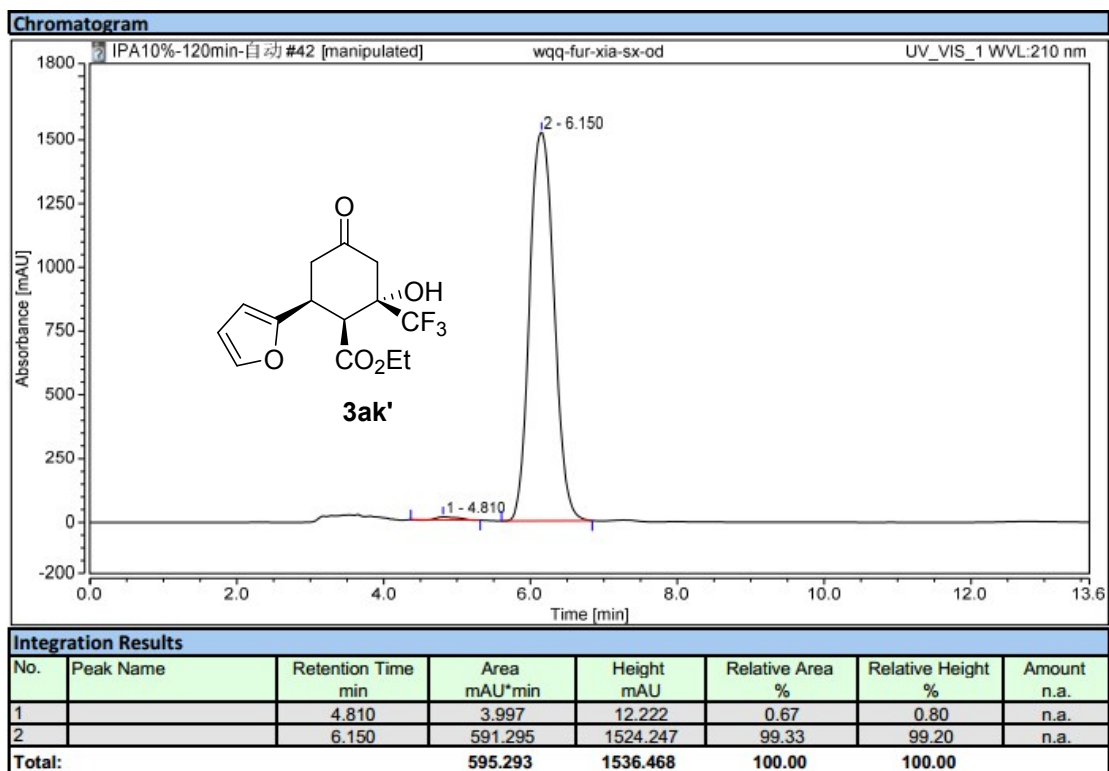

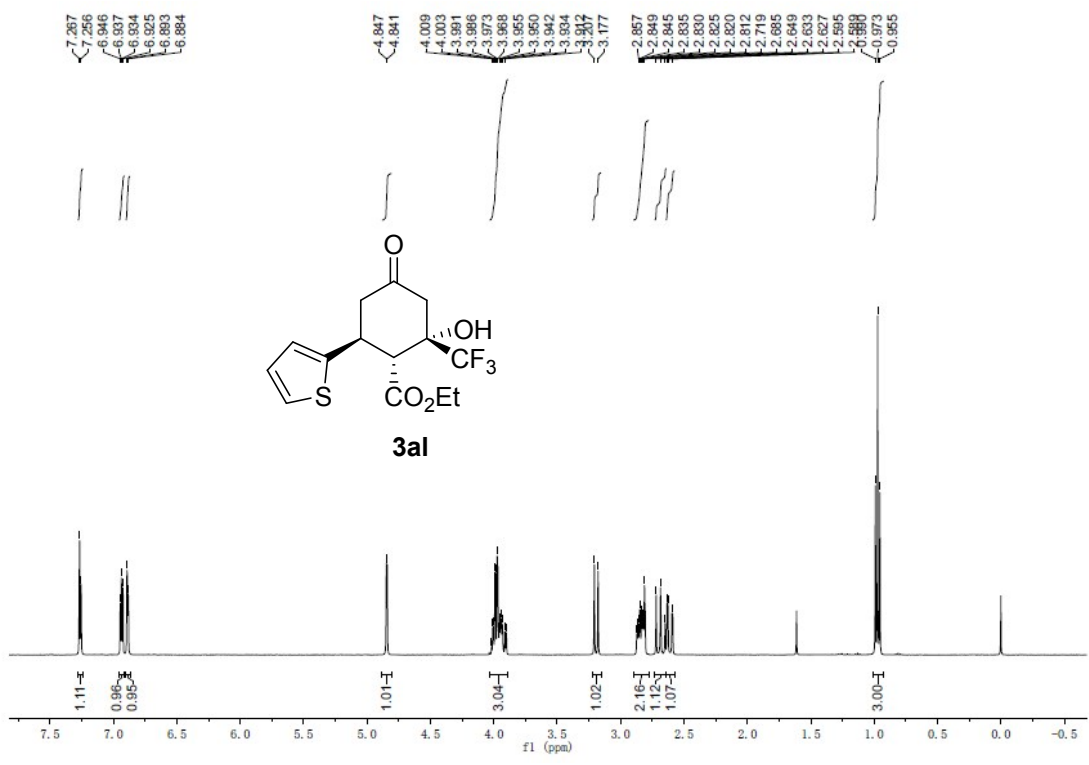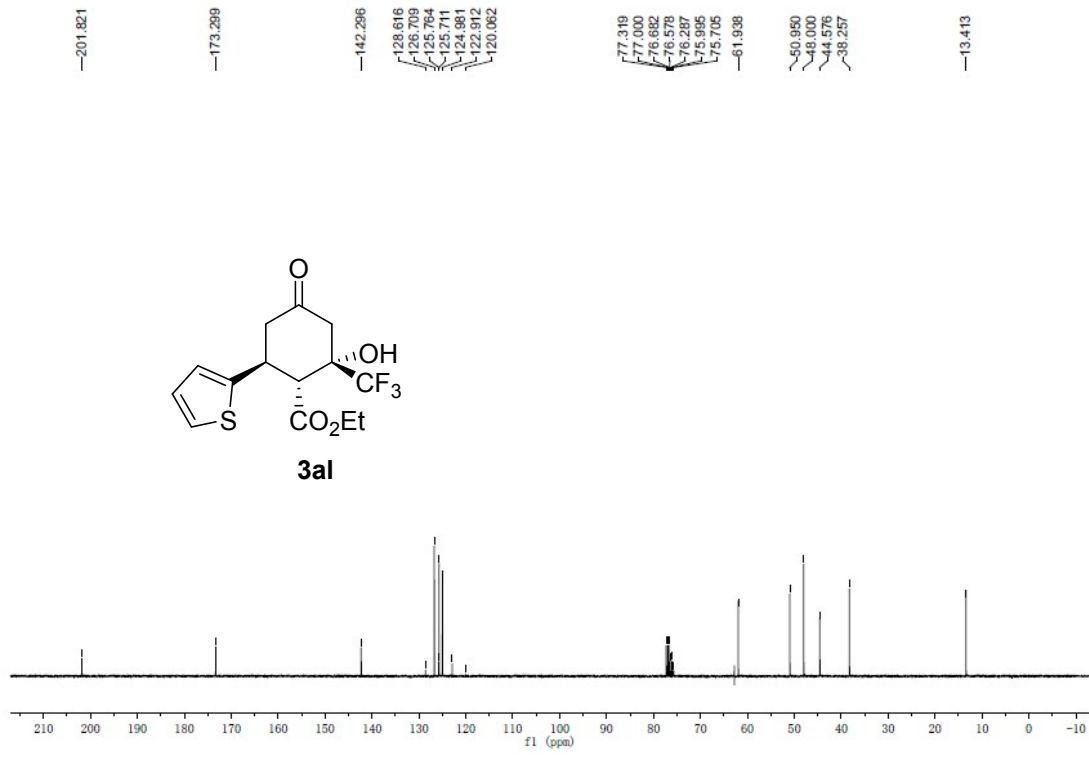

--81.238

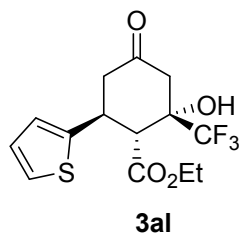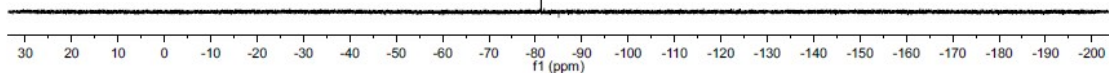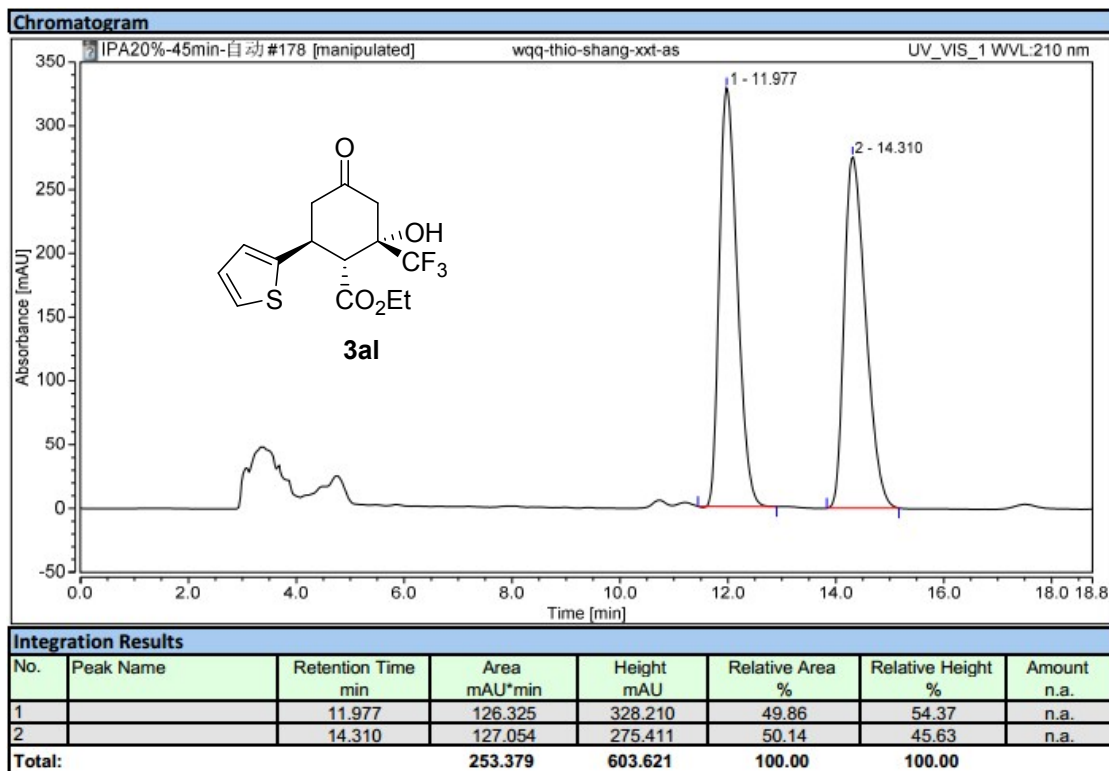



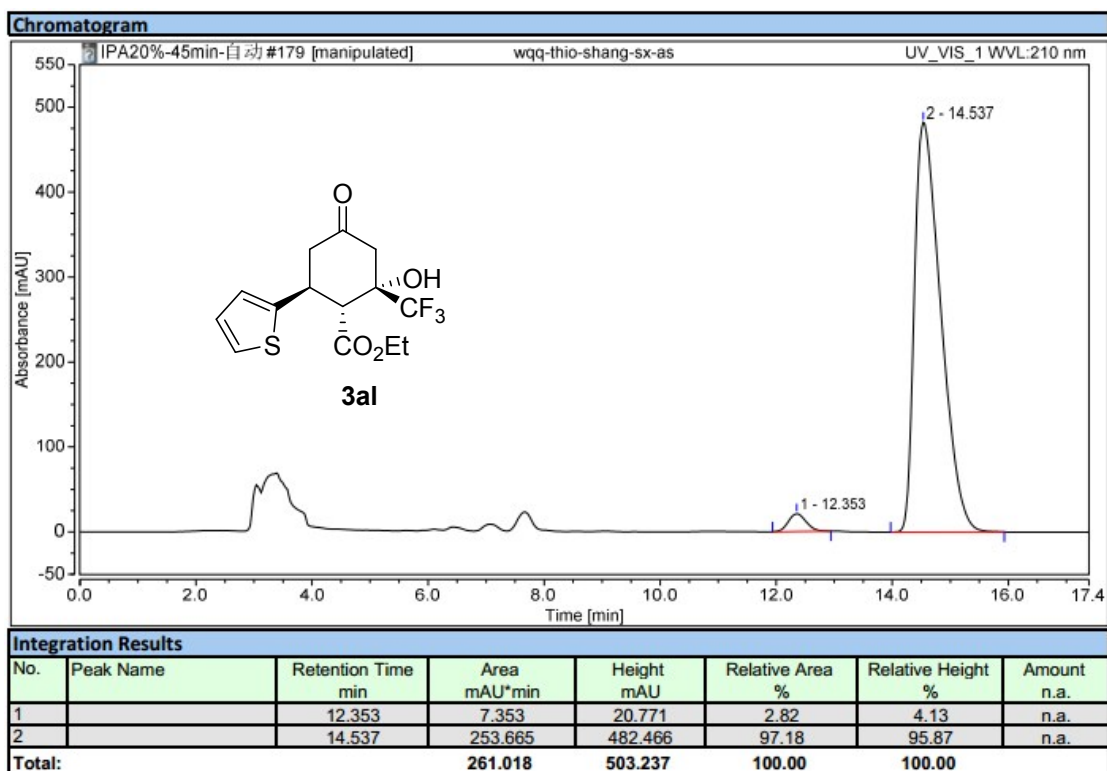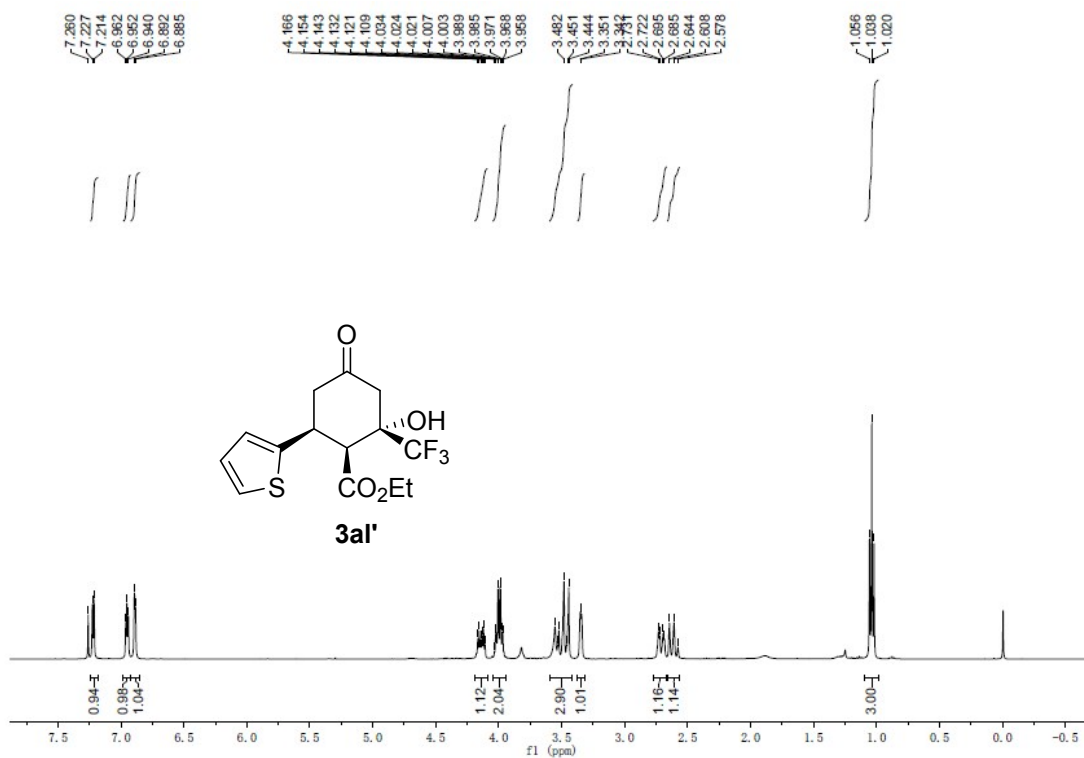

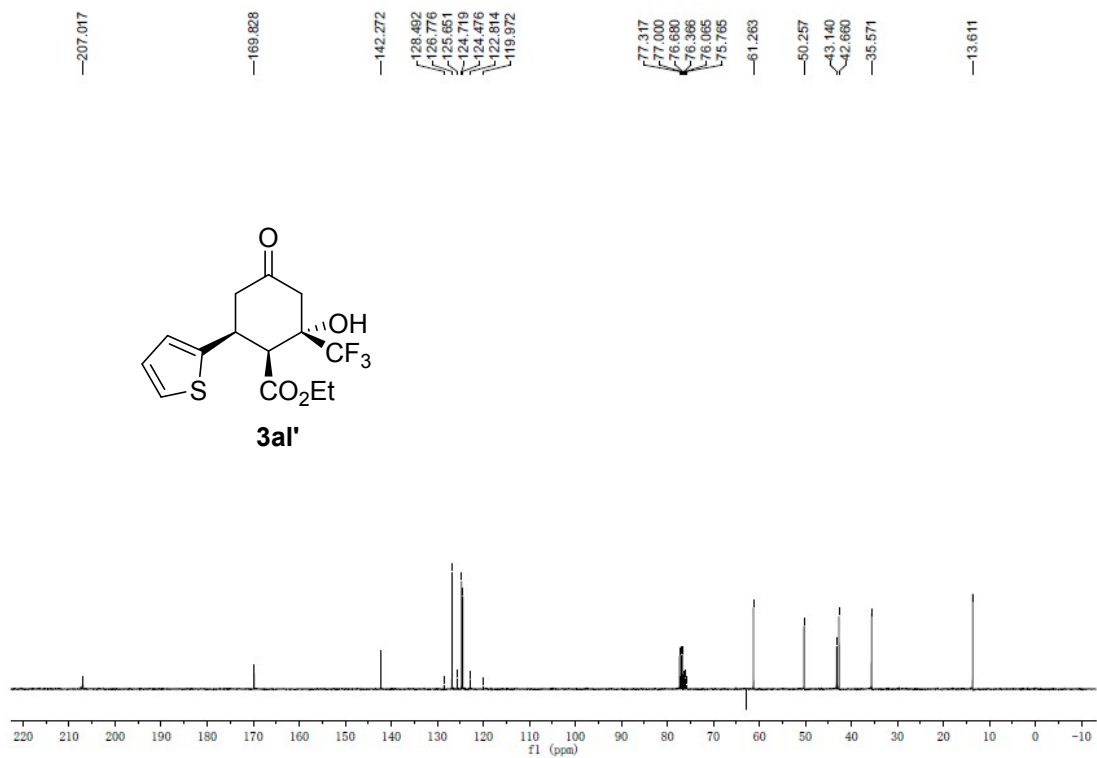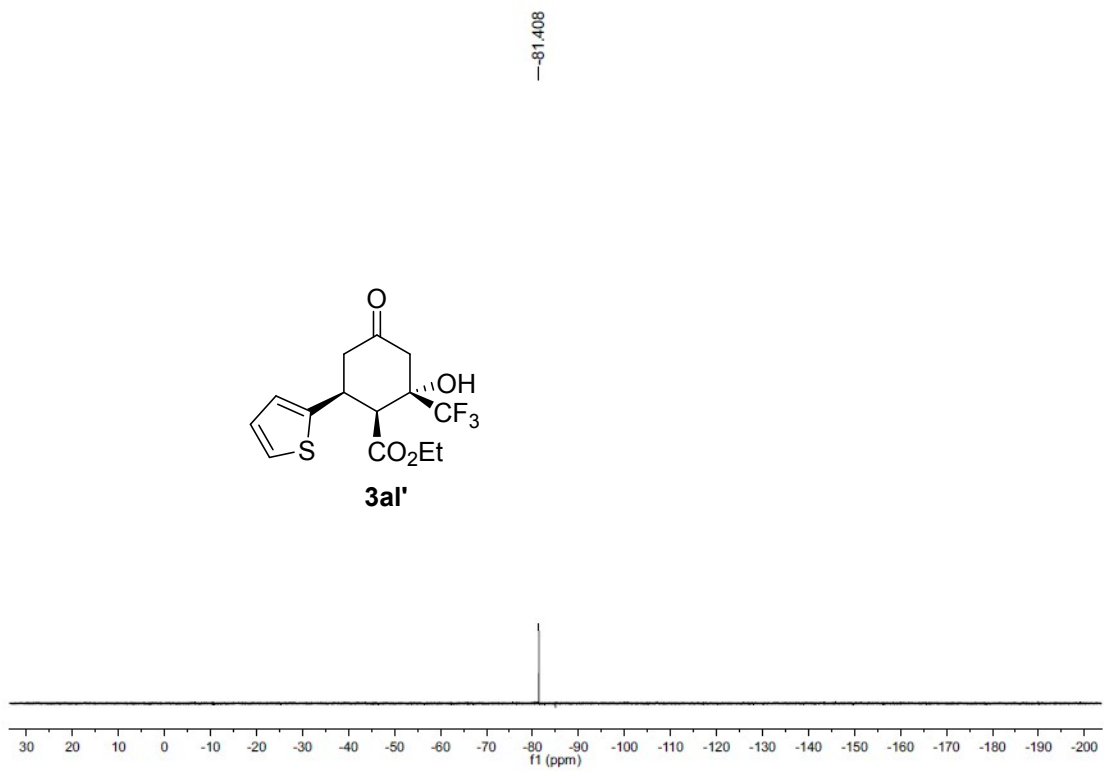

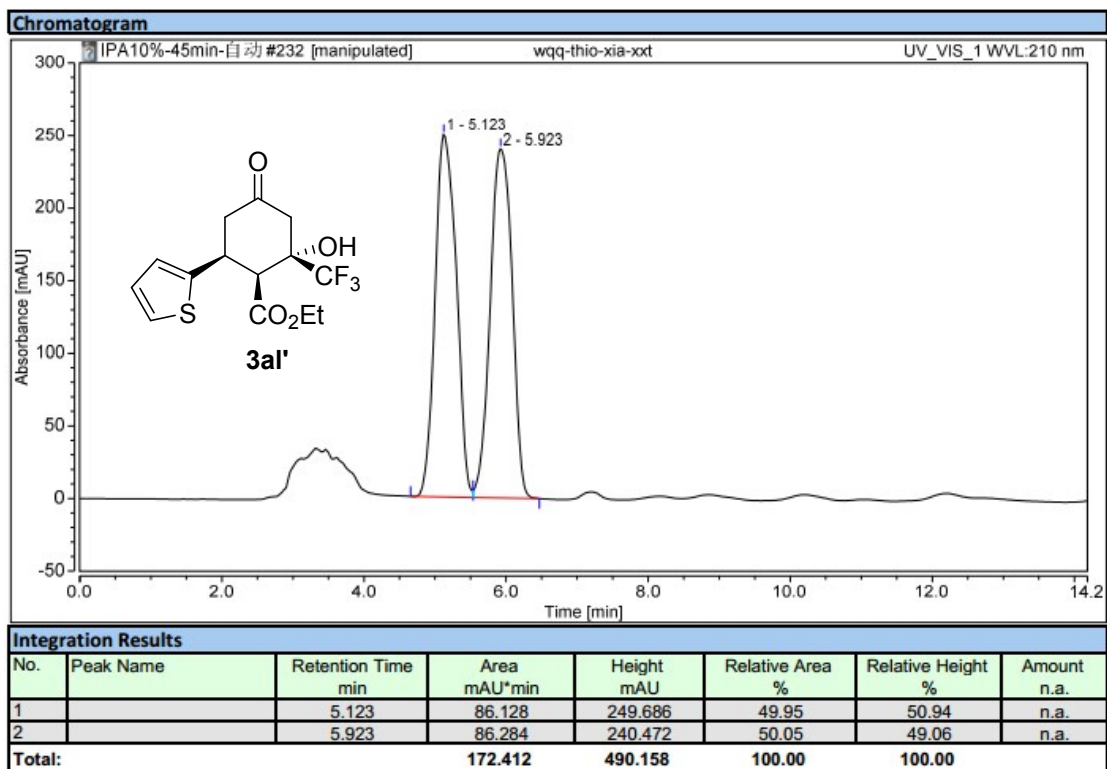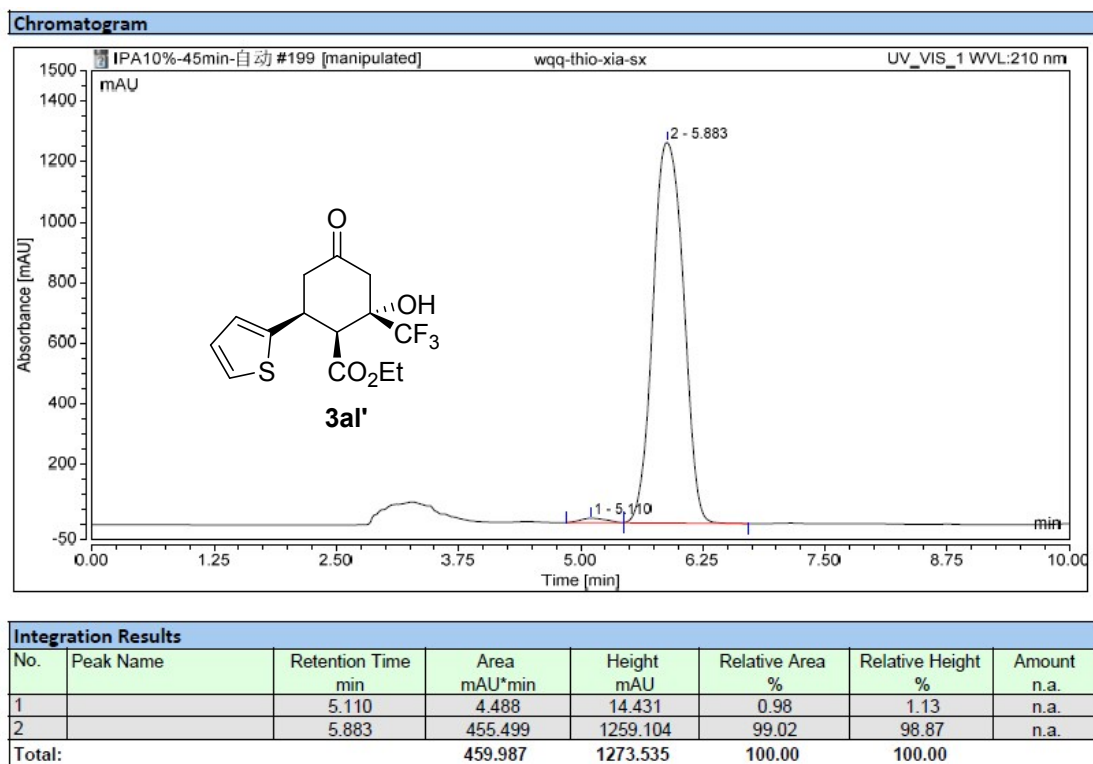

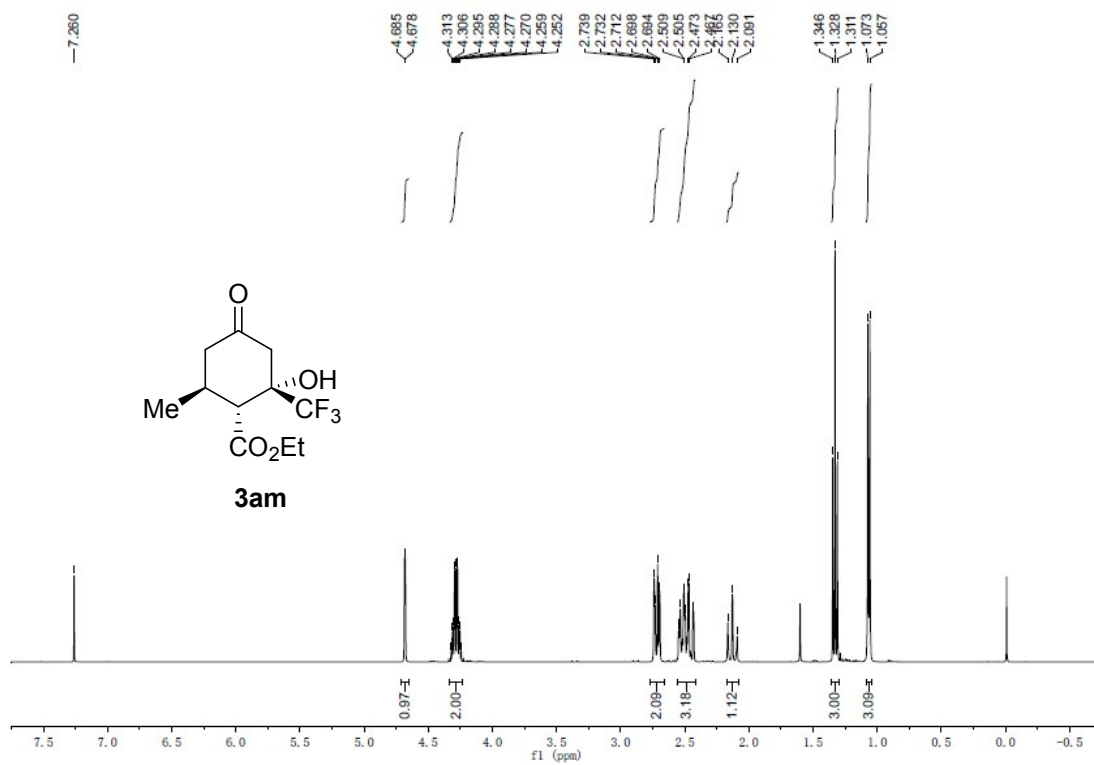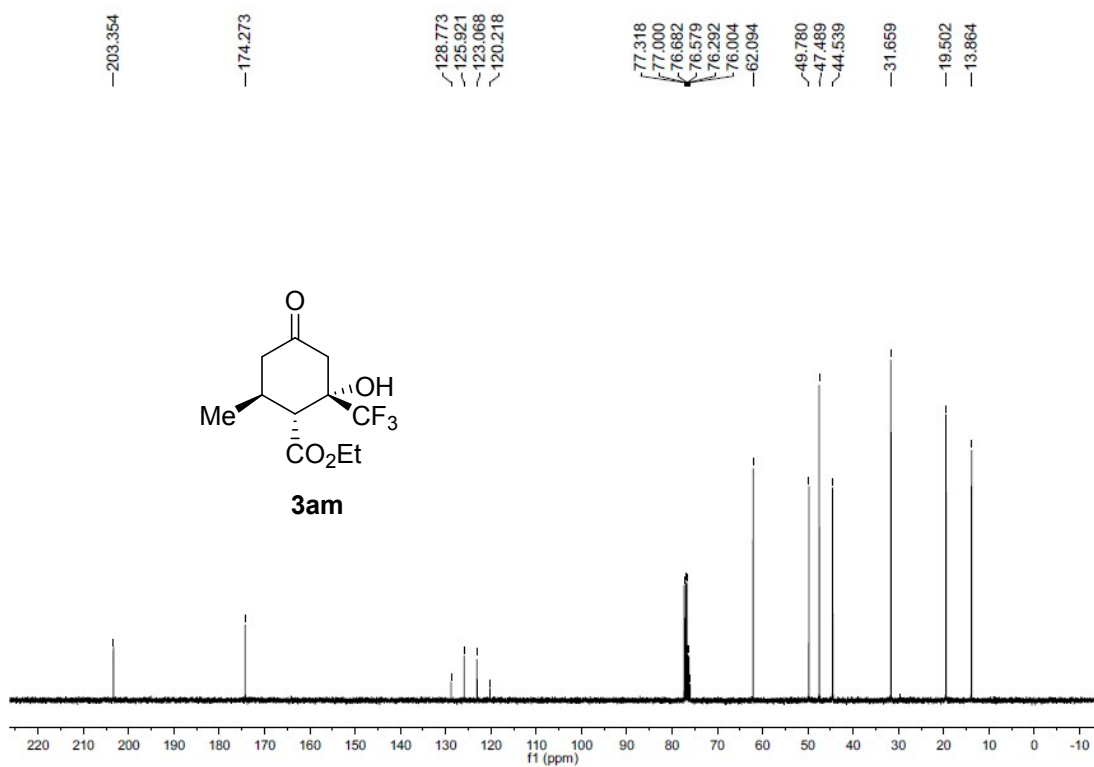

-81.429

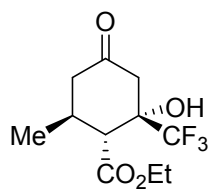

3am

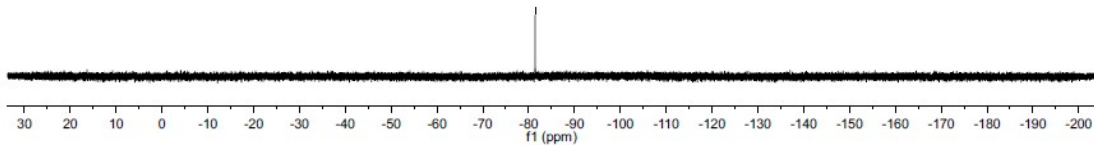

-7.260

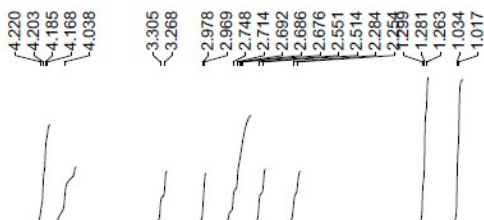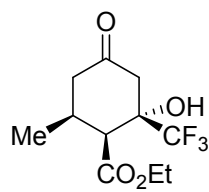

3am'

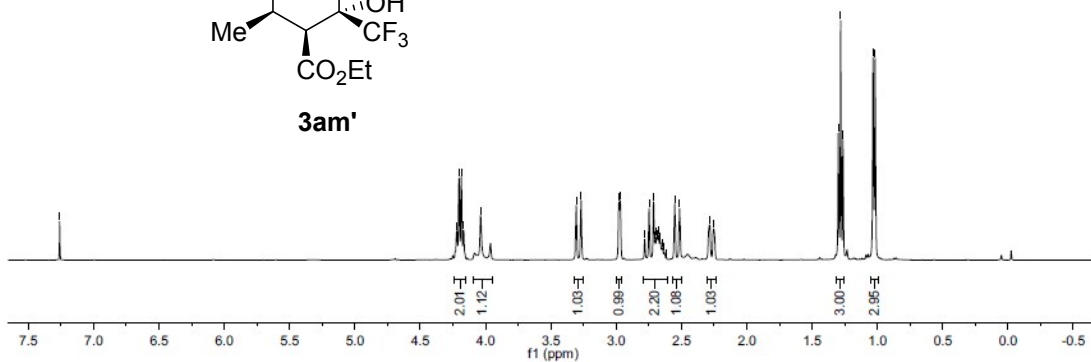

—208.115

—170.367

128.684  
125.846  
123.007  
120.169

77.318  
77.000  
76.858  
76.682  
76.562  
76.265  
75.969  
61.196

48.515  
44.131  
42.904

—29.470

—18.160  
—14.000

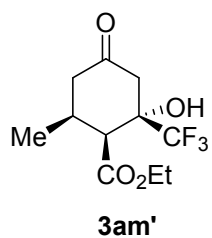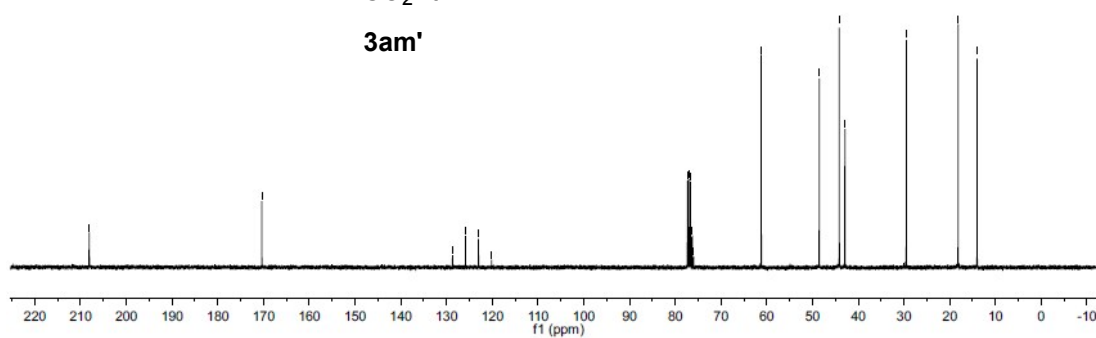

—81.713

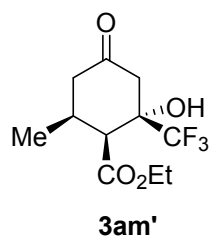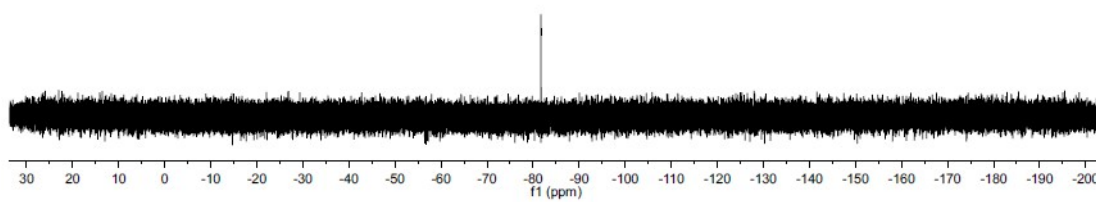

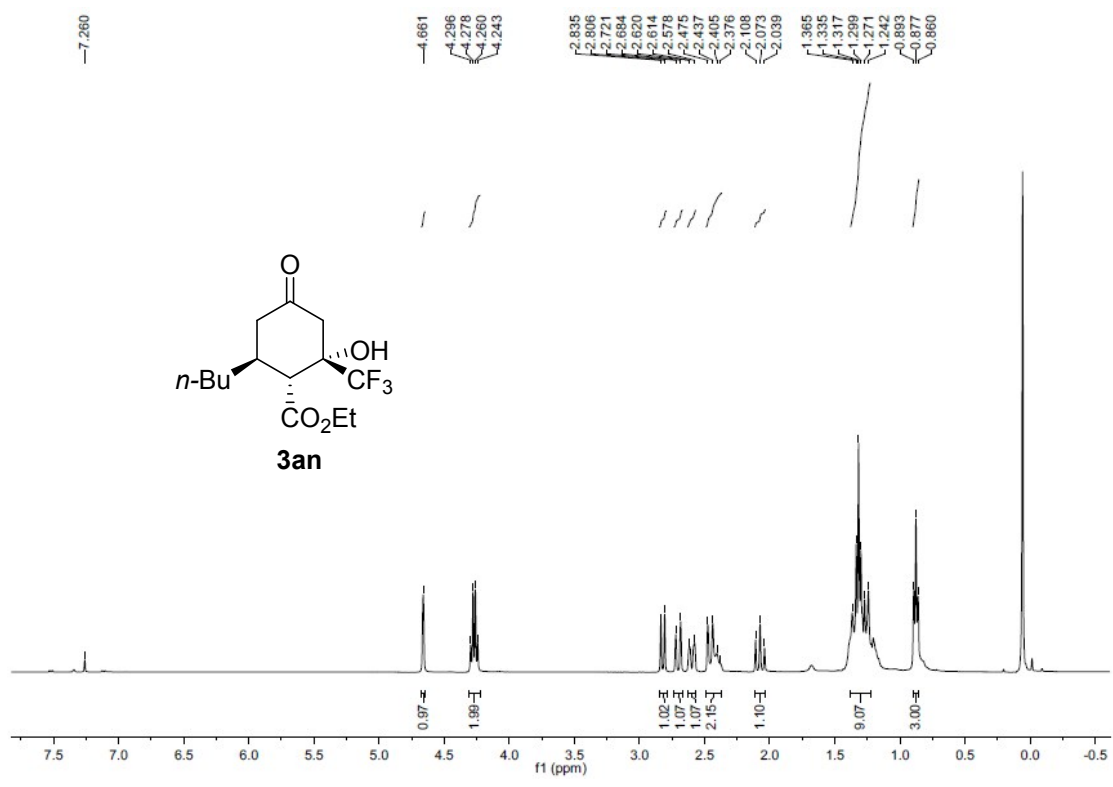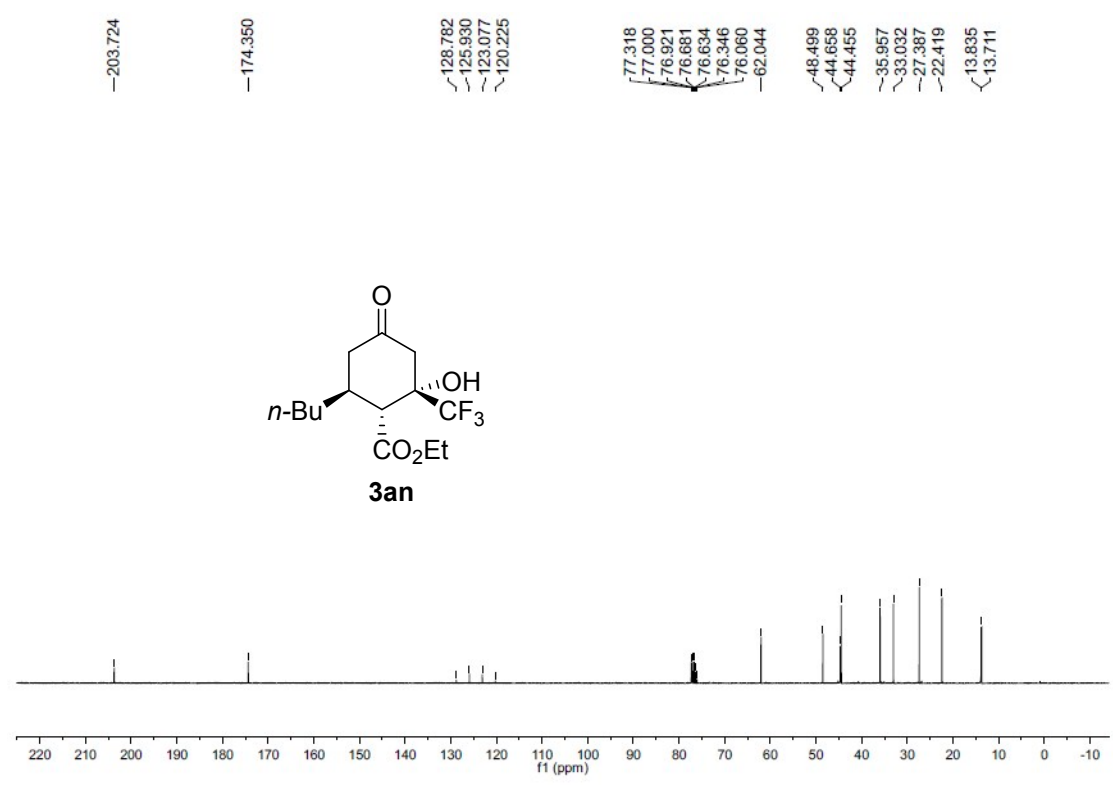

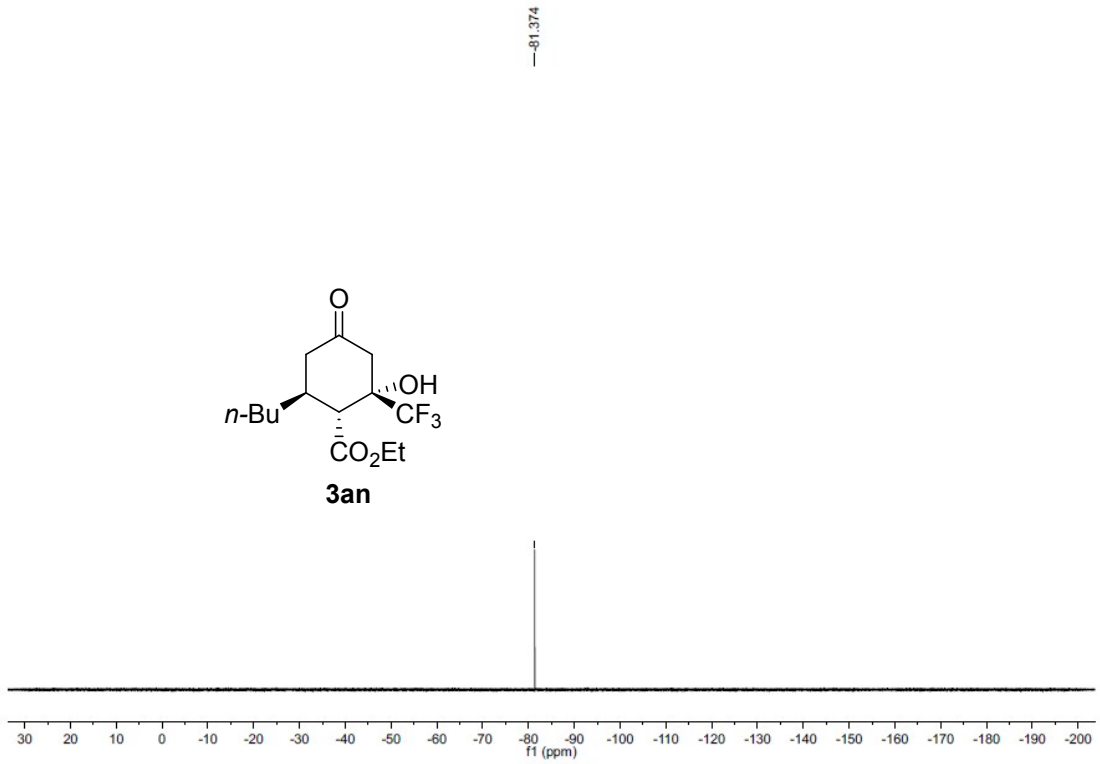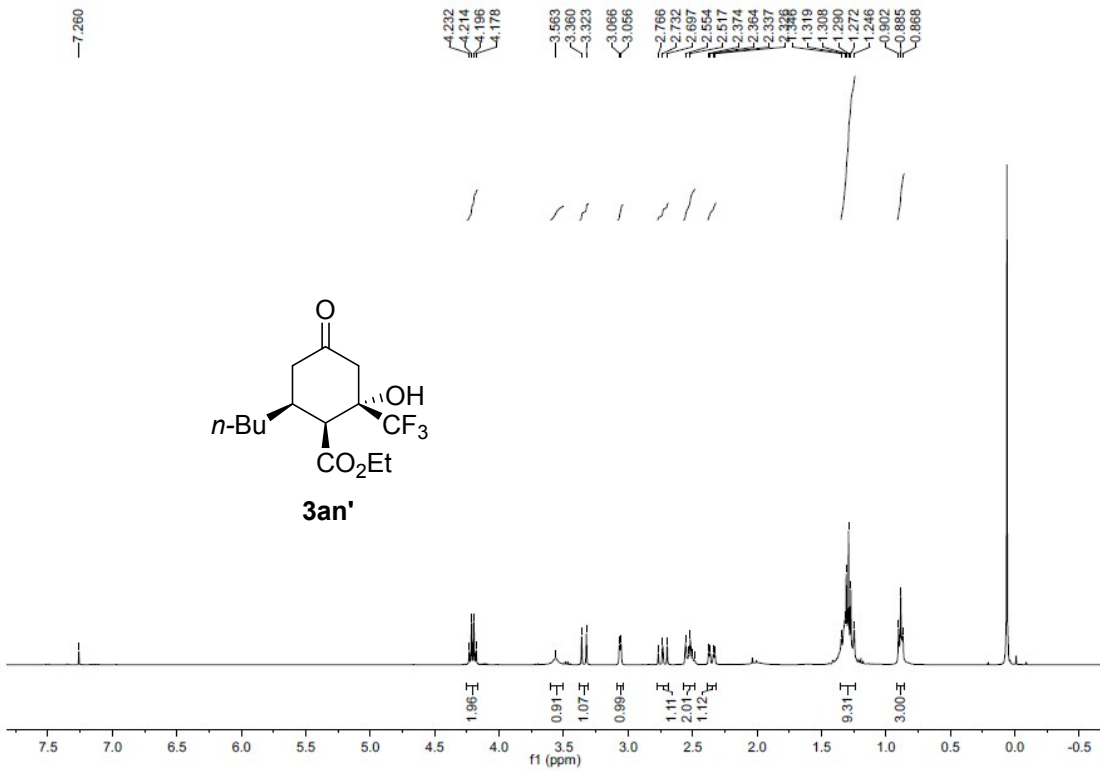



—208.221

—170.423

—128.760  
—125.921  
—123.082  
—120.242

—77.319  
—77.001  
—76.815  
—76.683  
—76.516  
—76.221  
—75.924  
—61.112

—47.011  
—43.281  
—42.772

—34.593  
—32.766  
—28.754  
—22.493

—13.963  
—13.817

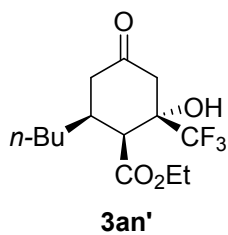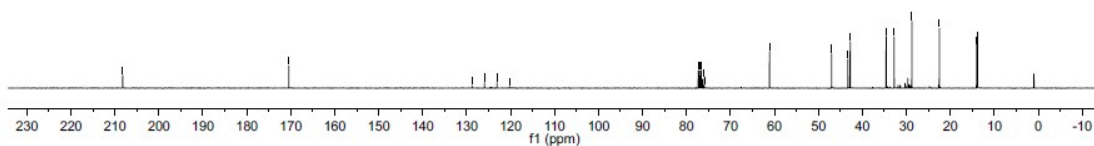

—81.646

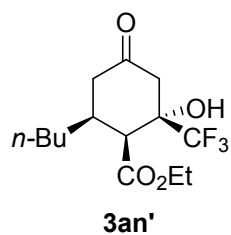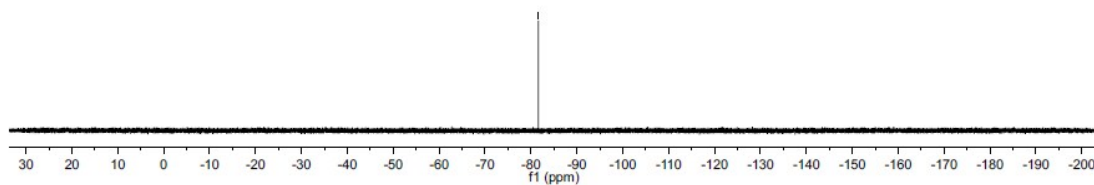

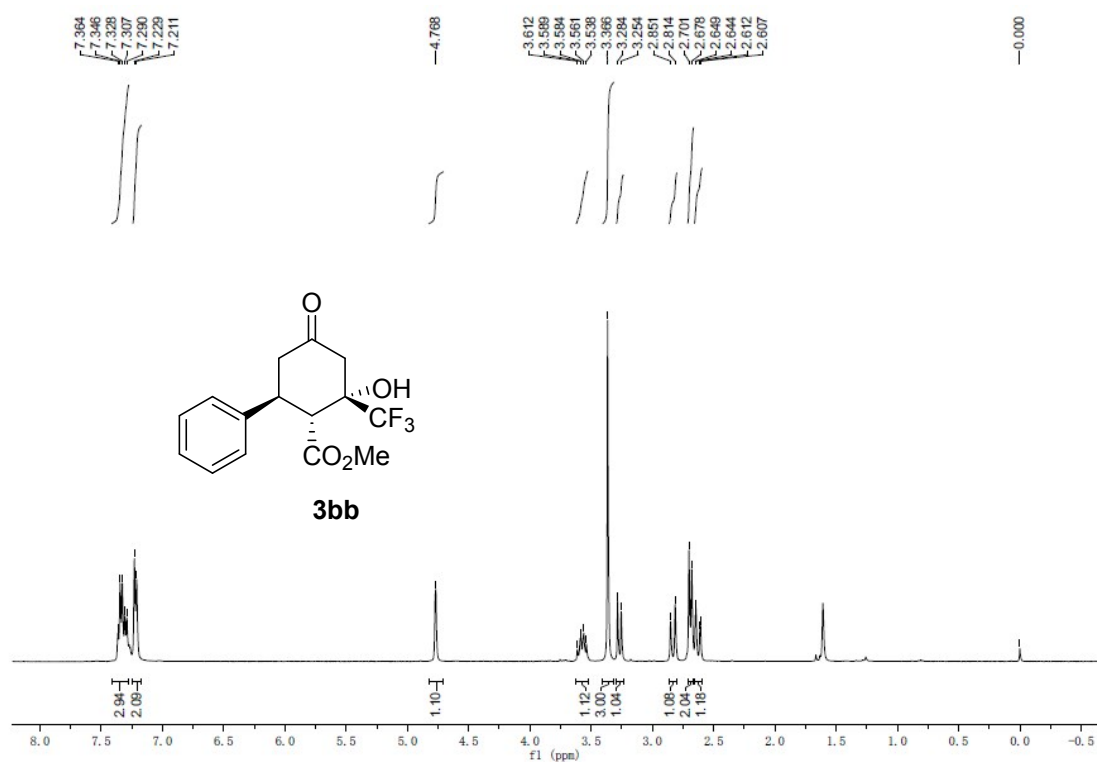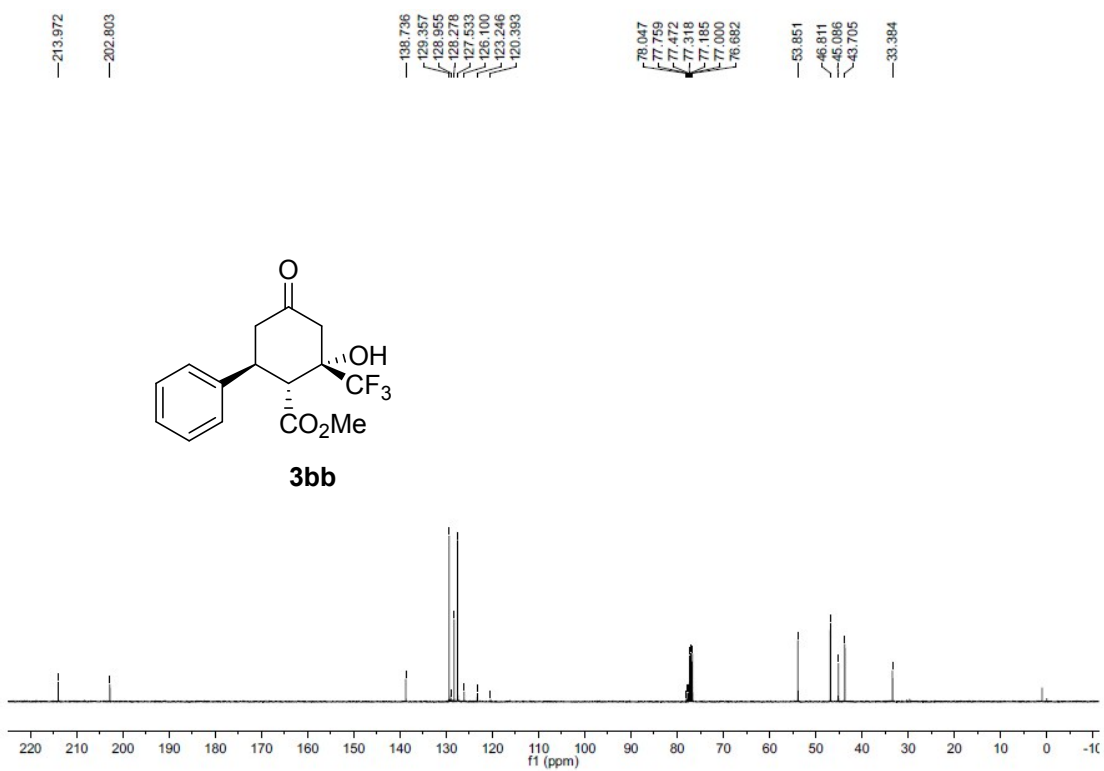

-81.533

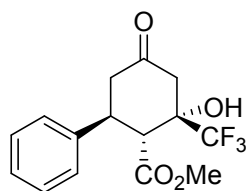

**3bb**

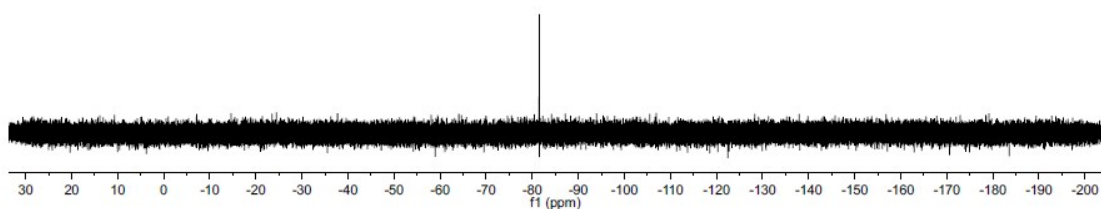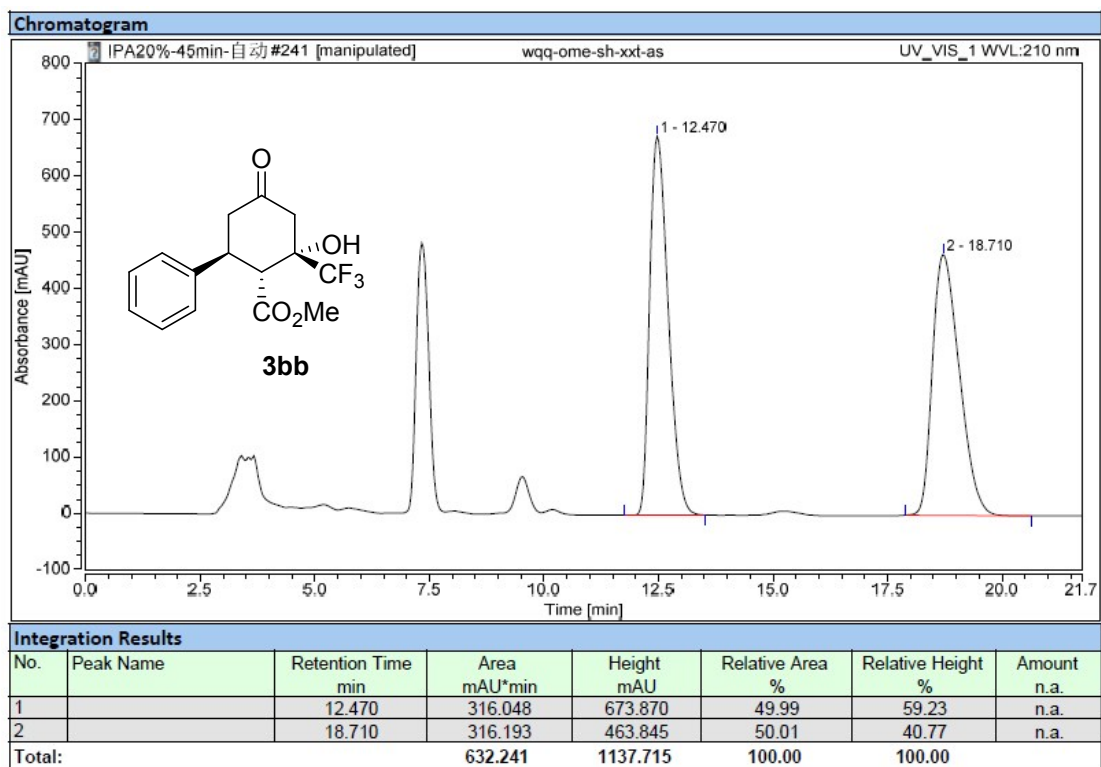

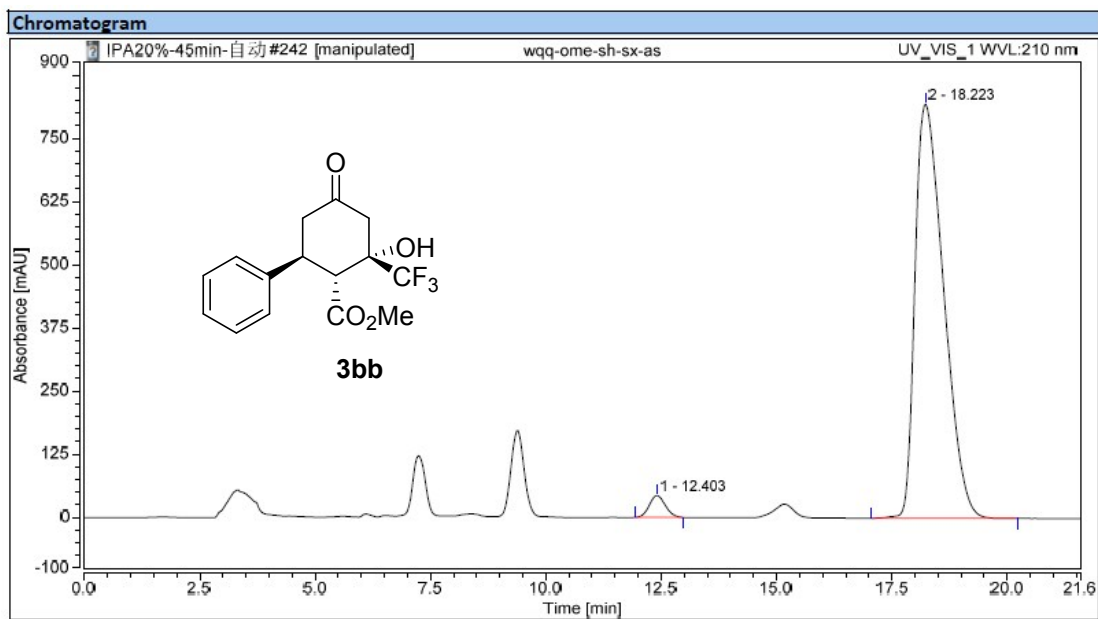

**Integration Results**

| No.           | Peak Name | Retention Time<br>min | Area<br>mAU*min | Height<br>mAU  | Relative Area<br>% | Relative Height<br>% | Amount |
|---------------|-----------|-----------------------|-----------------|----------------|--------------------|----------------------|--------|
| 1             |           | 12.403                | 17.349          | 43.227         | 2.86               | 5.01                 | n.a.   |
| 2             |           | 18.223                | 588.560         | 819.183        | 97.14              | 94.99                | n.a.   |
| <b>Total:</b> |           |                       | <b>605.910</b>  | <b>862.410</b> | <b>100.00</b>      | <b>100.00</b>        |        |

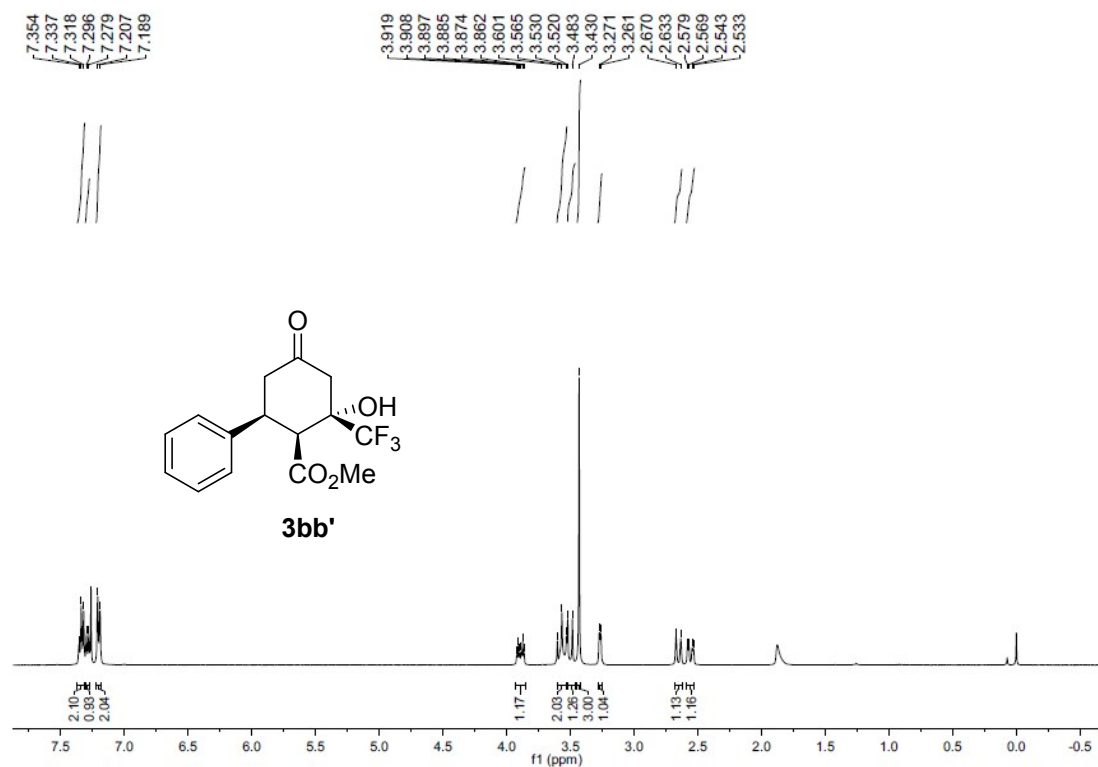

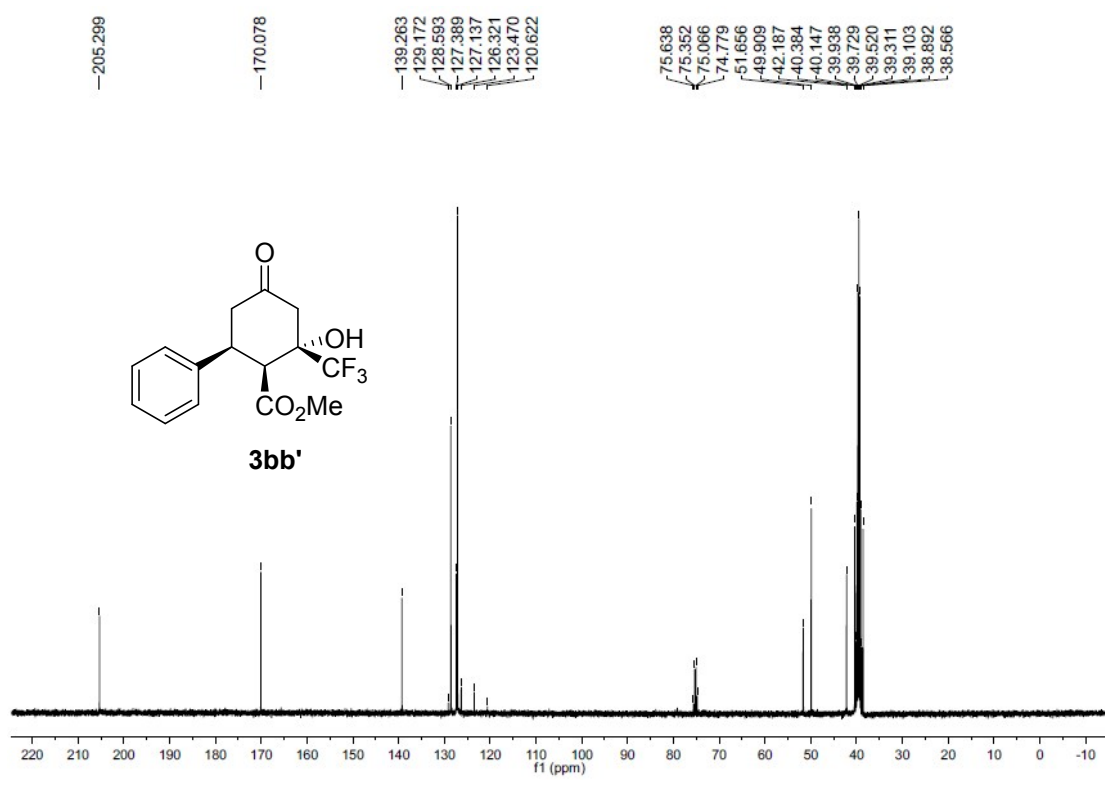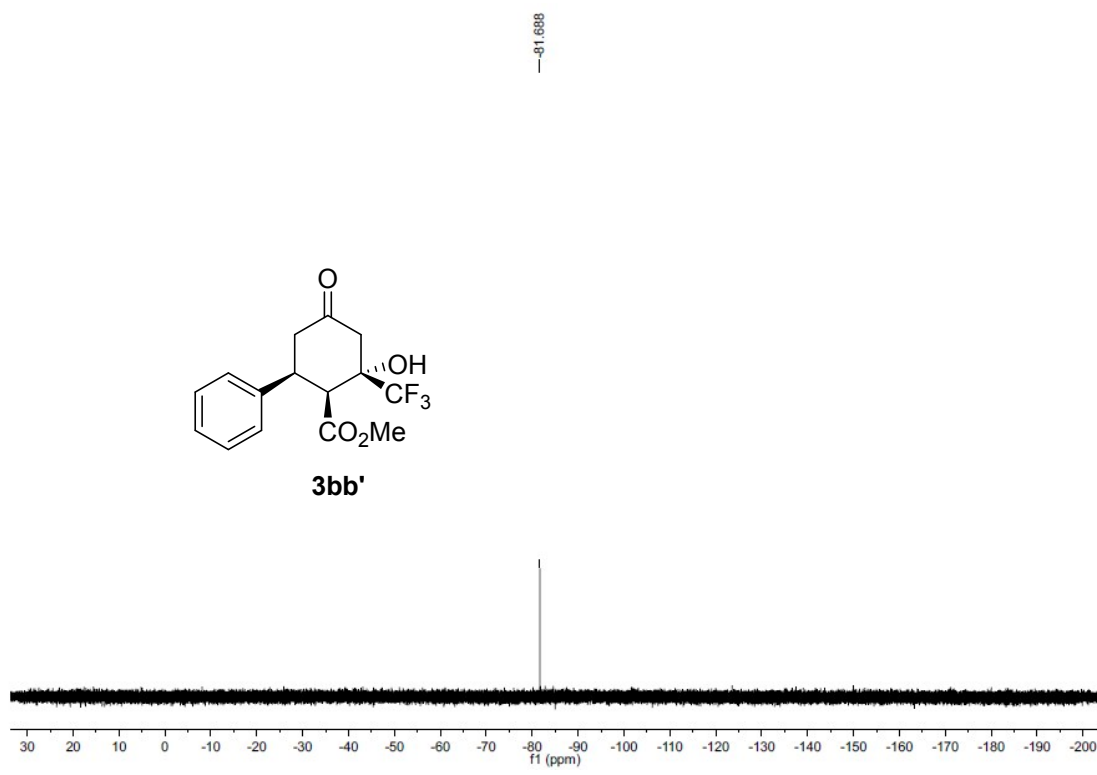

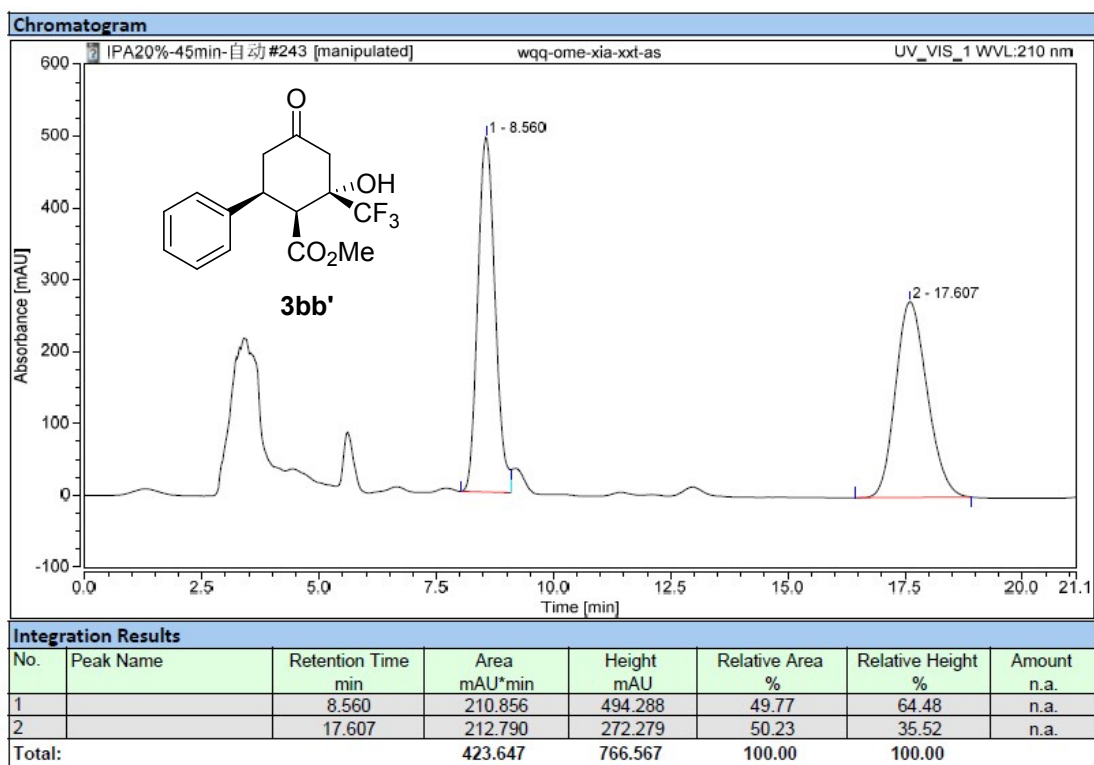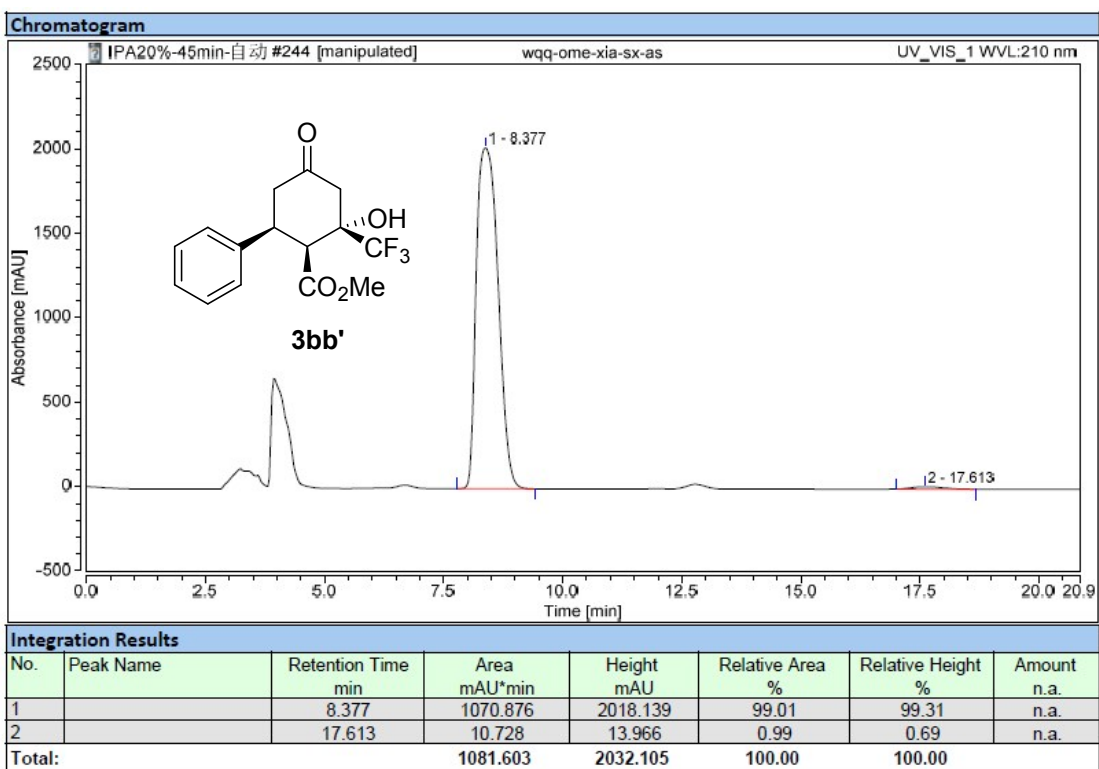

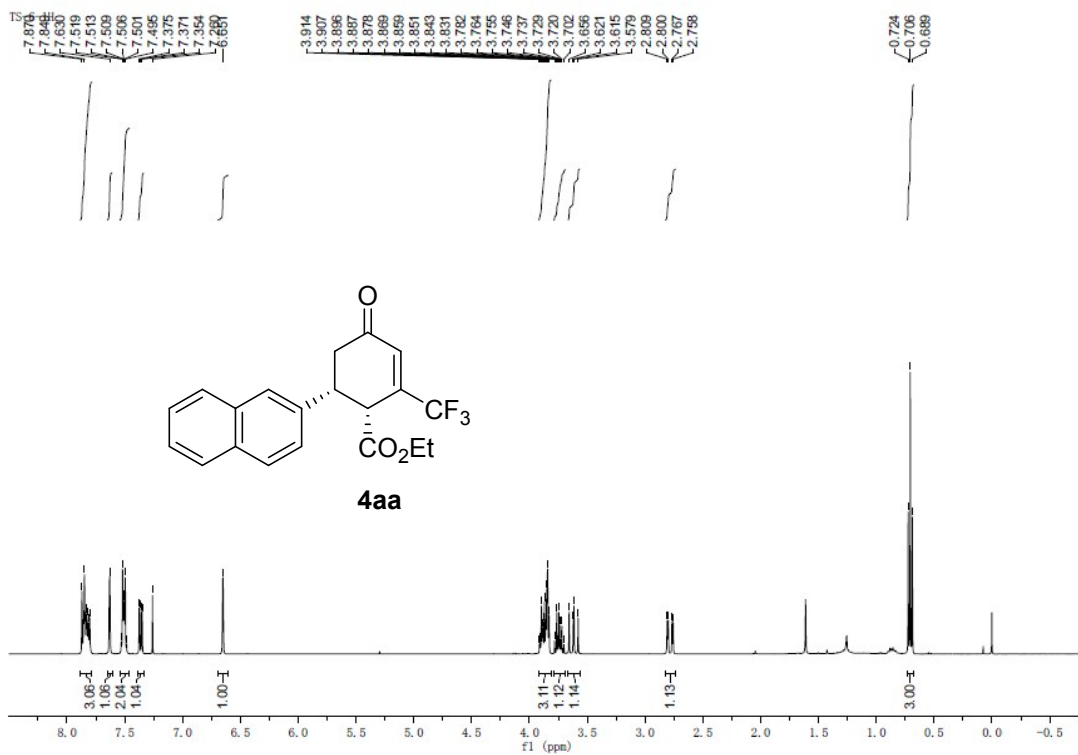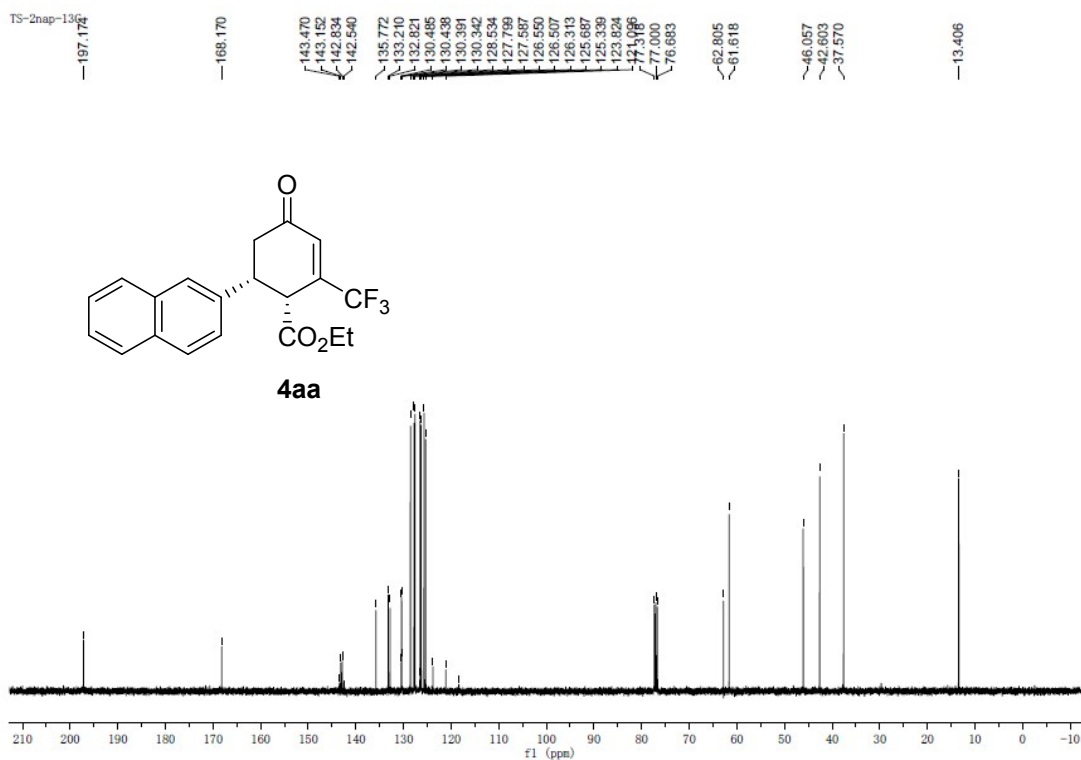

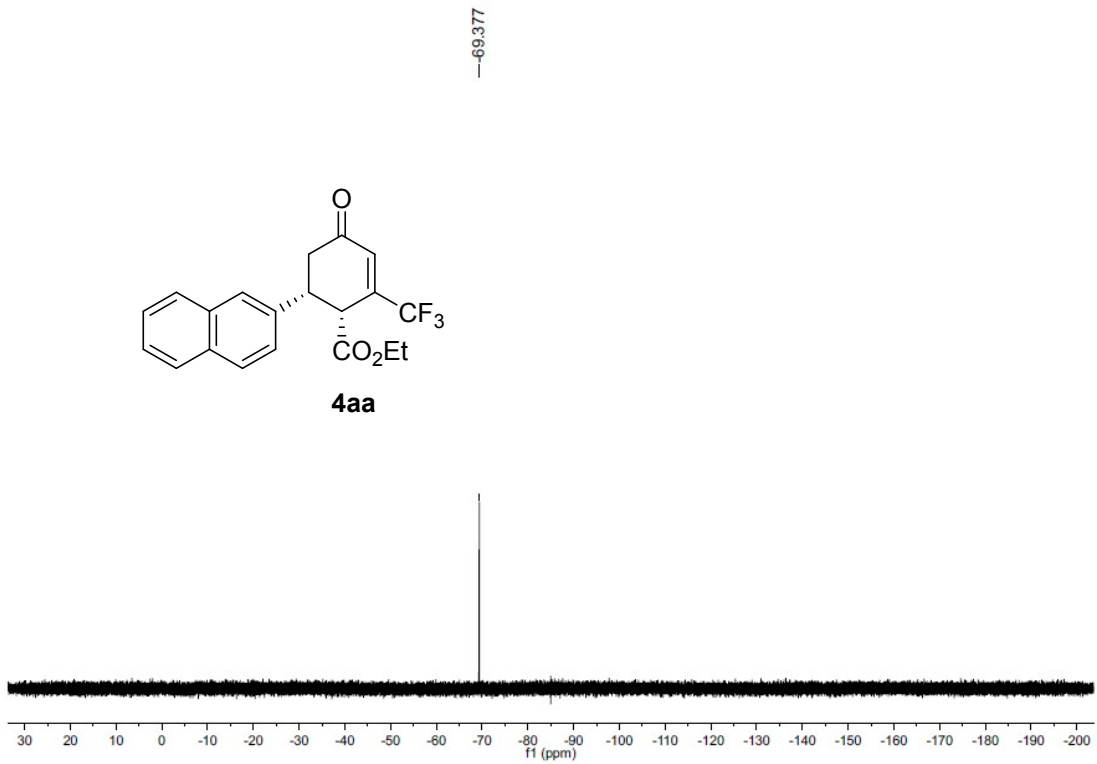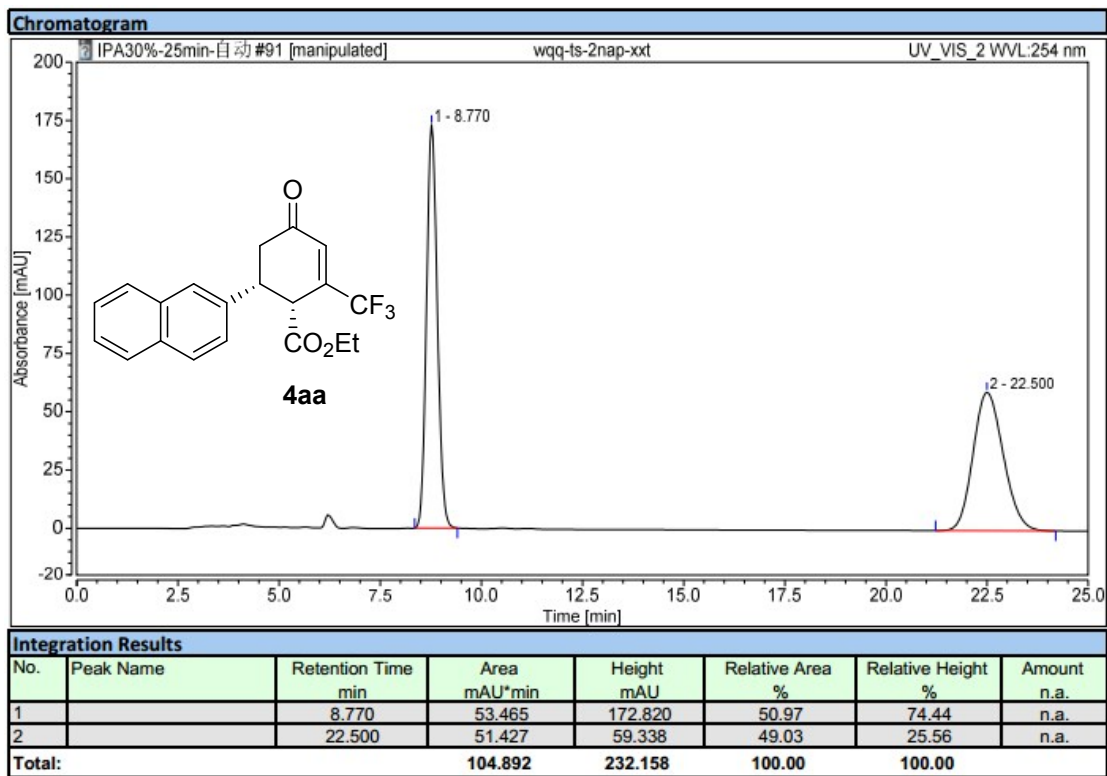



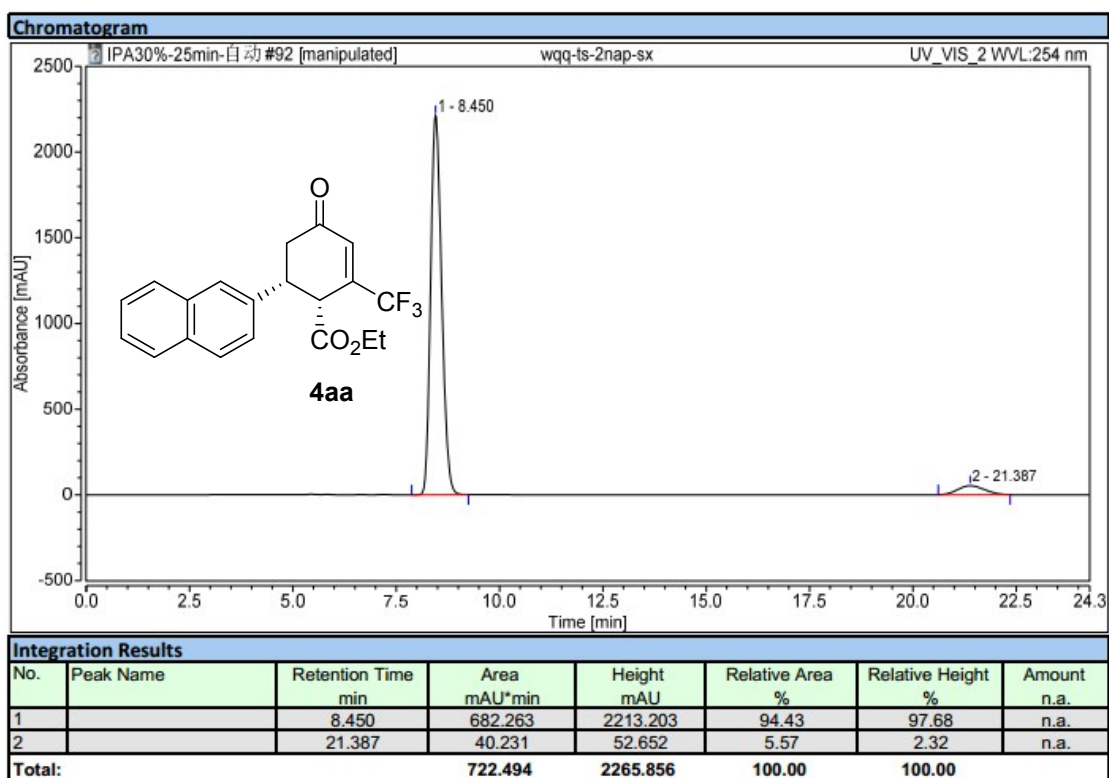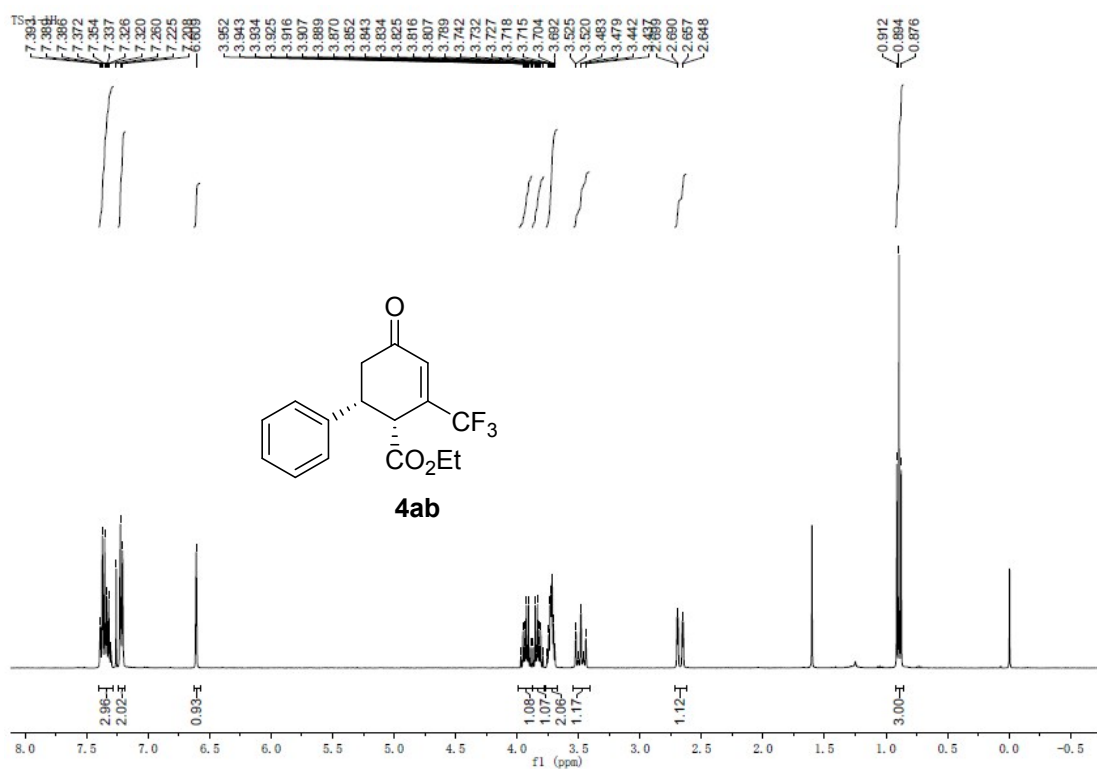

TS-Ph-13C  
—197.204

—168.126

143.396  
143.078  
142.760  
142.442  
138.372  
138.370  
130.323  
130.275  
130.228  
128.729  
127.954  
127.077  
126.508  
123.779  
121.050  
118.322

77.319  
77.000  
76.682

—61.545

46.160  
42.489  
37.361

—13.490

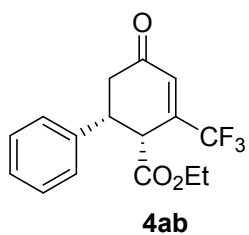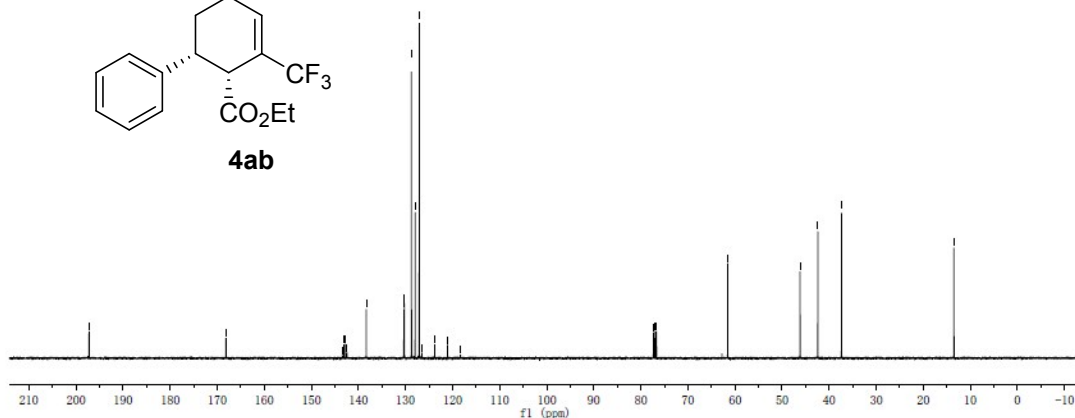

—69.458

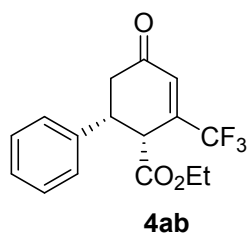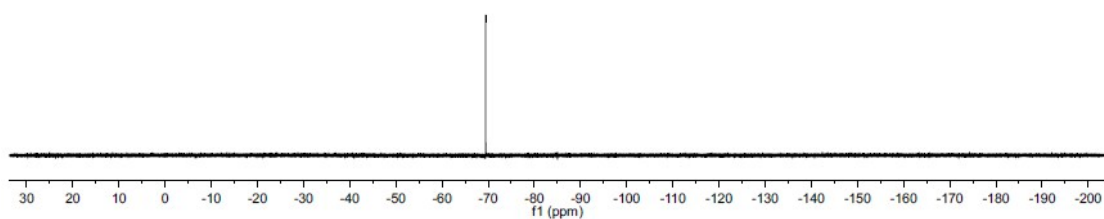

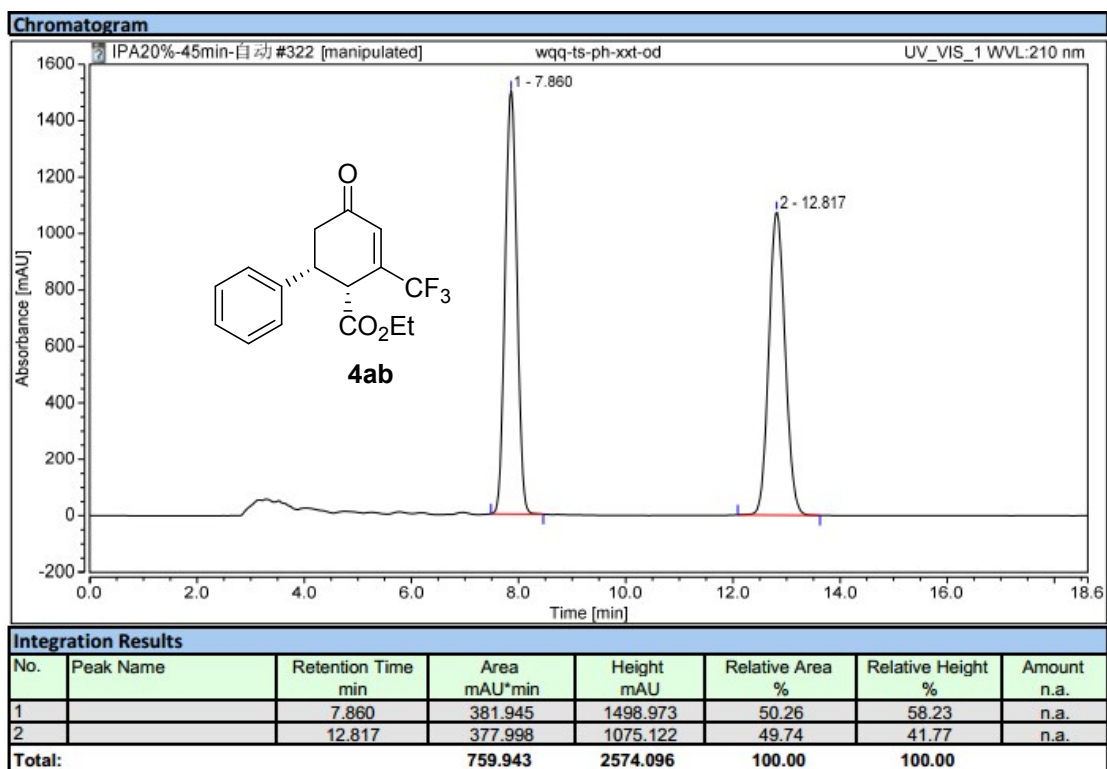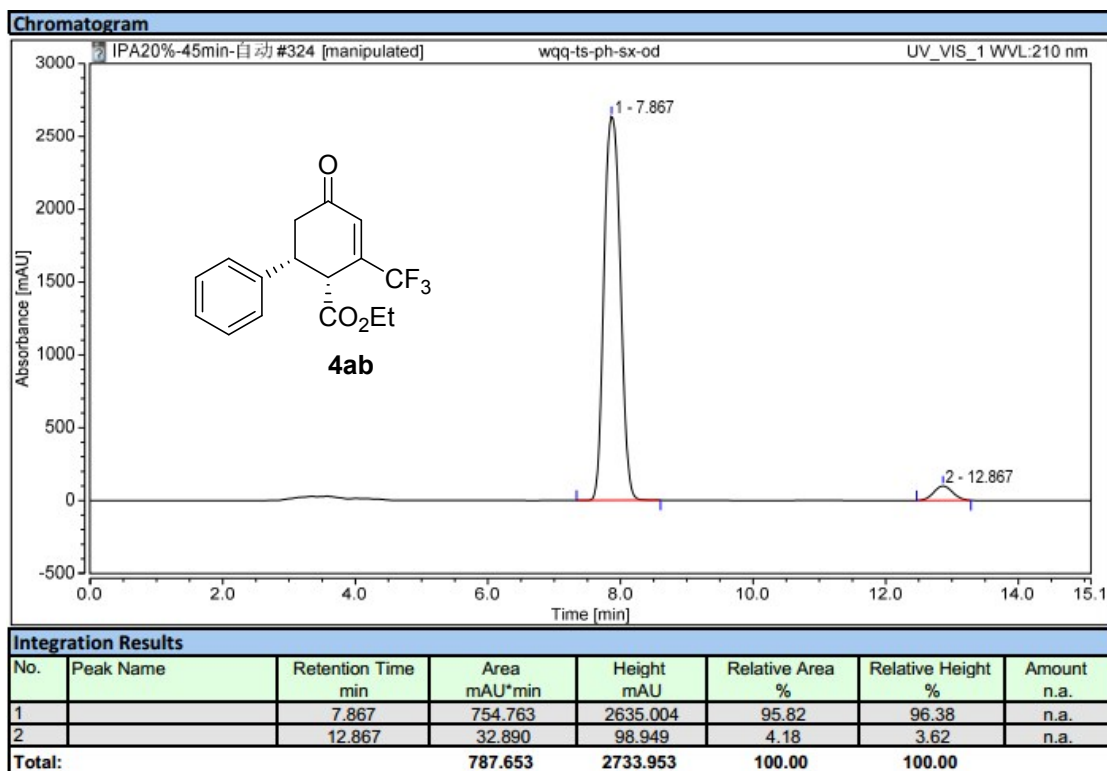

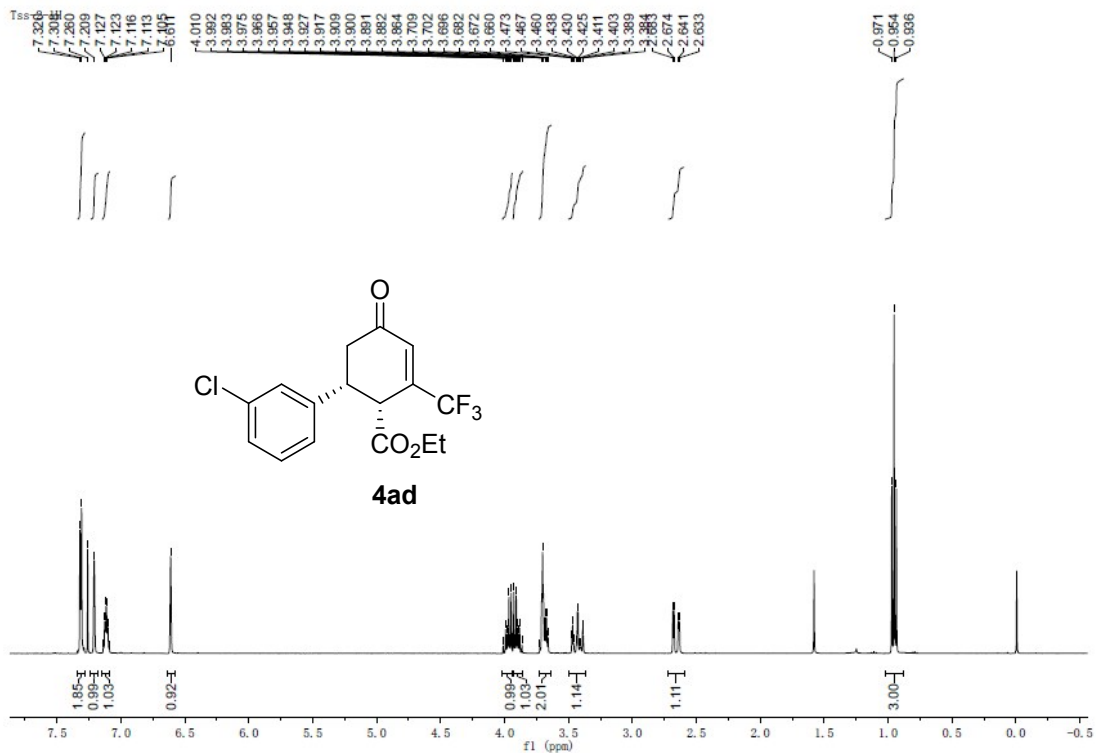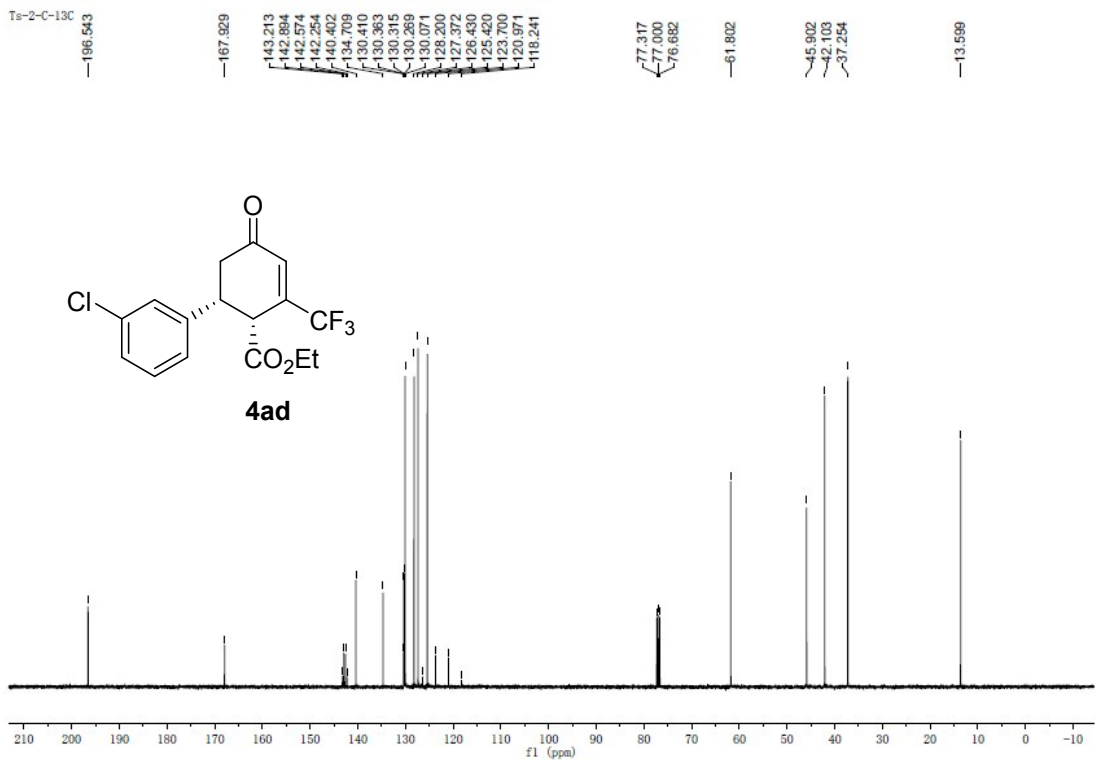

—69.423

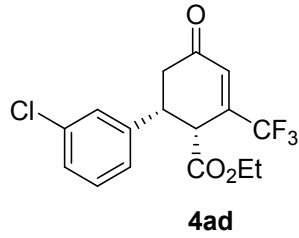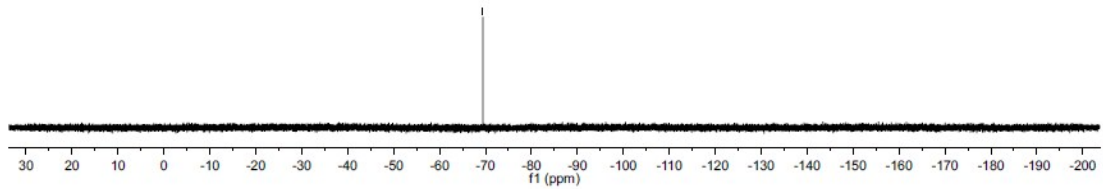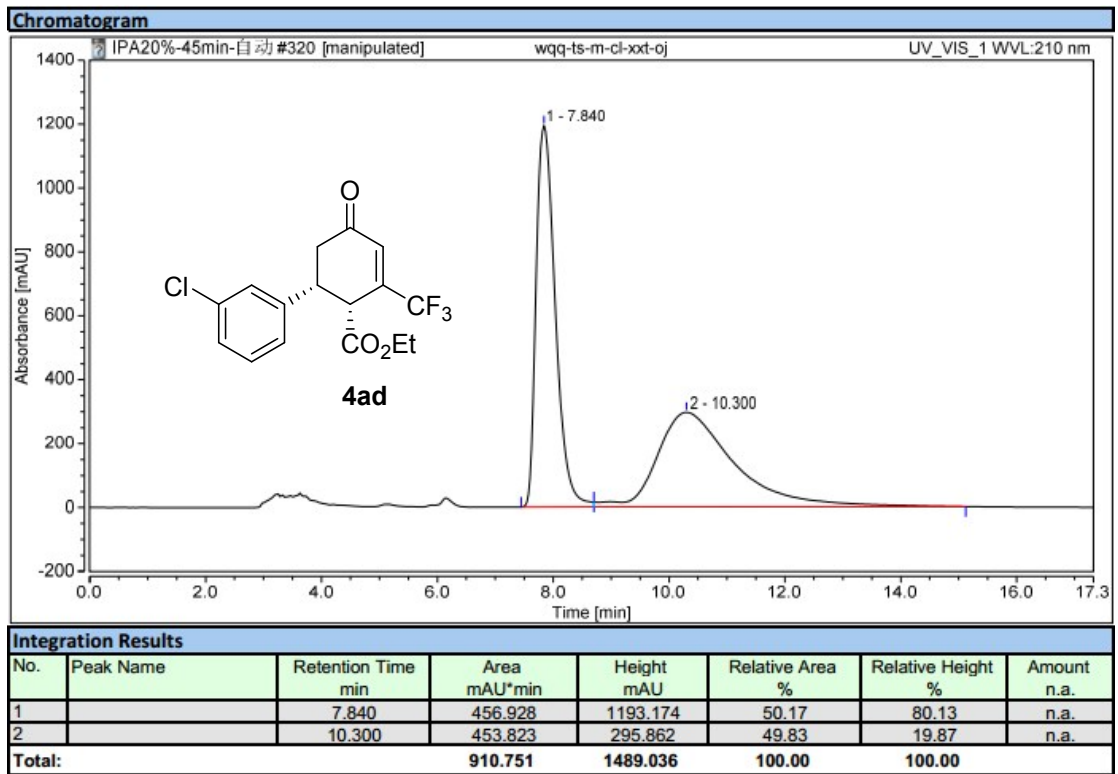

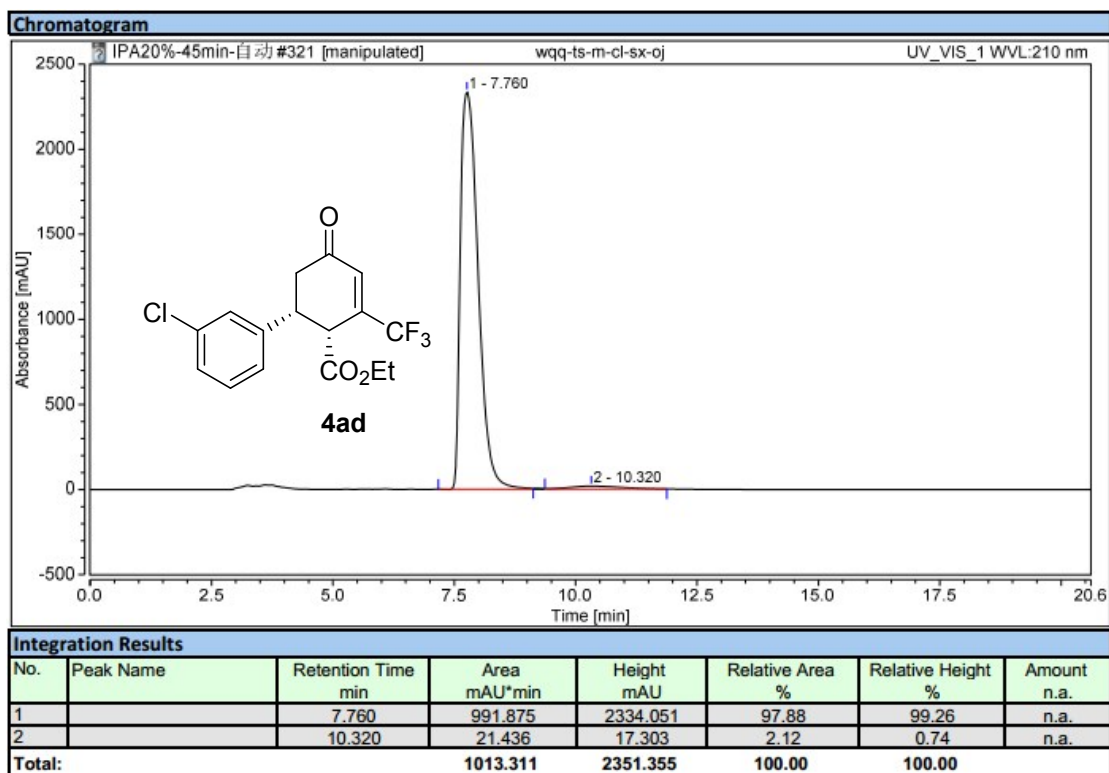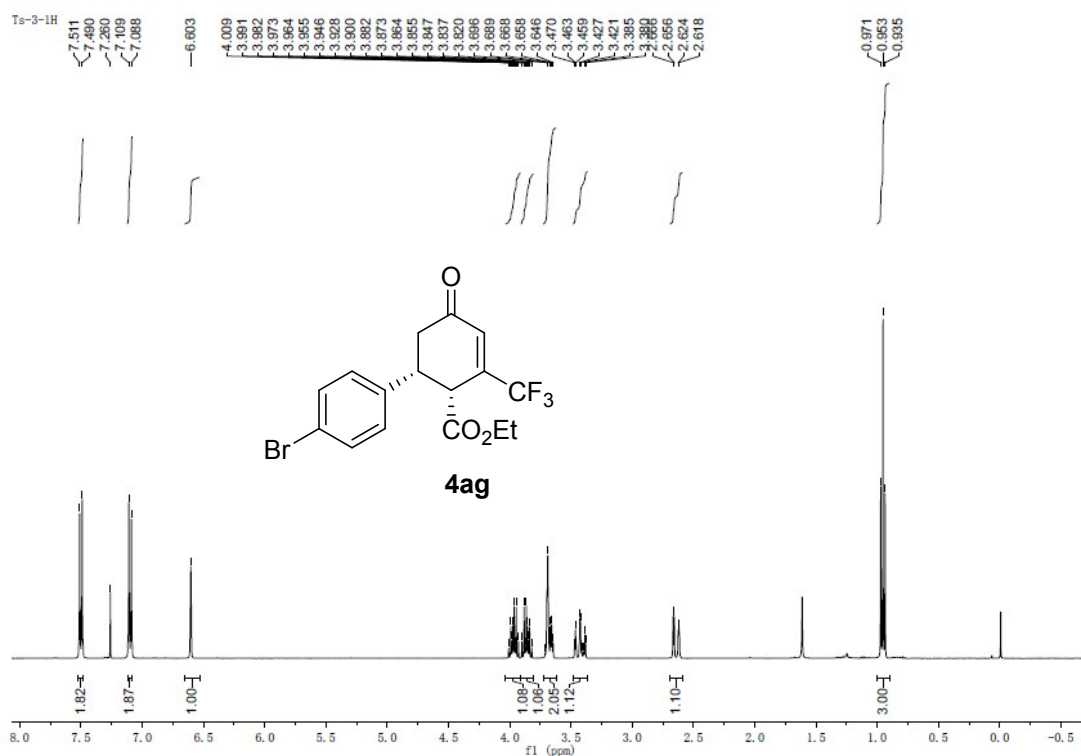

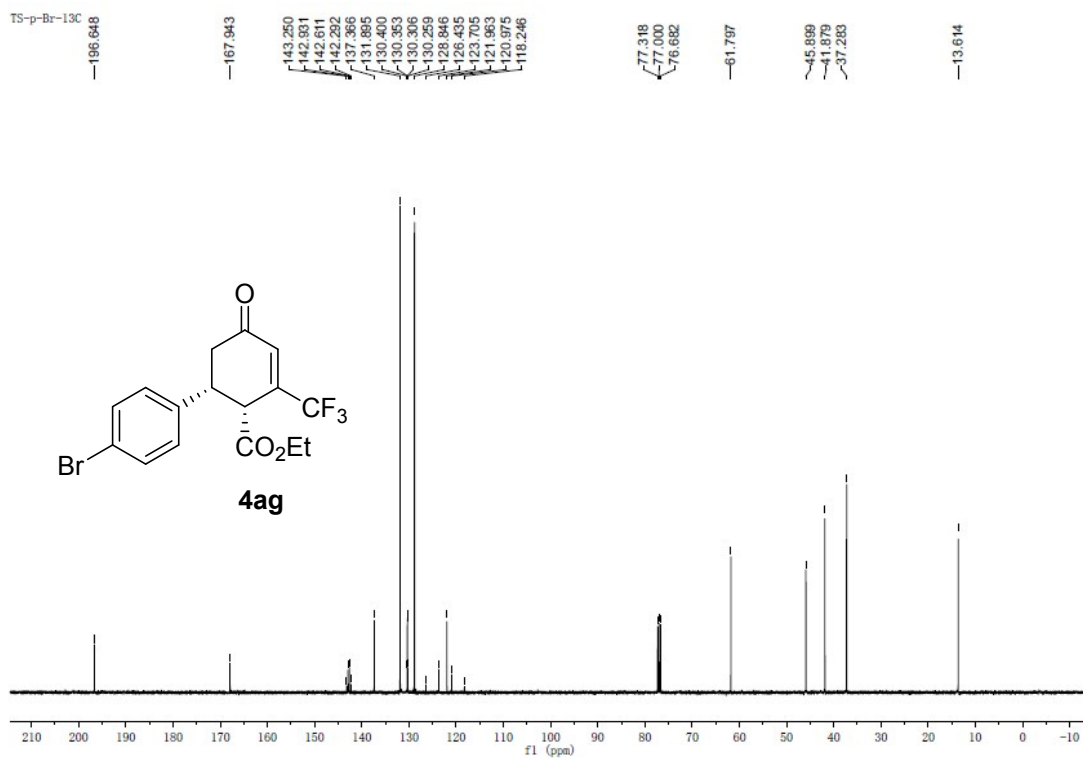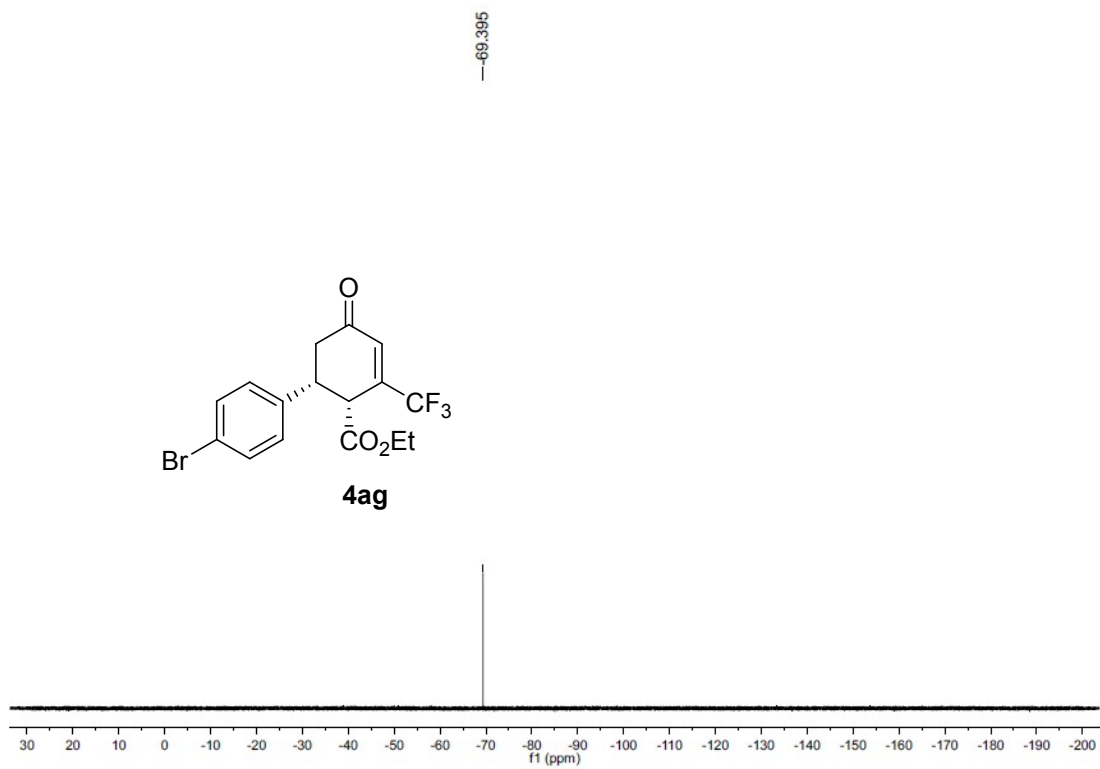

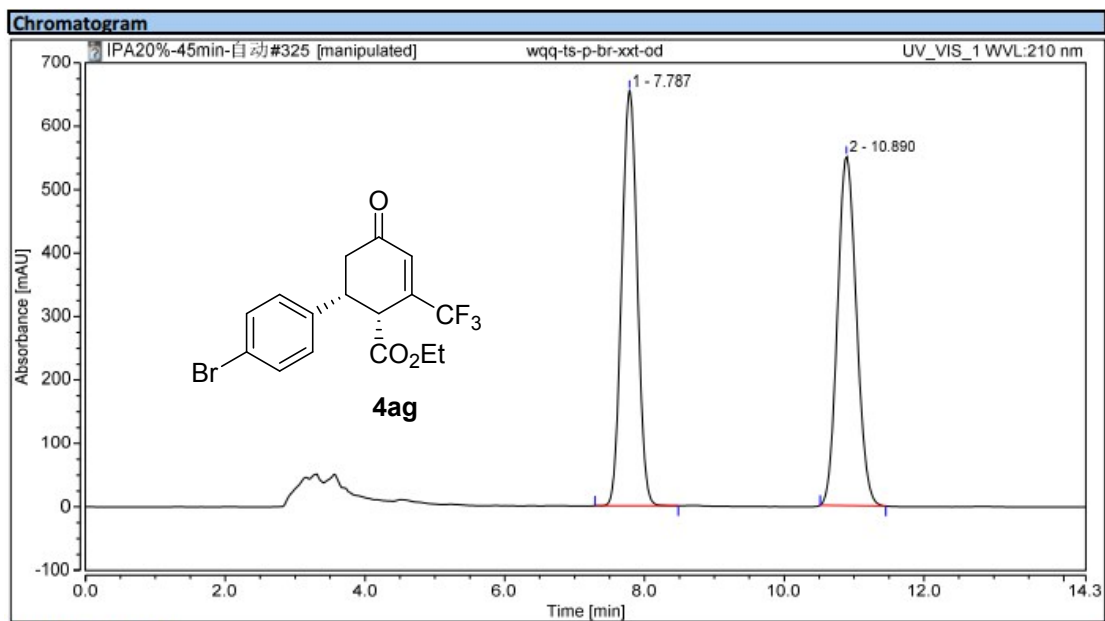

**Integration Results**

| No.           | Peak Name | Retention Time min | Area mAU*min   | Height mAU      | Relative Area % | Relative Height % | Amount |
|---------------|-----------|--------------------|----------------|-----------------|-----------------|-------------------|--------|
| 1             |           | 7.787              | 168.921        | 655.114         | 49.42           | 54.33             | n.a.   |
| 2             |           | 10.890             | 172.858        | 550.599         | 50.58           | 45.67             | n.a.   |
| <b>Total:</b> |           |                    | <b>341.779</b> | <b>1205.713</b> | <b>100.00</b>   | <b>100.00</b>     |        |

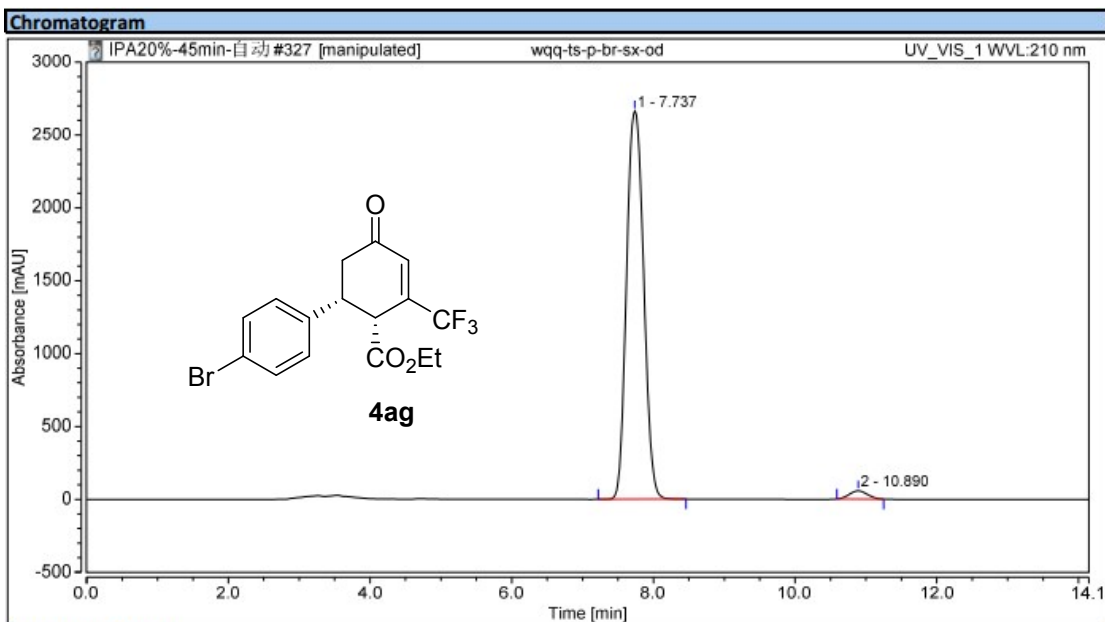

**Integration Results**

| No.           | Peak Name | Retention Time min | Area mAU*min   | Height mAU      | Relative Area % | Relative Height % | Amount |
|---------------|-----------|--------------------|----------------|-----------------|-----------------|-------------------|--------|
| 1             |           | 7.737              | 743.923        | 2665.483        | 97.80           | 97.93             | n.a.   |
| 2             |           | 10.890             | 16.734         | 56.279          | 2.20            | 2.07              | n.a.   |
| <b>Total:</b> |           |                    | <b>760.657</b> | <b>2721.762</b> | <b>100.00</b>   | <b>100.00</b>     |        |



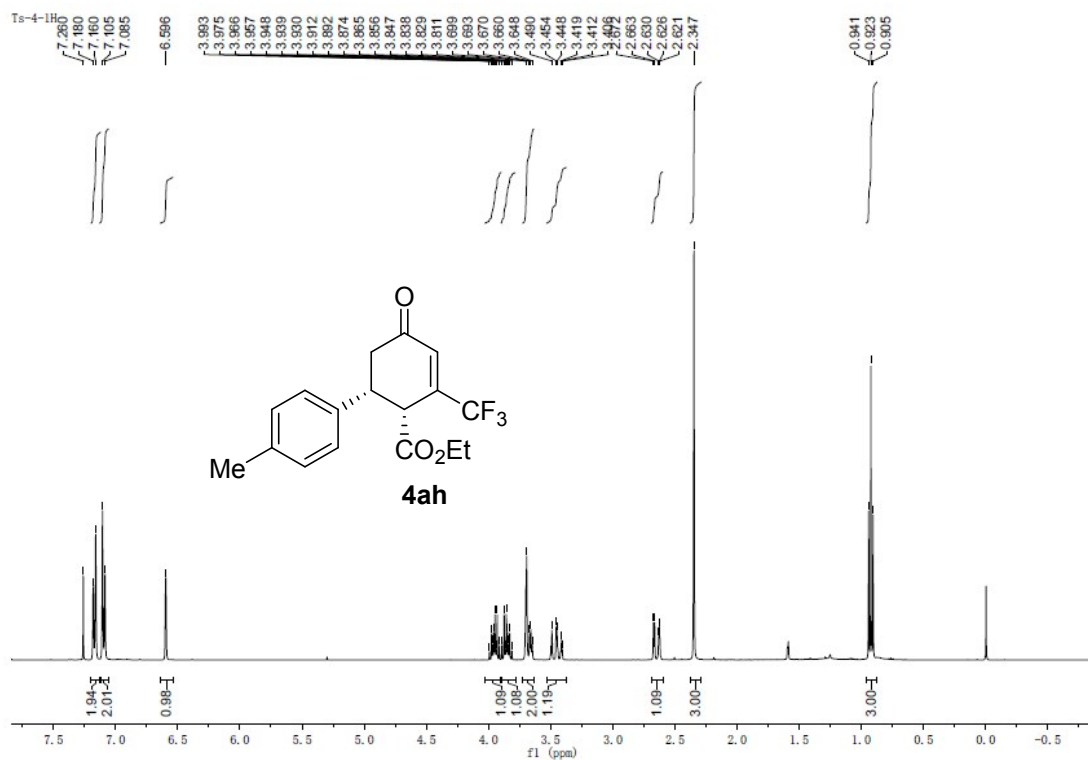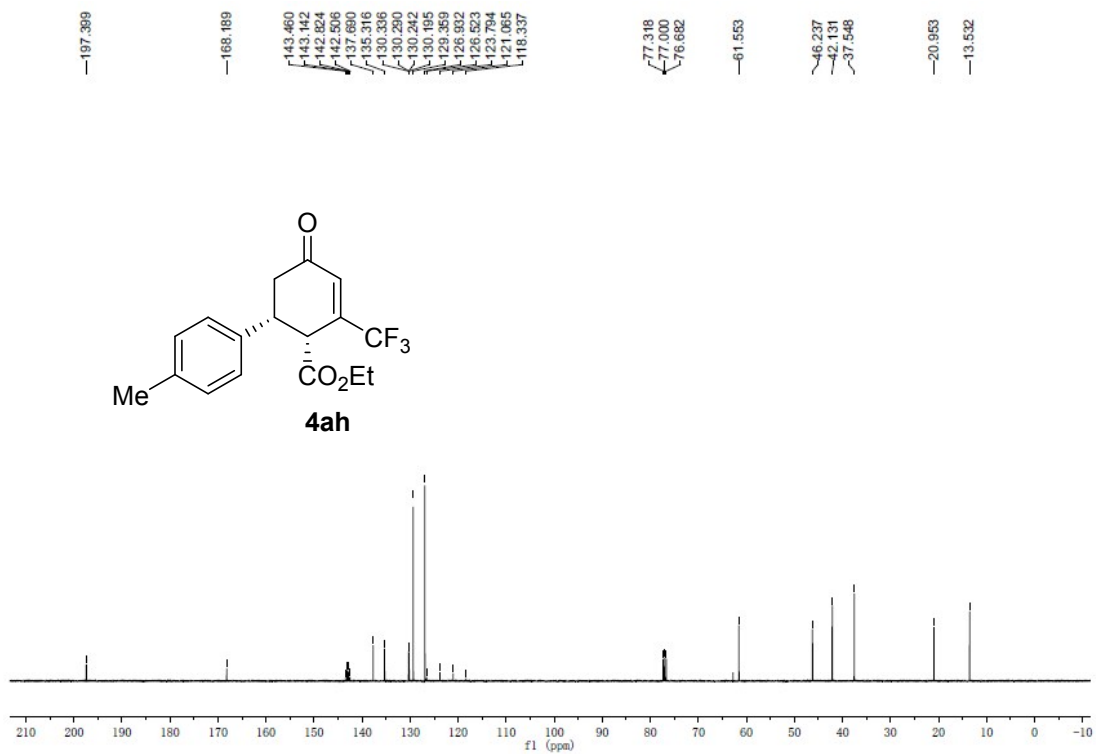

-69.453

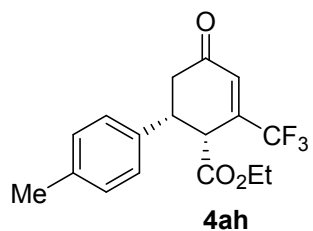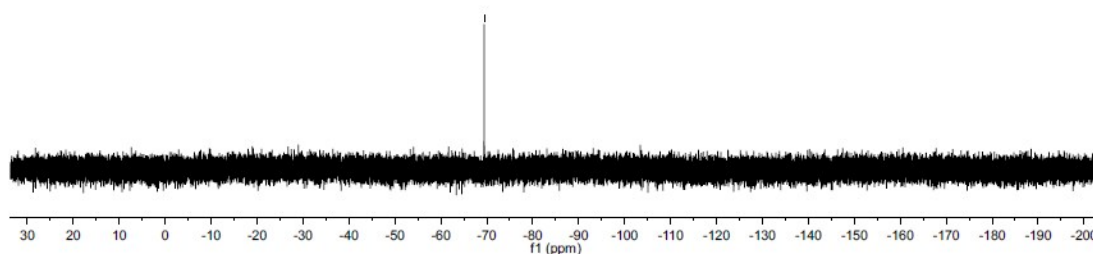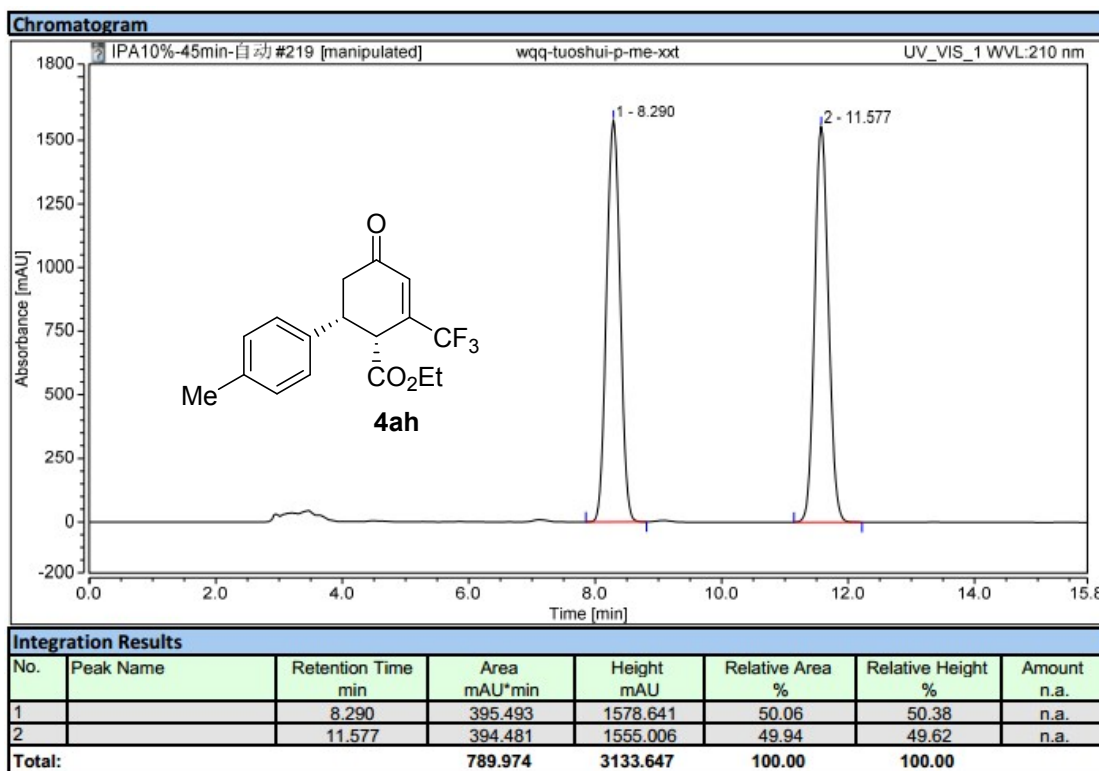

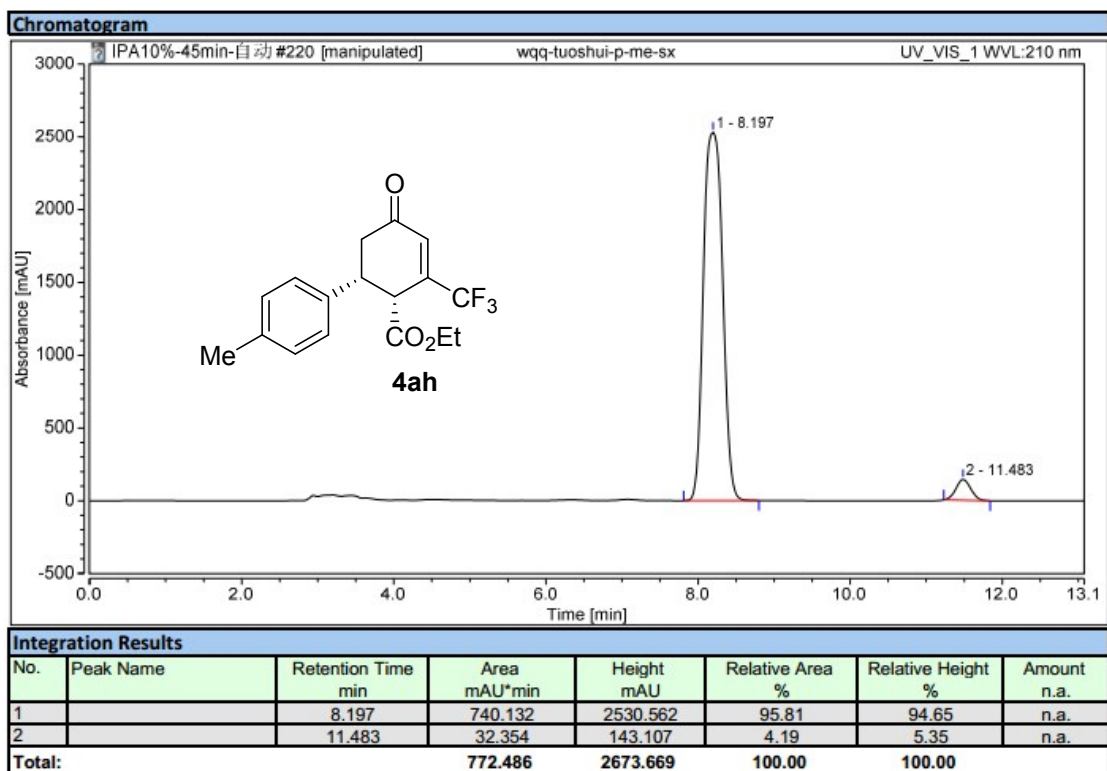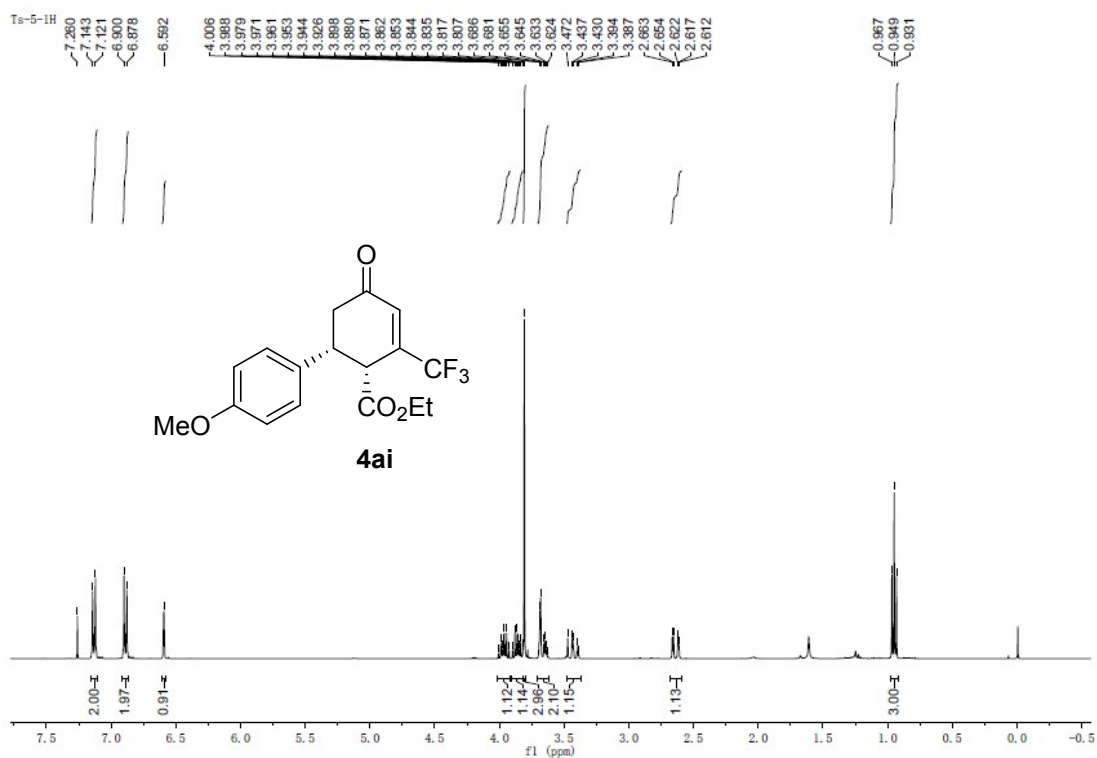

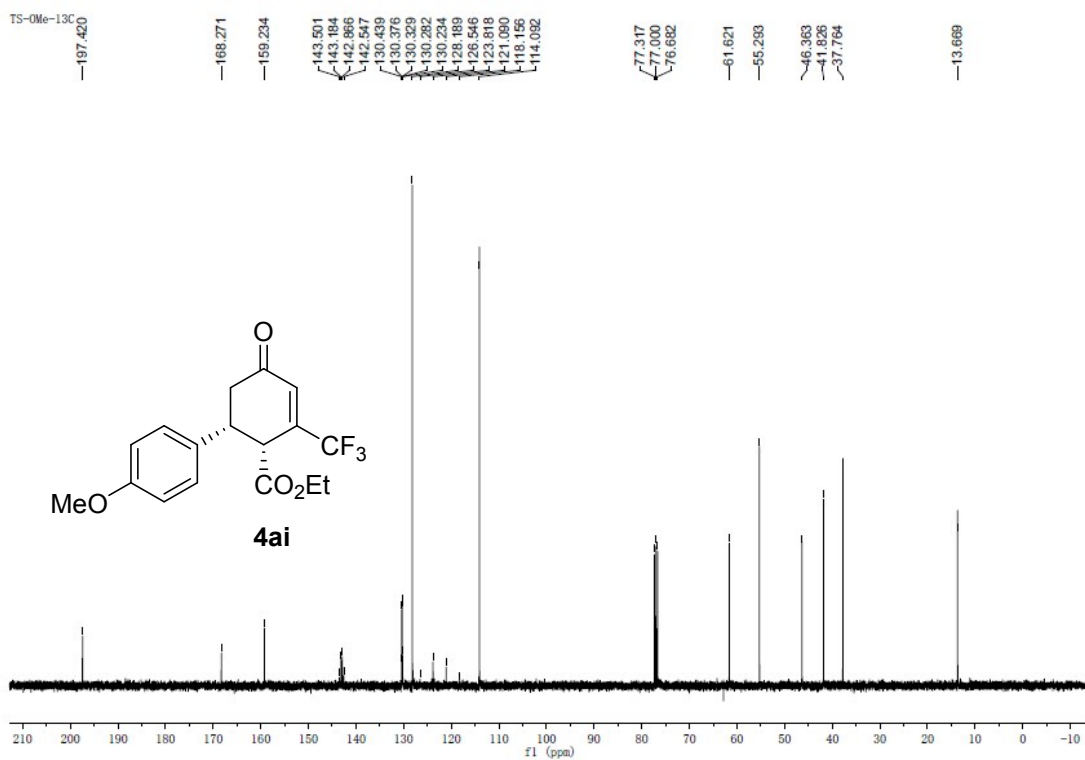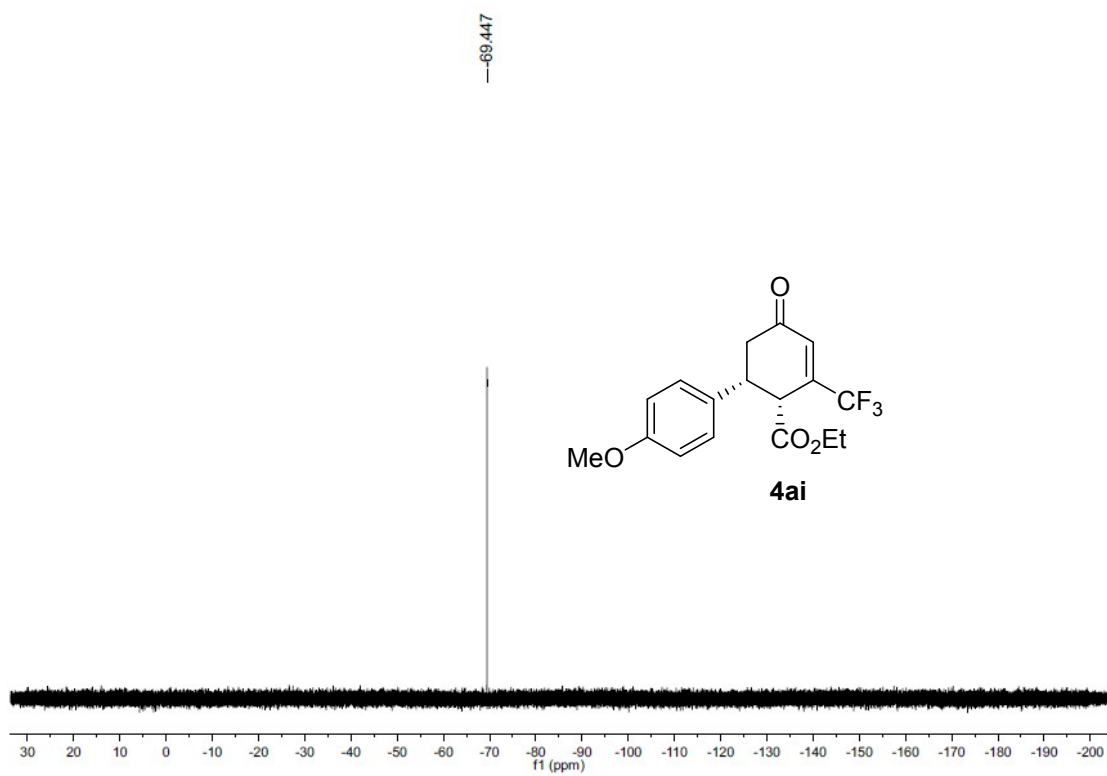

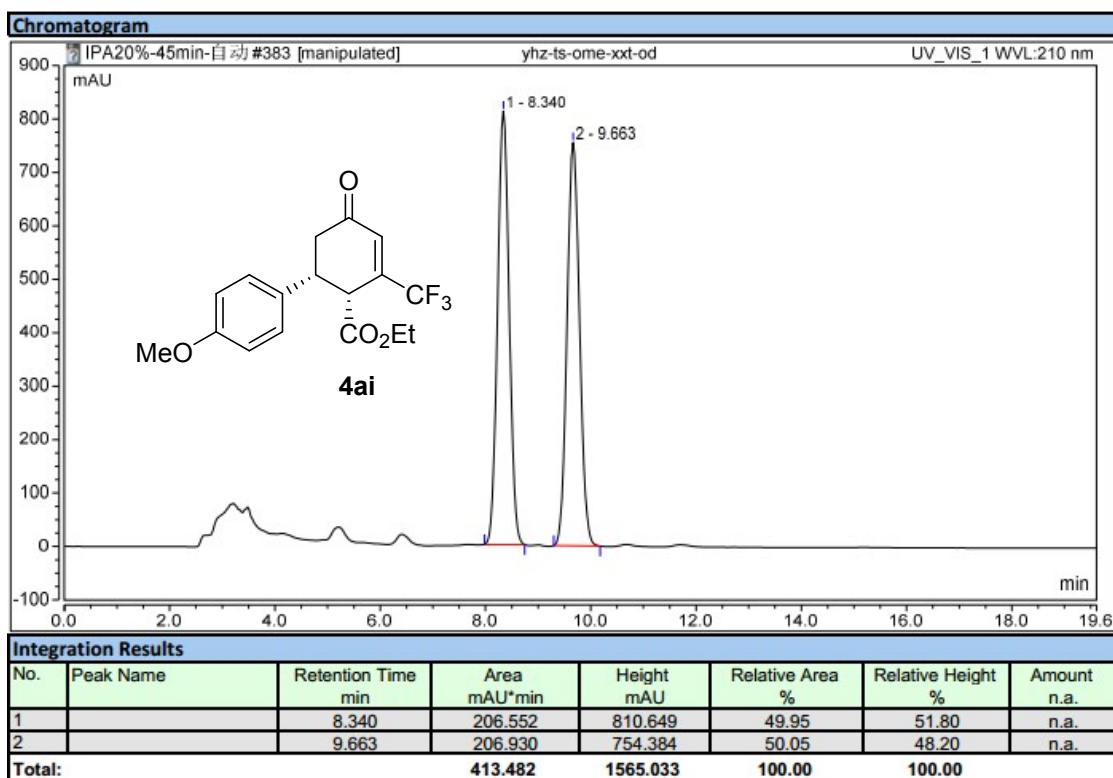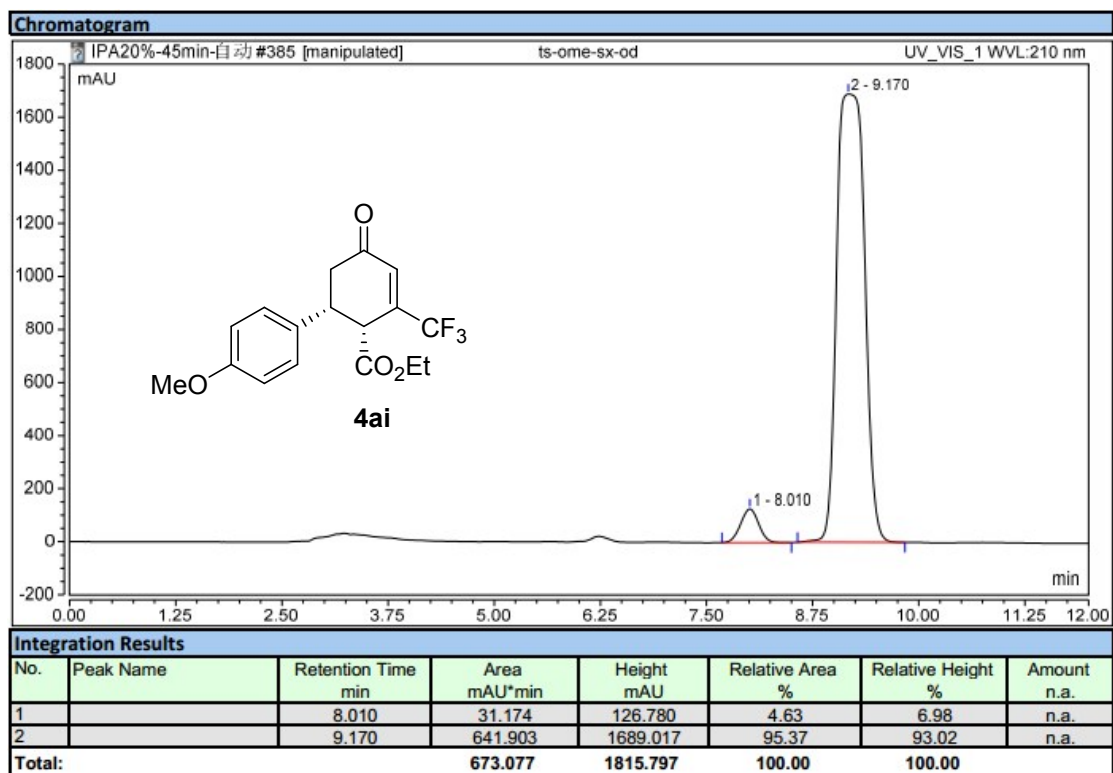

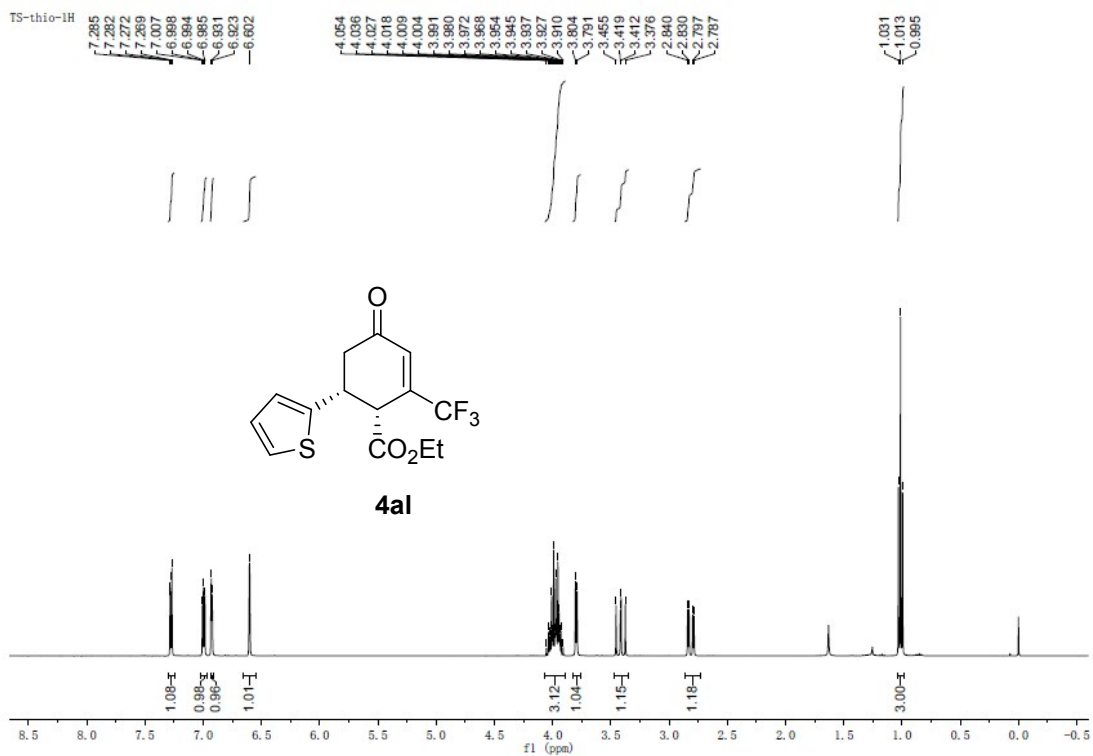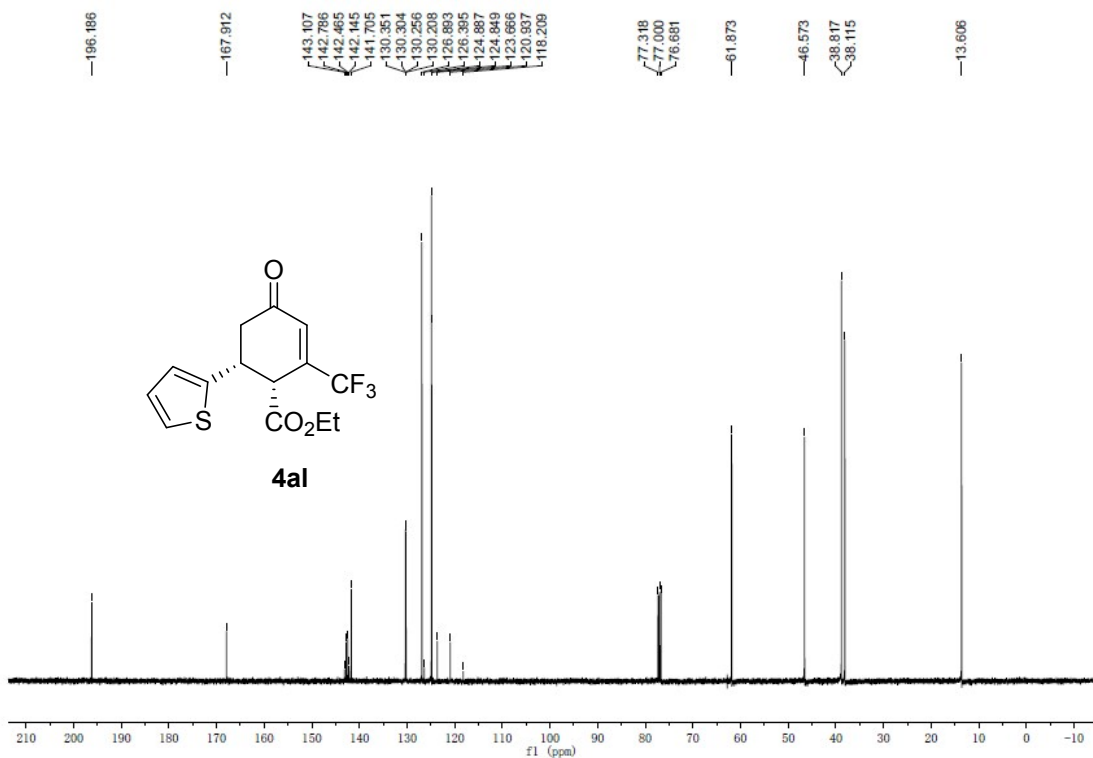

-69.423

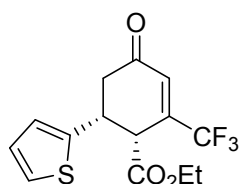

4al

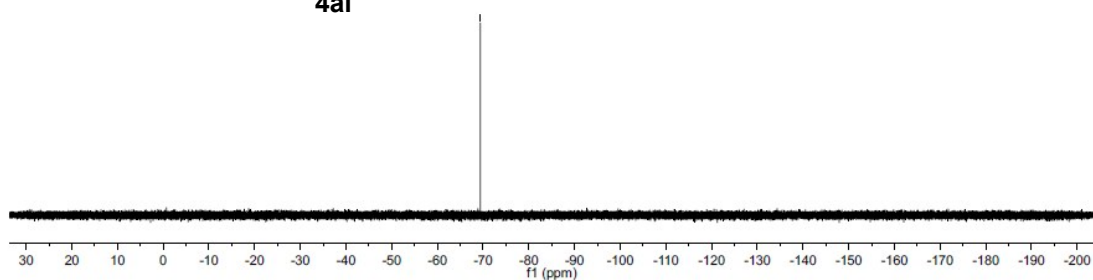

### Chromatogram

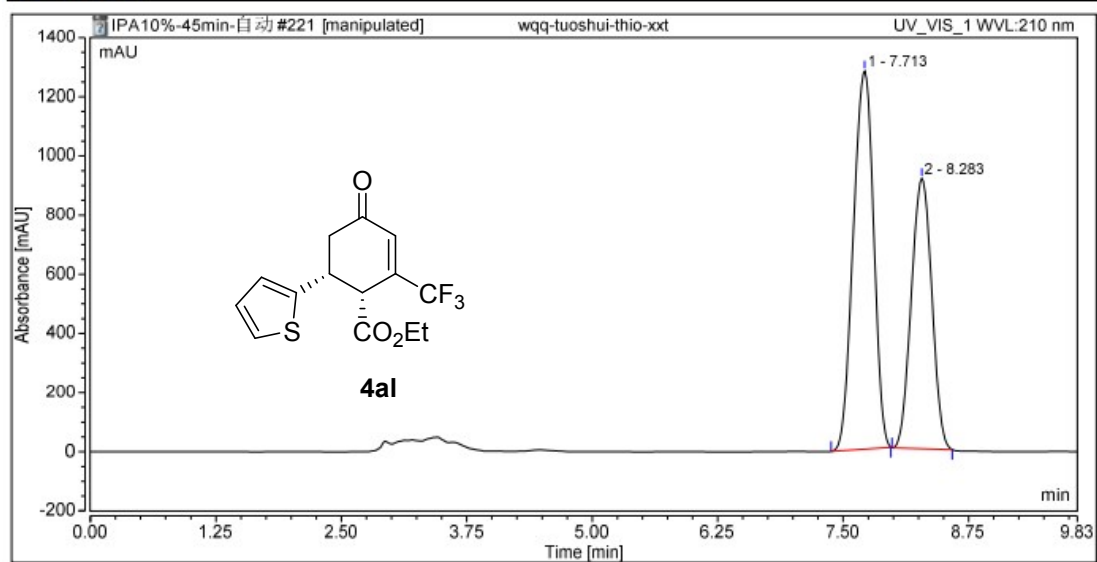

### Integration Results

| No.           | Peak Name | Retention Time<br>min | Area<br>mAU*min | Height<br>mAU   | Relative Area<br>% | Relative Height<br>% | Amount<br>n.a. |
|---------------|-----------|-----------------------|-----------------|-----------------|--------------------|----------------------|----------------|
| 1             |           | 7.713                 | 298.710         | 1278.968        | 58.09              | 58.32                | n.a.           |
| 2             |           | 8.283                 | 215.483         | 913.905         | 41.91              | 41.68                | n.a.           |
| <b>Total:</b> |           |                       | <b>514.193</b>  | <b>2192.873</b> | <b>100.00</b>      | <b>100.00</b>        |                |

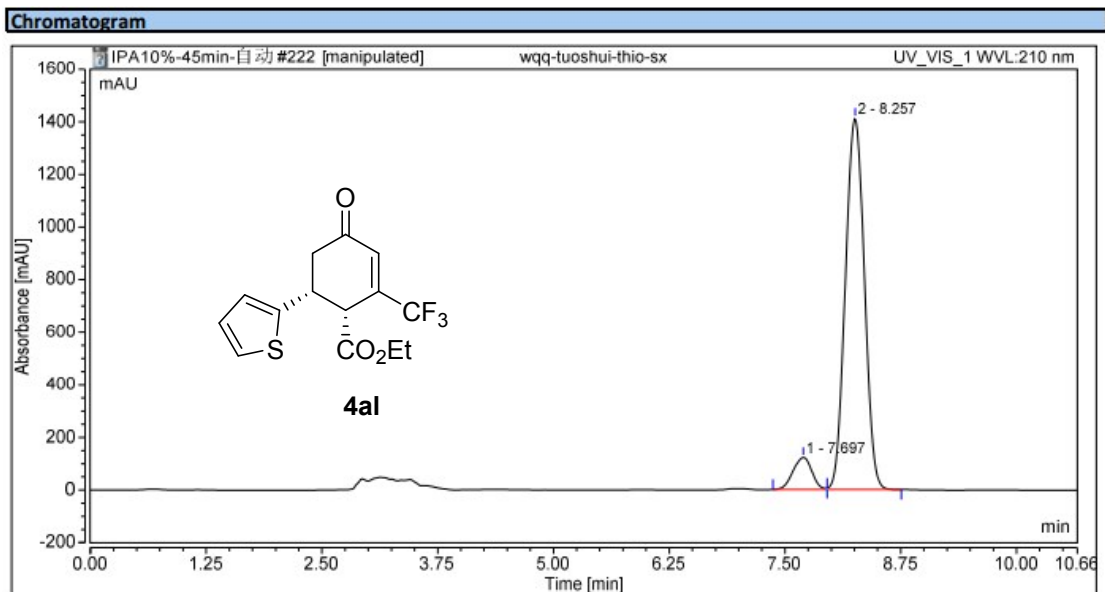

**Integration Results**

| No.           | Peak Name | Retention Time min | Area mAU*min   | Height mAU      | Relative Area % | Relative Height % | Amount n.a. |
|---------------|-----------|--------------------|----------------|-----------------|-----------------|-------------------|-------------|
| 1             |           | 7.697              | 28.705         | 122.029         | 7.88            | 7.96              | n.a.        |
| 2             |           | 8.257              | 335.510        | 1411.506        | 92.12           | 92.04             | n.a.        |
| <b>Total:</b> |           |                    | <b>364.215</b> | <b>1533.534</b> | <b>100.00</b>   | <b>100.00</b>     |             |

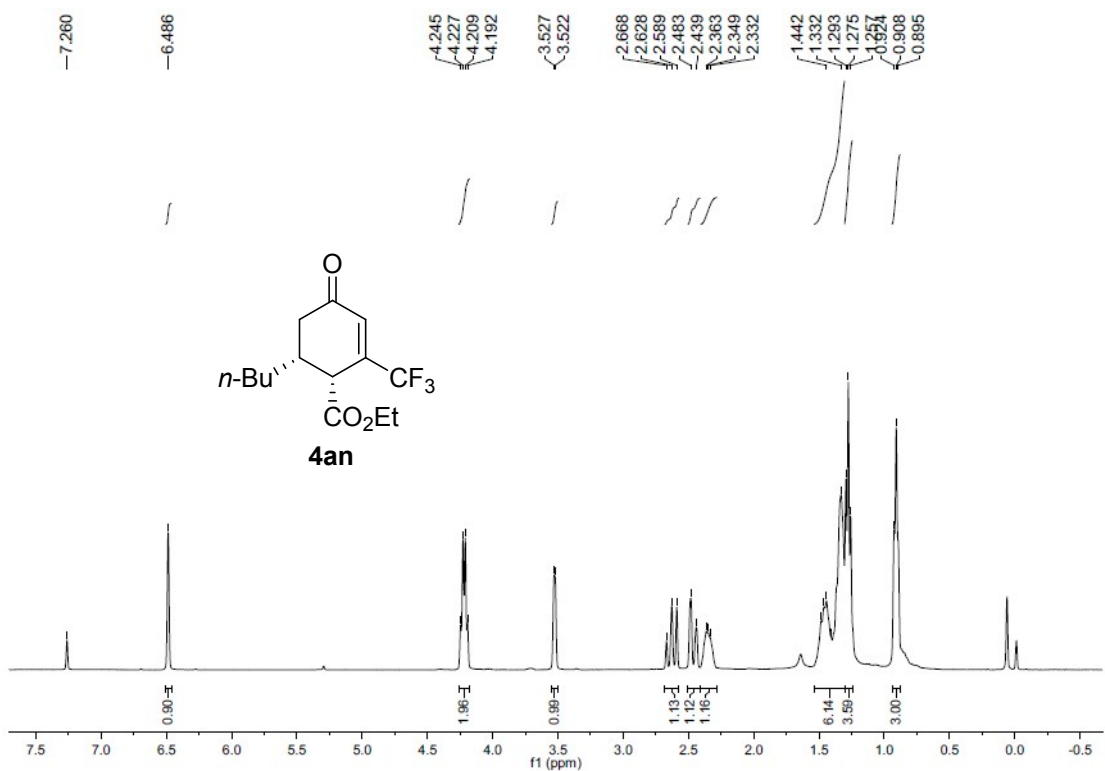



—197.681  
 —166.459  
 144.060  
 143.738  
 143.422  
 143.108  
 130.294  
 130.244  
 130.193  
 130.139  
 126.594  
 123.864  
 121.136  
 118.398  
 77.320  
 77.000  
 76.682  
 —61.796  
 43.238  
 39.370  
 37.745  
 32.899  
 28.518  
 22.476  
 14.076  
 13.849

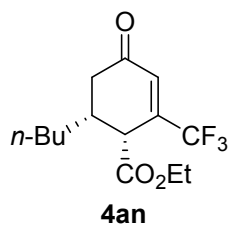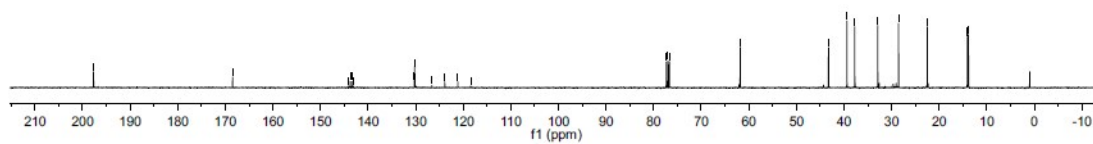

—69.804

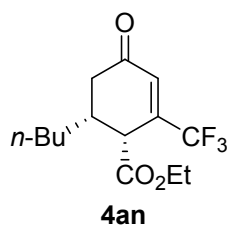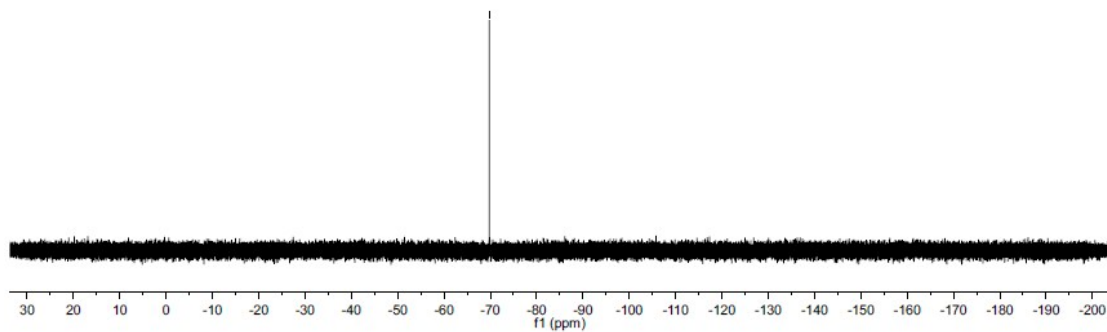

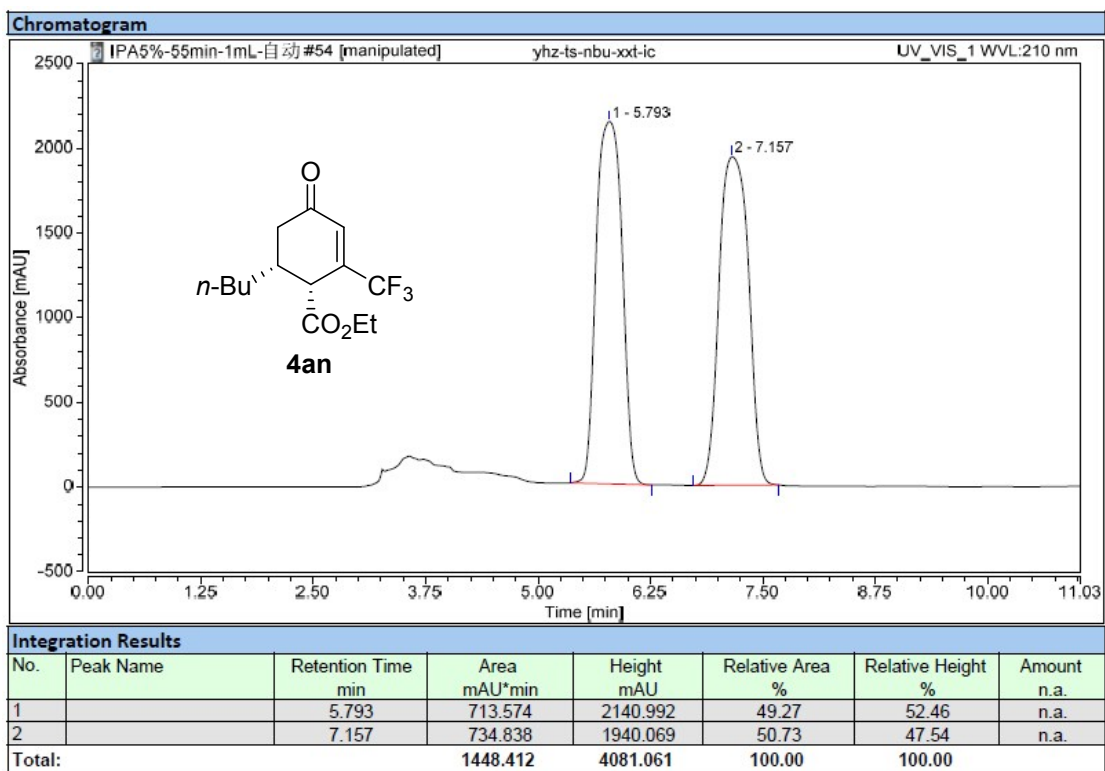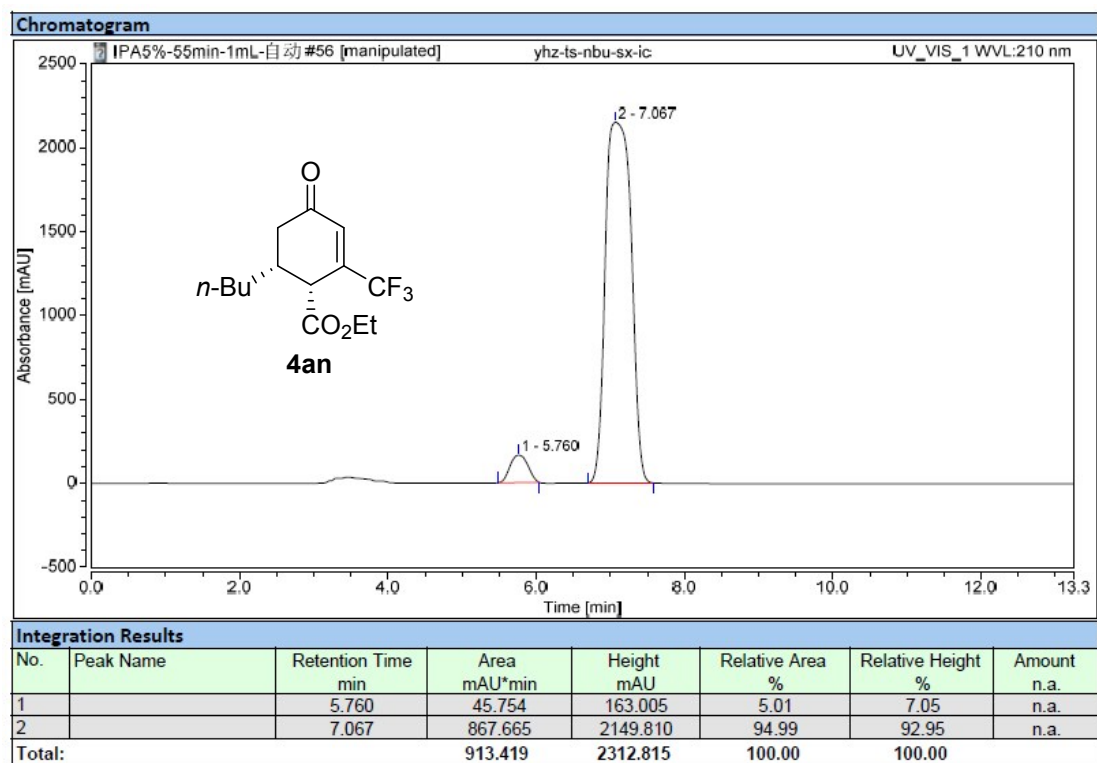

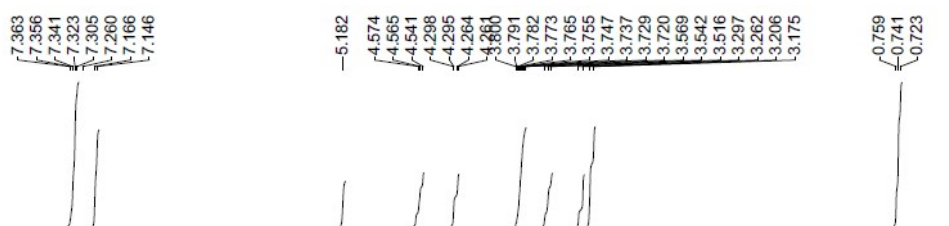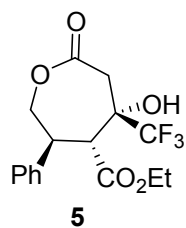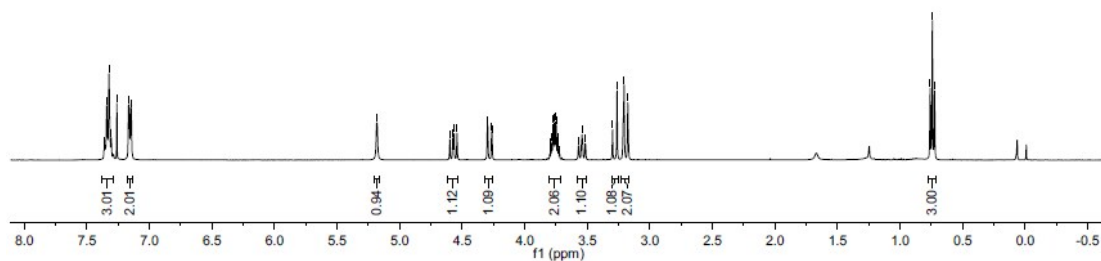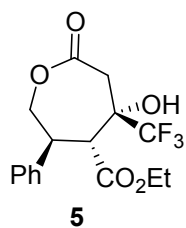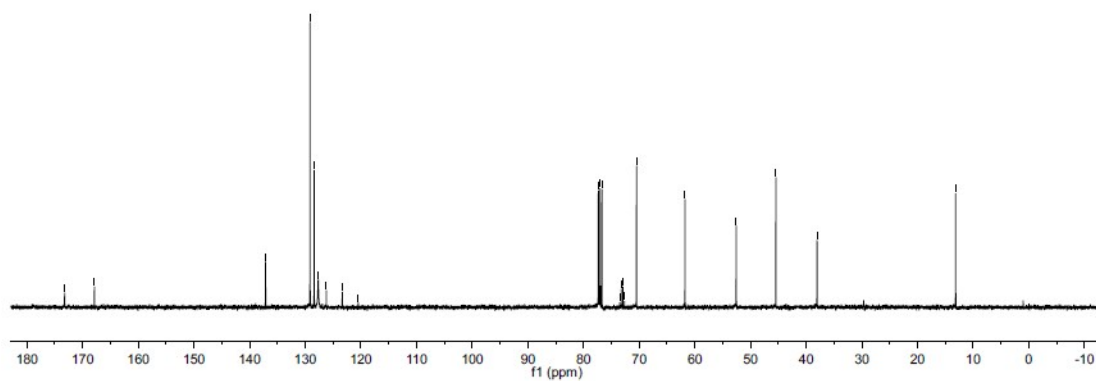

-80.732

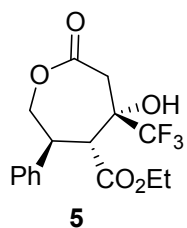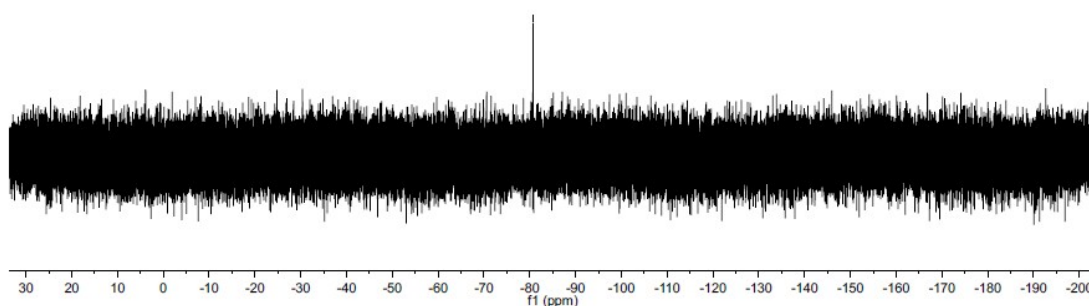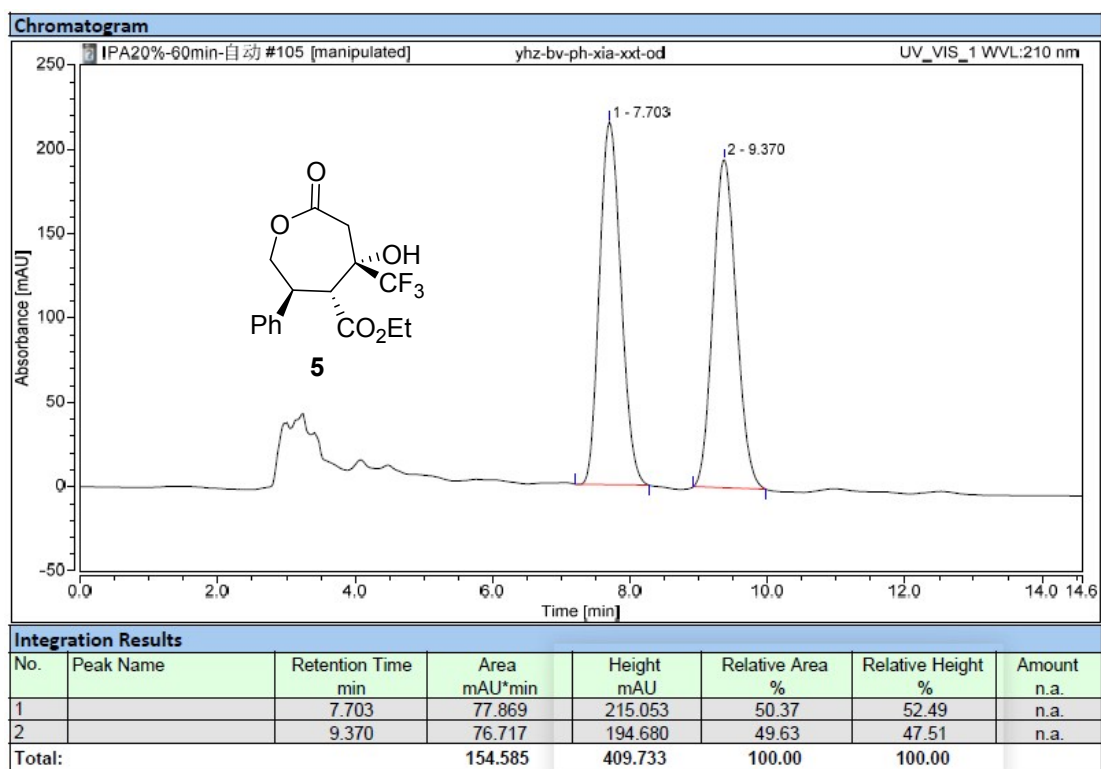

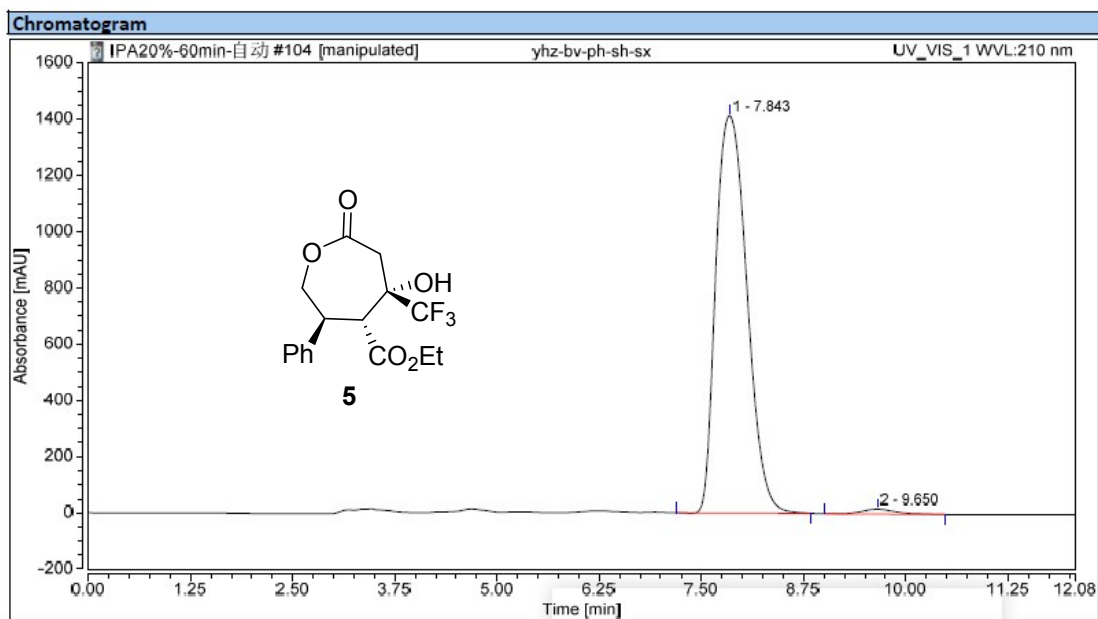

**Integration Results**

| No.           | Peak Name | Retention Time<br>min | Area<br>mAU*min | Height<br>mAU   | Relative Area<br>% | Relative Height<br>% | Amount |
|---------------|-----------|-----------------------|-----------------|-----------------|--------------------|----------------------|--------|
| 1             |           | 7.843                 | 623.625         | 1414.008        | 98.70              | 98.79                | n.a.   |
| 2             |           | 9.650                 | 8.216           | 17.369          | 1.30               | 1.21                 | n.a.   |
| <b>Total:</b> |           |                       | <b>631.841</b>  | <b>1431.377</b> | <b>100.00</b>      | <b>100.00</b>        |        |

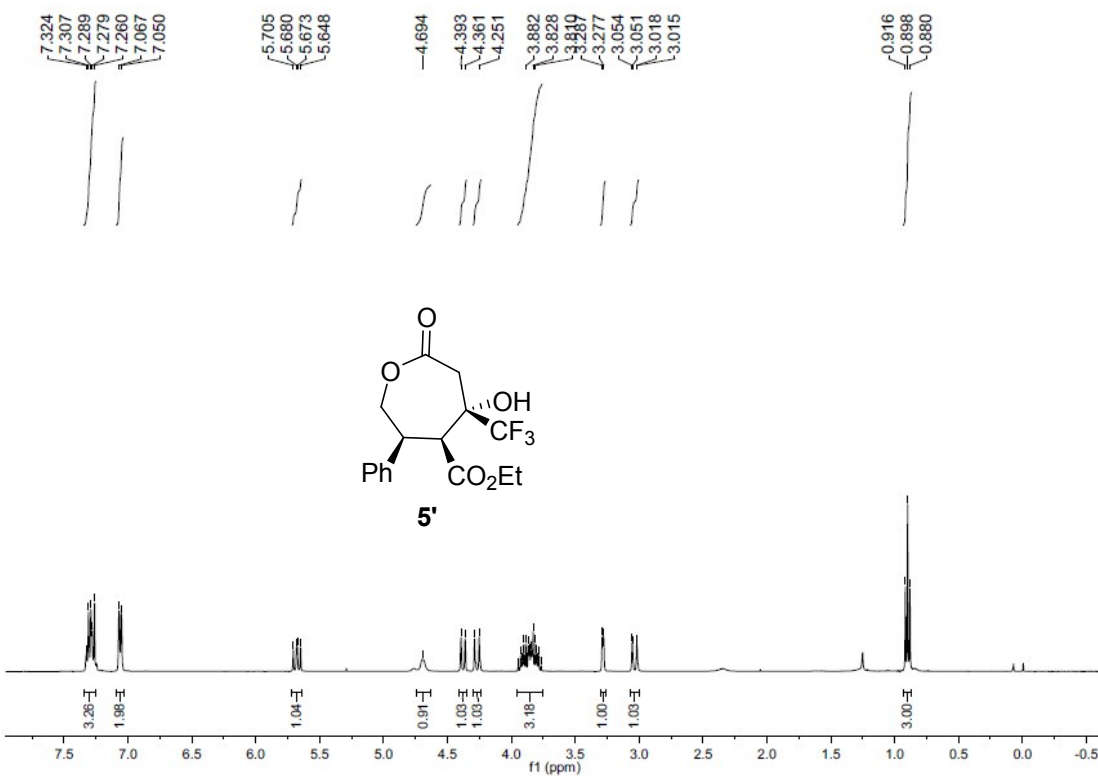

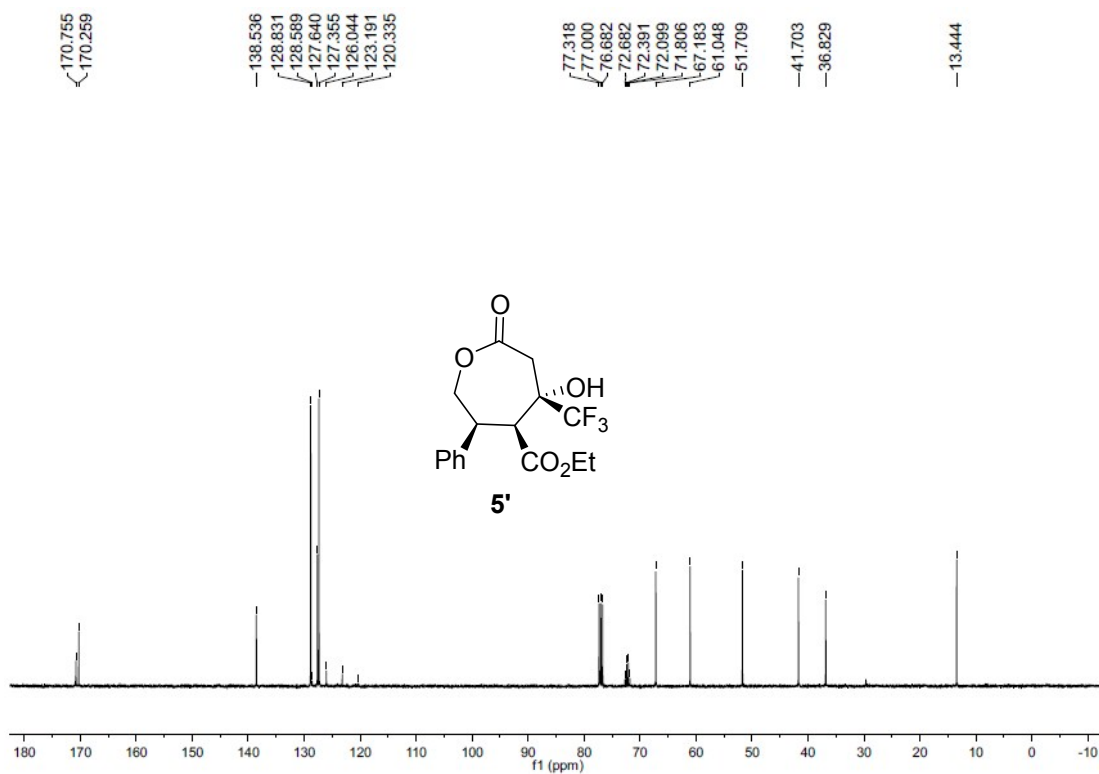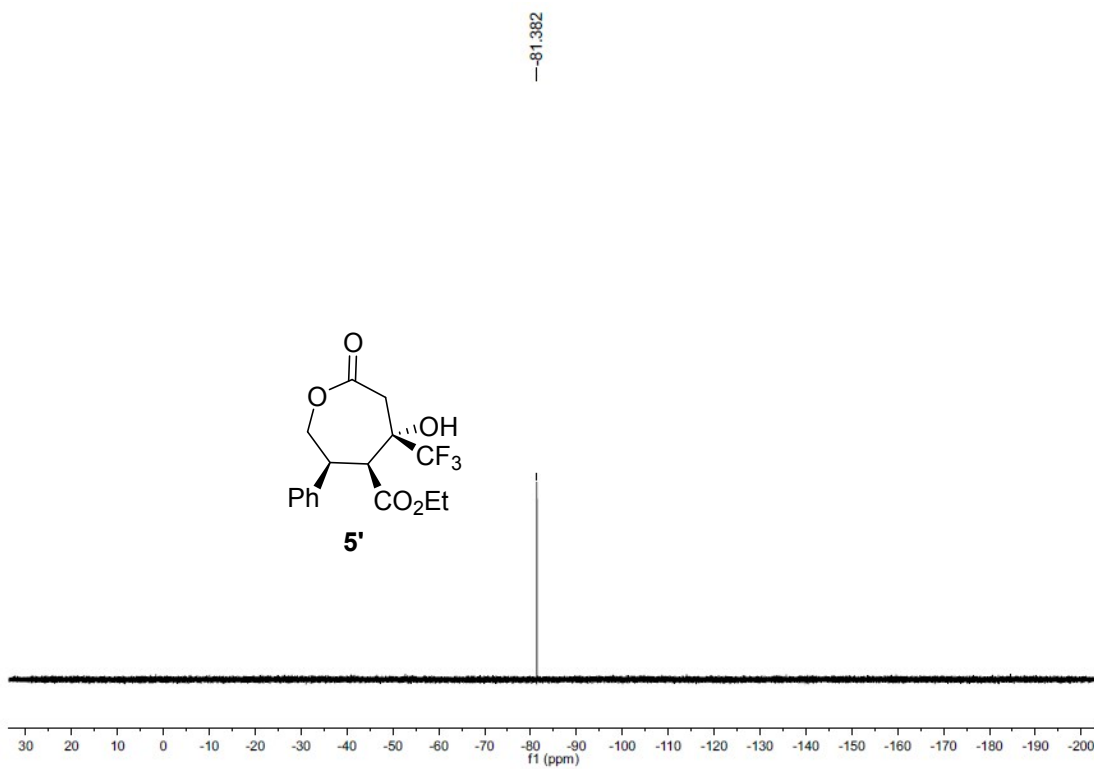

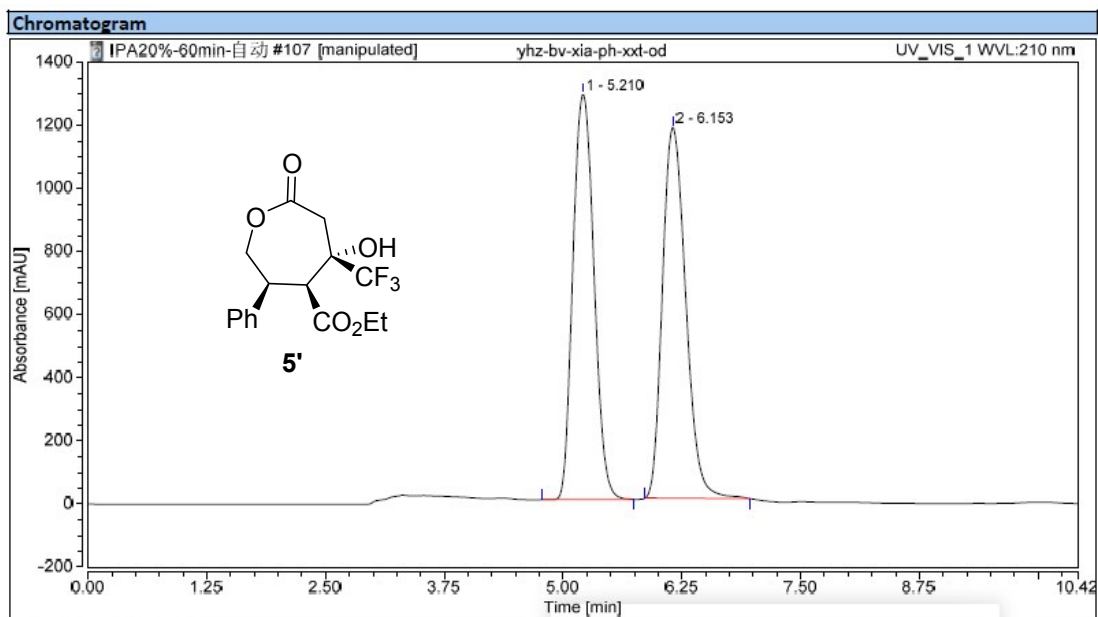

**Integration Results**

| No.    | Peak Name | Retention Time<br>min | Area<br>mAU*min | Height<br>mAU | Relative Area<br>% | Relative Height<br>% | Amount |
|--------|-----------|-----------------------|-----------------|---------------|--------------------|----------------------|--------|
| 1      |           | 5.210                 | 329.379         | 1286.781      | 49.64              | 52.23                | n.a.   |
| 2      |           | 6.153                 | 334.159         | 1176.688      | 50.36              | 47.77                | n.a.   |
| Total: |           |                       | 663.538         | 2463.469      | 100.00             | 100.00               |        |

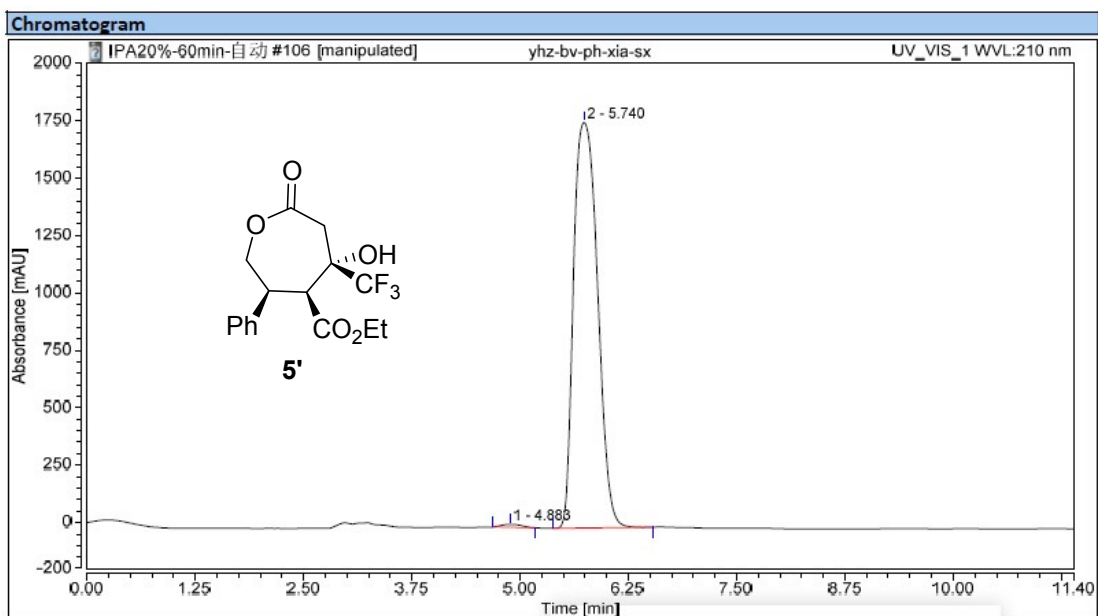

**Integration Results**

| No.    | Peak Name | Retention Time<br>min | Area<br>mAU*min | Height<br>mAU | Relative Area<br>% | Relative Height<br>% | Amount |
|--------|-----------|-----------------------|-----------------|---------------|--------------------|----------------------|--------|
| 1      |           | 4.883                 | 3.435           | 12.995        | 0.60               | 0.73                 | n.a.   |
| 2      |           | 5.740                 | 565.251         | 1766.699      | 99.40              | 99.27                | n.a.   |
| Total: |           |                       | 568.686         | 1779.694      | 100.00             | 100.00               |        |

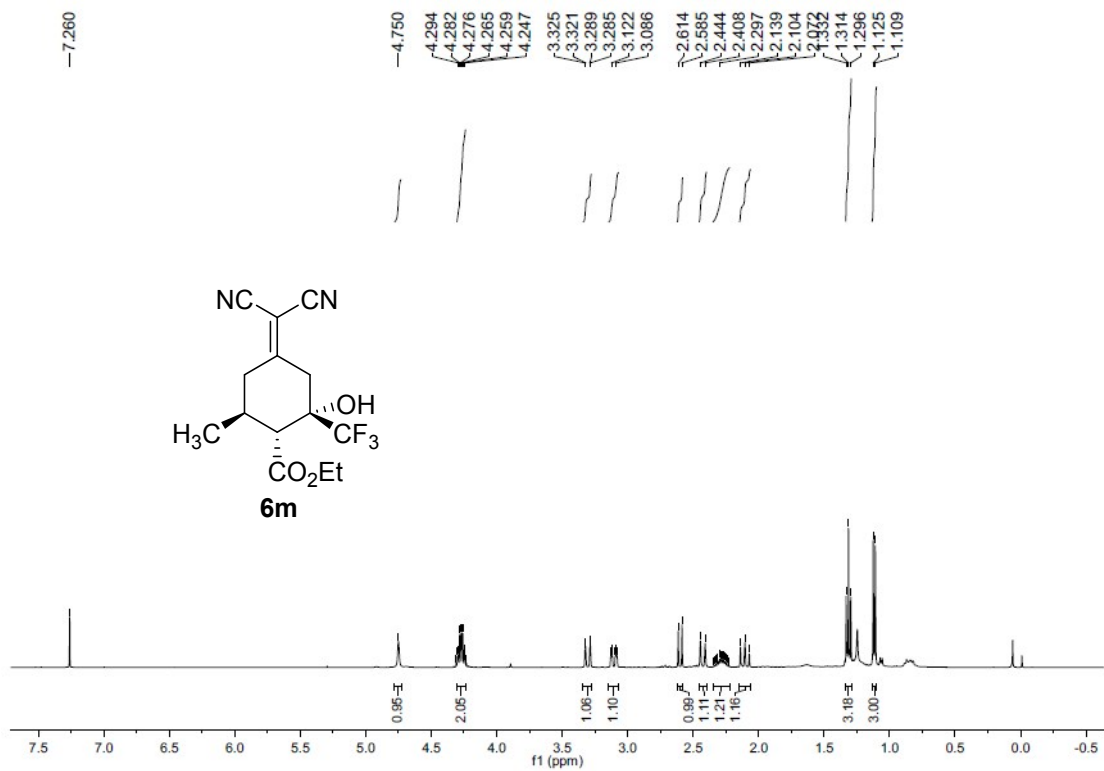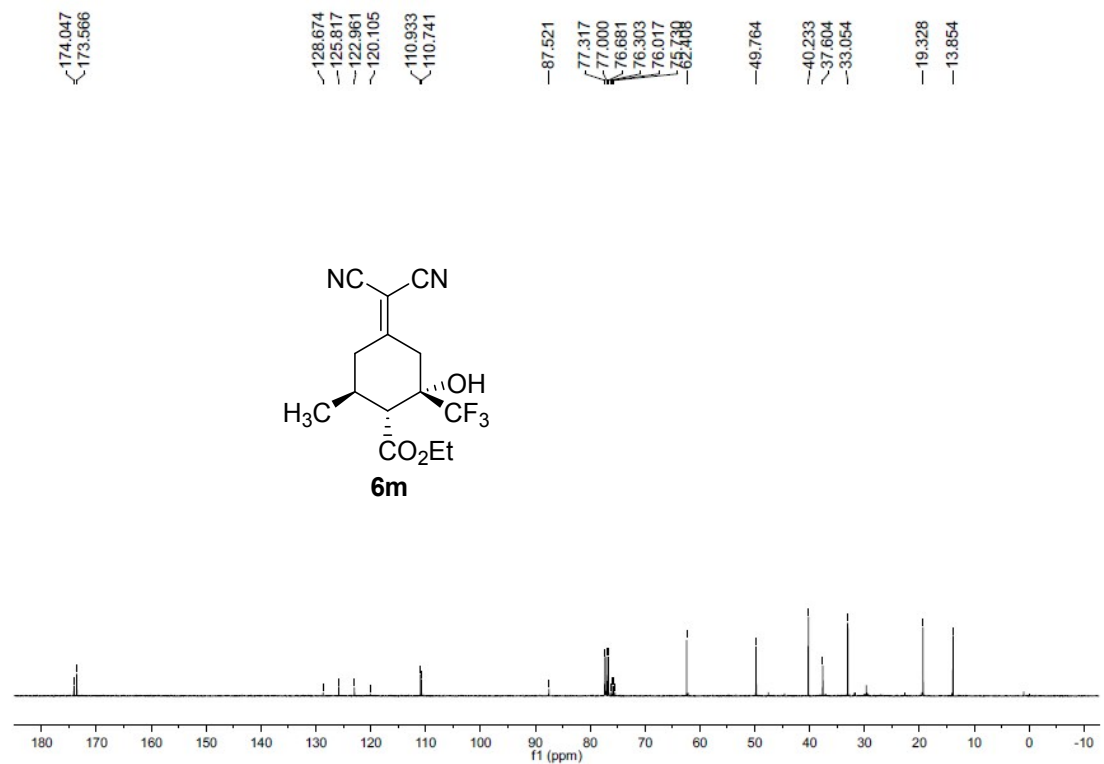



-81.344

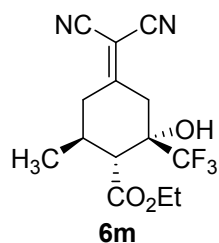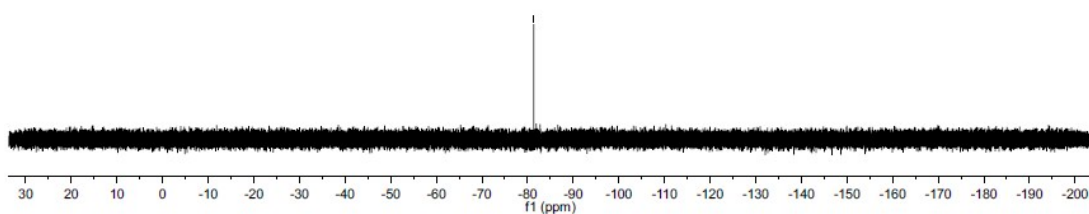

### Chromatogram

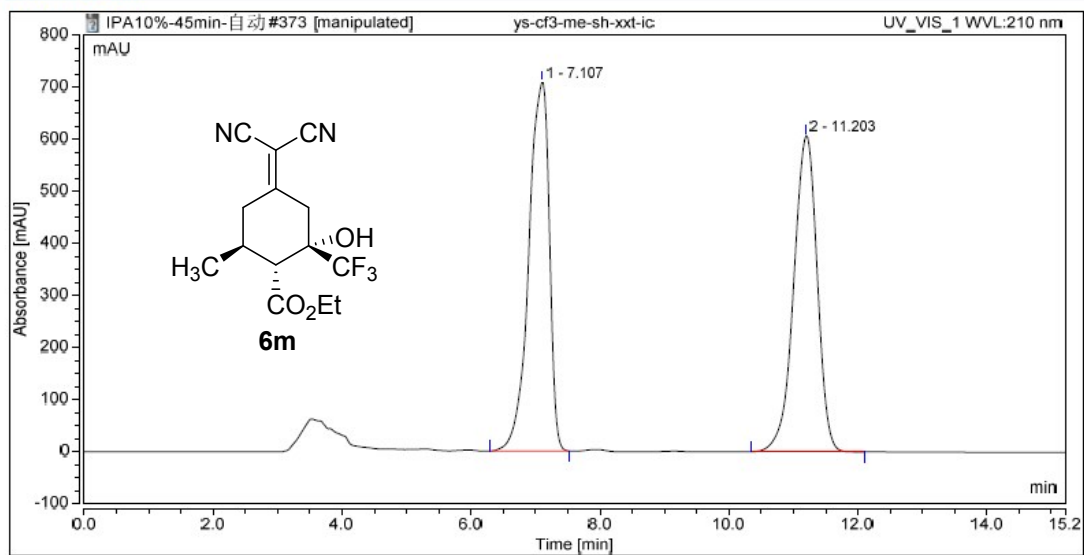

### Integration Results

| No.    | Peak Name | Retention Time<br>min | Area<br>mAU*min | Height<br>mAU | Relative Area<br>% | Relative Height<br>% | Amount |
|--------|-----------|-----------------------|-----------------|---------------|--------------------|----------------------|--------|
| 1      |           | 7.107                 | 261.656         | 708.954       | 50.49              | 53.84                | n.a.   |
| 2      |           | 11.203                | 256.619         | 607.863       | 49.51              | 46.16                | n.a.   |
| Total: |           |                       | 518.276         | 1316.817      | 100.00             | 100.00               |        |

**Chromatogram**

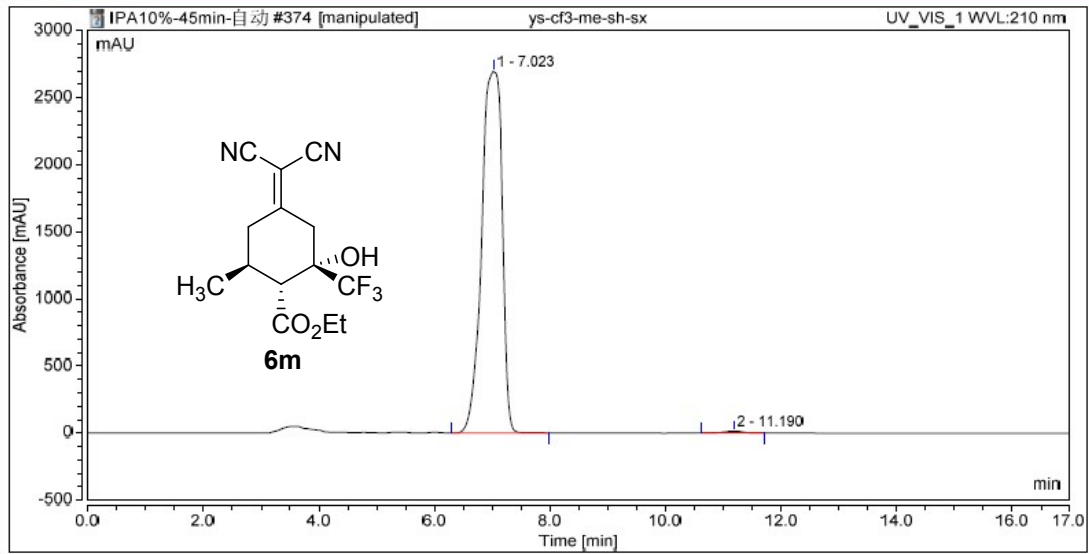

**Integration Results**

| No.           | Peak Name | Retention Time<br>min | Area<br>mAU*min | Height<br>mAU   | Relative Area<br>% | Relative Height<br>% | Amount |
|---------------|-----------|-----------------------|-----------------|-----------------|--------------------|----------------------|--------|
| 1             |           | 7.023                 | 1107.417        | 2698.715        | 99.45              | 99.40                | n.a.   |
| 2             |           | 11.190                | 6.161           | 16.168          | 0.55               | 0.60                 | n.a.   |
| <b>Total:</b> |           |                       | <b>1113.577</b> | <b>2714.883</b> | <b>100.00</b>      | <b>100.00</b>        |        |

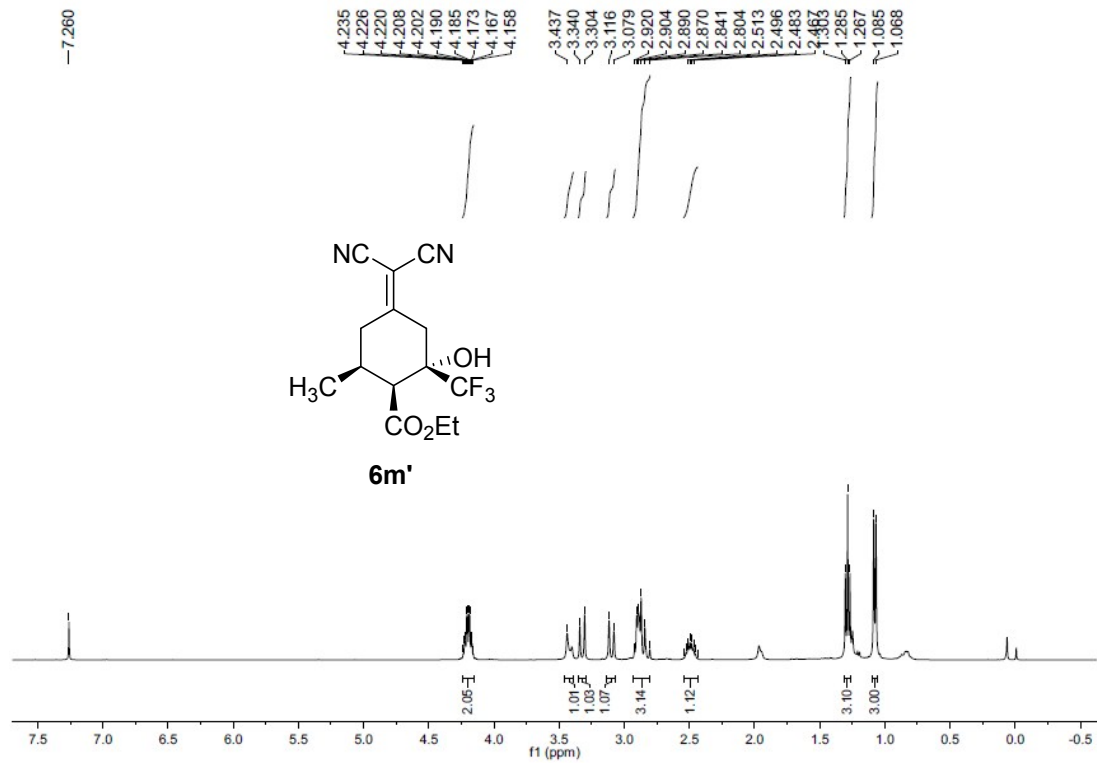

—178.711  
—169.998

128.611  
125.769  
122.927  
120.085  
111.187  
111.022

—86.214  
77.318  
77.000  
76.683  
75.845  
75.550  
69.754

—48.575

—36.500  
—35.362  
—30.352

—18.062  
—13.985

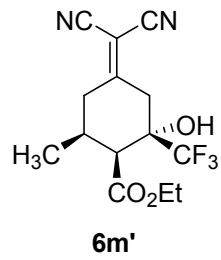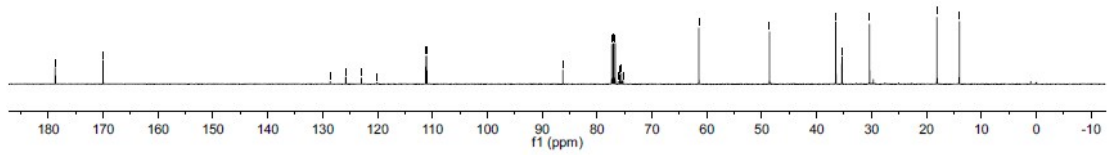

—81.342

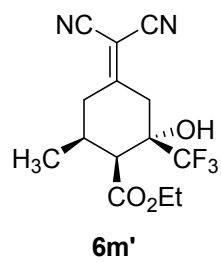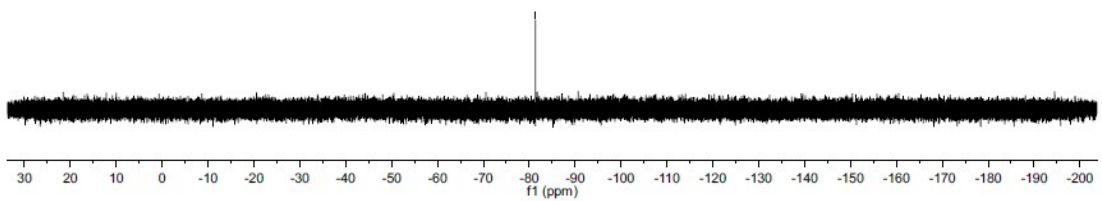

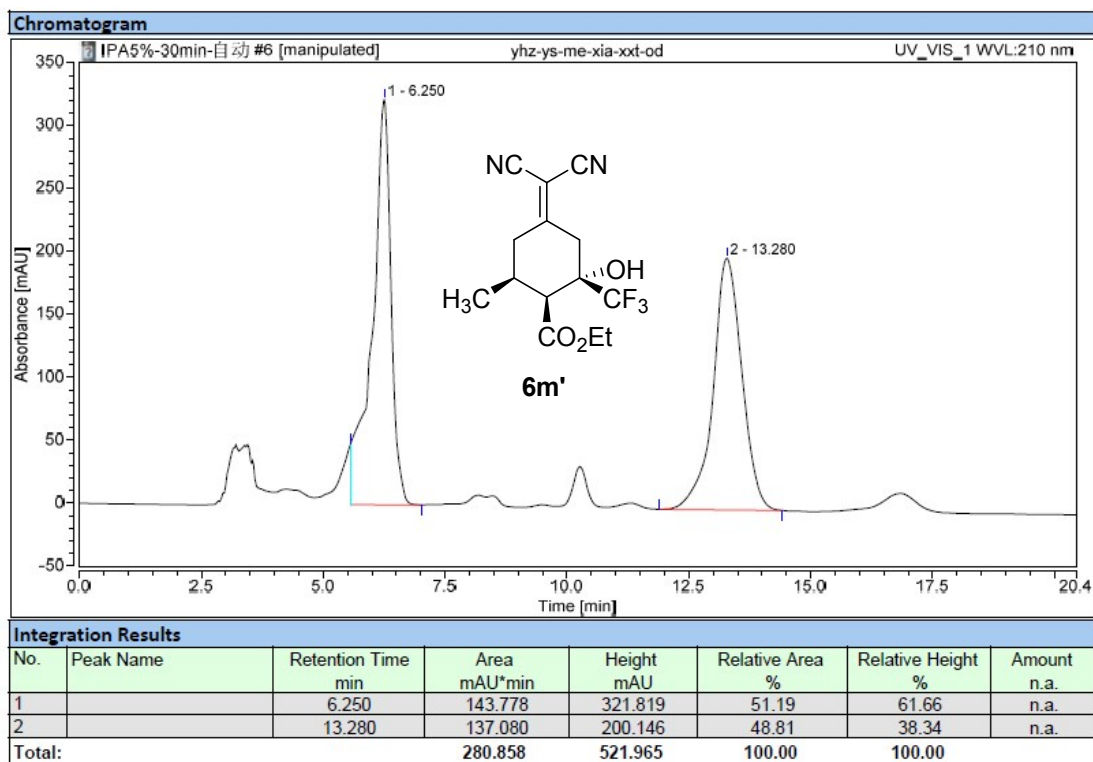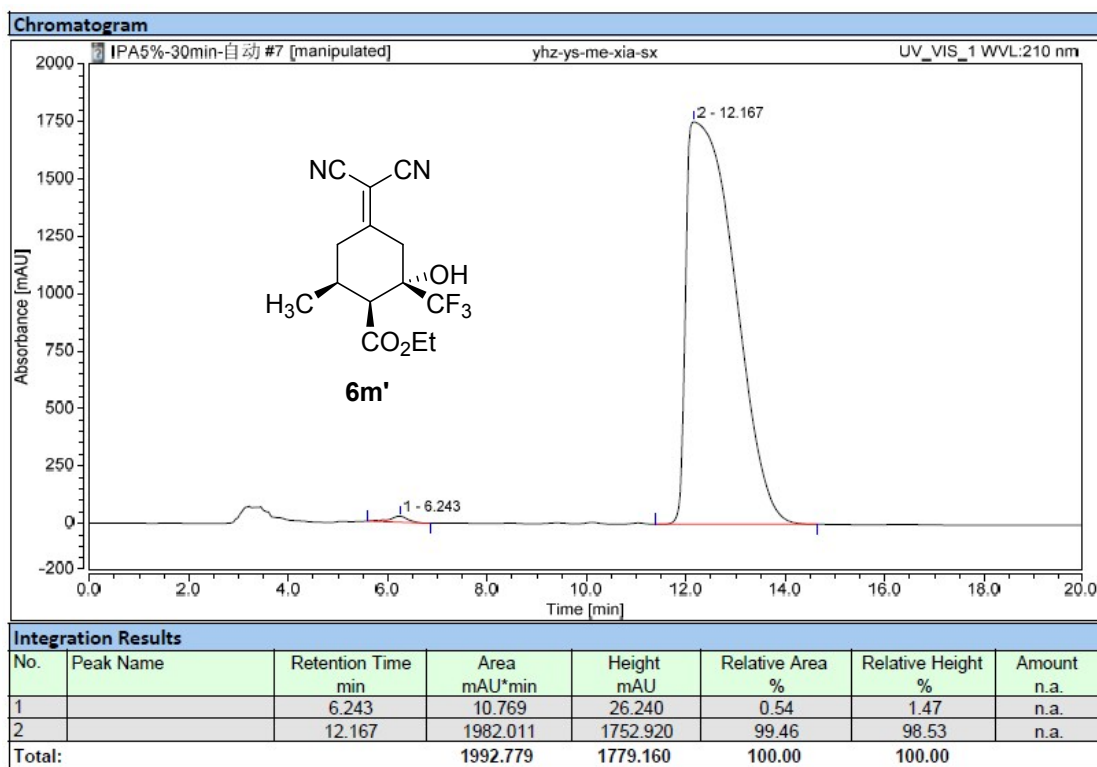

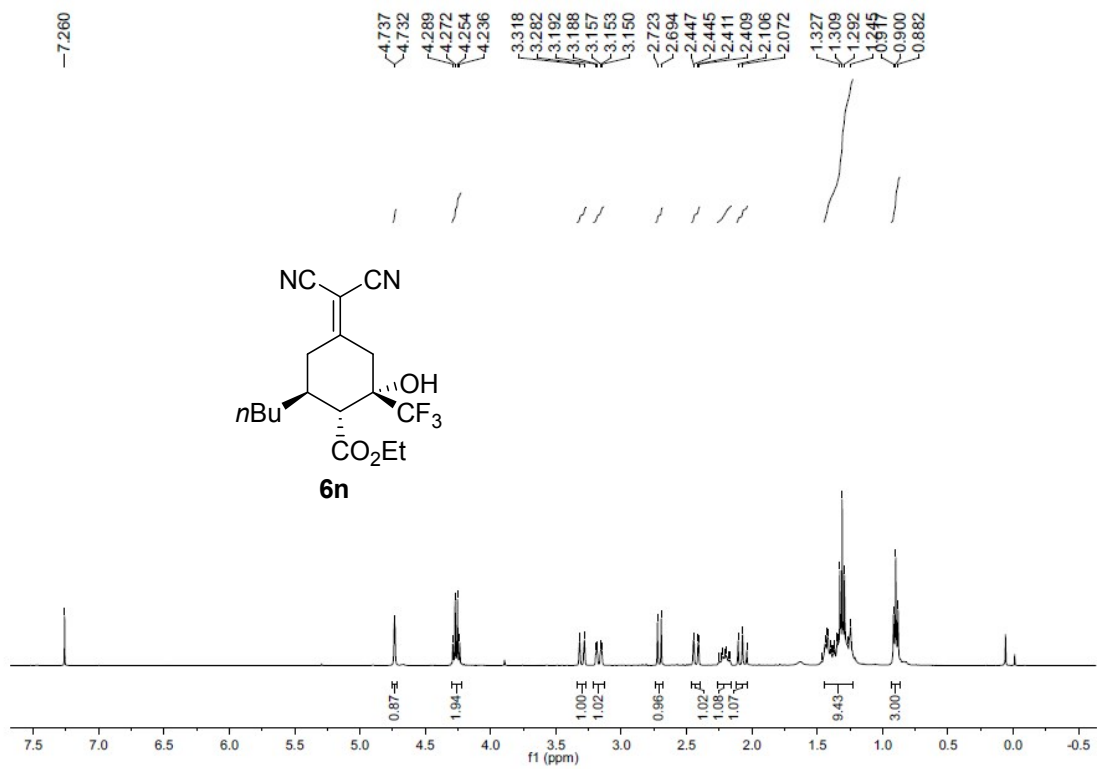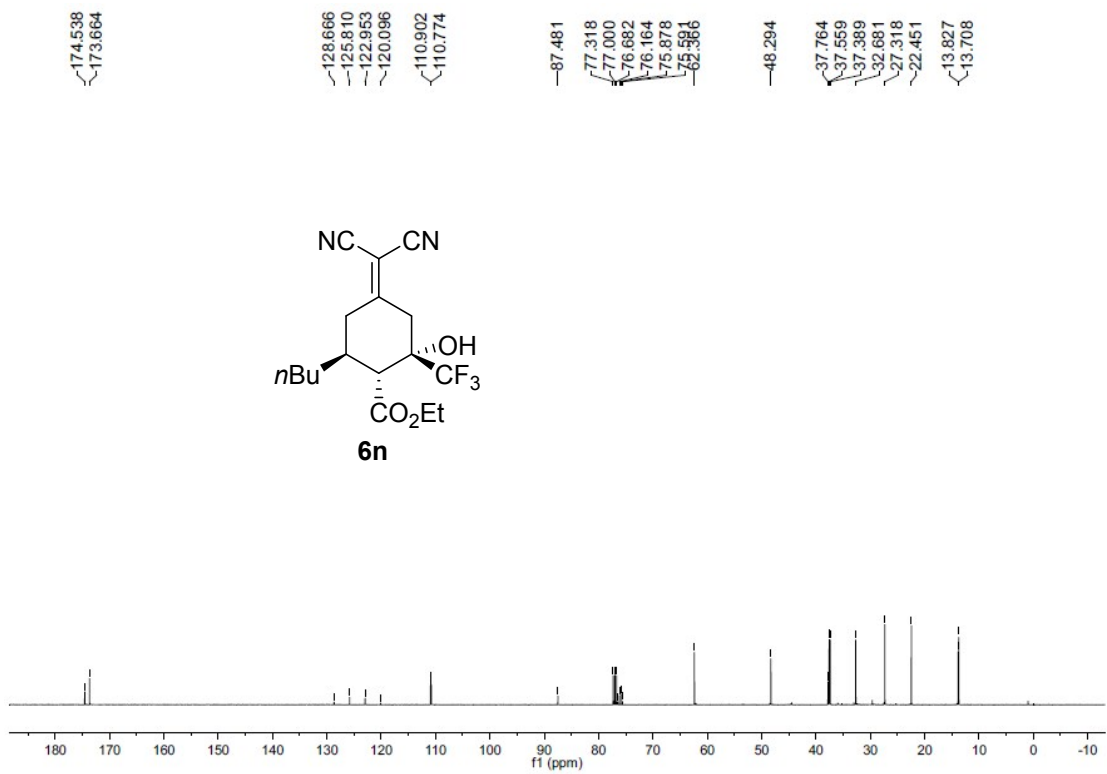

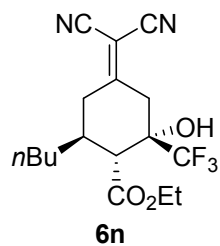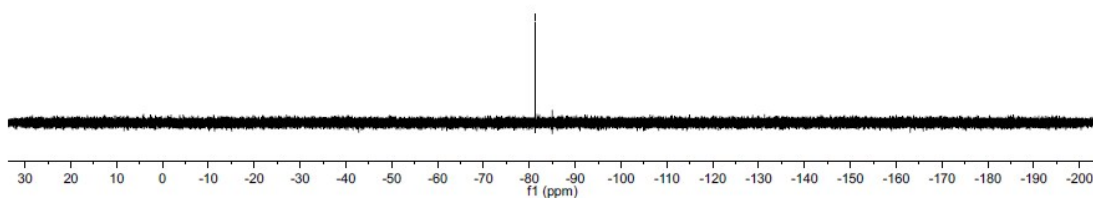

**Chromatogram**

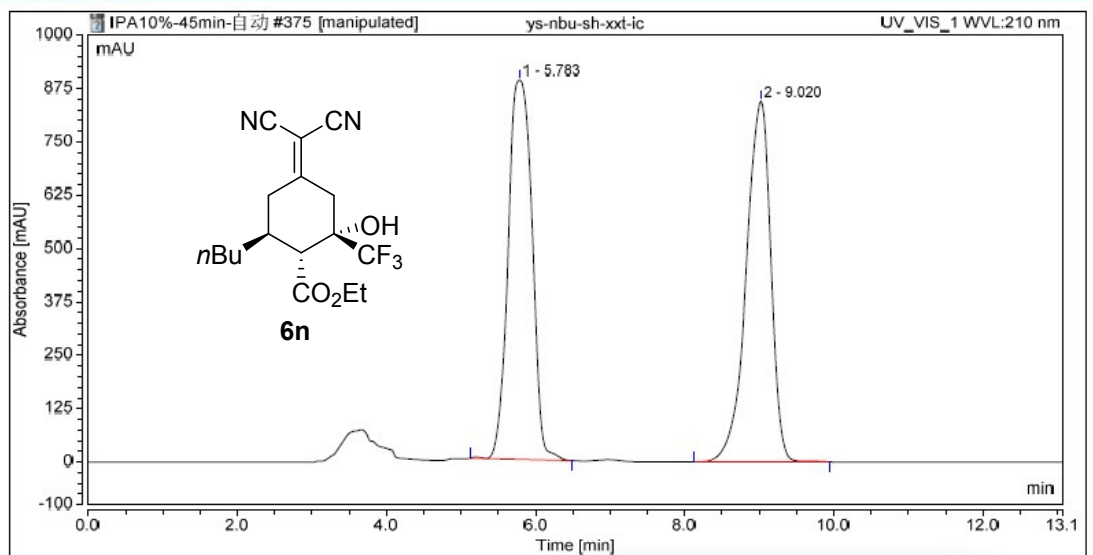

| Integration Results |           |                       |                 |               |                    |                      |        |
|---------------------|-----------|-----------------------|-----------------|---------------|--------------------|----------------------|--------|
| No.                 | Peak Name | Retention Time<br>min | Area<br>mAU*min | Height<br>mAU | Relative Area<br>% | Relative Height<br>% | Amount |
| 1                   |           | 5.783                 | 329.299         | 888.155       | 50.46              | 51.25                | n.a.   |
| 2                   |           | 9.020                 | 323.347         | 844.941       | 49.54              | 48.75                | n.a.   |
| Total:              |           |                       | 652.646         | 1733.096      | 100.00             | 100.00               |        |

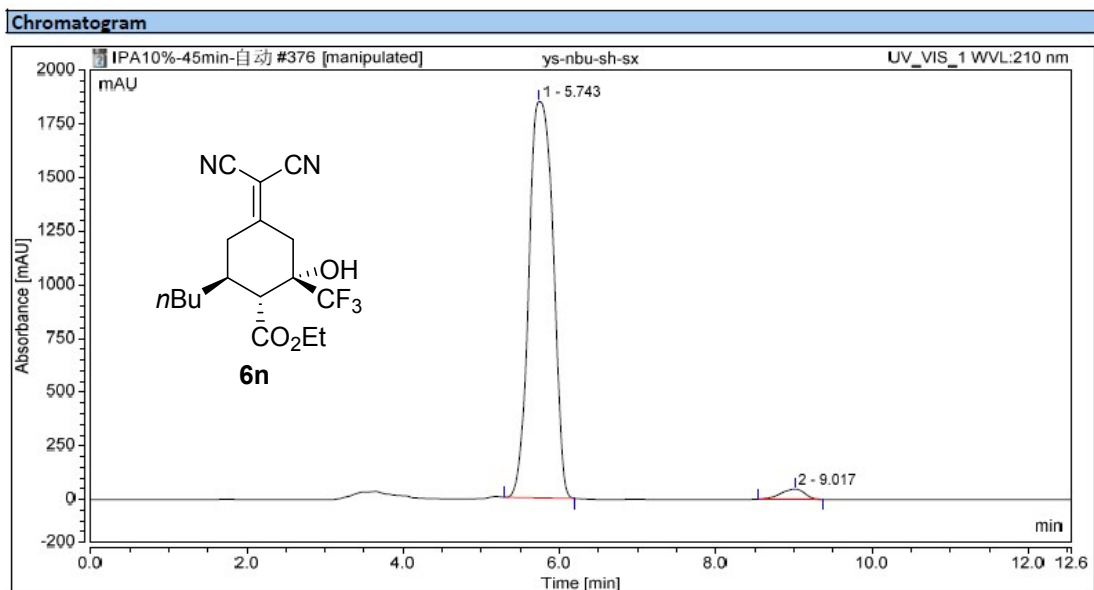

**Integration Results**

| No.           | Peak Name | Retention Time<br>min | Area<br>mAU*min | Height<br>mAU   | Relative Area<br>% | Relative Height<br>% | Amount<br>n.a. |
|---------------|-----------|-----------------------|-----------------|-----------------|--------------------|----------------------|----------------|
| 1             |           | 5.743                 | 662.293         | 1847.513        | 97.48              | 97.45                | n.a.           |
| 2             |           | 9.017                 | 17.090          | 48.332          | 2.52               | 2.55                 | n.a.           |
| <b>Total:</b> |           |                       | <b>679.383</b>  | <b>1895.845</b> | <b>100.00</b>      | <b>100.00</b>        |                |

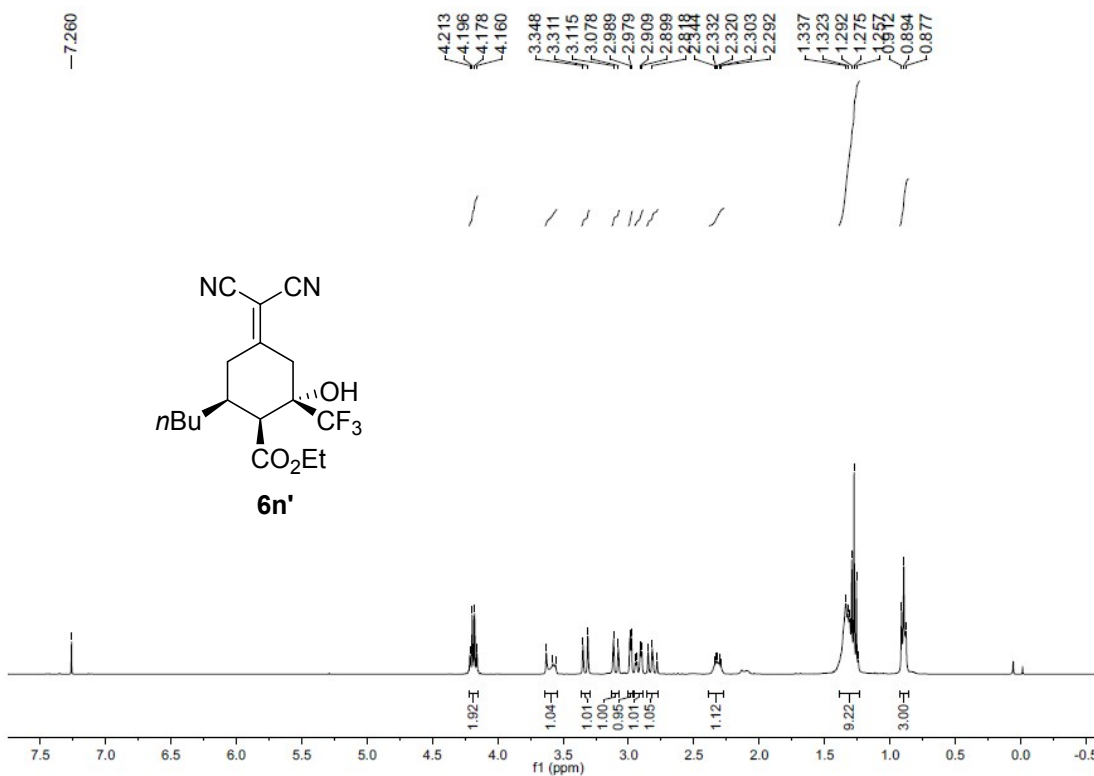

—179.128

—170.087

~128.650

~125.809

~122.963

~120.120

~111.152

~110.971

—86.088

~77.319

~77.000

~76.681

~75.753

~75.458

~69.395

—46.832

~35.690

~35.495

~35.325

~32.560

~28.609

~22.449

~13.938

~13.770

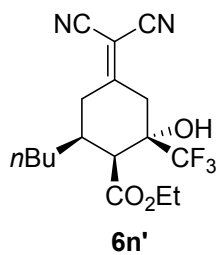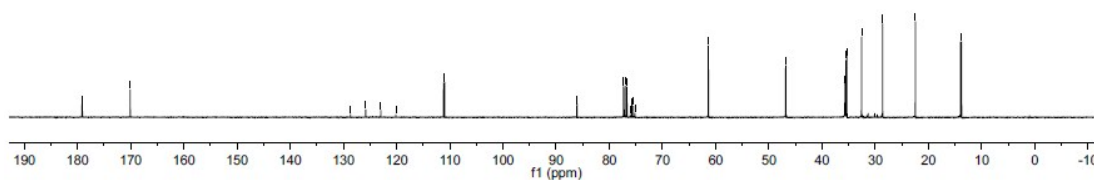

—81.278

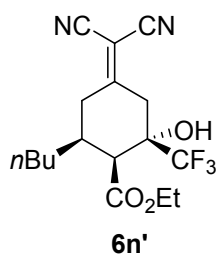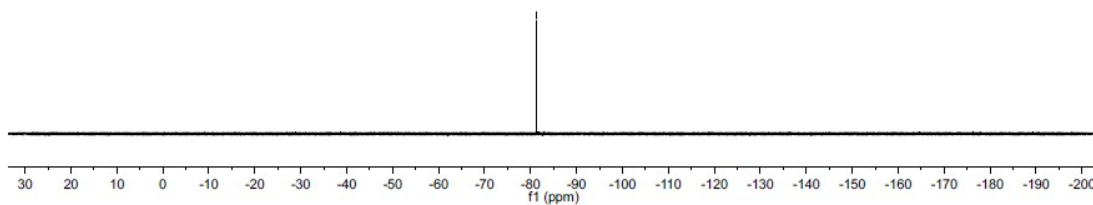



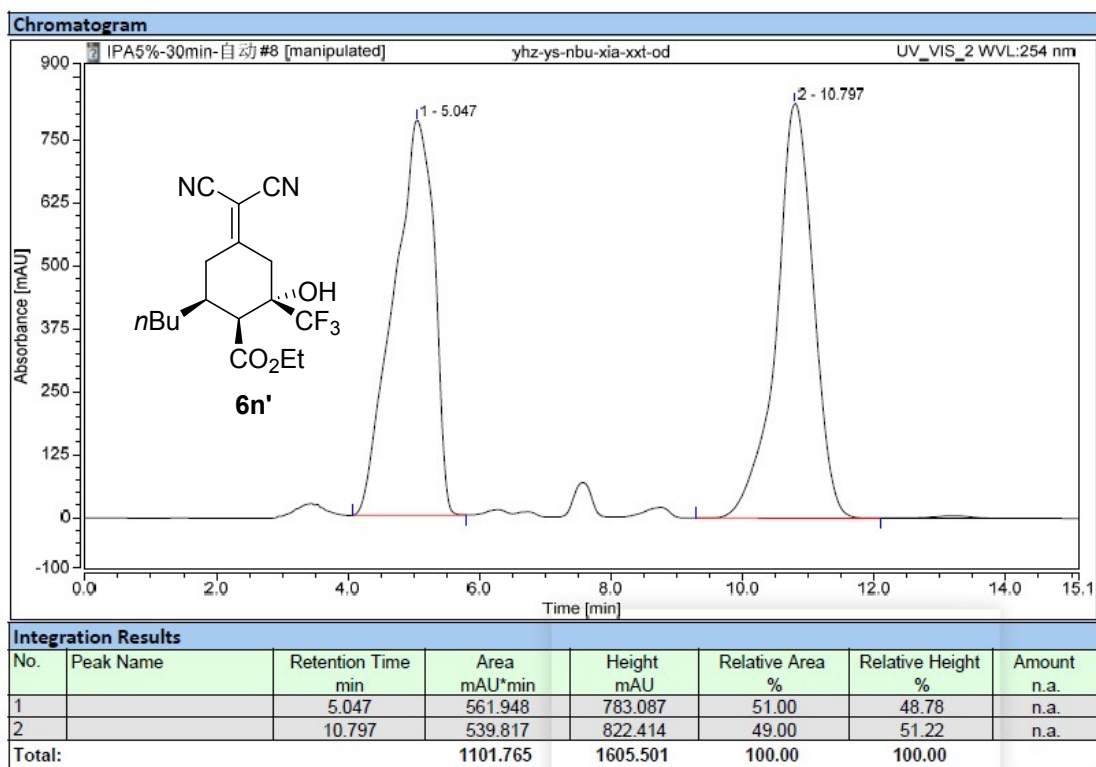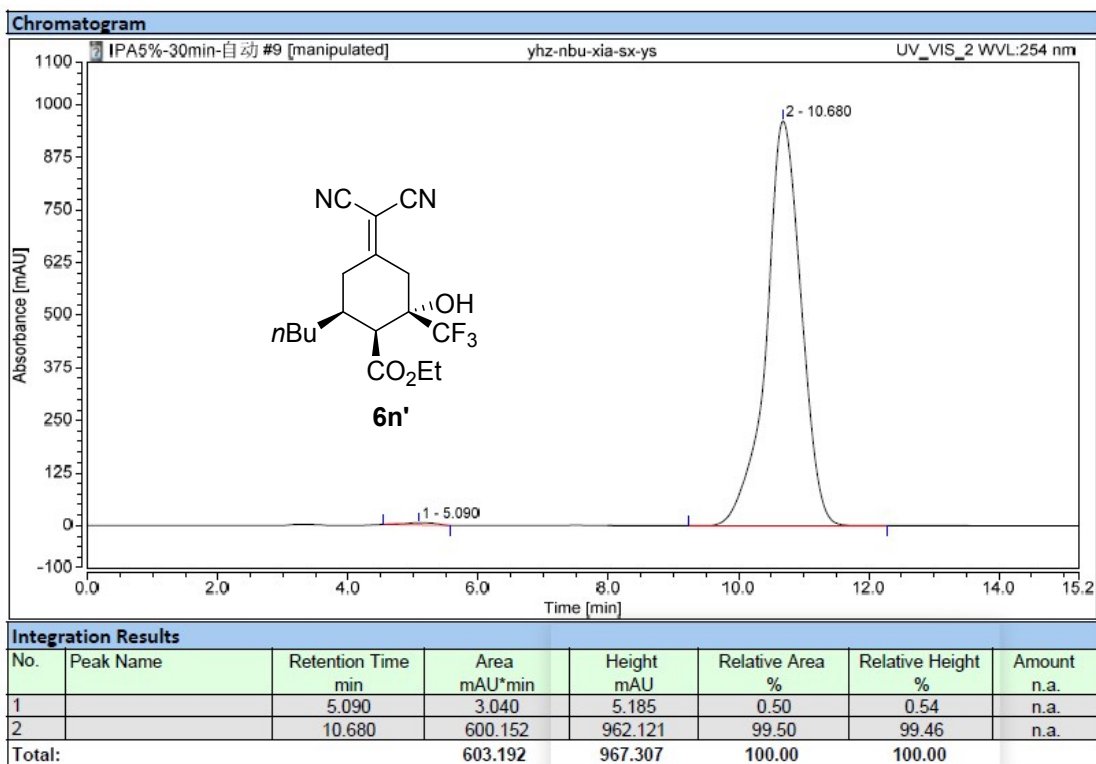

Supplement: d0ob00004c1.pdf [file d0ob00004c1.pdf]
